# Supplementary material for: Yap1 safeguards mouse embryonic stem cells from excessive apoptosis during differentiation
Source: eLife. 2018 Dec 18;7:e40167. doi: 10.7554/eLife.40167 (PMC6307859; doi:10.7554/eLife.40167)
Supplement: Figure 3—source data 1. [file elife-40167-fig3-data1.xlsx]

## Sheet: Figure 3-figure supplement 1D
gene_id	BirA_FPKM	FB_Yap1_19_FPKM	L+_Emp_FPKM	L+_shYap1_FPKM	L-4D_Emp_FPKM	L-4D_shYap1_FPKM			ProApop	Emp L- vs L+	ProApop	Yap1KDL-vsL+		AntiApop	Emp L- vs L+	AntiApop	Yap1KDL-vsL+
0610005C13Rik	0	0.0523667	0.0916091	0	0.10632	0.0779367			Msx1	4.50409	Msx1	4.33892		Plaur	2.96804	Cxcl12	3.324
0610007P14Rik	53.8854	72.9059	54.2488	60.2922	50.2786	45.7148			Clu	1.89175	Flcn	1.5001		Creb3	2.71806	Snai1	1.60696
0610009B22Rik	46.9257	52.6672	64.1227	68.9416	30.3805	37.9865			Bok	1.43053	Pmaip1	1.31315		Mmp9	2.58693	Hsph1	1.50286
0610009L18Rik	0.937439	0.720746	2.24137	2.14898	1.30065	0.6934			Bcl2l11	1.42468	Bok	1.17206		Clu	1.89175	Bcl2	1.28457
0610009O20Rik	19.6452	25.7152	16.492	18.5377	25.2185	25.6137			Pmaip1	1.06051	Trp73	1.16248		Cxcl12	1.80061	Creb3	1.25772
0610010F05Rik	3.24898	3.75636	5.94055	5.50834	5.7207	8.04283			Sh3glb1	0.984651	Sfpq	1.15269		Snai1	1.79228	Creb3l1	1.14695
0610010K14Rik	123.576	141.265	124.968	124.657	115.882	125.54			Nck2	0.962442	Slc9a3r1	1.12281		Cd44	1.7396	Bag5	1.13906
0610011F06Rik	10.9675	20.0779	13.123	13.7842	13.7798	11.696			Slc9a3r1	0.962011	Bcl2l11	1.03758		Bcl2l1	1.62267	Hif1a	1.08844
0610012G03Rik	26.28	33.1218	25.5889	24.0181	21.4657	24.7589			Sfpq	0.852297	Sirt1	0.907956		Bcl2	1.45957	Mmp9	1.07726
0610030E20Rik	1.30538	1.49709	1.67404	1.46688	1.8331	1.738			Trp73	0.751964	Nck2	0.861748		Src	1.39403	Ddx3x	1.03475
0610031J06Rik	36.6651	41.6719	30.24	32.2445	45.9172	50.1135			Flcn	0.702865	Skil	0.840151		Ptgs2	1.32469	Bcl2l1	1.00762
0610037L13Rik	14.7713	14.5268	10.8789	14.8906	15.0859	17.1315			Cav1	0.685738	Sh3glb1	0.776663		Creb3l1	1.28101	Trim32	1.0004
0610038B21Rik	0.370776	0.235977	0.521118	0.378017	0.22304	0.380455			Plagl2	0.610809	Plagl2	0.6487		Mapk8ip1	1.20851	Grina	0.988633
0610039K10Rik	0.0940435	0.117285	0.0621571	0.0762492	0.070083	0			Trp53	0.533938	Casp3	0.533315		Herpud1	1.15641	Mapk7	0.90945
0610040B10Rik	0.276857	0.478935	0.722128	1.34399	0.419044	0.921528			Fis1	0.506905	Trp53	0.51387		Bag5	1.0813	Sirt1	0.907956
0610040F04Rik	0.48966	0.622373	0.436135	1.53324	0.590532	0.494724			Fbxw7	0.469953	Fis1	0.414248		Grina	1.03804	Usp47	0.871663
0610040J01Rik	0.733922	1.04687	0.806019	0.843822	2.19246	1.45716			Bbc3	0.369122	Bclaf1	0.341499		Usp47	1.01451	Herpud1	0.833111
0610043K17Rik	0.313242	0.090313	0.510645	0	0.118529	0			Steap3	0.284097	Fbxw7	0.275292		Sh3glb1	0.984651	Sh3glb1	0.776663
1010001N08Rik	0	0.0799565	0.0904251	0.224405	0	0			Dnm1l	0.27331	Cav1	0.270879		Trim32	0.918776	Dnaja1	0.774491
1110001J03Rik	94.8297	99.6675	110.73	112.188	51.947	66.3709			Ubb	0.244409	Nkx3-1	0.222582		Gpx1	0.914507	Mapk8ip1	0.724622
1110002L01Rik	5.64723	3.10011	8.31217	6.82002	5.543	4.79305			Skil	0.191902	Il20ra	0.210961		Ddx3x	0.894253	Tmbim6	0.696368
1110004E09Rik	54.9925	63.0721	51.3341	55.263	44.1616	53.5558			Nox1	0.175385	Bax	0.188606		Syvn1	0.883724	Lrrk2	0.678745
1110004F10Rik	72.5492	71.991	80.3563	80.9658	74.6325	80.3747			Bad	0.170425	Clu	0.137113		Hsph1	0.847424	Src	0.668863
1110006O24Rik	0.458636	0.198349	0.373833	0.556609	0.520636	0.254431			Casp3	0.167446	Fbxo18	0.135465		Tmbim6	0.824122	Mif	0.649327
1110007C09Rik	21.9773	22.6123	26.8353	26.0619	23.4807	30.9582			Plscr1	0.164114	Ubb	0.0950981		Cd74	0.80069	Ybx3	0.618742
1110008F13Rik	164.46	152.509	149.753	165.243	175.937	178.398			Il19	0.162516	Park7	0.0740297		Ptpn1	0.761448	Plaur	0.574929
1110008L16Rik	12.0314	10.8966	11.4363	12.0649	9.55696	13.43			Fbxo18	0.129339	Spop	0.0721166		Lrrk2	0.699478	Nfe2l2	0.555519
1110008P14Rik	40.4727	40.9032	44.9491	51.3747	32.1445	41.2554			Rad9a	0.036248	Bbc3	0.0681713		Mapk7	0.665989	Nono	0.550962
1110012L19Rik	19.8132	21.847	20.859	23.8621	28.6153	20.9761			Bax	0.0246601	Nox1	0.045246		Hspb1	0.590368	Cep63	0.539446
1110017D15Rik	0	0.133214	0.298544	0.370513	0.188408	0			Nkx3-1	0.0215002	Nacc2	0.0371838		Nme5	0.568129	Cd44	0.52819
1110019D14Rik	1.44326	1.11921	2.43393	1.97303	1.46888	1.10436			Spop	0.0140503	Dnm1l	0.0289481		Hif1a	0.55876	Bid	0.503685
1110020A21Rik	0.398253	0.11484	0.259804	0.241647	1.14199	0.458299			Sirt1	0.0100902	Casp9	0.0207168		Tpt1	0.550574	Ptpn1	0.469584
1110028F11Rik	0.0514194	0	0.0335294	0	0.0194568	0			Bclaf1	-0.0103252	Rad9a	0.0160536		Ybx3	0.533365	Park2	0.4644
1110028F18Rik	0	0	0.0369499	0	0.0428833	0			Il20ra	-0.0260502	Rpl11	-0.0324927		Park2	0.406308	Ppif	0.46242
1110032A03Rik	1.917	1.41116	1.83515	1.68301	2.87066	2.03643			Nacc2	-0.0474706	Rps7	-0.0336694		Hyou1	0.397919	Tpt1	0.458167
1110032F04Rik	0.243787	0.374869	0.264947	0.284907	0.491988	0.721293			Serinc3	-0.0509429	Pias4	-0.105683		Mdm2	0.387856	Gpx1	0.433851
1110034G24Rik	6.81145	8.17785	7.72307	9.29468	4.42392	4.22988			Pias4	-0.0720702	Bad	-0.150902		Nono	0.344742	Vdac2	0.302224
1110037F02Rik	13.7833	13.5913	13.5635	11.9714	13.758	12.6013			Ripk3	-0.087804	Siah1a	-0.187632		Pdx1	0.340374	Epo	0.272165
1110038B12Rik	141.129	135.077	150.023	186.518	189.698	192.306			Eif2ak3	-0.0962604	Eif2ak3	-0.191189		Dnaja1	0.324506	Armc10	0.260656
1110038F14Rik	39.9908	39.4956	33.3313	36.0031	36.0424	30.0911			Park7	-0.172979	Rps3	-0.244966		Epo	0.298794	Syvn1	0.159125
1110046J04Rik	0.112845	0.0650702	0.515206	0.182703	0.256214	0			Prkra	-0.205296	Rpl26	-0.253661		Bdkrb2	0.27165	Rrn3	0.156076
1110051M20Rik	7.14123	12.061	6.78403	6.48171	6.72121	8.28526			Ralbp1	-0.26	Ripk3	-0.343689		Zfp385a	0.267551	Clu	0.137113
1110054M08Rik	0.484192	1.31466	1.39501	1.44483	0.454917	0.720986			Rps7	-0.268668	Serinc3	-0.360044		Xbp1	0.261207	Xbp1	0.114883
1110057K04Rik	17.3676	15.825	14.2921	14.2499	25.1031	19.2961			Lck	-0.293079	Prkra	-0.364363		Ppif	0.257251	Hyou1	0.100223
1110058L19Rik	52.3212	51.7088	53.0007	53.0848	26.3621	33.2164			Bcap31	-0.295896	Ptpn2	-0.417439		Cep63	0.234889	Park7	0.0740297
1110059E24Rik	14.4189	12.4716	26.4223	29.165	8.76148	10.9183			Plekhf1	-0.303534	Steap3	-0.443697		Vdac2	0.234067	Ndufa13	0.0122182
1110059G10Rik	2.8301	2.00763	3.05361	2.65218	1.77198	1.85239			Casp9	-0.318642	Ei24	-0.447038		Bid	0.219421	Ptgs2	0.00134344
1110065P20Rik	29.2194	39.1029	33.6819	37.797	31.8564	31.1131			Rps3	-0.342151	Mtch2	-0.479883		Nfe2l2	0.161046	Zfp385a	-0.0265548
1190002F15Rik	6.49186	8.21778	8.84509	13.0585	4.67793	5.33416			Nck1	-0.366551	Bub1	-0.507969		Pink1	0.145666	Vnn1	-0.0335449
1190002N15Rik	6.57057	6.52902	5.24658	4.94134	6.40068	9.3839			Siah1a	-0.429929	Ralbp1	-0.509557		Ccar2	0.143834	Mdm2	-0.0364277
1190005I06Rik	25.391	29.4234	22.6066	17.3828	43.7895	35.35			Ptpn2	-0.442647	Plscr1	-0.518935		Bcl2l12	0.139103	Ndufs3	-0.0762964
1190007I07Rik	20.0365	22.5235	22.2318	26.8247	19.653	25.2246			Rpl26	-0.465281	Mcl1	-0.522533		Ndufa13	0.125203	Snai2	-0.0875421
1200014J11Rik	15.5205	14.9445	13.5515	13.6173	14.1685	14.4889			Sod1	-0.485777	Sod1	-0.527882		Mif	0.119337	Ikbkg	-0.120296
1300002E11Rik	8.51216	5.37616	8.93936	8.65509	7.61726	4.80469			Mtch2	-0.599243	Nck1	-0.584023		Pttg1ip	0.117083	Parl	-0.13124
1300002K09Rik	0.0188924	0.0544699	0.110873	0.0917124	0.100083	0.0838452			Ei24	-0.605706	Plekhf1	-0.789934		Vnn1	0.0922222	Pdx1	-0.132619
1300017J02Rik	0.372702	0.179094	0.546818	0.728734	0.0705141	0.0344598			Mcl1	-0.634817	Bcap31	-0.821786		Parl	0.0904811	Wfs1	-0.150028
1500004A13Rik	0.243949	0.29216	0.587349	0.622488	0.298229	0.291485			Bub1	-0.865623	Lck	-0.866177		Cdkn2d	0.0193485	Opa1	-0.150663
1500009C09Rik	0.668751	0.417204	0.873886	0.927552	0	0			Rpl11	-1.3403	Cyct	-1.93837		Pgap2	0.0181117	Nme5	-0.238313
1500009L16Rik	23.6364	20.9512	28.8724	27.0787	23.8503	14.3045			Cyct	-2.42901				Sirt1	0.0100902	Pgap2	-0.260724
1500011B03Rik	24.4896	22.1426	28.4463	32.4035	18.9645	18.9948								Tmem161a	0.00805785	Ccar2	-0.298569
1500011K16Rik	45.3295	43.4822	48.1975	65.8427	16.9507	20.4725								Ndufs3	-0.0588376	Pink1	-0.300717
1500012F01Rik	60.3331	55.9576	149.784	257.794	74.9071	98.7974								Bcl2l10	-0.100392	Hspb1	-0.316237
1500015A07Rik	8.1024	8.09237	6.67375	6.21045	9.56444	8.77464								Snai2	-0.133641	Bdkrb2	-0.319374
1500015O10Rik	0.283263	0.925588	0.430989	0.687547	0.643112	0.733329								Triap1	-0.14196	Hdac2	-0.329174
1600002D24Rik	0	0	0.025433	0	0	0								Ikbkg	-0.169618	Cdkn2d	-0.340049
1600002H07Rik	10.8158	9.83342	9.75701	9.87825	8.51169	8.54007								Park7	-0.172979	Hells	-0.340678
1600002K03Rik	9.42179	8.69267	7.84507	10.0858	9.65333	10.4536								Opa1	-0.177374	Uri1	-0.387864
1600010M07Rik	0	0.0907559	0	0.12734	0	0								Armc10	-0.179522	Bcl2l12	-0.402798
1600012H06Rik	7.48609	8.36725	9.66152	8.6163	5.71997	5.82941								Rrn3	-0.190301	Tmem161a	-0.405752
1600014C10Rik	2.05353	1.92827	1.7882	2.28659	2.48797	3.58801								Hdac1	-0.289382	Hdac1	-0.492489
1600014C23Rik	0.621498	0.597294	1.21579	1.00568	0	0								Wfs1	-0.351795	Kdm1a	-0.492765
1600014K23Rik	0.203188	0.527242	0.264988	0.32879	0.922621	0.563598								Map2k1	-0.458291	Map2k1	-0.50958
1600015I10Rik	0	0	0	0	0.0213462	0								Hdac2	-0.479055	Triap1	-0.511608
1600016N20Rik	0.907644	0.644158	2.18531	2.42902	0.396286	0.232394								Txndc12	-0.480793	Mcl1	-0.522533
1600020E01Rik	2.05493	0.888704	2.30408	1.66258	1.42553	1.32996								Kdm1a	-0.570691	Ivns1abp	-0.526523
1600023N17Rik	0.0802555	0.370224	0.209331	0.519464	0.0607365	0.0890445								Mcl1	-0.634817	Bcl2l2	-0.532872
1600029I14Rik	0	0.0564387	0	0	0	0								Nol3	-0.668125	Pttg1ip	-0.575879
1600029O15Rik	0	0.0693704	0.0784436	0.0324451	0	0								Bcl2l2	-0.712765	Bcl2l10	-0.587876
1700001C19Rik	0.211715	0.113967	0.288245	0.229419	0.327738	0.125843								Trap1	-0.735151	Trap1	-0.610184
1700001G11Rik	0.344063	0.861988	1.04792	0.556784	0.260316	0.253978								Ivns1abp	-0.762733	G2e3	-0.621906
1700001G17Rik	0.0942824	0.543664	0.245918	0.228846	0.0713519	0.523037								Rrm2b	-0.82355	Txndc12	-0.677713
1700001J03Rik	0	0	0.0734545	0	0	0								Uri1	-0.84645	Rrm2b	-0.766215
1700001J11Rik	0.028406	0.0491395	0.0185229	0.0229827	0.0214973	0.0945503								Hells	-0.857574	Fignl1	-0.882401
1700001K19Rik	0.172132	0.0496285	0.0561216	0.0696341	0.130268	0								Fignl1	-0.938587	Sod2	-0.986536
1700001K23Rik	0	0.132264	0.299138	0.371161	0	0								Ell3	-1.20784	Nol3	-1.04757
1700001L05Rik	11.687	9.56249	15.4077	13.3993	3.66358	5.75211								Sod2	-1.27562	Ell3	-1.83716
1700001L19Rik	0.36112	0.185097	0.68027	1.36348	0.121463	0.178074								G2e3	-1.42061	Ackr3	-1.8765
1700001O22Rik	0.833815	1.05825	0.835457	0.421624	0.646182	0.947426								Ackr3	-2.04668	Cd74	-2.16258
1700001P01Rik	1.85234	2.04723	2.51639	3.37204	0.116819	0.342532
1700003D09Rik	0	0	0.0354479	0.0439828	0	0.0603148
1700003E16Rik	0.174263	0.301457	0.0681796	0	0.369264	0.348024
1700003F12Rik	0.489219	0.705251	1.35579	0.989543	0.647913	0.678494
1700003G18Rik	0	0	0.304899	0	0	0
1700003M02Rik	0.34058	0.171841	0.360888	0.37889	0.161092	0.0944695
1700003M07Rik	0.361885	0.431325	0.577393	0.292793	0.492968	0.441668
1700006E09Rik	0	0	0.0854504	0	0	0
1700007G11Rik	0	0	0.0641161	0.0795534	0.967356	1.30913
1700007J10Rik	0.0715859	0	0.139432	0.0580973	0.0543402	0
1700007K09Rik	0	0.0791172	0.0894684	0	0	0
1700007K13Rik	15.6211	22.4881	13.3474	12.9002	19.4042	17.8099
1700007L15Rik	5.12248	5.28935	5.5153	6.65045	2.61447	3.17216
1700008F21Rik	0	0	0	0	0	0
1700008I05Rik	0.286603	0.165265	0.827645	0.36439	0.557739	0.454272
1700008J07Rik	2.25153	2.38024	2.03286	1.7516	2.99281	3.10662
1700008O03Rik	2.00929	1.63261	2.56087	2.14293	2.07356	0.911999
1700009N14Rik	0	0	0	0	0.046098	0
1700009P17Rik	1.78777	2.86855	2.63563	2.264	1.05884	0.172482
1700010B08Rik	0	0	0	0.0755056	0	0
1700010I14Rik	0.345982	0.133003	0.250674	0.52875	0.552763	0.426523
1700011A15Rik	0.0923828	0	0	0	0.0699143	0
1700011B04Rik	0	0	0.0951636	0	0	0
1700011E24Rik	0	0	0	0.0812968	0	0
1700011H14Rik	0	0	0.0873099	0.0541658	0	0
1700011L22Rik	0	0	0	0	0	0.0925144
1700011M02Rik	0	0.174704	0	0	0	0
1700012B07Rik	0.0878315	0	0	0.142126	0.0664695	0
1700012B09Rik	0	0	0.17556	0	0	0
1700012D01Rik	0.263702	0.228089	1.03172	0.960099	0.498916	0
1700012D14Rik	0	0.175905	0.397839	0.123407	0	0.169231
1700013F07Rik	0	0.28929	0	0.135302	0.126557	0
1700013G24Rik	0	0.0447128	0	0.0627369	0	0
1700013H16Rik	0	0	0.494466	1.78943	1.2912	1.54245
1700015F17Rik	0	0	0	0	0	0
1700015G11Rik	0	0	0	0	0.269864	0.395642
1700016C15Rik	0	0	0	0.096027	0	0
1700016D06Rik	1.03453	0.315819	0.793641	1.57556	0.0460543	0
1700016G22Rik	0	0	0	0	0	0
1700016H13Rik	0.775813	0.383425	0.506184	0.284699	0.336957	0.390396
1700016K19Rik	1.9811	2.804	1.76159	1.02001	1.02223	1.29885
1700016L04Rik	0.0914614	0	0	0.0739995	0	0
1700017B05Rik	11.0977	10.9501	7.76801	6.50614	29.4414	20.572
1700017J07Rik	0.243281	0.140284	0.317276	0.787335	0	1.07969
1700018B08Rik	1.76707	0.127369	2.88066	2.50197	0.0557208	0.163382
1700018B24Rik	0	0.0234142	0.383925	0.279247	0.0307294	0.0450517
1700018C11Rik	0	0.0799718	0	0	0	0
1700018L02Rik	0.151711	0.499968	0.287954	0.273472	1.02825	1.22048
1700019A02Rik	1.68581	0.176745	1.89876	3.34789	0	0.340079
1700019B03Rik	0	0	0.0297959	0.11091	0.0345806	0
1700019B21Rik	2.99453	0	8.46154	5.38402	1.51081	0.553741
1700019D03Rik	24.4111	33.5938	34.3774	33.3601	16.223	33.7987
1700019E08Rik	0	0	0	0.121672	0	0.166853
1700019G17Rik	0.716781	0.522118	0.759519	0.955236	0.508549	0.347958
1700019G24Rik	0	0	0.545636	0.338505	0	0
1700019L03Rik	0.133639	0.203688	0.286071	0.431653	0.435834	0.538045
1700019N19Rik	0	0.207123	0.585553	0.871846	0	0
1700019O17Rik	0	0	0.0553377	0	0	0
1700020D05Rik	0.158334	0.273902	0.412983	0.640522	0	0.175673
1700020I14Rik	13.1656	12.9222	16.5083	15.219	17.1117	14.5542
1700020L24Rik	2.84174	1.84347	1.50559	0.934047	0.336031	0.295589
1700020M21Rik	0	0	0	0.119709	0	0
1700020N01Rik	2.78492	0.737837	3.48473	3.59298	0.512659	0.918621
1700020N15Rik	0.75999	0.219118	0.743358	0.307446	0	0
1700021F05Rik	69.4171	55.2132	67.7766	66.6287	31.7599	37.8901
1700021F07Rik	0	0	0.193405	0.479943	0	0
1700021K19Rik	4.09892	4.30272	4.81928	4.53064	6.37584	4.65974
1700021N21Rik	0	0	0.120136	0.0745305	0	0.102206
1700022A21Rik	0.207099	0.11942	0.101283	0.251339	0	0
1700022I11Rik	0.0182479	0	0	0	0	0.0202463
1700023E05Rik	0	0.147	0.138527	0.0343761	0.418008	0.235705
1700023F06Rik	1.68442	1.71844	2.11225	1.99183	0.833491	0.790683
1700023L04Rik	0.282875	0.407788	0.558136	0.915473	0	0
1700024F13Rik	0.278578	0.0803189	0.181655	0.225392	0.210825	0
1700024G13Rik	0.67589	0.389741	0	0.546849	1.53452	0.749909
1700024P16Rik	0.089746	0.0129311	0.171548	0.127074	0.169804	0.0497836
1700025F24Rik	0	0	0	0	0.141663	0
1700025G04Rik	1.66102	1.30292	1.96451	1.6649	2.29524	1.99214
1700025N23Rik	0	0	0.0603275	0	0	0
1700026D08Rik	0.118235	0.0340891	0	0.191323	0	0
1700026L06Rik	1.52556	1.35952	0.994783	2.4686	1.99418	1.07713
1700027F09Rik	0	0	0.0750346	0	0	0
1700028B04Rik	3.73364	3.66001	6.33002	6.64579	0.565116	2.48551
1700028E10Rik	0	0.341449	0.252192	0.205324	0.064018	0.187711
1700028I16Rik	0.908545	0.785846	1.87606	1.2864	0.28649	0.0840035
1700028J19Rik	0.262319	0.302524	0.598682	0.689768	0.39704	0.0727614
1700028K03Rik	0.115855	0.0131581	0.318295	0.131604	0.0172267	0.0513253
1700028P14Rik	0	0	0.063436	0	0	0
1700029H14Rik	0.0565585	0	0	0	0	0
1700029I15Rik	0.410612	0.236773	0	0	0.310746	0.911157
1700029J03Rik	0	0.063726	0	0	0	0
1700029J07Rik	0.152126	0.0877209	0.0826648	0.123082	0.115127	0.0843927
1700029M20Rik	0.122229	0.183254	0.159407	0.197792	0	0.162739
1700029P11Rik	3.22595	3.40279	3.9506	3.56494	0.535909	0.611088
1700030A11Rik	0	0.0544464	0	0.0763941	0	0.104761
1700030C10Rik	1.14339	3.44311	2.18151	1.85019	1.24989	1.08067
1700030J22Rik	1.81229	1.37997	1.42416	1.84225	1.1781	0.876483
1700030K09Rik	4.6868	4.70447	5.22565	5.05599	3.50313	3.46671
1700030M09Rik	0	0	0.276896	0.274852	0.0642721	0
1700030O20Rik	0	0.287791	0.108481	0.1346	0	0
1700031A10Rik	0	0.0826503	0.0934637	0.115967	0	0
1700031F05Rik	0	0	0	0.0450901	0	0
1700034F02Rik	0.330219	0.228557	0.453736	0.455926	0.34987	0.256977
1700034H15Rik	0.128773	0.0441022	0.146088	0.0579308	0.0540783	0.160378
1700034I23Rik	0	0.0173227	0	0.0243056	0	0.0333309
1700034J05Rik	0	0	0	0.028586	0.026633	0
1700034K08Rik	0	0	0	0	0.118819	0.174198
1700034P13Rik	1.68987	3.30608	2.18915	2.51378	1.38196	0.910695
1700037C18Rik	0.722197	0.832887	0.800578	0.934903	1.03845	1.92309
1700037H04Rik	96.3962	93.4665	89.6058	98.0056	52.5383	58.4069
1700039E15Rik	0	0.072873	0	0	0	0
1700040L02Rik	0.124664	0.179714	0.284517	0.252158	0	0
1700042G07Rik	0	0	0	0.282286	0	0
1700042G15Rik	0	0	0	0	0	0
1700042O10Rik	1.85131	0.469714	1.69008	2.21683	0.0560422	0.492974
1700044C05Rik	0	0	0	0.151673	0	0
1700045H11Rik	0	0	0	0	0	0
1700047E10Rik	0	0	0.232638	0.144325	0	0
1700047I17Rik2	0	0	0.0115224	0	0	0
1700048M11Rik	0	0	0.15229	0.377913	0	0
1700048O20Rik	0.117437	0.0451455	0.89341	1.10852	0.237	0.304028
1700049E22Rik	1.50354	0.123856	1.54066	2.25917	0	0
1700049G17Rik	0.804064	0.63565	0.9556	0.734493	0.333697	0.460448
1700051A21Rik	0	0.0643836	0.145614	0.271011	0.0422493	0
1700052I22Rik	0	0.437718	0	0	0	0
1700052K11Rik	0.349375	0.386134	0.170864	0.23556	1.34405	1.55054
1700052N19Rik	23.8352	21.3186	24.5703	25.4965	15.6814	19.9795
1700055N04Rik	0.752746	0	0	0	0	0
1700056E22Rik	0.0845916	0.390227	0.275801	0.205324	1.28036	1.12626
1700060C20Rik	0	0.0969372	0.109618	0.272021	0	0
1700061G19Rik	3.45701	2.42177	2.90629	3.90654	0.475678	0.538885
1700063D05Rik	0	0	0.417868	0.725871	0	0.142201
1700065D16Rik	0.235213	0	0	0	0.262618	0.385028
1700066B17Rik	0.198824	0	1.03719	0.643459	0	0
1700066B19Rik	0.139803	0.209599	0.109395	0.203601	0.084641	0
1700066M21Rik	4.10547	4.03376	5.26444	5.17732	2.23911	2.64652
1700067G17Rik	0	0.0937438	0	0	0	0
1700067K01Rik	0.513042	0.633937	0.382335	0.770884	0.499197	0.325272
1700069L16Rik	0	0.149299	0.253249	0.104741	0	0
1700071K01Rik	0	0	0	0	0	0
1700071M16Rik	0	0.0503117	0.060188	0	0.109864	0.104348
1700073E17Rik	0	0.00843029	0	0	0	0.0162209
1700080O16Rik	0	0	0	0.0416881	0	0
1700081H04Rik	0	0	0	0	0	0
1700084C01Rik	0.0521109	0.120196	0.135921	0.168647	0.236622	0.231271
1700084E18Rik	1.13684	1.31108	2.0386	1.60964	0.860348	0.630669
1700084J12Rik	3.80595	1.69908	2.72195	3.47665	2.60157	2.45192
1700086L19Rik	0	0	0.0685218	0	0	0.116592
1700086O06Rik	0.302266	0.698658	0.968947	0.565705	2.60164	1.65874
1700088E04Rik	0.255674	0.420322	0.311827	0.185752	0.235817	0.867259
1700092C10Rik	0	0	0	0.143925	0	0
1700092M07Rik	0	0.860356	1.21615	0.905378	0.846865	2.48314
1700093K21Rik	0	0.0466261	0.0903761	0.0467122	0.0611956	0.128117
1700094D03Rik	0.488864	0.334178	1.03102	0.970844	0.58859	0.320509
1700094J05Rik	0.103737	0	0	0	0.0701372	0
1700095A21Rik	0.0745687	0	0.194498	0.180996	0.0564328	0
1700095B10Rik	0	0.000141539	0.147441	0	0	0.0271177
1700096K18Rik	0.362131	0.686113	0.60721	0.627841	0.195755	0.573984
1700097N02Rik	1.41115	0.348735	1.38026	3.01743	1.44935	1.23018
1700101E01Rik	2.57533	3.53333	2.14257	1.86809	2.68825	1.675
1700101I11Rik	0.322114	0	0	0.260616	0	0
1700102H20Rik	0.331001	0.95435	1.07922	0.48162	0.751507	0.73451
1700102P08Rik	1.51491	1.37272	2.02272	1.92607	0.655124	2.00097
1700104L18Rik	0	0	0	0	0	0
1700105P06Rik	0.370135	0.320149	0	0.149734	0	0.205335
1700106J16Rik	0	0	0.165637	0.0513795	0	0
1700108F19Rik	0.0972829	0.224386	0.253744	0.0787095	0	0
1700109G14Rik	0.108828	0	0.141928	0	0	0.120746
1700109H08Rik	0.129036	0	0.84285	0.307405	0.0989587	0.293997
1700109K24Rik	0.0727932	0.0844132	0.284805	0.176723	0.220356	0
1700110C19Rik	0	0.0720348	0.0814594	0.101073	0	0
1700110K17Rik	0	0	0.17933	0	0	0
1700112E06Rik	0	0	0	0	0	0
1700113A16Rik	4.63931	2.8185	5.13202	4.02168	3.76177	2.75752
1700119H24Rik	0	0	0	0	0.128567	0
1700120C14Rik	0.611753	2.30932	1.97928	1.3712	0.3613	0
1700120K04Rik	0	0.331621	0.250006	0	0.290152	0.638079
1700121N20Rik	0	0	0	0.0633491	0	0.173745
1700122O11Rik	0	0	0	0	0	0
1700123I01Rik	0.685407	0.263486	0.566122	1.51577	0.172903	0.304187
1700123M08Rik	0.673465	0.302045	0.536741	0.787058	1.24586	0.830243
1700123O20Rik	24.6889	36.4069	22.4492	23.1255	22.3905	23.6566
1700124L16Rik	1.38743	0.800037	0	2.24507	0	0
1700125H03Rik	0	0	0.15229	0.377913	0	0
1700125H20Rik	0.167418	0.0482695	0.10917	0	0.1267	0
1810007D17Rik	0	0	0.156815	0.0972861	0	0.133411
1810009A15Rik	289.883	275.024	235.834	267.165	206.241	221.684
1810010D01Rik	0	0	0	0.142909	0	0
1810010H24Rik	0.864691	0.831017	0.610833	1.28261	0.21813	0.159898
1810011O10Rik	0.285847	0.56042	0.33551	0.277528	0.0865305	0.126861
1810012K16Rik	0	0.110872	0	0	0	0
1810013L24Rik	18.5813	15.0809	15.0616	14.2545	14.8412	15.4944
1810014B01Rik	2.45523	1.28468	1.71959	2.64864	1.30755	2.06831
1810019D21Rik	0.239616	0.91771	0.934262	0.666363	0.664964	0.304652
1810020O05Rik	0.229573	0	0.199599	0.371485	0	0.0849047
1810021B22Rik	0	0	0.093883	0	0	0
1810022K09Rik	34.9353	13.8136	28.6384	26.6502	16.3668	25.1025
1810024B03Rik	0	0.104974	0.158278	0.14729	0.183695	0
1810026B05Rik	1.24271	0.956236	1.41156	1.26825	1.45008	1.29524
1810026J23Rik	13.4376	12.6331	10.6353	11.6869	14.5388	16.4001
1810030O07Rik	16.2123	14.9232	11.4748	12.2601	10.6457	11.5097
1810032O08Rik	10.076	7.48839	35.4071	41.7828	27.5544	17.1324
1810034E14Rik	0.201377	0.0696726	0.105051	0.130344	0	0.0446861
1810037I17Rik	69.8897	63.5846	74.3567	91.9891	35.0503	48.9748
1810041L15Rik	0.258625	0.42146	0.329954	0.227443	1.53176	0.711131
1810043G02Rik	3.23586	3.30887	3.54485	3.49075	3.49371	4.11679
1810043H04Rik	55.466	54.2555	45.8324	53.2339	43.1656	47.8369
1810044D09Rik	3.23433	4.66256	5.42323	4.48599	1.39869	0.768971
1810055G02Rik	16.299	21.5835	16.4049	12.7838	26.3241	15.2756
1810058I24Rik	73.7352	58.6143	71.7112	69.7666	46.8835	39.3312
1810062G17Rik	0	0.105329	0.0595551	0.0738942	0.0691185	0
1810062O18Rik	0.146008	0.076205	0	0	0	0.139369
1810064F22Rik	0	0	0	0	0	0
2010002M12Rik	0	0.0234513	0.0265195	0	0	0
2010003K11Rik	0	0	0	0	0.0506651	0
2010009K17Rik	0	0	0	0	0.256867	0
2010010A06Rik	0.587765	0.932045	1.32059	1.54553	6.1162	3.4237
2010012O05Rik	1.89202	1.78698	1.9357	2.40176	1.20967	2.09922
2010015L04Rik	2.09463	2.3661	3.02222	2.55941	1.89897	3.26144
2010016I18Rik	0	0	0	0.0526626	0	0
2010107E04Rik	592.899	570.828	511.94	546.391	307.574	346.797
2010107G12Rik	0.0987663	0.075936	0.150274	0.372912	0.224236	0.328747
2010107G23Rik	17.7043	23.1402	17.152	21.5204	5.9017	8.69913
2010109A12Rik	0	0	0.246328	0.152818	0.142942	0
2010111I01Rik	9.22768	7.48966	7.14899	9.44151	10.5631	10.4329
2010204K13Rik	64.9627	63.9642	51.7462	49.4389	63.9289	81.0893
2010300C02Rik	0.541019	0.721987	0.836607	0.912973	0.795478	0.548816
2010308F09Rik	0.243246	0.14028	0.158635	0.590498	0	0.26992
2010310C07Rik	0	0	0	0	0.152653	0
2010320M18Rik	5.85899	6.75698	6.47148	5.99803	5.5199	3.71464
2200002D01Rik	2.3627	15.1104	4.2018	1.39026	48.9279	3.57469
2200002J24Rik	0.319478	0.184222	0	0.129241	0	0.177232
2210010C04Rik	0	0	0	0	0	0.0736594
2210011C24Rik	4.77641	7.1553	6.70834	4.8046	4.43977	0.815306
2210013O21Rik	18.3307	22.2258	15.2482	19.4005	15.8971	20.4481
2210015D19Rik	3.56649	2.207	3.77856	4.3912	2.21637	3.47861
2210016F16Rik	10.3639	11.3292	6.62992	7.03401	9.47882	9.56419
2210016L21Rik	32.909	34.89	28.537	34.9408	33.0758	35.2318
2210018M11Rik	9.29374	7.94623	10.9326	10.1123	7.88864	7.11139
2210039B01Rik	0	0.0891028	0.201521	0.187531	0.116941	0.0857222
2210404O09Rik	1.30756	1.43441	2.10038	1.7804	1.30331	2.72458
2210408F21Rik	0.151443	0.0951738	0	0	0	0.168001
2210408I21Rik	0.807238	0.940055	0.901241	0.914491	0.983549	1.04489
2210409E12Rik	5.69319	9.41094	4.94987	6.14165	0	0.421111
2210416O15Rik	0	0.0673384	0.100128	0.0636565	0.0781484	0
2210417A02Rik	0.751097	0	0.979547	0.911545	0	0
2210420H20Rik	0	0	0	0	0	0
2300002M23Rik	0.123465	0.106791	0.161018	0.699252	0	0
2300009A05Rik	2.79915	3.41806	4.61683	4.1298	1.99375	2.19225
2310001H17Rik	0	0	0.336997	0.288605	0	0
2310001K24Rik	0.534808	1.04344	0.682996	1.44924	1.9653	0.874973
2310002D06Rik	0.214074	0	0	0	0	0
2310002F09Rik	0.0273646	0.0157794	0.0892192	0.0442802	0.0621277	0
2310002J15Rik	1.12057	1.29232	1.16912	1.99459	0	0
2310003H01Rik	8.76293	8.77101	5.89752	4.7266	8.22002	6.7938
2310005G13Rik	0.0449085	0	0	0.0181673	0.0509794	0.0498265
2310007B03Rik	0.0307246	0.0531505	0.0200348	0.0497172	11.045	0.717342
2310007L24Rik	0	0	0	0.0894143	0	0
2310008N11Rik	0	0	0	0	0.27303	0
2310009A05Rik	28.4937	25.8193	29.0498	24.5174	12.4933	15.0544
2310009B15Rik	12.3835	14.5875	12.5739	12.8819	13.7898	14.9173
2310010J17Rik	3.0013	3.67764	2.93562	2.73182	1.13567	2.08124
2310011J03Rik	17.698	19.39	12.2906	15.393	28.629	28.4234
2310014L17Rik	0.762479	0.561802	0.359086	0.428407	0.512921	0.328992
2310015A10Rik	0.332261	0.439067	0.649979	0.806475	0.240974	0.215044
2310015B20Rik	0.27332	0	0	0	0	0
2310022A10Rik	38.9024	38.7651	27.0925	31.9083	27.9968	26.728
2310022B05Rik	14.0863	19.0644	10.1985	10.3076	15.0656	16.2955
2310030A07Rik	0	0	0.104162	0	0.120889	0.177232
2310030G06Rik	4.47055	6.98173	3.7249	5.27483	9.39794	7.09574
2310033P09Rik	17.8995	18.8868	16.9809	22.4271	33.9594	27.8588
2310034G01Rik	0.553522	0.702194	1.01063	0.537411	0.335119	0.122828
2310034O05Rik	0	0	0	0.0577814	0	0
2310035C23Rik	10.1394	9.72795	10.9147	10.6617	10.3091	9.70138
2310036O22Rik	178.069	165.253	121.991	125.693	217.734	219.441
2310039H08Rik	7.15958	7.405	7.41047	6.89603	3.52619	3.90877
2310039L15Rik	0.295915	0	1.25423	1.67593	0	0
2310040G24Rik	1.85991	1.50201	1.33867	1.50939	0.771388	0.502593
2310042E22Rik	0.297781	0	0.310682	0.3373	0	0
2310043L19Rik	0	0	0.0854504	0	0	0
2310045N01Rik	22.9341	37.6901	24.8891	27.5682	37.3161	45.6205
2310047M10Rik	6.80655	8.22136	5.09497	5.80031	5.76073	4.33455
2310057M21Rik	8.06475	6.60653	7.1996	7.45716	10.1964	9.37403
2310061I04Rik	29.8614	31.4966	25.9626	30.7036	24.5291	23.7443
2310061J03Rik	1.33214	1.52958	0.632655	0.745401	0.865229	1.38039
2310067B10Rik	8.96967	12.5092	8.48924	8.52636	9.77128	8.37512
2310068J16Rik	0.518531	0.863132	1.0759	0.918242	0.774993	1.48654
2310069B03Rik	0	0.0912367	0.0257934	0.0320037	0	0
2310069G16Rik	0	0	0	0.158864	0.646481	1.0436
2410002F23Rik	19.5056	15.5463	26.5711	29.8943	19.9104	19.6342
2410003L11Rik	44.9823	36.3869	33.3741	33.565	36.5682	37.9163
2410004B18Rik	35.7438	32.8715	30.1308	34.5409	35.8562	43.0017
2410004I01Rik	1.80739	1.53848	2.41323	1.60159	0.325669	0.286474
2410004N09Rik	117.901	104.33	150.199	185.071	85.9852	89.0029
2410004P03Rik	0.455593	0.406005	0.473919	0.43563	0.397238	0.091895
2410006H16Rik	270.365	271.987	380.574	700.812	286.646	412.922
2410007B07Rik	50.0839	47.2338	46.4952	46.8968	27.5712	50.1157
2410012M07Rik	5.15671	3.96471	5.08296	4.52795	3.2975	3.01595
2410015M20Rik	132.997	143.363	154.465	176.841	99.4957	122.816
2410016O06Rik	28.886	38.2479	15.6835	14.4793	26.8599	27.5185
2410017I17Rik	0	0	0.0321286	0	0	0
2410021H03Rik	0.579505	0.601492	0.755764	1.68792	0.613989	0.771562
2410076I21Rik	17.2168	8.61141	33.9902	44.8677	3.45534	4.74919
2410088K16Rik	3.11543	0.552757	3.28165	4.84736	2.72045	1.06357
2410089E03Rik	1.87685	1.72079	2.30084	2.00951	2.81235	2.97782
2410114N07Rik	0	0.0996579	0.225393	0.489407	0	0
2410124H12Rik	1.67956	1.78799	2.27466	0.940776	0.58665	0.430037
2410127L17Rik	2.55295	1.60952	1.57594	1.10162	1.15923	0.90641
2410131K14Rik	7.30106	7.84871	5.32196	6.89869	12.4715	14.0893
2410137M14Rik	2.73636	1.57788	2.42158	4.74414	0.0739589	0.650577
2410141K09Rik	16.9633	11.7429	23.7543	21.0526	9.1465	12.6713
2500004C02Rik	0.265912	0.197144	0.247707	0.276613	0.229988	0.295033
2510002D24Rik	6.45783	11.2799	9.03525	13.1383	9.11014	8.69544
2510003E04Rik	17.5239	20.2751	10.373	15.2106	13.3906	18.9081
2510009E07Rik	0.103625	0.0373459	0.126696	0.178161	0.490137	0.172459
2510039O18Rik	26.8697	30.1663	18.8816	18.5693	34.7769	32.3813
2510049J12Rik	0.0275407	0.0317618	0.0359173	0.0668478	0.0625275	0.213897
2610001J05Rik	12.0751	10.3515	12.7557	11.9516	12.2453	10.8519
2610002J02Rik	21.0649	28.492	14.9809	14.8572	20.4948	18.5947
2610002M06Rik	1.72084	1.97144	2.06589	2.07461	2.69949	2.90819
2610005L07Rik	0.205291	0.205113	0.687796	0.71051	0.32921	0.117223
2610008E11Rik	0.59071	0.865368	0.978587	0.865443	3.32262	2.42675
2610015P09Rik	5.71879	4.40764	6.0811	5.57956	3.45102	3.7946
2610016A17Rik	0	0	0.31489	0	0	0
2610018G03Rik	4.18452	2.49543	8.44244	7.34996	11.774	9.68238
2610020C07Rik	0.256473	0.328801	1.25772	0.765192	0.328353	0.0801036
2610020H08Rik	1.13035	1.82288	3.12333	4.00617	1.08147	1.57672
2610027K06Rik	0	0	0	0.0257374	0.0246187	0
2610028E06Rik	0.0384985	0.110998	0.012552	0.0778708	0.0145676	0.0640719
2610028H24Rik	0.102768	0.0312781	0.0649224	0.126347	0.043783	0.0700129
2610034B18Rik	2.50164	6.40709	2.62697	2.73375	3.24552	3.31631
2610034M16Rik	0.0161866	0.00933371	0	0.0523848	0.0122498	0.0179592
2610035D17Rik	0.626331	0.812618	0.76578	0.791799	0.3555	0.173731
2610035F20Rik	1.15988	0.393427	1.24572	2.53929	5.73142	12.1877
2610037D02Rik	0	0.0108144	0.0856051	0.136564	0.0141931	0
2610044O15Rik8	1.65675	1.50466	3.29501	2.02497	1.41054	1.74628
2610100L16Rik	0.0555854	0	0	0	0	0
2610203C20Rik	0.0270875	0.0156196	0.176631	0.0219159	0.081998	0
2610203C22Rik	0	0	0.161484	0.0500911	0	0
2610206C17Rik	0.0425443	0.171727	0.110969	0.137687	0.321971	0.472035
2610301B20Rik	8.6718	8.23718	7.03548	7.75042	8.90292	7.79413
2610305D13Rik	19.8076	12.1769	25.0316	19.4253	5.88457	8.86941
2610306M01Rik	0.544102	0.851601	0.96302	0.754666	0.647068	0.776171
2610307P16Rik	0.0872185	0.0483901	0.186258	0.0235173	0.320215	0.124144
2610316D01Rik	0	0	0	0	0	0
2610318N02Rik	29.7343	23.4793	20.2992	20.5715	9.00104	15.2161
2610507B11Rik	39.9366	43.4994	38.3596	34.9895	50.3278	50.7977
2610507I01Rik	0.0714092	0.0274513	0.279386	0.192586	0.0180139	0.105639
2610524H06Rik	20.2112	18.5366	22.8933	24.8811	12.7244	16.8184
2610528A11Rik	0	0.405386	0.152808	0.0948001	0	0
2610528J11Rik	6.2662	7.90737	5.15197	5.51071	4.39855	4.53419
2700029M09Rik	58.2761	51.2603	62.6901	63.9854	47.6409	56.1101
2700038G22Rik	2.75225	2.23481	5.34574	4.58993	2.59296	2.51346
2700046A07Rik	0.0333497	0	0	0.0539651	0.0504774	0.0370019
2700046G09Rik	0.224004	0.129169	0.116855	0.14499	0.101714	0.149121
2700049A03Rik	10.0374	9.80832	9.72875	9.7442	5.56999	4.9998
2700054A10Rik	0.0641918	0.138812	0.0837173	0.100367	0.109307	0.142448
2700060E02Rik	70.7732	53.2165	63.5844	64.885	45.8252	50.8459
2700062C07Rik	14.1031	13.479	11.9908	11.3475	9.25785	8.47216
2700070H01Rik	0.0417421	0	0.0544381	0.0675452	0	0
2700081O15Rik	3.11511	3.01961	2.74925	2.74851	5.01981	4.91623
2700089E24Rik	3.46685	6.0758	3.07519	2.84301	5.72396	8.15351
2700094K13Rik	428.523	432.072	329.073	357.731	354.901	356.59
2700097O09Rik	16.1045	12.2747	21.7307	19.9574	8.69435	9.6885
2700099C18Rik	3.90095	3.84637	10.037	10.9244	3.99888	3.99616
2810001G20Rik	5.00307	4.43426	7.8539	7.34615	2.45406	5.03699
2810002D19Rik	1.81414	1.56914	2.82596	2.32399	1.25851	1.06232
2810004N23Rik	108.934	99.9301	100.631	90.6581	103.381	105.513
2810006K23Rik	11.4966	12.3814	11.7862	11.5718	6.93508	8.34054
2810008D09Rik	5.73354	9.0683	30.5506	40.6896	5.33087	2.54457
2810013P06Rik	2.39862	1.52551	3.47319	3.11079	0.747456	1.36979
2810021J22Rik	2.49436	2.06266	2.67213	3.3266	2.88342	3.66469
2810025M15Rik	154.808	124.705	113.693	134.482	76.4048	94.7923
2810029C07Rik	0.220614	0.508853	0.815191	0.684227	0.194784	0.203978
2810032G03Rik	0.122289	0.105774	0.039871	0.0494708	0.0925472	0
2810047C21Rik1	0	0	0	0.0361717	0	0
2810403A07Rik	18.7001	14.5234	23.9829	24.044	15.005	15.9757
2810403D21Rik	0	0.139357	0.0525298	0.325888	0	0.178759
2810408A11Rik	3.4158	3.25753	4.48329	5.88162	1.09367	1.02035
2810408I11Rik	31.2789	28.5211	42.3678	37.652	21.6508	27.5095
2810408M09Rik	13.6906	13.3581	10.5413	8.63613	13.9609	15.3615
2810410L24Rik	0.856563	1.13602	1.8432	2.70281	0.421355	0.807813
2810417H13Rik	43.6037	55.3324	47.9326	47.7218	35.1393	36.4149
2810428I15Rik	108.833	104.155	79.7334	88.0544	106.824	135.826
2810429I04Rik	1.19235	0.589327	2.22144	0.964704	0.386724	0.566968
2810433D01Rik	0	0.065756	0.0371796	0.0461314	0.04315	0
2810442I21Rik	0.0810083	0.412242	0.60962	0.616603	0.168059	0.31728
2810454H06Rik	0.0735923	0.0282905	0.111972	0.119084	0.0742584	0.0816515
2810459M11Rik	0.102879	0.130449	0.0536423	0.0499183	0.311281	0.844363
2810468N07Rik	1.57549	2.01164	1.35756	1.86652	0.766487	0.686724
2810474O19Rik	23.1854	18.6721	20.964	15.432	19.2816	19.5919
2900005J15Rik	0.0703544	0.0202844	0.298197	0	0.0532435	0
2900008C10Rik	0.445841	0.353495	0.218051	0.270541	1.05455	0.803835
2900009J06Rik	2.48268	2.74874	5.22553	6.49241	2.4683	0.835089
2900011O08Rik	7.29587	14.1507	8.48697	4.93895	18.0168	18.8544
2900026A02Rik	3.04443	3.58336	2.52797	2.3248	7.32617	4.84535
2900041M22Rik	6.27319	3.68251	8.54973	11.4313	0.641551	1.37949
2900052N01Rik	0	0.0622942	0.0528333	0.0437027	0	0
2900055J20Rik	0	0	0	0	0.18762	0.137533
2900056M20Rik	0.649884	0.878303	1.5637	1.33557	0.815709	0.879334
2900057B20Rik	0	0	0.0518146	0	0	0
2900060B14Rik	0.495464	0.285793	0.646077	0.267339	0.624822	0.366562
2900076A07Rik	2.08722	1.3755	3.30536	2.73413	1.27871	1.10276
2900092D14Rik	0	0	0.0158987	0	0	0
2900097C17Rik	4.28061	4.35498	3.72468	3.78321	5.1791	5.92917
3000002C10Rik	1.98005	2.04134	1.09552	1.1651	2.27043	1.9306
3010001F23Rik	0.0954034	0.110026	0.188439	0	0.288801	0.211702
3010026O09Rik	17.9107	18.9875	21.3818	30.1527	11.2086	11.0061
3110001I22Rik	4.98773	2.79693	5.46042	4.92404	3.60157	4.16315
3110002H16Rik	10.9552	9.16174	14.6446	13.9464	7.37748	8.76835
3110009E18Rik	18.5089	17.653	15.7045	12.3914	14.0073	17.1075
3110009F21Rik	0.0908702	0	0	0	0	0
3110021A11Rik	0	0.420731	0.679681	0.421664	0.473295	0.346944
3110021N24Rik	0.893837	1.10781	0.548078	0.45336	1.12073	1.06578
3110035E14Rik	0	0	0	0	0	0
3110040N11Rik	18.7971	20.5371	24.7724	22.2522	13.1024	9.87897
3110043O21Rik	5.32467	5.11318	7.29419	7.69547	3.9809	4.33555
3110045C21Rik	0.277035	0.159748	0.587108	0.392251	0.209657	0.153687
3110052M02Rik	0.20066	0.115707	0.332147	0.474561	0.443891	0.291138
3110056K07Rik	0.820483	1.08009	2.29334	2.58467	0.620932	1.21378
3110057O12Rik	0.899439	1.03729	1.94279	1.36447	0.489243	0.623712
3110062M04Rik	0.983641	1.75364	1.86528	1.70433	2.11593	1.54866
3110070M22Rik	0	0.0402409	0.0910116	0	0	0.0774283
3110079O15Rik	1.01146	0.14581	0.329774	0.409174	0.191365	0
3110082I17Rik	68.4533	72.8882	66.8216	73.7487	59.1333	75.2676
3110082J24Rik	0	0.146868	0.198101	0.371737	0	0
3200001D21Rik	0.154694	0.249764	0.201744	0.0750956	0.0702422	0.102981
3300002I08Rik	0.291878	0.336614	1.23713	1.18076	0.662671	0.809606
3300005D01Rik	0	0.0652998	0	0	0	0
3425401B19Rik	0.0360715	0	0.00784047	0.0291847	0	0
3632451O06Rik	7.68343	10.2602	11.8168	10.9811	3.63421	4.26243
3632454L22Rik	0.0387659	0.0335258	0	0.0156775	0.014664	0.0215008
3830403N18Rik	0	0	0	0	0.0598388	0
3830406C13Rik	1.85146	1.28393	2.51443	2.4492	1.00453	1.13406
3830408C21Rik	0.265912	0.284763	0.817435	0.583962	0.229988	0.16859
3830417A13Rik	0.222761	2.49196	0.0871543	0	23.0284	2.61985
3930402G23Rik	0.0243262	0.0981913	0.0475878	0.0196818	0.128869	0.107961
4430402I18Rik	0	0.200862	0.168934	0.197928	0.0284581	0.155008
4631405J19Rik	0	0	0.0409235	0.0507767	0	0
4632415L05Rik	1.47917	1.82908	1.41465	1.60898	1.97764	2.26115
4632427E13Rik	0.696446	0.240957	1.36241	1.12696	0.105413	0.772716
4632428C04Rik	0.115671	0.0667	0.245136	0.374349	0	0
4632428N05Rik	0.470599	0.207589	0.496588	0.683368	0.199092	0.138261
4632434I11Rik	8.25976	7.05862	10.4749	7.93281	7.79488	7.86768
4732416N19Rik	0.271042	0.291643	0.150584	0.198684	0.276002	0
4732456N10Rik	0	0	0.0179973	0.0223305	0.334197	0.12249
4732471J01Rik	0.181024	0.294353	0.417118	0.623538	0.23809	0.456983
4732491K20Rik	0.151509	0.049923	0.15525	0.0350237	0.212941	0.168101
4831440E17Rik	0.0861879	0.0331326	0.449609	0.511374	0.010871	0.0478133
4833403I15Rik	0.0213207	0	0.0695136	0.0345002	0.0161353	0
4833411C07Rik	0	0	0	0	0.0488809	0
4833412C05Rik	0	0	0	0	1.22165	0.325644
4833417C18Rik	1.73361	1.09963	3.39135	3.41306	0.612257	0.641155
4833418N02Rik	0.0485629	0	0.0633336	0.0392912	0.0367519	0.0538812
4833419F23Rik	0	0.165038	0.186631	0.0771888	0.505402	0.211702
4833420G17Rik	6.05072	4.80331	8.8288	6.95909	4.43538	4.18455
4833422C13Rik	0	0	0	0	0.0293388	0.0440024
4833423E24Rik	0	0	0	0	0.0328947	0
4833424O15Rik	0	0	0	0	0.012665	0
4833427G06Rik	0	0	0	0	0.0857012	0
4833428L15Rik	0	0	0.0398331	0	0	0.0677762
4833439L19Rik	61.0954	44.7626	53.837	42.1973	48.3974	43.9594
4921504A21Rik	0	0	0	0	0.130597	0.268059
4921506M07Rik	0	0	0	0	0.0382268	0
4921507L20Rik	0.0478391	0.0551713	0.124779	0.0774112	0.0362041	0
4921507P07Rik	0.181179	0.383071	0.315047	0.219882	1.21118	0.938095
4921509C19Rik	0.0259487	0	0	0	0	0
4921511C10Rik	0	0	0	0	0	0
4921511I17Rik	0	0.0330716	0	0	0	0
4921517D22Rik	0.087521	0.0757013	0.128408	0.0708113	0.0165587	0
4921524J17Rik	17.3577	15.8275	13.7029	12.0214	6.72565	8.26829
4921525O09Rik	0.104759	0.0120816	0.191271	0.10171	0	0
4921530L21Rik	0	0	0.0883231	0.0547944	0.0512531	0.0751411
4921531C22Rik	0.264815	0.349032	0.444034	0.397905	0.200409	0.251842
4921533I20Rik	0.162133	0.0934912	0.105723	0	0.0613501	0
4921536K21Rik	0.532757	0.53761	0.729538	0.581908	0.5443	0.531991
4921539E11Rik	0.0298951	0	0.0194916	0	0	0
4922502N22Rik	0	0	0	0.0552021	0	0
4930402F06Rik	0.297499	0	0	0	0	0
4930402H24Rik	2.27384	2.0214	3.20374	4.34743	2.85779	2.86825
4930404A10Rik	0.0539503	0	0	0.0436501	0	0
4930404I05Rik	0	0.0480814	0.326233	0.134927	0.0631033	0.0925144
4930404N11Rik	6.98809	7.90708	3.69701	3.94707	14.7679	15.0679
4930405A21Rik	0	0.282256	0.265987	0.396035	0.55566	0.633611
4930405J17Rik	0	0	0	0.123809	0	0
4930407I10Rik	0	0.00829056	0	0	0	0
4930412C18Rik	0.0170689	0.0590549	0.0111302	0.0138101	0	0
4930412O13Rik	0	0.00966263	0	0	0.0634074	0
4930413F20Rik	0	0.0416913	0.0471459	0	0.384097	0.240657
4930413G21Rik	5.32319	5.58097	5.64497	4.82893	9.52198	9.00836
4930414L22Rik	0.356419	0.515712	0.471525	0.765129	0.403207	0.342861
4930414N06Rik	0	0	0.226761	0.143763	0.136783	0
4930415F15Rik	0	0	0	0.095322	0	0.130718
4930415O20Rik	0.538137	0.827488	0.818783	0.580527	0.135752	0
4930417O13Rik	0.145092	0	0.0946115	0.0586956	0	0
4930426D05Rik	0.0454351	0.0261994	0	0.0661928	0.0882875	0.247203
4930426L09Rik	0	0	0	0.0406441	0	0.0557364
4930427A07Rik	11.24	14.3743	12.0914	11.2561	13.0296	10.5697
4930429B21Rik	1.13269	1.47318	1.06791	0.744395	2.02221	2.95662
4930429F24Rik	0.0489331	0	0	0	0	0.108584
4930430F08Rik	8.65299	7.02119	9.64426	9.23533	4.19844	4.39677
4930430J02Rik	0	0.15432	0	0	0	0
4930432K21Rik	2.44251	1.74893	3.36945	4.22164	0.531329	0.816456
4930433N12Rik	0.109371	0.315336	0.748845	0.884901	0.165542	0.242698
4930442L01Rik	0	0.0200862	0.0228637	0	0	0
4930444F02Rik	0	0	0.0524596	0	0.0508295	0
4930444G20Rik	0.205372	0.118424	0.321404	0.132929	0	0
4930444M15Rik	4.82604	4.3913	2.77163	2.57922	1.13925	0.589492
4930444P10Rik	0	0	0.16452	0.102066	0.286408	0.139965
4930447C04Rik	2.48949	1.91403	6.22281	4.15046	2.19802	1.46476
4930447K03Rik	0	0.179502	0.101493	0.0629651	0	0
4930448H16Rik	0	0.093507	0	0	0.122721	0
4930449E01Rik	0.163398	0	0.106548	0.264404	0	0.181293
4930451C15Rik	0	0.096047	0.065166	0.754725	0	0
4930451G09Rik	0.112235	0.0431453	0.0487904	0.211635	0.140459	0.248727
4930451I11Rik	0	0	0	0	0.182043	0
4930452B06Rik	6.03346	7.75883	6.50227	5.63727	2.63647	2.49282
4930453H23Rik	0.042488	0.0245	0.0554109	0	0.128618	0
4930453L07Rik	0	0.0300733	0	0	0	0
4930453N24Rik	27.7272	19.5488	23.8958	24.7925	23.8824	25.5624
4930455B14Rik	0	0.0832887	0.0941857	0.116863	0	0
4930455C13Rik	0	0.0796543	0.263667	0.111264	0	0.321813
4930461G14Rik	8.64348	8.2853	14.7127	14.8947	3.31312	3.2382
4930463O16Rik	0	0	0	0.0244889	0	0
4930465K10Rik	1.03551	0.702485	0.714954	0.887095	1.84392	1.48683
4930467D21Rik	0.0921375	0.0132824	0.120161	0.0931831	0	0.0255569
4930467K11Rik	0.12468	0.215685	0	0	0.0943567	0
4930469G21Rik	0	0.0496285	0.0561216	0.208902	0.0651338	0.0954913
4930470P17Rik	0.0540867	0	0.0705374	0	0.0409322	0
4930473A02Rik	0	0	0.109103	0.0457965	0	0
4930474N09Rik	0	0	0.043249	0.0536621	0	0.0735884
4930478L05Rik	0	0	0.0250374	0	0	0.0426013
4930479D17Rik	0	0	0	0	0	0
4930480G23Rik	0	0	0	0.0494238	0	0
4930481A15Rik	0.300852	0.0693925	0.0784714	0.19473	0.0496519	0
4930483J18Rik	0	0.0835708	0.0945047	0.117259	0	0
4930483K19Rik	0.345194	0.42478	0.78563	1.082	0.667397	0.61435
4930483O08Rik	0	0	0	0	0	0
4930486I03Rik	0	0	0	0	0.16814	0
4930486L24Rik	0.440866	0.381327	0.539022	0.71339	0.250232	0.366859
4930487H11Rik	0.18692	0	0.365654	0.075689	0.0710431	0
4930500J02Rik	14.362	18.7906	45.1368	31.7516	6.86219	5.90162
4930502E09Rik	0	0	0.306175	0.28492	0.0888354	0
4930502E18Rik	0.322625	0.0372073	1.43056	2.29705	0.146495	0.644321
4930503B20Rik	0	0	0	0.0644496	0	0.176763
4930503E24Rik	11.9272	12.8338	13.0616	14.0364	9.89013	9.75089
4930503L19Rik	4.6538	3.44773	6.75257	5.88485	3.52195	3.93243
4930504O13Rik	0	0	0	0	0	0
4930505A04Rik	0.0895477	0.103272	0.175176	0.289804	0	0.0993542
4930506C21Rik	0.167418	0	0.163754	0	0.0633501	0.0928763
4930506M07Rik	1.32602	1.38589	2.51834	3.6343	4.30258	1.91261
4930507D05Rik	0.715447	0.561472	0.295654	0.263227	0.29642	0.71089
4930509E16Rik	0.914379	0.790892	0.894368	0.686961	0.098856	0.217396
4930511M06Rik	0.0262744	0.0151492	0.0171317	0.0637795	0	0
4930512B01Rik	0	0.0337341	0	0.0945145	0.0426396	0
4930513N10Rik	0.836944	1.06478	1.18682	1.39049	1.15783	0.952929
4930515B02Rik	0	0	0.108763	0	0	0
4930515G01Rik	0.184665	0.141979	0.200693	0.249014	0.232921	0.341481
4930519F09Rik	4.36964	3.26728	2.34836	2.52527	3.45226	2.61055
4930519F16Rik	0.26807	0.386445	0.349604	0.379556	0	0
4930519G04Rik	0	0.0201958	0	0.0283369	0.0530111	0
4930520O04Rik	0.362302	0.183453	0.501561	0.76237	0.0963083	0.494302
4930523C07Rik	0.0196422	0.0339792	0.102983	0.0319447	0.504922	0.217932
4930524B15Rik	0.0733279	0.0422834	0.0717232	0.177984	0.0554938	0.122037
4930524O05Rik	0	0	0.109046	0	0	0
4930525D18Rik	0.0881944	0	0	0	0	0
4930525G20Rik	0.0231007	0.0266413	0.0602537	0.0373805	0.0349647	0.0256305
4930526L06Rik	2.13487	1.82376	1.80457	2.94277	1.19678	2.98276
4930528A17Rik	0.136845	0.0785811	0.266256	0.274798	0.180263	0.0754804
4930528D03Rik	0.124543	0	0.0406059	0.151148	0.0471265	0
4930529C04Rik	0.0193188	0	0	0	0	0.0214344
4930529M08Rik	0.189801	0.136807	0.154706	0.345518	0	0.210586
4930533B01Rik	0	0.0450951	0	0.0632746	0	0
4930538K18Rik	0	0.257084	0.290719	0.320637	0.187446	0.164887
4930539E08Rik	0.951372	0.683632	0.954412	1.07763	0.398763	0.194872
4930539J05Rik	38.0007	35.8801	32.8943	29.8466	41.7083	45.121
4930539M17Rik	0	0	0	0.243509	0.227771	0.11131
4930543E12Rik	0	0	0.0686855	0	0	0
4930544D05Rik	0	0	0.094094	0.116749	0	0
4930545H06Rik	0	0	0	0	0	0
4930546C10Rik	0	0	0	0	0	0.0336936
4930546K05Rik	0.0385447	0.0111131	0.0377012	0.0467786	0.0145851	0.0213829
4930547E08Rik	0	0	0.251508	0.312064	0	0.213971
4930548H24Rik	4.31867	4.16061	8.62004	10.1415	0.797152	1.40243
4930549C01Rik	0	0	0.0906307	0	0	0
4930549G23Rik	0	0.120743	1.11966	0.351824	0.154724	0.236609
4930550C14Rik	0.623927	0.46771	0.528903	0.656247	0.613835	0.415353
4930550L24Rik	0.0470674	0	0.0613832	0.0380813	0	0
4930552P12Rik	0.084175	0.0485381	0.219554	0.136208	0.0424685	0
4930556C24Rik	0	0	0	0.0743172	0	0.203826
4930556G01Rik	0	0	0	0.0760585	0	0
4930556M19Rik	0.680296	0.460094	0.490301	0.436274	0.522548	0.508231
4930557J02Rik	0	0	0	0	0.0560422	0.00400401
4930558C23Rik	0	0	0	0.0987661	0	0.135441
4930558J18Rik	3.09851	1.68633	4.22255	4.90121	1.34372	1.58372
4930558K02Rik	0	0.0479426	0.0542312	0	0	0
4930562C15Rik	0	0	0	0.028688	0.013417	0
4930562F07Rik	0.0968136	0.100165	0.0761184	0.188903	0.0208747	0.167542
4930563D23Rik	0	0.0149811	0.0169411	0	0.0786462	0.0864762
4930563E22Rik	0.0621781	0.107635	0.446876	0.403146	0.0630229	0.0231892
4930565N06Rik	0.029075	0.0335312	0.265428	0.188192	0.0440073	0
4930571K23Rik	0	0.0380656	0	0	0	0
4930577N17Rik	0.297048	0.3692	0.357514	0	0.435152	0.511428
4930578M01Rik	0	0	0.119792	0	0	0
4930579G18Rik	0.414569	0.507031	1.04273	1.50423	0.508416	0.343926
4930579G24Rik	5.76001	5.78094	5.65773	5.42719	4.85572	4.89422
4930579K19Rik	0.204034	0.588265	0.487836	0	0.102941	0.150919
4930581F22Rik	0.0585211	0.202471	0.248279	0.402795	0.0666781	0
4930590J08Rik	0	0	0.0131349	0.0325949	0.0152442	0
4930591A17Rik	0.731044	0.0702574	2.86018	2.56304	0	0.270367
4930592I03Rik	0	0	0.0537438	0	0	0
4930594C11Rik	1.0334	0.915645	1.34772	1.01964	1.08727	1.34233
4930598F16Rik	0	0	0	0	0	0
4930599N23Rik	2.38229	1.28462	2.13821	1.26221	1.51531	0.922764
4931403G20Rik	0	0.0494541	0	0	0	0
4931406B18Rik	0.0341286	0	0.0667635	0.0276128	0	0
4931406C07Rik	12.0575	11.739	12.8371	12.3956	7.77534	8.41519
4931406H21Rik	0	0	0.0114687	0.0284601	0.0133104	0.0195141
4931406P16Rik	9.91587	5.15596	11.7433	11.3524	17.3421	13.0877
4931408D14Rik	0.0225379	0.0129948	0.0293938	0.0729466	0	0
4931409K22Rik	0.0260742	0.0902141	0.0709033	0.0527854	0	0
4931414P19Rik	6.13075	8.05153	5.00155	5.41914	3.94475	4.61467
4931419H13Rik	0	0	0	0	0	0
4931423N10Rik	0	0	0	0.0317883	0.0297338	0
4931428F04Rik	1.95779	2.55485	2.4827	2.00596	3.46255	3.12039
4931428L18Rik	0	0	0	0	0	0
4931429I11Rik	0	0	0.0146368	0.0726436	0.0339744	0
4931429L15Rik	0	0	0.0228881	0	0	0
4931431C16Rik	0.0784855	0.0894065	0.0843769	0.10417	0.0599521	0.0286736
4931440F15Rik	0	0.0363679	0	0.0677874	0.0316916	0.116156
4931440J10Rik	0	0	0	0	0	0
4931440L10Rik	0.640702	0.29623	0.979969	1.07176	0.0636312	0.17109
4931440P22Rik	0.844198	0.950378	0.904022	1.1733	0.55417	0.931507
4932411N23Rik	0.0200865	0	0	0.0162515	0	0
4932412D23Rik	0.0164732	0	0.0537089	0.0266562	0	0
4932416H05Rik	0.760073	0.976628	0.976547	0.86788	0.759591	0.66481
4932418E24Rik	0.021843	0.0125954	0.0569733	0	0	0.0484702
4932435O22Rik	0	0	0	0	0.0152107	0
4932438A13Rik	1.23679	1.35786	1.70376	1.71636	2.38646	2.281
4932438H23Rik	0	0.0166129	0	0	0	0
4932441J04Rik	0	0	0	0	0.0938101	0
4932702P03Rik	0	0	0	0	0	1.2247
4933400F21Rik	0	0.0217559	0	0	0	0.0209305
4933401D09Rik	0	0.033143	0	0	0.0434977	0.063771
4933402D24Rik	0.0414724	0.0478288	0	0	0.251087	0.138042
4933402E13Rik	2.49639	6.6183	1.75815	0.994808	4.2737	4.87814
4933402P03Rik	0	0	0.0297535	0	0	0
4933404O12Rik	10.5287	9.28883	8.045	7.42783	10.7704	10.8865
4933405D12Rik	0	0.132233	0.299066	0.371073	0.0867727	0.127216
4933405L10Rik	0.140181	0.525417	0.319932	0.283544	0.212175	0.155533
4933406C10Rik	0	0	0.0293777	0.145804	0.0340952	0.0499862
4933406J08Rik	1.04579	0.233435	1.89183	2.51109	0.306366	0.524016
4933406J10Rik	0	0	0	0.0668555	0.125069	0
4933406M09Rik	0.123302	0	0.0268008	0	0	0
4933407E24Rik	0	0	0	0	0.0291802	0.0427804
4933407K13Rik	0.263432	0.175274	0.422838	0.377089	0.368054	0.0899327
4933408B17Rik	0	0.017186	0.116607	0.144682	0.0451106	0
4933408J17Rik	0.234091	0.158013	0.203363	0.284571	0.117986	0.259207
4933408N05Rik	0.0934497	0	0	0	0.0353609	0
4933411E08Rik	0.0429141	0	0.0279833	0.0347209	0.0649538	0
4933411G11Rik	0	0	0.0214678	0.0532731	0.0249151	0
4933411K16Rik	0.0538147	0.0310314	0.0701826	0.0870806	0.122179	0.119416
4933411K20Rik	3.33252	4.3237	3.72525	2.63609	2.82601	2.57503
4933412E12Rik	3.25189	2.03693	1.80921	1.55461	3.71667	2.37848
4933413G19Rik	0	0	0	0.0596089	0.0550688	0
4933413J09Rik	0.0201939	0	0	0	0.0152825	0.0448108
4933416C03Rik	0.0313773	0.0542798	0.286446	0.507734	0	0.0696271
4933416I08Rik	0.000317861	0.000312941	0.000314328	0	0.000309635	0
4933416M07Rik	0.781006	0.800135	1.58495	0.648615	0.344487	0.831201
4933417D19Rik	0.0628816	0	0.123011	0.152628	0.142764	0.139536
4933417G07Rik	1.27899	0.934175	0.611598	1.31075	1.48415	0.946034
4933421O10Rik	0.141013	0.264266	0.172408	0.171136	0.373509	0.293354
4933422A05Rik	0	0	0	0	0.042323	0
4933422H20Rik	0	0.0858912	0.0485644	0.180772	0.0281815	0.0413163
4933424G06Rik	0	0.0402847	0	0	0	0
4933426M11Rik	10.6323	15.4509	9.38672	11.3651	17.5318	14.8275
4933427D06Rik	0.266047	0.0460236	2.23794	3.35795	0.221476	0.17711
4933427D14Rik	1.33871	1.49901	2.22296	2.61964	2.27363	2.19343
4933427E11Rik	0	0	0.0416151	0	0.0482978	0.283233
4933427G17Rik	0	0	0.0499852	0	0.029006	0
4933428C19Rik	0	0.0606957	0.137274	0	0.0796586	0
4933428G20Rik	0.0598253	0.167167	0.191055	0.192251	0.224395	0.135466
4933429K18Rik	0	0	0.103758	0	0.0602096	0
4933430I17Rik	0.122284	0.423079	0.531591	0.39575	0.123391	0.0452252
4933431E20Rik	0.703302	0.397441	1.42303	1.10278	0.703657	0.877382
4933432G23Rik	0	0	0.133126	0.0825895	0.0772519	0
4933432I03Rik	0.0752682	0.0434022	0	0.0608979	0	0
4933433C11Rik	0.630449	0.605897	0.616652	0.255041	0.159039	0.174873
4933433G08Rik	0	0	0.0255572	0	0	0
4933433G15Rik	0.135879	0.0783524	0.443018	1.26427	0.102832	0
4933433G19Rik	0	0	0.108692	0.0648473	0	0
4933434E20Rik	9.56151	7.26593	9.68077	10.9932	8.95656	9.40136
4933434I20Rik	0	0	0.0772406	0.047919	0	0
4933439C10Rik	0.206144	0.232274	1.69882	1.42211	0.876611	0.132724
4933439K11Rik	0.0875927	0.202036	0.228469	0.141739	0.596602	0.777481
4933440M02Rik	0.13119	0.176516	0.0855431	0.070758	0.0330883	0
5031410I06Rik	0	0.0135152	0	0	0	0.0520096
5031414D18Rik	0.157668	0.0606112	0.0514059	0.106305	0.0198869	0.0291558
5031425E22Rik	1.20816	1.44083	1.79049	1.88835	1.49617	1.4014
5031434C07Rik	0.0337863	0.0194639	0	0.082132	0	0
5031434O11Rik	0.125903	0	0.164197	0.101865	0	0
5031439G07Rik	9.99395	11.5564	9.44983	9.00107	23.4654	18.2346
5033404E19Rik	0.256331	0.0739045	0.501442	1.24435	0.0969941	0.142201
5033406O09Rik	0.92859	0.778846	0.935792	0.922053	0.223601	0.421479
5133400J02Rik	2.73027	1.01572	6.20251	6.91205	3.06604	2.34524
5330411J11Rik	0.715317	0.567154	0.932883	1.48304	0.033834	0
5330413P13Rik	0.0937718	0.0324432	0.134522	0.106216	0	0.0208082
5330417C22Rik	0.144123	0.142468	0.147682	0.166581	0.0155815	0.0685312
5330426P16Rik	0.924213	1.07102	1.37575	2.00399	0.87677	0.443246
5330439B14Rik	0	0	0	0	0.0328444	0
5430402O13Rik	0	0.0505696	0	0	0.0663713	0.0973092
5430403N17Rik	0	0	0	0	0	0
5430405H02Rik	0.93862	0.566662	0.592742	0.619658	0.398842	0.733143
5430416N02Rik	23.8115	16.6538	27.1471	31.9432	35.8081	28.2941
5430416O09Rik	0	0	0	0.0267868	0	0
5430417L22Rik	0.882196	0.978277	0.944016	1.28112	0.736112	0.778026
5430428K19Rik	0	0	0	0	0	0
5430435G22Rik	0.110924	0.0319813	0.108497	0.358986	0.67157	0.15384
5430440P10Rik	0	0	0	0.06429	0.0601351	0
5530601H04Rik	0.783324	0.504213	1.29479	1.56232	0.730674	0.747837
5730403I07Rik	0	0	0	0	0	0.0390724
5730405O15Rik	0.661921	1.79938	1.29487	2.21869	0.286248	1.15407
5730408K05Rik	8.02166	9.67162	18.0698	20.9455	13.7971	10.1138
5730409E04Rik	1.77368	2.68511	1.26744	1.61059	2.11073	2.17961
5730416F02Rik	0.318914	1.16468	0.623869	1.20412	0.643601	1.41535
5730420D15Rik	0	0	0.132181	0	0.306847	0.074955
5730422E09Rik	0.0426008	0.0491301	0.111116	0.103402	0.225679	0.0472661
5730435O14Rik	0	0	0	0	0.118819	0
5730455P16Rik	3.32251	3.31857	5.05847	4.05626	2.77262	1.97484
5730457N03Rik	0	0.0136699	0.0154584	0	2.84227	2.1305
5730460C07Rik	0	0	0	0.0319447	0	0
5730480H06Rik	0.0840857	0.0727301	1.09661	0.986462	0.349993	0.233235
5730488B01Rik	0	0	0.0398116	0	0	0
5730507C01Rik	0.0567538	0.0654534	0.0184981	0.0918414	0.0429487	0
5730508B09Rik	0.460214	0.875737	0.840266	1.00534	0.626913	0.663797
5730559C18Rik	13.7548	16.7208	11.3272	10.5547	24.716	20.8476
5830403L16Rik	0	0	0	0	0	0
5830411N06Rik	0	0	0	0.0186617	0	0
5830415F09Rik	11.7938	15.137	12.2799	12.6972	10.401	12.2411
5830416I19Rik	0	0	0	0	0	0
5830416P10Rik	0	0.00728112	0.032935	0.0408648	0	0
5830417I10Rik	2.64782	2.98442	2.23107	2.01818	3.50293	2.82679
5830418K08Rik	6.14794	5.57606	8.59057	7.99058	5.60901	5.54351
5830418P13Rik	0.0651757	0.0563738	0.191248	0.263661	0.34527	0.10847
5830428M24Rik	0	0	0.0506879	0.126126	0	0
5830444B04Rik	0	0	0.0180393	0	0	0.110634
5830454E08Rik	0.600091	0.899685	1.72175	1.45656	0.0908285	0.266323
5830473C10Rik	0.0315779	0	0	0	0	0
5930403L14Rik	0.0821662	0.135371	0.0229623	0.037988	0.00888321	0.0390705
5930412G12Rik	0.204544	0.269593	0.685946	0.874745	0.773983	0.324206
5930430L01Rik	0.248451	0.0991838	0.186934	0.0687593	0.173561	0.402627
5930438M14Rik	0	0.0165928	0	0	0	0
6030407O03Rik	0	0	0.0788376	0.0326065	0	0
6030408B16Rik	0.0364972	0.042091	0.071397	0.0590582	0.0276207	0
6030419C18Rik	1.79529	3.29738	0.628691	1.37183	1.76122	1.29104
6030443J06Rik	0.0467899	0.134903	0.355957	0.403805	0.0236067	0.051914
6030458C11Rik	16.1598	13.4882	18.033	15.3741	11.3009	13.3217
6030466F02Rik	0	0	0	0.0423682	0	0
6230400D17Rik	0.145917	0.420703	0.475746	0.885437	0.496928	0.566638
6330403A02Rik	0.121333	0.0816252	0.0263727	0.0409032	0.0688674	0.639445
6330403K07Rik	0.877552	0.958787	2.46963	1.64423	0.594214	1.43486
6330408A02Rik	2.07266	2.31052	1.60911	1.99157	3.99291	3.03575
6330409D20Rik	0	0	0.0460059	0	0.106797	0.07829
6330410L21Rik	0.280562	0.222449	0.495727	0.468359	0	0.155643
6330416G13Rik	1.95102	2.41232	1.68814	2.38298	2.45612	2.60179
6330418K02Rik	0.412477	1.00973	0.916027	0.748482	1.01151	0.612797
6330419J24Rik	2.45008	3.09779	2.44777	1.96412	3.98057	3.69104
6330549D23Rik	2.81781	2.5291	2.85999	2.63667	3.30072	3.67011
6430411K18Rik	0.000254393	0.511788	0.412385	0.573323	0.837122	1.0251
6430503K07Rik	0	0	0	0.151481	0	0
6430531B16Rik	0.404214	0.738098	0.790737	1.03563	1.22362	0.597974
6430548M08Rik	0.206561	0.0712221	0.295496	0.473925	0.155788	0.319756
6430550D23Rik	0.0468254	0.0222338	0.226286	0.124794	0.0354364	0.0519534
6430562O15Rik	0.582429	0	0.127163	0.119677	0	0
6430571L13Rik	0.164328	0.189514	0.267886	0.265908	0.186542	0.212711
6430573F11Rik	0.436728	0.503664	1.24268	0.610327	0.901393	1.71797
6430706D22Rik	20.9836	19.9224	28.8346	32.888	26.8048	28.5079
6430710C18Rik	0	0	0	0	0	0
6530402F18Rik	0	0.0271921	0	0	0.0118959	0
6530411M01Rik	0.127007	0.0366184	0	0.0513795	0	0
6720416L17Rik	0.0857491	0.0494459	0.0931918	0.0693778	0.281207	0.0317132
6720468P15Rik	0	0	0.110848	0	0	0
6720483E21Rik	0	0	0.09181	0.0569576	0	0
6720489N17Rik	1.69079	0.959734	2.60127	1.7741	1.23959	1.40697
6820408C15Rik	0	0.10023	0.236343	0.0733042	0.296026	0.201064
6820431F20Rik	2.02079	2.03722	3.80879	4.67163	2.47942	1.75525
7420426K07Rik	0	0	0	0	0	0
7420701I03Rik	0	0	0.079299	0	0	0
7530416G11Rik	0	0	0	0	0	0
8030411F24Rik	0	0	0	0	0.247316	0
8030423F21Rik	0	0	0	0.0196595	0	0.107838
8030462N17Rik	24.1786	21.8993	23.317	20.4685	18.2527	19.8813
8430408G22Rik	0	0	0	0.0469024	0	0
8430419L09Rik	4.23587	4.7278	4.27918	5.04985	1.61497	2.38548
8430423G03Rik	0	0	0	0	0	0
8430426J06Rik	0	0	0	0	0.0790055	0
8430427H17Rik	3.35943	3.69937	3.74024	3.38549	2.59027	1.15892
8430429K09Rik	1.07442	1.23605	1.768	2.09603	2.06874	1.87706
9030025P20Rik	0.167882	0.116168	0.284628	0.40749	0.279513	0.409788
9030404E10Rik	0.128276	0.147937	0.250938	0.467035	0	0
9030612E09Rik	0	0	0.0504673	0	0.0292857	0
9030617O03Rik	1.02	2.52423	1.51038	1.80527	0.0804092	0.212195
9030619P08Rik	0	0	0	0	0	0
9030624G23Rik	0.436296	0.503166	0.426748	0.42864	0.235846	0.172884
9030624J02Rik	20.4651	23.5138	17.7558	20.1808	23.9238	25.0952
9030625G05Rik	0	0	0	0.123828	0	0
9130008F23Rik	0	0.189743	0.171654	0.159738	3.61084	0.803193
9130011E15Rik	8.5978	10.3563	6.66542	8.36688	9.29015	10.0163
9130015A21Rik	0	0	0	0	0	0
9130019O22Rik	0.629716	0.857356	0.707185	0.551947	1.99891	1.97959
9130019P16Rik	0.0159565	0.0355053	0.0417679	0	0.0343316	0
9130023H24Rik	0.16231	0.281611	0.21691	0.181613	0.4896	0.848579
9130024F11Rik	0.164138	0.515303	0.0713537	0.073778	0.607287	0.161889
9130204L05Rik	0.22694	1.17775	0.443947	0.367225	0.343492	0.503586
9130221H12Rik	2.4937	2.20838	2.30527	2.47682	2.93481	3.20692
9130230L23Rik	0	0	0.134394	0.166752	0	0
9130401M01Rik	80.2665	77.1069	74.472	78.9796	70.0732	75.2509
9130409I23Rik	0	0.0219048	0	0.0307348	0.0287485	0
9230102O04Rik	0	0	0	0	0.0918589	0
9230105E05Rik	0.0314387	0	0.123003	0.0254364	0	0
9230110C19Rik	3.75736	3.20981	3.96249	4.05334	5.2307	5.19819
9230112J17Rik	0	0	0	0.024438	0	0
9230114K14Rik	0.638621	1.04661	1.66572	1.49569	1.88233	0.932313
9230116L04Rik	0.0614409	0.067067	0.0353252	0.083197	0.0827237	0
9230116N13Rik	0.625693	0.380683	1.04736	0.982122	0.420729	0.156204
9330020H09Rik	0.418672	0.321894	0.481011	0.306478	0.286671	0.309681
9330102E08Rik	0.299899	0.539141	1.20785	1.35594	0.267012	0.332742
9330133O14Rik	0.29482	0.255004	0.38449	0.377676	0.465163	0.517746
9330151L19Rik	0.0837788	0.210547	0.370905	0.596749	0.188253	0.0307665
9330159F19Rik	0.118093	0.0204289	0.0770056	0.0859918	0.0536228	0.0524102
9330159M07Rik	0.125975	0.0850345	0.147862	0.0815392	0	0.0567166
9330162012Rik	0	0.0367384	0.0396029	0.1443	0.184058	0.260009
9330175E14Rik	0	0	0.0314763	0.0390549	0.0730616	0
9330179D12Rik	0	0	0	0.0573905	0.0536814	0
9330182L06Rik	0.261489	0.343452	0.464169	0.317348	0.373797	0.33848
9330182O14Rik	0	0	0.0680687	0	0	0
9430008C03Rik	4.56949	3.88492	8.57143	9.27895	8.46158	5.93287
9430015G10Rik	8.23647	8.26873	15.099	15.453	9.51499	9.33263
9430016H08Rik	27.2633	34.5916	27.2878	30.1729	33.9521	33.9852
9430018G01Rik	0	0	0	0.0133624	0	0
9430020K01Rik	1.70255	1.8273	1.75193	1.65618	3.66432	2.88264
9430021M05Rik	0	0	0	0	0	0.0734316
9430037G07Rik	0.0648669	0	0.183292	0.0874707	0.032727	0.0239902
9430038I01Rik	12.0425	12.7981	13.9703	14.8982	9.43151	9.3218
9430041J12Rik	0.0305232	0.0366274	0.0803811	0.0764685	0	0
9430060I03Rik	0.119958	0.0651503	0.144349	0.13153	0.0804506	0
9430069I07Rik	4.37575	1.90938	4.48657	5.83379	1.20162	1.95741
9430076C15Rik	0	0	0	0	0.0344441	0.0504978
9430083A17Rik	0.253833	0.266125	0.120377	0.130691	0.174635	0.153617
9430091E24Rik	0.0838897	0.239653	0.270374	0.359393	0.380458	0.430545
9530003J23Rik	0	0	0	0	0	0
9530026F06Rik	0	0	0	0	0.0710389	0
9530026P05Rik	0	0.0470426	0.106395	0.132012	0.06174	0.0905156
9530027J09Rik	0.285607	0.228444	0.515447	0.461541	0.0864144	0.131048
9530036O11Rik	0.0236192	0	0.0154015	0	0	0.0262057
9530051G07Rik	0.0305258	0	0.0497629	0.0987911	0.0231016	0.0846719
9530053A07Rik	0.416093	0.254329	0.265898	0.444381	0.138554	0.0646324
9530059O14Rik	0	0	0.0111036	0	0.0257734	0
9530068E07Rik	14.5787	12.8311	22.645	39.5247	22.7112	26.7065
9530077C05Rik	3.35978	1.32956	4.01653	6.02295	0.722908	1.13293
9530080O11Rik	2.28161	1.99546	1.63567	1.72102	1.2087	1.64721
9530082P21Rik	3.28155	3.1078	2.40907	1.5473	8.9634	8.70444
9530091C08Rik	0	0	0	0.00668537	0	0.00916784
9630001P10Rik	0	0.0291093	0	0	0	0
9630028B13Rik	0	0	0.0130897	0	0.0151917	0
9630028H03Rik	0	0	0	0.0499434	0	0
9630033F20Rik	28.2128	20.9534	21.6413	24.5451	14.2576	14.5761
9830132P13Rik	0	0	0.0210355	0	0	0
9830147E19Rik	2.19198	1.842	2.85867	2.38987	0.971042	0.726641
9830166K06Rik	0	0	0.0165004	0.0409464	0	0
9930012K11Rik	3.90228	5.70698	3.67297	3.009	7.08655	2.88929
9930014A18Rik	0.0432462	0.0916692	0.120521	0.0716903	0.569078	0.41599
9930021J03Rik	3.81819	2.732	4.71179	4.80323	2.75907	2.68756
9930104L06Rik	4.48486	4.38693	5.95612	7.61816	5.04671	4.76758
9930111J21Rik1	0	0	0	0.0142106	0	0
A130010J15Rik	6.18151	5.83565	6.10851	5.18817	4.73324	4.92826
A230001M10Rik	0.0387674	0	0	0	0	0
A230009B12Rik	0.182883	0.0395064	0.232559	0.147012	0	0
A230020J21Rik	0.376975	0.396729	0.137486	0.426686	0.171604	0.290267
A230028O05Rik	0	0	0	0.0803721	0	0
A230046K03Rik	17.2702	13.0313	17.4628	15.931	16.1998	16.5394
A230050P20Rik	11.4929	13.1293	13.5067	13.9552	12.6807	13.3167
A230056J06Rik	0.0217911	0.025131	0.0710474	0.0705229	0.0329825	0
A230056P14Rik	0.146156	0.320443	0.0528922	0.125894	0.41811	0.408067
A230057D06Rik	0.0357453	0	0	0	0	0
A230065H16Rik	0	0.412331	0.559533	0.231418	0.324692	0
A230070E04Rik	0.0770333	0	0.0893293	0.100176	0.168584	0.173196
A230072C01Rik	0.763254	0.579812	1.66902	2.27535	0.669873	0.45369
A230072E10Rik	0	0	0.0151373	0.0196465	0.0178241	0
A230073K19Rik	0.0315871	0.0279081	0.0319533	0.0235578	0.0304937	0.0325105
A230103J11Rik	0.3783	0.38777	0.76688	1.26946	0.441951	0.494443
A2m	10.0256	7.93762	11.1709	9.89209	0.228598	0.0797959
A330009N23Rik	1.26021	1.37382	1.16917	0.544195	0.169468	0.199993
A330021E22Rik	0.190243	0.316913	0.234323	0.376253	0.0639884	0.0469061
A330023F24Rik	0.0128726	0	0.0251817	0.0104149	0.0389672	0.0142823
A330032B11Rik	0	0	0.0244667	0	0	0
A330033J07Rik	0	0.0283882	0	0.0398316	0.0372573	0.0273111
A330035P11Rik	0.12824	0.369739	0.401389	0.435778	0.329973	0.284569
A330040F15Rik	0	0	0	0.115692	0	0
A330041J22Rik	0.0393107	0.0452967	0	0.0635703	0	0.130719
A330048O09Rik	1.67876	1.2907	1.09468	2.03737	0.105872	0.155217
A330050F15Rik	0.0614922	0.0177292	0.0601464	0.024876	0	0
A330069E16Rik	0.469344	1.13669	2.32597	2.20247	0.63935	0.72904
A330074K22Rik	0.112578	0.0811452	0.146819	0.0227711	0.255593	0.156133
A330076H08Rik	0.0394343	0	0.0257142	0	0	0
A330093E20Rik	0	0.0189277	0.0867745	0	0	0.0357381
A330102I10Rik	0.150731	0	0.403634	0.166756	0	0
A3galt2	0.0201749	0	0.0131556	0	0	0
A430005L14Rik	90.3465	76.9481	108.839	101.21	49.0433	45.6264
A430033K04Rik	2.31931	2.11964	1.66931	1.77028	1.30814	1.43231
A430035B10Rik	0	0	0	0	0	0
A430078G23Rik	0	0.0134172	0.0455179	0	0.0176091	0
A430088P11Rik	0	0.0344106	0.0131871	0.0322383	0.0145782	0.0424804
A430090L17Rik	0	0.0106403	0.0120324	0.0149295	0.0139646	0
A430093F15Rik	0.100993	0	0.0439037	0.0817117	0.0254769	0
A430105I19Rik	0.128163	0.0985378	0.213574	0.357169	0.010777	0.0157999
A430107P09Rik	0.0316402	0.0364896	0.0412637	0.102398	0	0
A4galt	15.2429	28.5131	12.7066	13.5755	18.1975	7.31563
A530032D15Rik	0	0	0.0269735	0	0	0
A530046M15Rik	0	0	0	0.0390549	0	0
A530054K11Rik	2.25995	1.83932	2.29049	2.3091	1.29006	1.96297
A530058N18Rik	0	0	0	0	0.0362041	0.0530781
A530065N20Rik	0	0	0	0	0.0137863	0
A530072M11Rik	0	0.0225178	0.0763917	0.12638	0.0886588	0.0433269
A530088E08Rik	0	2.72636e-06	0	0	0	0
A630001G21Rik	0.111456	0.0642693	0.387616	0.480942	0.815371	0.535868
A630007B06Rik	7.56446	5.90314	8.89515	7.93592	6.52616	5.62322
A630010A05Rik	0.0454029	0	0.0296062	0.0367346	0	0
A630012P03Rik	0	0	0	0	0.0275424	0.0807586
A630020A06	0.290218	0.0780965	0.302792	0.516581	0.146423	0.150267
A630066F11Rik	0.185163	0.106443	0.28246	0.100033	0.657962	0.206028
A630072M18Rik	0.157882	0.234082	0.517026	0.348411	0.637794	0.457721
A630075F10Rik	0.0388742	0	0.0999561	0.0314501	0	0
A630077J23Rik	0	0	0.0558968	0	0	0
A630089N07Rik	1.13507	1.92506	1.93746	1.0264	0.732683	0.740808
A630095N17Rik	0	0.1683	0	0.236146	0	0.323836
A730008H23Rik	14.7114	16.4152	24.3352	30.651	24.2688	20.6492
A730017C20Rik	0	0	0	0	0	0
A730017L22Rik	0.148126	0.136663	0.115907	0.0719072	0.17936	0.328694
A730020M07Rik	0	0	0.0535004	0.0901177	0	0.0910945
A730036I17Rik	0.398117	0.241046	0.402385	0.289897	0	0.0441716
A730046J19Rik	0.0142689	0	0	0.0230893	0.0323956	0.0158315
A730056A06Rik	0	0.0143018	0	0	0	0
A730082K24Rik	0	0	0	0.12929	0.0604677	0.0898531
A730090H04Rik	0.176494	0.127215	0.143859	0	0.701235	0.146866
A730090N16Rik	0.109278	0	0.0356289	0.0442074	0.165401	0.121246
A730098P11Rik	2.04865	1.74208	2.38429	2.14009	1.57984	1.36668
A830009L08Rik	0	0	0	0.0199848	0	0
A830010M20Rik	0.666656	0.474867	1.32331	1.10255	0.445163	0.489483
A830018L16Rik	0.596145	0.701955	0.770544	0.847353	0.509457	1.14912
A830052D11Rik	0	0.120461	0.0454071	0	0.474288	0.772603
A830080D01Rik	7.05388	6.21262	10.9888	10.8222	5.10754	3.99212
A830082K12Rik	0	0	0	0	0	0
A830082N09Rik	0.0336451	0.0485022	0.0713024	0.115691	0.0891178	0.130654
A930001A20Rik	0	0	0	0	0.0419551	0
A930001C03Rik	0.201593	0.322097	0.374081	0.314912	0.31462	0.685565
A930003A15Rik	0	0	0	0	0	0.175668
A930003O13Rik	0	0	0	0.0298002	0.0278742	0.0408643
A930004D18Rik	0.439234	0.387589	0.327024	0.58432	0.894993	1.69134
A930005H10Rik	16.0072	12.4973	9.01662	11.625	9.03612	10.0602
A930006K02Rik	0.225294	0	0.0734545	0.182281	0.42625	0.249966
A930007I19Rik	0	0.0175527	0	0.0492566	0.0691098	0.0675469
A930011O12Rik	0.435681	0.753685	2.51149	2.0805	0.152178	0.148736
A930012L18Rik	0	0.0289542	0.0236165	0.0286808	0.222845	0.0506474
A930013F10Rik	0.173742	0.166976	0.736405	1.14799	0.175314	0.224897
A930015D03Rik	4.45438	4.69856	5.45498	6.15307	8.05757	7.11193
A930016O22Rik	0.164545	0.0678709	0.108891	0.239395	0.0206564	4.01883e-07
A930017M01Rik	0	0.0117816	0	0	0.06185	0.158685
A930018P22Rik	0.105086	0.0605963	0	0.0850231	0	0
A930024E05Rik	0.838702	0.769401	1.34239	0.431821	2.88509	3.80679
A930041C12Rik	0.195197	0	0.127283	0.15793	0	0
AA387883	0	0	0	0.035311	0	0
AA388235	0.140358	0.475493	0.320334	0.241316	0.318663	0.447719
AA413626	0	0	0	0.266445	0	0
AA414768	2.63653	2.20446	2.2923	1.9554	1.72926	1.56014
AA415398	0.113895	0.175135	0.12378	0.0614333	0.229852	0.0842452
AA465934	59.9124	39.2466	109.309	111.532	41.0528	42.482
AA467197	1.9761	1.62853	2.22931	2.04448	1.46238	1.81413
AA474331	1.23263	1.87386	2.55744	2.62923	1.35686	0.621643
AA543186	0.172579	0.149273	0.22507	0.209445	0.130606	0.0478697
AA543401	0.245279	0.742541	0.199926	0.297676	0.139219	0.13607
AA986860	0.308982	0.589329	0.480452	0.346141	4.24499	0.843862
AA987161	5.92425	4.90418	6.66764	6.11776	2.93994	4.81817
AB041803	0	0.0515152	0.282037	0	0	0
AB124611	0.0636231	0.0366848	0.0761863	0.102956	0	0
AF357399	0	170.015	288.388	119.275	111.566	0
AF366264	0.0242161	0.0279277	0.0315816	0.0195927	0	0
AF529169	0.270332	0.174221	0.290339	0.270183	0.361031	0.635159
AI115009	0.46832	0.225041	0	0	0	0
AI118078	0.72985	0.707038	1.16124	0.826709	0.198843	0.615431
AI182371	0.0872588	0.0251578	0.112154	0	0.0330102	0
AI197445	0.0720522	0	0	0.0114404	0	0.0399714
AI314180	3.70986	6.7363	4.38235	2.52716	16.9138	14.4127
AI317395	0.103921	0	0.0677645	0.0630602	0.0589847	0.0288254
AI413582	20.6562	29.346	31.7214	35.9681	13.9332	10.2966
AI414108	2.53966	2.14097	3.97814	4.03141	3.89621	5.08427
AI427809	0.17588	0.527387	0.0688084	0.142299	0.0798588	0.0390231
AI429214	0	0.12685	0.310801	0.207648	0.388456	0.244075
AI450353	0.50815	0.246162	1.39842	1.58556	0.377482	0.183144
AI462493	41.74	44.3934	33.4677	33.6876	38.842	39.1071
AI463170	0.193432	0	0.378399	0.156502	0.439163	0
AI464131	4.25599	5.73879	3.26064	3.71838	3.58829	1.25683
AI467606	4.31746	3.9617	4.5045	6.68257	1.19331	3.12409
AI504432	0.0120306	0.0208118	0.0392244	0.0194674	0.0910463	0.106785
AI506816	0.0288788	1.00693	1.48057	1.50811	0.0874206	0.483116
AI507597	0.954649	1.41812	1.73382	1.85276	0.996575	0.205567
AI593442	0.0468921	0.0886602	0.0308411	0	0.00893775	0.0262362
AI597479	18.5338	16.8511	22.9469	20.6545	12.7103	10.9832
AI646519	0	0	0	0	0.092559	0
AI661453	3.63744	6.28194	2.59687	2.2072	24.1045	9.10992
AI662270	0	0.154252	0	0	0.0404888	0.237439
AI747448	0.0230178	0.0132729	0.0150094	0	0.0174197	0
AI837181	23.4489	25.162	17.277	15.8571	28.8136	31.0728
AI839979	0	0	0.0867669	0	0.0503501	0
AI846148	24.6278	23.6945	25.5218	22.9689	27.8832	27.7017
AI847159	0.160913	0.139182	0.052464	0.130192	0.0608888	0
AI848285	3.90182	5.38126	3.93447	2.08289	3.53125	5.98044
AI854517	0.116886	0.130078	0.0592428	0.102909	0.222814	0.170493
AI854703	0.0763105	0.0990073	0.223922	0.416753	0.173253	0.169335
AI987944	2.85267	2.18099	4.77369	3.7334	1.10625	1.72067
AK010878	28.6393	33.0427	20.4202	19.7128	18.2314	18.342
AK129341	1.02669	0.76425	1.69196	1.57073	1.93541	0.807744
AU015228	0.0231423	0	0	0	0	0
AU015836	11.6805	25.3505	5.09772	2.34401	6.40354	2.39805
AU018091	40.8162	31.9221	34.6257	27.2684	17.6938	5.342
AU019823	6.64959	5.72658	8.58733	7.46443	9.52533	10.6125
AU019990	0	0	0.0225916	0.0769601	0	0
AU021063	0	0	0.0469459	0.00851474	0	0.547864
AU021092	0	0.0318046	0	0	0.0417411	0
AU022252	16.5625	16.334	11.986	13.2438	12.5636	12.4083
AU022751	0.590224	0.385688	1.47919	2.45027	1.51811	1.35358
AU022754	0	0	0	0	0.0351036	0
AU040320	2.33661	3.23291	2.43054	3.22133	7.23307	4.94986
AU040972	0	0	0.0504419	0.0625857	0.0585415	0
AU041133	0.0793865	0.137331	0.534917	0.44961	0.580762	0.822083
AV039307	0	0.0424444	0.14012	0	0.11675	0.0799713
AV051173	0.771807	0.26703	0.503278	0.124891	0.116819	0
AV320801	0.0183943	0	0.0238515	0	3.34892e-07	0
AW011738	0	0.043774	0.0165004	0	0.13405	0.0561509
AW146154	0.661405	0.658762	1.25465	1.00539	0.925248	0.822787
AW209491	13.8422	13.4384	14.3094	14.8619	14.2892	14.9019
AW495222	0	0	0.0564242	0	0	0
AW549542	0.164508	0.189722	0.214544	0.33275	0.155622	0.136893
AW549877	8.14951	7.53859	11.8215	10.2153	7.88119	8.04867
AW551984	1.06601	0.732214	0.889347	1.09079	0.344053	0.504409
AW554918	1.57274	1.47551	1.7825	1.52495	1.47362	1.67573
AW822252	0	0.0424077	0.0479561	0.119005	0.278285	0.163195
AY074887	13.2354	10.1256	9.39954	12.1928	6.14867	9.59602
AY358078	5.53365	5.22951	7.04968	6.96446	8.95725	7.95881
AY512915	0	0	0	0	0	0
AY512931	0.117417	0.0338532	0.0765648	0.189999	0	0
Aaas	76.0168	74.9595	71.8279	69.0623	59.0998	50.0113
Aacs	13.3157	14.957	14.429	15.7134	25.283	21.308
Aadac	0	0	0	0.0478307	0.134218	0.196775
Aadacl2	0.0464543	0.0267871	0	0	0	0
Aadacl3	0.0217985	0	0	0	0	0
Aadat	0.122517	0.0235492	0.106521	0.0330421	0.18544	0.181246
Aaed1	15.463	13.3747	17.3165	19.718	10.3666	11.2822
Aagab	18.8942	18.3389	21.4908	27.4469	23.256	25.3704
Aak1	0.945956	0.839488	1.00619	0.789797	2.00048	1.24082
Aamdc	12.4846	13.3082	13.6946	15.5065	6.20408	6.76327
Aamp	206.376	215.23	167.58	197.734	165.818	169.22
Aanat	0	0	0.0365569	0.0453603	0	0
Aar2	13.7113	14.1467	12.0763	11.1893	18.474	17.5168
Aard	8.89807	16.6917	10.4293	4.41978	2.25886	2.56185
Aars	167.95	157.803	127.23	103.657	140.166	158.64
Aars2	16.8206	22.8518	13.8604	14.2707	15.4365	13.5605
Aarsd1	82.0636	83.5515	71.4111	88.1893	49.6234	64.3939
Aasdh	5.28523	4.99091	8.10559	8.85032	2.89881	2.67661
Aasdhppt	25.2977	22.1386	27.7398	29.6189	18.5063	21.5394
Aass	0.808655	0.932595	1.95343	1.39775	0.445077	0.530171
Aatf	53.1901	45.7859	38.681	36.3464	45.2282	52.08
Aatk	0.167913	0.432308	0.286313	0.251233	0.421071	0.390451
Abat	1.01044	1.2459	1.3275	0.877778	1.47151	1.53335
Abca1	0.798281	2.11377	0.524705	0.573534	0.22232	0.205483
Abca12	0	0	0.0103167	0.00640032	0.0359201	0
Abca13	0.00812431	0.0163966	0.0132442	0.0230062	0.00922258	0
Abca14	0.024805	0	0.0161748	0	0.0187722	0.0137607
Abca16	0.014559	0.00839467	0.00949311	0.0117792	0.0110178	0.0161535
Abca17	0	0	0	0	0.0291845	0
Abca2	2.19078	3.38445	3.89655	3.44582	3.92837	4.37163
Abca3	1.4128	2.39361	1.68807	1.57602	4.87167	1.89387
Abca4	0.0547116	0.0683552	0.0951364	0.022133	0.048306	0.151758
Abca5	0.246872	0.367368	0.602376	0.380149	0.662946	0.318087
Abca6	0.0976429	0	0.0339461	0	0	0
Abca7	2.13112	2.19691	3.80189	3.78195	1.7041	0.914573
Abca8b	0.0967766	0.0310026	0.126212	0.0782999	0.122066	0.131236
Abca9	0	0	0	0	0.0400843	0.0235067
Abcb10	9.74372	9.45761	10.1025	14.0051	10.563	11.8884
Abcb1a	2.50375	2.42176	1.85208	1.33959	0.896468	0.283768
Abcb1b	3.95791	5.79964	5.36415	3.54133	12.5098	5.82069
Abcb4	0.0498029	0.0957268	0.0324753	0.0805889	0.0502537	0
Abcb5	0.0175016	0.0201841	0	0.0283204	0.0132451	0.0194183
Abcb6	11.7321	13.639	14.1791	16.659	20.5923	20.2573
Abcb7	12.7789	9.87613	13.1666	12.8374	10.8962	12.8311
Abcb8	9.84571	13.1433	6.46613	7.90892	13.0528	13.5311
Abcb9	0.143754	0.272364	0.227651	0.199386	0.155416	0.182282
Abcc1	13.4399	13.0113	14.1654	15.5445	21.7165	15.8693
Abcc10	3.20932	2.89585	3.11544	3.23885	3.15593	2.16022
Abcc12	0	0	0.0194564	0	0	0
Abcc2	0.136296	0.0214344	0.234308	0.240598	0	0.0137475
Abcc3	0.147299	0.123545	0.270687	0.195016	0.324288	0.237716
Abcc4	16.838	22.7021	11.7373	12.4068	9.77155	30.9179
Abcc5	11.4776	10.5681	13.8062	15.121	12.9064	16.5198
Abcc6	0.0270297	0.0233793	0.0264382	0.0437383	0.0204558	0.0149949
Abcc8	0.527746	0.226286	1.26181	1.19338	0.87047	0.675623
Abcc9	0	0.0103413	0	0.0145127	0.00813929	0
Abcd1	2.11106	2.31868	2.21563	2.47256	2.55621	2.05226
Abcd2	0.0842774	0.0277698	0.109911	0.038964	0.0364458	0.0400744
Abcd3	13.137	10.1622	14.0761	15.8375	11.3122	13.0132
Abcd4	6.86544	9.43418	8.64672	11.1318	8.14969	6.3887
Abce1	96.0715	82.1576	96.8082	81.3746	92.9207	86.6176
Abcf1	155.276	132.721	116.178	111.013	115.976	111.101
Abcf2	124.518	110.077	113.201	103.913	107.983	121.591
Abcf3	17.7166	18.8455	17.9133	17.7068	18.7866	17.5754
Abcg1	7.51805	7.62118	5.9843	6.71226	0.467637	1.6505
Abcg2	18.1091	14.5447	24.0572	22.3871	26.1328	22.0267
Abcg3	0.204448	0.0523963	0.251819	0.110276	0.0515747	0.0504084
Abcg4	0.0563454	0.140793	0.0244944	0.136764	0.142139	0.104193
Abcg5	0.0312398	0.018014	0.0203708	0.0252755	0	0
Abcg8	0	0.0131115	0.0783158	0.0485852	0.0454451	0
Abhd1	1.79497	1.2209	1.52269	2.25325	1.86231	1.2621
Abhd10	17.2278	14.5831	18.832	20.6361	11.9839	13.4316
Abhd11	34.4609	36.3921	32.0611	32.0134	22.5271	18.7816
Abhd11os	11.6569	16.4874	14.0551	17.4392	3.6619	7.80892
Abhd12	16.6792	20.0985	14.8506	18.2195	17.9811	20.49
Abhd13	8.25346	7.34303	7.48935	7.34084	9.11515	8.66593
Abhd14a	25.3039	30.6977	26.0801	23.9703	20.3546	20.2552
Abhd14b	1.92551	1.22719	3.99803	4.50967	2.68432	2.13637
Abhd15	0.253324	0.194767	0.110125	0.170799	0.127809	0.187377
Abhd16a	12.2336	10.4216	11.6646	13.6059	12.335	11.3589
Abhd16b	0.163878	0.0708732	0.187007	0.232033	0.0620105	0
Abhd17a	71.9147	82.2053	56.9544	56.2958	69.2114	67.2333
Abhd17b	11.4123	12.3286	13.3138	11.0205	12.8586	12.0022
Abhd17c	32.0673	35.341	23.5087	23.8469	45.6166	39.6142
Abhd2	8.98042	8.61237	8.04607	8.98115	12.0963	9.19743
Abhd3	0.4206	0.926031	1.22172	1.85617	0.810232	0.551508
Abhd4	16.7359	30.9989	16.2937	16.3899	30.0134	33.2564
Abhd5	3.5592	3.72698	3.97254	2.80901	17.7478	10.2964
Abhd6	2.97938	4.11095	3.83931	4.41934	5.47584	2.75471
Abhd8	8.99574	12.2286	7.30295	6.3429	12.4948	12.3458
Abi1	16.9073	16.4073	18.0858	16.4801	16.6405	15.7228
Abi2	19.9024	18.303	17.7445	17.9346	16.474	24.7875
Abi3	1.95336	2.24795	1.63766	1.67227	0.753004	1.30825
Abi3bp	0.0174625	0.0100691	0.0682404	0.0496223	0.0396477	0
Abl1	17.5113	19.6314	14.8186	15.2596	20.746	16.3573
Abl2	15.2622	12.2801	12.9076	12.4878	18.8199	23.9355
Ablim1	3.39426	3.37698	3.2906	3.06488	1.08979	0.662619
Ablim2	0.634085	0.476433	1.04058	1.57111	0.0727074	0.087956
Ablim3	0.320417	0.418019	0.448321	0.24628	0.715157	0.72879
Abo	0.0884251	0	0.105515	0.0715422	0.033457	0
Abr	16.3898	19.2242	14.8153	12.1092	15.2435	19.2751
Abra	0.0413122	0.023822	0	0.100275	0	0.0458364
Abracl	30.1275	22.609	30.7919	30.5127	68.4006	48.5994
Abt1	14.8853	14.6484	10.2779	11.8967	14.0441	14.9058
Abtb1	8.52401	11.0261	8.41258	9.13333	6.30559	7.83864
Abtb2	1.00352	1.54026	0.971934	0.847746	6.04211	1.621
Acaa1a	25.7625	35.2043	23.8483	26.8089	14.1367	18.7495
Acaa1b	1.58192	1.90039	2.83672	1.9554	0.53208	0.731316
Acaa2	34.4853	36.2464	33.3418	31.3187	18.389	16.9808
Acaca	3.00458	2.89037	3.03607	2.07189	3.2208	2.74438
Acacb	3.77707	4.10553	3.19121	3.51403	1.48498	2.43526
Acad10	2.35117	3.14537	3.23799	2.19142	3.23127	3.23472
Acad11	9.89525	9.14836	9.50539	11.0496	10.1499	9.39104
Acad12	1.24426	1.6912	1.37157	1.74974	1.97296	1.80782
Acad8	7.7404	8.64779	8.43852	9.57002	7.48706	8.10499
Acad9	14.1734	15.3466	13.4	13.3179	15.7353	14.1299
Acadl	16.6769	22.6582	16.9856	14.0302	50.3719	45.4802
Acadm	75.0019	67.1692	71.0123	89.819	28.3279	33.7703
Acads	38.1639	48.0448	43.0213	49.598	23.0063	23.4431
Acadsb	9.20013	9.59634	8.6655	9.64363	8.6181	7.66708
Acadvl	17.4437	18.9581	18.8168	21.0913	16.5629	11.3678
Acan	2.31738	1.29484	3.01636	2.10749	1.21676	1.18592
Acap1	9.96557	7.97671	11.1558	10.9409	1.47418	0.626455
Acap2	10.8166	9.63562	12.8677	11.3877	10.3039	9.25871
Acap3	4.06698	3.35538	3.77398	3.23989	6.08467	5.46691
Acat1	11.0341	12.4679	12.8294	14.3922	8.76492	10.7797
Acat2	33.9206	33.967	43.4758	39.6791	28.7138	25.1284
Acat3	0.208456	0.212418	0.160499	0.10018	0.126782	0.0924805
Acbd3	20.402	19.1839	16.7033	16.3317	28.6168	21.6758
Acbd4	7.56083	10.0276	8.33659	8.98132	4.23945	4.30881
Acbd5	7.685	6.49713	8.70307	8.00449	6.17483	5.63769
Acbd6	95.6035	98.5835	74.833	77.5891	95.4323	102.566
Acbd7	5.49896	6.34177	6.40312	8.58039	1.48627	1.52529
Accs	0.531537	0.719946	0.793833	0.765788	0.44119	0.41853
Accsl	7.19323	4.58834	5.54148	7.15898	0.722622	0.953479
Acd	24.0555	22.8145	21.6027	23.3468	26.8683	29.8505
Ace	0.439264	0.32753	0.315042	0.287673	0.0310202	0.0303187
Ace3	0	0.018454	0.0208684	0.0258929	0	0
Acer1	0.578096	0.166675	0.848167	0.56127	0.131249	0.0962107
Acer2	15.3978	12.9061	12.1236	10.862	14.596	13.9021
Acer3	1.96756	2.25951	3.33798	3.27826	3.43234	3.90356
Ache	0.064118	0.0554589	0.0209049	0.103753	0	0
Acin1	108.367	109.217	93.2512	82.4156	103.856	102.774
Ackr1	0.0675818	0	0	0	0.153436	0.299932
Ackr2	0	0	0.0310954	0.0964665	0	0
Ackr3	5.82983	11.7659	5.54583	7.39327	0.584354	1.28586
Ackr4	0.0337708	0.155787	0.176169	0.109293	0.153344	0.112407
Acly	136.565	143.591	129.913	138.648	111.953	125.213
Acmsd	0.0644862	0	0.101082	0.0499766	0	0
Acn9	20.0919	19.2733	29.1415	27.4983	12.3632	11.8753
Acnat1	0.0663176	0.0688338	0.0259465	0.0107312	0.160603	0.220741
Aco1	27.3429	29.0665	23.6541	24.9906	28.788	33.1614
Aco2	105.443	117.582	100.758	114.225	83.231	98.9025
Acot1	18.832	24.2412	15.2569	20.3154	10.9048	14.9848
Acot10	17.1973	12.7578	16.7265	16.1418	16.4878	8.0396
Acot11	0.846531	0.698309	0.838066	0.62242	1.27239	1.17405
Acot12	0	0	0.0147347	0	0	0.0250747
Acot13	57.6293	65.8423	73.756	78.4719	53.8811	81.8259
Acot2	3.22603	6.88288	2.4402	2.53181	2.5635	3.1498
Acot3	0.18842	0.217298	0.386145	0.457339	0.0203706	0.238919
Acot4	0.0606497	0.0699454	0.0593225	0.0245352	0.183596	0.0672916
Acot5	0.0490078	0.0847787	0	0	0	0
Acot6	0.357987	1.14682	0.337184	0.257458	0.722455	0.706118
Acot7	70.1615	72.8305	58.2289	68.082	68.7048	61.0911
Acot8	25.0548	33.1741	26.1491	33.3815	16.488	17.5252
Acot9	34.831	31.5775	34.7404	35.1972	37.5272	16.6914
Acox1	4.74574	5.21257	3.7039	5.56943	7.74438	9.18914
Acox2	0	0	0	0	0.0650634	0
Acox3	1.93394	2.57678	1.46207	1.42643	2.94092	3.28733
Acoxl	0.532353	0.279066	0.347135	0.450293	0.054938	0.483261
Acp1	1.70512	1.99163	1.7889	2.11352	1.69187	1.769
Acp2	1.8221	2.44946	2.05395	1.69317	4.44201	4.03517
Acp5	3.75242	3.92454	3.80908	4.51939	1.98726	3.27024
Acp6	90.783	68.3712	109.363	119.823	18.8315	31.3356
Acpp	0.359976	0.207574	0.399138	0.631183	0.238373	0.281777
Acpt	0	0	0.0782514	0	0	0
Acr	0	0	0	0	0.0414714	0
Acrbp	16.797	17.9352	15.8081	19.3426	4.60825	7.68363
Acrv1	0	0	0	0	0	0
Acsbg1	0.17506	0.072104	0.114153	0.242807	0.227115	0.443957
Acsbg2	0.187242	0.262213	0.209308	0.346271	0	0.0296782
Acsf2	4.17357	4.67092	5.48687	4.55679	1.44341	1.96677
Acsf3	7.45069	9.24079	7.72741	9.84779	10.5967	10.4046
Acsl1	11.6086	11.1364	11.8319	13.5102	4.31349	9.2248
Acsl3	33.7249	35.5753	45.3576	38.5747	44.223	28.0648
Acsl4	13.1561	9.66003	16.1745	10.482	14.6452	15.1794
Acsl5	4.99525	8.81739	3.96849	4.21804	18.5386	17.474
Acsl6	2.29475	4.20395	4.82588	5.29802	3.91279	5.52394
Acsm3	0.128302	0.0360693	0.185397	0.102608	0.0487904	0.104585
Acsm4	0	0	0	0.0267051	0	0
Acss1	9.15735	7.11711	7.02215	9.58724	0.918285	3.49191
Acss2	8.24167	7.34722	9.75866	12.6427	1.79528	2.38781
Acss2os	0	0	0.105827	0.130204	0	0
Acss3	0.066802	0.0770421	0.0435595	0.189173	0.101111	0.0370597
Acta1	0.252156	0.581614	0.0657649	0	97.6954	13.3733
Acta2	0.4345	0.109614	0.0354159	0	17.8387	1.38599
Actb	1794.17	1916.34	1287.88	1098.94	3969.63	2332.77
Actc1	0.0543155	0	0.0354179	0	4.48049	2.89266
Actg1	19.1911	20.6614	17.5793	15.4347	56.5672	40.5999
Actg2	0	0.0334424	0	0.14077	0.131672	0.128694
Actl10	0.297913	0.171787	0.356148	0.361553	0.0751525	0.11018
Actl11	0.0678425	0	0	0	0	0
Actl6a	166.348	131.196	169.28	195.851	95.459	130
Actl6b	0	0.0552537	0.0312414	0.0387634	0	0
Actl7a	0	0.0285649	0.0323021	0	0	0
Actl7b	0.105855	0.0305197	0.241589	0.0856447	0.0801096	0
Actn1	114.939	171.973	81.6588	78.1229	210.196	87.1621
Actn2	0.693769	0.813437	1.35717	1.422	1.54011	1.20593
Actn3	13.7548	11.759	10.9693	6.96028	5.16846	4.01468
Actn4	231.498	270.051	187.482	128.668	368.005	192.741
Actr10	16.0448	20.5427	14.5135	13.7715	13.3147	11.0211
Actr1a	41.0415	51.0863	41.8449	43.3316	64.612	49.8648
Actr1b	64.6105	75.4243	54.9652	63.0857	92.2821	87.7307
Actr2	125.091	101.224	141.983	143.198	137.986	131.998
Actr3	100.61	102.316	95.4079	89.6661	125.273	88.0965
Actr3b	8.67098	9.33494	10.7512	10.817	4.52559	7.15618
Actr5	9.32331	12.1347	9.51493	9.60273	9.43011	10.8698
Actr6	17.7354	14.684	21.8136	24.2514	8.44964	9.91027
Actr8	26.1759	23.6859	23.9619	23.2691	21.6637	24.6117
Actrt2	0	0	0.0339803	0	0	0
Actrt3	0.26686	0.439658	0.24859	0.185066	0.115404	0.211489
Acvr1	2.57451	2.80899	2.64878	2.8302	5.72304	6.05938
Acvr1b	15.1653	17.7913	15.5632	14.6563	10.448	9.84039
Acvr1c	0	0	0	0	0.0114971	0
Acvr2a	1.70813	1.98931	1.95184	1.71284	3.62212	2.78906
Acvr2b	12.0831	14.8029	9.89795	9.14994	19.9483	16.412
Acvrl1	1.77701	1.8929	1.61004	1.38982	0.329216	0.0846996
Acy1	51.9978	49.8314	41.4264	43.5498	20.4408	25.5258
Acy3	2.28047	3.14456	2.32755	3.24895	1.6508	1.04509
Acyp1	30.6472	55.373	36.9235	45.1051	14.7996	22.1832
Acyp2	1.94162	2.79901	1.89913	2.80523	3.14871	2.00038
Ada	13.4161	9.67021	16.1508	17.3257	6.50843	4.81865
Adad1	0.29115	0.209859	0.284778	0.176672	0.302966	0.363414
Adad2	0.821146	1.85096	1.72804	1.14755	1.12988	1.65649
Adal	7.29321	5.82329	9.14103	7.85708	5.30255	7.10444
Adam10	8.64539	7.2497	10.1379	11.9267	7.85128	8.21024
Adam11	0.45914	0.537032	1.18892	0.880865	0.575782	0.567593
Adam12	0	0	0.0112135	0.0069567	0.0130142	0
Adam15	10.7488	12.6076	11.4548	13.2261	13.2209	9.17481
Adam17	13.5014	10.2549	13.545	14.5858	16.2824	12.8537
Adam19	12.1189	11.9062	9.53981	14.3324	9.9253	20.9405
Adam1a	0.0667788	0.0385069	0.0870898	0.0900488	0.0842291	0.197578
Adam1b	0	0	0.0156432	0	0.0181553	0
Adam2	0.0821989	0.0157996	0.232267	0.266022	0.0414715	0
Adam21	0.0237502	0	0.015487	0	0.0359478	0
Adam22	1.51109	2.10406	2.63416	2.97389	1.20244	1.73445
Adam23	44.3663	49.0767	53.0207	53.3967	18.9531	42.4268
Adam25	0	0	0	0	0.0201342	0
Adam32	0.0286724	0.0165335	0.0934831	0.0463965	0	0
Adam33	0.0668947	0.0257084	0.101774	0.072157	0	0.049473
Adam4	0.0302534	0.0174451	0.0394551	0.0244774	0.0457909	0
Adam5	0	0.0156361	0	0	0.0205223	0
Adam7	0	0	0	0	0	0
Adam8	0.318003	0.366774	0.602853	0.492585	3.7897	0.604873
Adam9	5.43837	5.83069	7.13847	7.22052	12.1153	6.37303
Adamdec1	0	0	0	0	0	0
Adamts1	0.356871	0.506544	0.143204	0.0777367	4.03036	1.85793
Adamts10	0.767969	0.806189	2.50709	2.37743	1.02015	0.666877
Adamts12	0	0	0	0	0.0322484	0
Adamts13	0	0	0	0	0.0149722	0
Adamts14	2.28164	2.75771	2.0594	3.11843	0.595086	3.0464
Adamts15	0.448917	0.653624	0.424457	0.37229	3.69463	5.3419
Adamts17	0.0992538	0.178059	0.107869	0.0535361	0.16692	0.0856515
Adamts18	0	0	0	0.0111769	0.146364	0.0153273
Adamts19	0.144001	0.20759	0.225359	0.0699049	0.283344	0.399427
Adamts2	0.118636	0.154	0.118944	0.085321	0.538463	0.312962
Adamts20	0.219209	0.189359	0.142781	0.413635	0.0717412	0.081017
Adamts3	0.052244	0.0552304	0.0624564	0.0845391	0.303123	0.328471
Adamts4	1.61185	2.4999	0.821512	1.07927	0.7992	0.575567
Adamts5	0	0.0140642	0	0	0.246109	0.072163
Adamts6	0.0139132	0.00802283	0.0272175	0.0225138	0.315881	0.216116
Adamts7	0.687183	1.2536	0.847309	0.899685	3.59309	1.23376
Adamts8	0.8437	1.66493	0.59906	0.470249	1.17768	2.64187
Adamts9	0.804092	1.391	0.502782	0.320831	1.48381	2.63979
Adamtsl1	0.344907	0.315306	0.285247	0.387958	0.15916	0.0746691
Adamtsl3	0	0	0.0236598	0.0220173	0.00686477	0
Adamtsl4	1.51339	1.52211	2.03107	1.76549	0.479436	0.156198
Adamtsl5	0.362753	0.771015	0.561968	0.248012	1.26859	0.453283
Adap1	11.2221	9.15748	11.4638	11.2843	7.22885	4.1612
Adap2	2.12613	1.35926	1.44668	2.54291	0.804516	1.99999
Adar	10.2908	9.8189	9.79864	10.119	14.781	13.5095
Adarb1	1.66858	1.73771	2.0555	2.2173	1.34465	2.20814
Adat1	7.59221	6.72369	9.09285	8.97643	9.64751	9.53393
Adat2	15.9386	15.8468	14.8885	18.9291	16.8441	19.7768
Adat3	6.88438	5.13915	5.56793	6.47675	9.00647	11.1318
Adc	8.30188	11.6538	13.35	15.1054	9.66581	5.62665
Adck1	9.22673	15.7292	7.32653	7.054	7.44927	8.24219
Adck2	1.38761	2.42266	1.24414	1.18506	2.30445	1.64649
Adck3	7.28505	7.71789	7.02268	8.46661	0.795194	1.79655
Adck4	6.86679	8.98387	6.67427	7.49506	5.56441	5.35472
Adck5	11.4615	12.5694	14.3515	14.3722	11.0686	10.9247
Adcy1	1.0921	3.33304	1.16721	0.646535	1.62476	1.37129
Adcy10	0	0.00740197	0	0.0103858	0.0582872	0
Adcy2	0.0320739	0.120217	0.031372	0.0259503	1.48066	0.533795
Adcy3	4.45308	4.64304	4.52993	4.43162	3.96476	4.3241
Adcy4	0.0402864	0.092922	0.0788095	0.0325949	0.0762208	0.0223491
Adcy5	0.238153	0.0991807	0.181176	0.54594	0.110142	0.249554
Adcy6	0.773037	1.41369	1.23139	0.777342	2.23146	1.49484
Adcy7	0.189801	0.361818	0.832942	0.54394	1.47534	0.919943
Adcy8	0	0	0	0	0.0204882	0.0450637
Adcy9	0.442118	0.761494	0.644329	0.789497	0.518417	0.634613
Adcyap1	0.068151	0.117895	0.0444397	0.0551395	0	0
Adcyap1r1	0.10783	0.0808368	0.195631	0.0959731	0.241425	0.370902
Add1	24.3991	27.9967	26.9164	17.4173	46.3689	26.0017
Add2	0.047393	0.0240958	0.0272772	0.0579534	0.0966328	0.10883
Add3	15.039	16.987	15.9546	14.3425	7.27001	9.93158
Adgb	0	0	0	0	0.0387883	0
Adh1	0.0570172	0.197268	0.111539	0.0922627	0	0
Adh4	0	0	0.568809	0.470508	0	0.064522
Adh5	358.434	324.056	320.692	312.14	165.7	225.223
Adh7	0	0	0.111871	0.0277613	0.0259672	0
Adhfe1	0.888521	0.537963	1.46297	1.83318	0.0504182	0.340218
Adi1	42.0557	39.0132	30.7909	34.6637	36.8945	50.0117
Adipoq	0.188092	0.0723068	0.0408835	0	0	0
Adipor1	114.751	134.133	104.932	109.747	159.372	139.477
Adipor2	41.9368	44.1253	40.8351	23.3763	38.5428	23.4639
Adk	50.0832	46.7076	41.3404	34.0929	49.7024	52.8685
Adm	2.46295	1.98831	1.89155	2.92266	2.85804	0.850167
Adm2	1.48161	1.95279	1.84024	1.94082	1.12127	1.95698
Adnp	34.4974	32.0186	28.6648	24.2936	34.5924	33.178
Adnp2	26.0655	26.8144	20.3203	19.1837	23.0219	26.7903
Ado	13.8179	16.1629	10.0576	8.96099	12.6244	15.7178
Adora1	0.132437	0.0203269	0.247204	0.203312	0.220931	0.317768
Adora2a	0.482283	0.278101	0.663915	0.433561	0.446095	0.148639
Adora2b	0.863311	0.995629	1.38177	1.04773	0.980017	1.04493
Adpgk	25.957	25.2242	30.8367	33.3036	16.896	17.5316
Adprh	94.1755	123.66	79.7382	115.445	62.5079	51.5451
Adprhl1	0.277446	0.191982	0.2171	0.404057	0.125981	0
Adprhl2	46.6565	56.4882	44.246	45.8538	51.3511	44.0287
Adprm	12.8001	12.1382	15.0305	16.7076	9.98968	14.0909
Adra1a	0.0290616	0.0513261	0	0	0.0134711	0.0395026
Adra1b	0	0	0	0	0.0647998	0.0237477
Adra1d	0.0293676	0.0169344	0	0	1.31128	0.325837
Adra2a	0.0893349	0.072119	0.0466026	0.0289116	1.00059	0.356826
Adra2b	0.0860998	0.287959	0.235804	0.208985	0.286701	0.191058
Adra2c	0	0.086664	0.0420011	0.0694851	0.292474	0.166752
Adrb1	0.590515	0.632378	0.843468	0.523276	0.446896	0.374391
Adrb2	1.05906	2.22723	1.48274	0.856865	1.50868	1.14048
Adrb3	2.20856	3.13374	4.06154	4.03557	2.34749	1.01871
Adrbk1	22.3706	24.6552	18.2969	16.4943	33.9822	29.3128
Adrbk2	1.14181	0.996362	1.73291	2.2368	1.75117	1.30051
Adrm1	29.4976	24.8621	22.0119	25.2272	24.711	28.6443
Adsl	53.8632	48.7336	55.253	52.8884	47.5847	49.7813
Adss	116.377	114.986	117.23	99.075	122.485	87.8729
Adssl1	6.28608	13.7741	7.45755	5.34843	2.57812	2.6998
Adtrp	0	0	0.108685	0.224756	0.0217597	0
Aebp1	0.768514	0.587641	0.828277	0.716408	3.94453	1.90977
Aebp2	38.5547	36.1531	37.3174	41.4547	51.7138	60.4267
Aen	41.541	48.1245	33.1205	36.7892	70.294	65.3734
Aes	193.341	214.303	171.988	169.663	42.316	33.3597
Afap1	2.61428	4.49934	2.28601	1.45873	11.2188	4.4231
Afap1l1	1.48686	1.88855	1.83428	1.80449	3.07161	1.51594
Afap1l2	0.710007	1.15835	1.06147	0.980776	1.75616	0.537981
Aff1	18.2104	16.4125	14.9231	16.1993	14.2135	10.6388
Aff2	0	0.00865297	0	0.012141	0.238484	0.0832468
Aff3	0.829824	0.618866	0.937923	0.93995	2.49526	7.61079
Aff4	21.9849	16.6328	22.4455	24.9129	33.8174	41.875
Afg3l1	30.2479	36.3337	23.5844	23.8589	36.2309	34.999
Afg3l2	51.6727	45.6945	48.8234	40.6956	32.6958	30.3652
Afmid	1.54147	2.30479	1.7193	0.9061	0.731965	0.637164
Afp	0	0	0	0	0	0
Aftph	12.2948	9.74966	13.753	17.9771	12.8237	15.7256
Aga	5.12637	5.26915	9.32474	7.92128	4.49218	4.74081
Agap1	7.8035	9.07069	6.03804	5.50094	12.6184	13.1904
Agap2	0.461496	0.341172	0.354944	0.507423	0.134329	0.223195
Agap3	20.2951	26.5139	17.1814	15.4338	39.585	34.8223
Agbl2	0.0986422	0.0910087	0.0771868	0.17558	0.223954	0.153223
Agbl3	0.633347	0.231379	1.19861	0.602921	0.521511	0.445201
Agbl4	0.0884902	0.0255038	0	0	0	0
Agbl5	5.24656	5.18088	5.7211	5.77098	5.82114	4.74364
Ager	0	0.157133	0.260468	0.124958	0.47505	0.302083
Agfg1	67.7034	61.0689	67.0007	59.3525	42.8608	38.6167
Agfg2	15.9593	12.6411	15.2134	17.0586	7.47538	6.02967
Aggf1	33.7632	31.622	29.7673	25.3732	42.921	41.3424
Agk	3.81941	2.80806	3.73583	3.65674	2.69779	3.46078
Agl	2.26321	2.84593	2.65819	2.77424	2.15128	1.27065
Agmat	0.483117	0.464303	0.805075	1.17264	0.243745	0.416908
Ago1	9.27905	8.33638	9.54917	8.89383	13.2226	14.3364
Ago2	14.5983	16.8925	13.527	13.2984	23.4184	27.5868
Ago3	0.656902	0.712727	1.09906	1.05598	0.896153	0.690481
Ago4	0.0813497	0.111409	0.106093	0.123409	0.123129	0.124105
Agpat1	38.7804	37.8835	35.9825	36.4862	40.6309	34.2604
Agpat2	27.5411	24.4721	24.7625	25.5912	21.1274	14.2879
Agpat3	8.12637	14.138	6.93148	4.64582	36.8396	22.5298
Agpat4	13.8431	20.5976	12.3718	11.4748	27.7465	11.5507
Agpat5	18.5443	16.7351	20.2657	20.0529	19.4278	21.5784
Agpat6	17.3377	18.3106	14.9022	16.6134	34.5906	31.7811
Agpat9	0.120264	0.887658	0.0941057	0.097303	2.85785	0.266869
Agps	20.2522	18.7285	21.6295	21.2156	22.8541	20.2888
Agrn	18.8171	22.5529	28.2705	22.5326	42.6473	14.1636
Agrp	0.279787	0.260314	0.368245	0.0913005	0	0
Agt	0	0	0.0770006	0.0955402	0	0
Agtpbp1	3.93898	3.02514	4.5356	4.09976	2.61956	2.43293
Agtr1a	0.494781	0.463625	0.544447	0.450356	0.444653	0.686207
Agtr1b	0.0331089	0	0.0431791	0	0	0.0367347
Agtrap	16.5488	21.6331	11.9633	12.9271	12.6765	13.8501
Agxt	0.0477324	0	0.124501	0.0386193	0	0
Ahctf1	39.5978	34.072	34.685	30.3632	48.0804	39.7795
Ahcy	1.15572	0.809232	0.915107	1.17997	1.24948	2.1982
Ahcyl1	36.1598	37.9016	34.3573	35.3155	43.9153	35.4274
Ahcyl2	5.58259	5.31891	5.54503	6.13069	7.29223	8.8354
Ahdc1	19.6782	24.3326	13.2965	9.81266	27.2467	23.0474
Ahi1	2.90352	3.67542	4.40874	3.10987	2.76239	3.77375
Ahnak	5.05589	7.26673	4.90235	3.85696	36.7744	6.19767
Ahr	1.10514	0.987405	1.21162	1.35596	4.22775	2.39844
Ahrr	0.1419	0.106372	0.360866	0.470714	0.322165	0.251904
Ahsa1	326.781	424.473	236.089	257.431	254.513	270.068
Ahsa2	7.45686	6.77672	9.04011	10.5451	12.7565	17.0463
Ahsg	0.708808	0.775535	0.785975	0.477272	0.429583	0.218165
Aicda	0.0879821	0.219845	0.248608	0.118641	0.0665839	0.0650782
Aif1	0	0	0	0.0778833	0.1457	0
Aif1l	2.87658	2.13073	4.4835	4.27632	9.48661	10.7165
Aifm1	49.5529	45.3952	46.1774	46.0021	36.7076	36.4763
Aifm2	9.91591	11.2704	8.09699	9.97211	2.05179	3.03706
Aifm3	2.06033	2.09865	4.76884	4.90581	1.45025	2.13702
Aig1	3.87044	5.12008	3.3651	3.3157	6.77716	6.65196
Aim1	0.311712	0.297861	0.243912	0.244994	1.71196	0.543476
Aim1l	5.32966	7.87015	4.12812	3.77595	2.24079	1.2515
Aim2	4.57568	0.842411	4.96085	8.54156	1.29335	2.75247
Aimp1	174.697	153.879	190.272	221.592	143.798	165.226
Aimp2	111.966	104.69	110.969	135.04	121.604	116.928
Aip	26.8599	32.1976	25.5891	31.9044	30.5385	27.0771
Aipl1	0.0471366	0.135903	0.18442	0.495784	1.21286	0.156896
Aire	4.5766	4.09964	8.13745	5.98441	0.36921	0.049174
Airn	0	0	0	0	0.122721	0
Ajap1	0.112271	0.103583	0.0585676	0.0181673	0.169931	0.597918
Ajuba	53.5976	92.6624	32.9425	20.1612	201.513	117.291
Ak1	35.709	31.3118	33.7941	43.5476	30.7532	47.386
Ak2	183.462	169.241	195.195	210.43	132.162	136.082
Ak3	6.72882	6.34635	6.25294	3.83028	18.7994	15.5227
Ak4	14.6809	12.3476	16.706	26.8158	4.01166	6.23064
Ak5	0.31045	0.562622	0.130138	0.0717653	0.872654	0.467563
Ak6	63.4041	57.2937	69.002	49.5373	64.336	55.1933
Ak7	4.47263	3.7852	2.69885	3.47468	0.13472	0.0987549
Ak8	1.55551	1.54929	1.62904	0.915293	1.39123	1.15057
Akap1	67.198	65.4448	64.7944	70.1865	35.9889	40.3282
Akap10	9.77542	8.0872	14.4819	15.6767	13.7107	14.6682
Akap11	9.70449	7.52155	10.4831	8.43268	4.99114	5.77038
Akap12	166.829	160.033	134.807	125.981	199.107	168.94
Akap13	2.13374	1.68953	2.56215	2.53902	3.45014	4.0477
Akap14	0	0	0.0264285	0	0	0
Akap17b	2.91551	2.31629	3.01365	1.65121	1.95309	1.4257
Akap2	16.3166	18.7866	11.0318	8.6762	10.5653	4.77393
Akap3	0.0217985	0.0251395	0.0142143	0	0.0494906	0.0725571
Akap5	0.713608	0.788691	0.840175	0.713688	0.720068	0.307906
Akap6	0.00638434	0.0110443	0.00832617	0.00516543	0.0386528	0.113336
Akap7	3.39152	4.06372	3.67631	3.08255	2.28333	2.37016
Akap8	40.8889	32.7395	37.8752	32.0546	41.1708	39.9538
Akap8l	28.3795	29.6906	34.4061	42.6622	18.4538	23.8831
Akap9	2.00186	2.0971	2.06185	1.66332	4.52862	5.13065
Akip1	19.9749	21.8749	20.1397	24.7851	16.133	14.2472
Akirin1	21.0825	17.5675	26.0426	26.1627	15.5954	17.494
Akirin2	70.0519	68.8498	56.082	50.2547	65.8211	69.1863
Akna	3.81491	3.45784	2.33661	2.5935	2.97932	2.44766
Aknad1	0.0268047	0	0	0	0	0
Akp3	0	0	0.0284396	0	0	0.0967801
Akr1a1	331.385	316.423	274.58	363.992	365.889	402.287
Akr1b10	4.87318	7.35185	5.83808	4.53879	12.0502	11.1909
Akr1b3	18.002	26.3939	14.423	21.7159	10.6829	17.1793
Akr1b7	0	0.0711943	0.241527	0.199786	0	0
Akr1b8	23.0212	14.9637	20.0536	19.0999	4.69911	4.15956
Akr1c12	0	0.0361888	0.0409235	0	0	0.0696315
Akr1c13	0.250789	0.0361534	0.081767	0	0.0474487	0.0695635
Akr1c14	0.028698	0.0165483	0.0374267	0.023219	0.390931	0.0318408
Akr1c18	0	0.0384039	0.086857	0	0.201609	0
Akr1c21	0	0	0	0	0	0
Akr1cl	0	0	0	0	0.0848677	0.0622114
Akr1e1	9.12869	10.208	10.7648	11.838	5.10066	5.49016
Akr7a5	24.699	30.7212	21.3967	22.8692	15.2505	23.595
Akt1	16.5795	32.1412	12.97	13.3304	47.4669	35.7286
Akt1s1	43.1365	43.7015	30.4154	33.6436	80.7883	97.8159
Akt2	13.5562	16.2854	10.9646	10.6165	13.3337	13.5223
Akt3	5.54462	4.20299	9.44103	7.25108	10.9893	7.11157
Aktip	22.0072	17.9482	25.5557	27.3224	19.611	14.9205
Alad	8.94408	12.9618	8.11976	9.00058	13.2457	12.6751
Alas1	16.9974	15.496	16.7061	16.2444	13.7201	12.966
Alas2	0.185962	0.0857788	0.121257	0.120362	0.450368	0.0825236
Alcam	0.054048	0.116872	0.0792978	0.0327968	0.654447	0.254859
Aldh16a1	23.1034	21.8209	14.5595	16.5055	15.7945	18.9576
Aldh18a1	31.9479	32.062	26.9652	28.5309	22.5863	32.4238
Aldh1a1	0	0	0.0459017	0.0569535	0	0
Aldh1a2	1.49878	1.35039	1.14021	1.31369	0.401718	0.554306
Aldh1a3	0.24134	0.382703	0.131143	0.162719	0.0913217	0.0446282
Aldh1a7	0	0.0199886	0	0	0.0262336	0.0384605
Aldh1b1	15.9421	20.0297	9.7158	9.10333	3.31783	6.97316
Aldh1l1	1.98661	1.80199	2.1833	3.48555	1.77373	3.14528
Aldh1l2	0.352842	0.222535	0.46016	0.392531	0.166892	0.354781
Aldh2	179.587	133.742	146.255	208.389	163.495	225.978
Aldh3a1	1.99033	0.480426	3.04844	5.39275	0.280231	2.72186
Aldh3a2	8.91681	10.0175	9.76713	14.5532	9.2413	12.4032
Aldh3b1	2.41142	2.8266	1.34043	2.71864	0.448754	1.4474
Aldh3b2	0.197229	0.341187	0.300087	0.585104	0.0497536	0.182357
Aldh4a1	19.3181	24.3257	20.4716	23.8161	22.9253	23.697
Aldh5a1	3.43461	5.96024	4.97804	4.44523	7.24605	4.28368
Aldh6a1	12.9524	15.4667	11.1519	11.7843	4.21181	4.34905
Aldh7a1	45.3747	42.1015	43.9182	48.3325	57.6063	58.493
Aldh8a1	0	0.036382	0	0	0.0238743	0.0350017
Aldh9a1	84.4465	100.097	94.7582	99.409	86.377	122.755
Aldoa	2034.88	2373.27	1780.62	1781.56	927.663	1223.26
Aldoart1	57.9317	63.2373	56.8001	56.4202	28.3235	36.1552
Aldoart2	50.9183	70.1227	47.7306	49.7023	28.2542	38.207
Aldoc	29.5214	30.0072	36.1187	45.4061	3.8374	4.67239
Alg1	9.44671	8.51434	9.68823	12.1368	11.2199	11.5518
Alg10b	8.99366	8.60484	10.0875	7.26182	12.9637	12.5086
Alg11	8.19175	7.4251	9.50936	9.02513	6.38711	7.29148
Alg12	4.47419	5.94842	5.97807	5.43324	4.49718	4.00036
Alg13	72.8015	59.9374	78.6894	91.6521	35.6192	56.741
Alg14	10.6095	8.86028	9.60203	10.4339	12.1822	9.84333
Alg2	7.39604	7.87949	5.98437	4.77988	10.5631	9.40687
Alg3	22.8949	20.746	16.5804	16.9873	16.7677	16.0959
Alg5	9.65803	9.43824	12.3304	14.271	9.84804	8.79816
Alg6	6.14132	5.15908	10.2996	9.3478	5.38329	4.48539
Alg8	3.61631	4.50092	4.5061	4.75094	5.44647	3.09864
Alg9	8.32594	10.1696	8.08563	7.72861	9.57428	7.39991
Alk	0.460946	0.40842	0.249255	0.245596	0.212707	0.449057
Alkbh1	14.6162	19.4121	15.9048	15.6278	12.0299	12.1835
Alkbh2	39.7059	33.3501	38.0065	36.0651	18.0294	24.3545
Alkbh3	9.22552	10.2776	9.00316	11.831	7.97917	6.89352
Alkbh4	7.46505	7.94506	5.50755	6.17786	9.03915	7.57263
Alkbh5	46.2289	46.7216	41.6947	46.8585	40.7566	56.9852
Alkbh6	19.1658	18.6371	14.4858	18.1146	13.5155	17.5917
Alkbh7	43.1398	51.671	44.0192	46.0091	22.1391	29.8108
Alkbh8	6.57242	6.77149	7.6168	7.989	7.49626	8.70914
Alms1	2.29829	1.87053	2.58627	2.26859	1.62999	1.56642
Alms1-ps2	0.0667387	0	0	0	0	0
Alox12	1.68393	2.58049	1.41393	1.43708	1.34421	0.767809
Alox12b	0.630272	0.415356	1.2721	1.38412	0.0908539	0.0998992
Alox12e	0.275002	0.0528586	0.278947	0.543885	1.31809	0.508531
Alox15	0.349216	0.369178	0.815982	0.306089	38.3431	15.3369
Alox5	0.220608	0.424034	0.303691	0.218154	2.70836	1.55019
Alox5ap	5.9635	2.34982	8.10138	5.1466	2.55743	1.10276
Alox8	0.0628351	0.0120776	0.0546311	0.0677847	0	0.0232388
Aloxe3	0.55105	0.953263	0.413227	0.82481	0.458732	0.489118
Alpi	0	0	0.0196627	0	0	0
Alpk1	0.0839707	0.137191	0.365036	0.147201	0.677846	0.326083
Alpk2	0	0	0	0	0	0
Alpk3	4.89721	6.03232	4.78324	5.65671	0.843741	0.543351
Alpl	65.8605	52.4907	50.9416	68.6187	24.7954	44.2867
Alppl2	0.0674351	0.136099	0.30781	0.354642	0	0
Als2	26.9709	23.3146	25.2625	24.8043	29.4624	31.4889
Als2cl	2.52799	3.3269	4.72363	3.60936	2.70108	1.27027
Als2cr11	0.133538	0.0192506	0.0870768	0.540212	0	0
Als2cr12	0	0	0	0.0759398	0.0710319	0
Alx1	0.0280952	0.0324012	0.0366404	0.0454624	0.361456	0.218204
Alx3	0	0.0419479	0.0948723	0.0294287	0.578062	0.524634
Alx4	0	0.00741086	0	0.0103982	0.0389048	0.0427781
Alyref	315.595	344.133	230.486	266.248	315.35	379.067
Alyref2	2.35105	4.31042	2.24064	1.99973	3.19352	2.40786
Amacr	7.75684	8.69548	6.01307	7.32919	4.1872	3.67122
Ambp	0.0626362	0	0	0	0	0
Ambra1	14.7682	13.1163	13.628	14.7786	17.4741	18.8236
Amd1	0.0212848	0.0212708	0.0212762	0.0213238	0.021247	0.0212884
Amd2	9.83687	8.06588	10.4404	8.23272	11.8604	9.98711
Amdhd1	0.290093	0.184005	0.586405	0.445945	0.131724	0.128745
Amdhd2	13.8121	22.1531	12.8427	13.7826	12.8144	18.5031
Amer1	2.50251	2.20936	3.43089	3.02451	2.1703	3.22495
Amer2	0.090333	0.104646	0.0785388	0.0243611	0.732905	0.368911
Amer3	0.0154763	0.0267725	0.040367	0.0125216	0.0585615	0.103027
Amfr	3.94057	6.36875	3.92069	4.29588	24.6835	20.3211
Amh	0.176251	0.254081	0.143662	0.213902	0.233424	0.342218
Amhr2	4.72537	4.40653	3.4424	5.46598	1.03372	1.72031
Amica1	0.0285322	0.0658105	0.0930253	0.115424	0.107964	0
Amigo1	1.59759	2.10119	1.19868	1.2503	0.994695	1.17085
Amigo2	0.487901	0.559854	0.76351	0.702107	2.81344	2.00325
Amigo3	0.137468	0.221952	0.215135	0.378155	0.416136	0.183026
Ammecr1	6.1519	7.63073	6.27701	4.99528	10.3497	9.96834
Ammecr1l	7.40402	9.30897	6.4318	6.48863	19.4092	16.027
Amn	2.21677	4.08544	3.08942	3.20025	1.2171	1.30211
Amn1	4.86039	3.66155	8.02561	5.96208	4.5682	4.69684
Amot	1.14193	1.38217	0.986271	0.723335	32.4334	10.2925
Amotl1	1.82113	2.71423	2.15476	1.45561	15.9939	6.91716
Amotl2	12.3137	28.0117	7.77727	3.11663	178.852	51.7163
Ampd1	0.150416	0.156123	0.372716	0.340756	0.0455334	0.0333778
Ampd2	16.3873	15.2375	15.0153	13.358	28.5483	19.9405
Ampd3	2.07743	1.81651	2.92025	3.85758	0.567009	0.906854
Amph	2.87466	4.30298	2.70792	2.88077	3.38544	4.63121
Amt	82.364	100.423	66.1133	90.4951	45.3246	62.113
Amy1	0	0	0.0575387	0	0.0333869	0
Amz1	0.984858	1.10591	1.21681	1.1533	3.31475	3.19187
Amz2	13.9458	13.1145	12.5921	14.3908	13.9592	13.8181
Anapc1	19.6637	19.4699	18.1891	15.7672	25.3753	26.0293
Anapc10	5.44462	4.82349	5.56753	4.60536	3.85822	2.82823
Anapc11	37.9154	43.171	35.2424	40.4249	38.7278	37.5853
Anapc13	259.781	299.967	278.49	305.792	260.512	268.991
Anapc15	40.5642	37.6543	29.5431	34.0519	30.8015	27.3981
Anapc16	24.9131	21.6972	17.5897	26.8293	28.0426	36.1562
Anapc2	43.7882	49.6956	43.4707	44.1926	51.3853	35.1191
Anapc4	29.7499	28.9375	27.8907	29.1163	29.8217	29.8519
Anapc5	136.644	117.371	110.597	112.555	98.1387	98.5807
Anapc7	40.5336	41.6782	39.1607	48.2013	30.0829	35.4176
Ang	0.84362	0.79904	0.597932	0.309098	0.508419	0.136475
Ang2	0	0	0.182103	0.225948	0	0
Ang4	0	0	0	0.106678	0	0
Angel1	7.84383	11.2821	7.78137	8.47121	3.16149	3.38335
Angel2	14.9776	14.4681	16.0707	15.5088	17.3217	21.0121
Angpt1	0	0	0	0	0.0236614	0.0693788
Angpt2	0.0574549	0.0441739	0.0249767	0.0929711	0	0.169992
Angpt4	0	0.028003	0	0.0392912	0	0
Angptl1	0.097266	0.0187397	0	0.0786879	0	0.0360368
Angptl2	0.297573	0.766437	0.336337	0.160506	1.33619	0.836407
Angptl4	15.3395	12.8639	14.4728	16.4866	5.4461	7.35406
Angptl6	3.7851	4.14644	3.83147	4.50924	1.04009	1.7989
Angptl7	0	0	0.0451589	0.0280159	0.262053	0.115257
Ank	1.85482	2.84839	2.17707	1.72185	3.3689	7.86352
Ank1	0.0496526	0.094646	0.0323749	0.0368643	0.064174	0.0351761
Ank2	1.43416	1.15458	1.79233	1.45379	4.31744	4.53139
Ank3	4.44616	4.14485	4.374	3.78953	3.22466	3.25343
Ankar	0	0	0	0.011899	0.01113	0
Ankdd1b	0.206619	0.190629	0.296409	0.217322	0.156367	0.229246
Ankef1	0.0255257	0.029438	0	0.0413046	0	0
Ankfn1	0	0	0	0	0	0.0704186
Ankfy1	12.3287	11.2385	10.9865	10.0413	13.3653	12.9144
Ankhd1	17.0269	13.9477	17.6351	15.8023	16.7309	17.4888
Ankib1	1.72559	1.80875	2.33116	1.67174	3.62212	2.74454
Ankk1	0	0	0.0168933	0.0209607	0.019606	0
Ankle1	1.1333	2.42179	2.32567	2.64291	1.48831	1.25741
Ankle2	16.3952	15.9048	15.3171	15.4254	12.8911	14.0038
Ankmy1	0.190369	0.085379	0.24827	0.256705	0.0320153	0.0234685
Ankmy2	19.9936	18.2115	15.4877	17.0351	11.0497	17.9502
Ankra2	8.45599	9.53435	12.8555	12.7933	7.55161	10.6502
Ankrd1	0	0	0	0	3.30767	0.365985
Ankrd10	27.41	22.2105	33.2325	33.6751	21.5675	19.9921
Ankrd11	26.6283	25.2437	26.1718	24.0152	37.3684	29.6278
Ankrd12	0.877076	0.649048	1.66334	1.39559	1.18924	2.06789
Ankrd13a	35.81	41.0796	29.5255	30.4747	42.2949	32.1971
Ankrd13b	2.46278	1.60947	3.22523	2.77301	3.85186	4.03041
Ankrd13c	21.889	19.1145	21.7009	19.4512	36.2094	22.3059
Ankrd13d	1.66058	2.85349	3.46505	3.89627	2.53856	2.13723
Ankrd16	1.07694	1.29375	3.70631	3.41271	2.15074	2.05785
Ankrd17	21.0004	19.1786	18.8716	14.2749	33.6992	30.0298
Ankrd2	0	0.0415043	0.0469344	0.0582349	0.108943	0
Ankrd22	0	0	0	0	0.0314265	0
Ankrd23	0.183845	0.339236	2.06195	1.69569	0.91827	0.448752
Ankrd24	2.62367	3.24039	2.92419	3.13144	0.985741	1.17679
Ankrd26	3.8662	3.37438	6.0475	4.68736	4.09272	3.25284
Ankrd27	23.5846	12.3206	26.0528	27.441	26.0927	27.336
Ankrd28	21.2877	17.7161	21.6347	19.4267	20.6289	13.5046
Ankrd29	0.0631855	0.0485799	0.164807	0.136326	0.0318788	0.0233684
Ankrd32	2.88828	3.13194	4.4064	4.30626	3.50556	3.56737
Ankrd33	0	0	0.0338704	0	0	0
Ankrd33b	0.353572	0.163093	0.571502	0.448915	0.959776	0.420178
Ankrd34a	3.6715	2.81763	1.79558	1.37606	0.224736	0.868631
Ankrd34b	0.206418	0.267812	0.280418	0.26443	0.364501	0.572558
Ankrd35	5.47485	5.96747	4.6911	5.82058	0.707394	0.851899
Ankrd36	0	0.0432143	0.10751	0.0485075	0	0.0166299
Ankrd37	25.5533	17.5542	32.9645	39.0354	2.16423	2.1494
Ankrd39	5.49232	5.51303	8.62193	9.24952	4.92626	6.68061
Ankrd40	30.3336	33.4563	28.6237	23.5621	34.3752	31.5787
Ankrd42	0.623514	0.949184	0.504158	0.343041	1.50998	1.46661
Ankrd44	0.259724	0.280811	0.46574	0.499076	0.671568	0.264153
Ankrd45	3.78054	1.62183	3.32267	4.27044	1.60331	4.03245
Ankrd46	24.6957	24.5377	23.105	23.1813	24.3775	19.8761
Ankrd49	13.368	12.5381	18.51	14.1205	10.7412	11.1239
Ankrd50	2.44126	1.96608	2.01876	1.42345	4.48978	4.52443
Ankrd52	3.3365	2.72125	4.83479	5.49626	5.09555	5.84742
Ankrd53	0.0419878	0.0968463	0.191655	0.271771	0.0317759	0
Ankrd54	10.7639	11.2166	10.1022	13.0632	14.2264	13.9473
Ankrd55	0.0748455	0.0608341	0.153863	0.141302	0.0188766	0.0893791
Ankrd6	8.75358	7.16496	7.61387	7.26441	7.05361	8.87811
Ankrd60	0	0.0982205	0	0	0	0
Ankrd61	0.249225	0.0574846	0.357531	0.161314	0.113166	0.0553036
Ankrd63	0.0827795	0.0318223	0.0539787	0.0669752	0.0313233	0.0459225
Ankrd66	0.17305	0.133048	0.150456	0.0933405	0	0
Ankrd9	9.86181	9.87681	6.78693	7.69165	4.1348	4.698
Anks1	6.5006	6.20954	5.97689	6.45518	9.75554	8.58544
Anks1b	0.0378396	0.0163647	0.0188688	0.0153076	0.114547	0.0734712
Anks3	3.83774	4.68629	6.27466	7.6256	4.46332	4.1954
Anks4b	0	0	0	0	0.0266656	0
Anks6	0.287962	0.354237	0.200291	0.124258	0.958876	1.02239
Ankub1	0	0	0	0	0	0
Ankzf1	20.6541	20.8899	27.9402	26.3667	10.9264	11.7345
Anln	59.0972	53.0937	66.4722	68.1794	47.1937	34.062
Ano1	0.278147	0.0927864	0.343674	0.450135	0.299136	0.292369
Ano10	0.682672	0.881858	0.633628	0.480644	8.67388	4.95244
Ano2	0.0172616	0.0199073	0.0337677	0.013966	0	0
Ano3	0.154474	0.241776	0.215848	0.169618	0.51772	0.391752
Ano4	0.016408	0.0374671	0	0	0.0491728	0.0546496
Ano5	0	0	0	0	0.749525	0.295775
Ano6	6.24538	5.23828	6.31577	6.31794	11.2607	7.63317
Ano7	0.260884	0.184563	0.241653	0.190807	0.203973	0.231563
Ano8	2.27385	3.59006	2.14489	1.98832	2.97338	2.38172
Ano9	3.80052	4.03977	9.70392	15.9859	0.797017	0.736657
Anp32a	274.233	247.855	216.611	194.263	116.618	138.368
Anp32b	349.312	322.197	248.367	206.923	314.409	365.44
Anp32e	128.582	109.48	97.05	91.3989	86.2428	103.301
Anpep	8.74588	8.94645	10.4034	6.38142	6.15033	4.9626
Antxr1	0.126969	0.183036	0.165587	0.0308183	0.960886	1.05655
Antxr2	0.0181191	0.0731368	0	0	1.74147	0.623206
Anxa1	2.37982	3.89853	1.19914	1.75042	28.0386	2.76045
Anxa10	0.0408297	0.0470891	0.0532511	0.0330326	0	0
Anxa11	35.1663	32.6853	23.1226	22.8949	21.4152	23.1564
Anxa13	0	0	0	0	0	0
Anxa2	38.9831	47.879	38.4891	39.6483	189.305	20.7709
Anxa3	2.40345	9.11503	3.13447	1.68281	99.8299	16.4615
Anxa4	8.08293	10.3942	8.41912	8.27594	12.8567	9.56334
Anxa5	7.41577	8.30801	5.55409	6.20565	29.2474	9.07418
Anxa6	60.4468	54.3186	29.2474	9.07418	74.5837	37.4625
Anxa7	43.2821	32.92	42.4441	52.7055	50.4971	44.9909
Anxa8	1.38311	0.95262	2.1805	2.61111	0.377996	0.536563
Anxa9	0.039004	0.134997	0.0763169	0.189454	0.17716	0.0433006
Aoah	3.2394	0.845348	1.95815	2.46788	0.697884	0.918214
Aoc1	0	0	0	0.0210618	0.157666	0.0577817
Aoc2	0.524173	1.00222	1.56509	1.47318	1.00216	0.795841
Aoc3	1.13431	0.41543	1.7292	2.13314	0.0580022	0.153064
Aox1	0.0307598	0.0886858	0.230664	0.323533	0.0698361	0.085321
Aox2	0.0140533	0	0.0458192	0.0341107	0.0106354	0.046777
Aox3	0.077307	0.222889	0.0504102	0.075057	0.0819072	0
Aox4	0.188652	0.124323	0.202097	0.337976	0.0101978	0.119607
Ap1ar	19.0945	18.153	22.3122	19.829	30.3261	23.8624
Ap1b1	28.6398	27.5626	30.6941	37.9238	46.5291	59.0552
Ap1g1	20.1745	19.3963	17.7093	16.9986	23.0304	24.9918
Ap1g2	6.24713	11.6776	5.20414	4.29504	5.30278	4.04538
Ap1m1	25.1895	33.646	21.265	25.6751	26.8102	21.458
Ap1m2	21.3794	31.7469	25.1289	34.2621	53.2127	54.684
Ap1s1	60.7184	68.6047	62.4638	71.9639	56.7229	42.6463
Ap1s2	3.06311	2.5723	3.39223	3.62101	3.6764	3.8488
Ap1s3	3.03179	2.13673	3.01251	2.62817	4.27928	4.08462
Ap2a1	77.2012	85.3766	60.6234	59.1497	71.6903	77.4197
Ap2a2	49.9534	55.9375	40.2138	34.1532	71.4199	50.2318
Ap2b1	36.6816	39.9219	31.0938	30.1451	68.1602	55.1319
Ap2m1	13.1591	15.4362	11.0712	12.1075	21.2049	16.6804
Ap2s1	162.806	188.261	142.85	162.276	190.745	180.394
Ap3b1	40.434	42.3973	39.6425	40.4671	37.6733	45.1049
Ap3b2	2.9618	5.1442	1.71027	2.6273	4.21286	4.11759
Ap3d1	21.5784	25.6224	19.8286	20.7206	36.0985	33.8173
Ap3m1	7.43063	5.86519	7.72474	5.70397	6.04978	5.76092
Ap3m2	3.68447	3.05683	3.38044	5.78226	0.551621	0.712926
Ap3s1	8.38495	6.40789	8.69552	8.66402	7.07195	8.18234
Ap3s2	13.6283	11.9135	12.7092	14.5812	12.6751	14.4462
Ap4b1	5.27454	6.56243	7.60694	7.43928	5.84369	4.50772
Ap4e1	4.6144	3.70991	6.10405	5.27941	4.29978	4.70249
Ap4m1	8.76994	10.556	8.82786	10.4711	5.67044	5.29029
Ap4s1	7.23616	6.99527	6.98528	7.11739	8.85864	8.18603
Ap5b1	0.55649	0.641782	0.522539	0.414225	2.15626	3.01307
Ap5m1	4.464	5.13513	5.98079	5.34153	4.83413	4.03173
Ap5s1	4.17949	5.00873	5.17195	5.13951	5.29898	3.75593
Ap5z1	3.23737	3.87716	2.44739	3.26692	4.7654	4.34187
Apaf1	5.84568	6.69196	7.40434	6.59436	12.509	9.16158
Apba1	0.059958	0.103721	0.208519	0.194043	0.23444	0.188485
Apba2	0.433344	0.72583	0.60526	0.483957	5.26199	2.9764
Apba3	25.8281	30.9563	22.6836	19.7208	31.2384	27.3438
Apbb1	6.94627	8.8662	6.83272	7.67244	9.92138	9.865
Apbb1ip	0	0.0317482	0.017951	0	0.104168	0.122175
Apbb2	3.53259	3.06951	3.49054	4.03826	4.39762	4.82764
Apbb3	3.90562	3.64334	5.62683	6.01453	6.62817	5.00344
Apc	7.30519	6.76769	8.36442	6.47055	8.66381	8.51249
Apc2	0.188254	0.434215	0.13692	0.140596	0.50412	0.377573
Apcdd1	1.75916	2.62885	1.66412	2.18507	1.96885	1.89683
Apeh	17.8212	21.2479	16.5108	17.7737	18.7615	18.3046
Apela	50.8951	45.4216	40.2836	41.7877	47.576	33.6212
Apex1	223.935	233.955	144.482	149.79	186.268	219.752
Apex2	9.99159	10.4855	6.54025	7.92912	18.223	16.6499
Aph1a	2.53883	2.52483	2.23631	2.48161	3.85354	3.68414
Aph1b	0.177092	0.365919	0.375301	0.525364	0.335052	0.229233
Aph1c	0.0902889	0.193379	0.243912	0.25046	0.0878524	0.114488
Api5	66.1805	52.6871	54.884	49.9329	44.4115	48.6598
Apip	20.8938	22.5448	27.7749	30.1092	13.4369	14.4265
Apitd1	50.0661	40.4588	40.3593	50.4364	39.1682	50.6157
Aplf	2.72598	2.24701	2.49592	2.43906	2.79741	2.55112
Apln	0.633232	0.516237	0.427155	0.424001	3.43719	1.64743
Aplnr	0	0	0.0374204	0	0.376388	0.148565
Aplp1	40.5938	30.1369	29.9205	33.3668	8.65348	13.7955
Aplp2	112.327	110.729	99.289	108.36	97.3082	108.25
Apmap	7.77373	7.22818	6.61091	7.31161	10.5405	8.4813
Apoa1	0.246941	0.237324	0.268375	0.266393	0.0622941	0.182656
Apoa1bp	62.0873	79.3585	80.9714	86.828	31.65	33.5235
Apoa2	3.07769	1.53807	1.73931	0.498019	0.155278	0.227649
Apoa4	0	0	0	0	0	0.0488548
Apoa5	0	0	0.0198116	0.0245817	0.045986	0.101129
Apob	0.0234269	0.0189122	0.00611045	0.00758167	0.120559	0.0415879
Apobec1	3.9462	3.53411	4.30769	5.23096	1.84447	1.5151
Apobec2	2.41553	4.3619	1.11916	2.41723	3.89662	2.25689
Apobec3	51.6785	43.0087	39.3189	32.8265	24.8349	31.0022
Apobr	0.795117	0.622238	0.432065	0.520777	0.845296	0.462101
Apoc1	70.018	80.5526	49.3941	49.8989	17.7946	25.6744
Apoc2	0.494877	0	0.242023	0.400394	0	0
Apoc4	0.414332	0	0.270176	0.167613	0	0
Apod	3.99788	3.2901	5.21385	5.93533	0.558111	0.559845
Apoe	644.174	1068.32	371.965	365.105	502.55	741.286
Apof	0.0745629	0.085991	0.121552	0.241309	0	0
Apol10b	0	0	0	0.0292135	0.0819765	0.0400613
Apol6	0.243635	0.105366	0.158869	0.17248	0.280086	0.135158
Apol7a	0.0616045	0.0710473	0.140605	0.332971	0	0.0341729
Apol7b	0	0	0	0.0771786	0	0.0352791
Apol7d	0.325901	0.187925	0.722542	0.843774	0.0493276	0
Apol8	0.551402	0.408802	0.5907	0.223064	0.178841	0.174796
Apol9a	0	0	0	0.0409861	0	0
Apol9b	0	0	0	0	0.0753739	0
Apold1	0.146091	0.0601721	0.0272179	0.101313	0	0
Apom	0.633241	0.584237	0.165169	0.204937	0.191692	0.140518
Apon	0.0455318	0.105021	0	0.0368388	0.241206	0.202072
Apoo	0.683644	0.800686	1.54727	0.746862	0.544765	0.994976
Apool	21.2594	21.4654	22.5479	22.7959	18.0273	17.8091
Apopt1	34.6506	61.7079	27.926	28.805	34.0276	41.5479
App	5.56617	6.13029	5.21758	6.56042	36.3159	18.9
Appbp2	42.8374	38.7035	39.9564	43.9736	41.7288	34.5603
Appl1	12.453	8.90754	13.972	12.5905	11.2804	9.98818
Appl2	5.39469	5.9375	7.81553	8.50174	3.85189	3.74743
Aprt	290.199	344.524	249.87	303.006	308.752	272.394
Aptx	3.00874	2.59729	3.64785	4.1785	3.66539	3.43912
Aqp1	0	0	0	0	0.0190375	0
Aqp11	4.26473	4.85191	5.07332	5.31563	1.52652	2.6856
Aqp2	0.106293	0	0.0346555	0.0429996	0	0
Aqp3	10.5278	7.35627	10.9839	17.9376	1.78094	4.6265
Aqp4	0	0	0.00858851	0	0	0
Aqp5	2.19896	2.59112	2.40021	1.58575	1.37473	2.01547
Aqp6	0.450636	0.459738	0.497284	0.280462	0.131168	0.461526
Aqp7	0.0831573	0.0159838	0.0722999	0.0224269	0.041955	0.0307547
Aqp8	0	0.0290014	0.0327958	0.244153	0.0380622	0
Aqp9	0.105324	0.0303639	0.0343372	0.106519	0.0398516	0
Aqr	55.2023	43.3238	41.7212	43.4101	47.2737	56.9907
Ar	0.0460027	0.0663168	0.0299973	0	0.417772	1.02081
Araf	18.4537	19.0179	28.238	32.1774	20.4535	18.2402
Arap1	8.01773	7.25543	7.37707	7.57446	7.46562	8.69275
Arap2	0.403798	0.693356	0.620235	0.341225	3.70103	1.52326
Arap3	2.13663	1.60063	2.60433	2.49544	14.0684	3.3485
Arc	9.79814	10.1081	6.64025	6.54291	6.98962	4.62656
Arcn1	47.9989	43.3129	42.5574	36.1467	50.3193	45.2024
Areg	0	0.0373575	0	0	0.196116	0.0718802
Arel1	8.29318	10.6907	7.82728	6.82912	9.35384	8.66975
Arf1	165.5	171.752	164.185	179.413	256.839	282.007
Arf2	8.06721	7.20429	8.38597	11.3587	14.9656	11.4208
Arf3	55.0955	57.4098	50.9033	43.8942	84.5639	63.1965
Arf4	75.5749	67.4173	80.9627	80.4329	88.6921	75.3846
Arf5	152.765	176.179	166.371	190.306	201.934	160.946
Arf6	74.528	65.9131	50.5586	49.5514	69.1855	73.8951
Arfgap1	15.0881	15.314	11.8556	13.7155	21.8624	21.6217
Arfgap2	7.37678	8.42538	7.38099	9.45408	16.5635	17.4966
Arfgap3	4.5018	5.3761	5.55838	7.17686	6.18889	5.20169
Arfgef1	8.01263	9.09446	10.6702	9.08206	16.5779	13.33
Arfgef2	9.0433	10.2436	8.3837	7.6259	11.7882	13.4586
Arfip1	11.1607	9.7985	11.5577	11.5834	11.1117	12.3068
Arfip2	10.7517	11.0366	10.0117	12.4731	20.0095	20.4467
Arfrp1	10.434	9.63295	11.0085	11.4527	12.5529	10.5141
Arg1	0	0.0291727	0.0329895	0.204662	0.038287	0
Arg2	0.159584	0.0918973	0.382171	0.0859487	0.442403	0.0589838
Arglu1	75.8099	57.0308	79.5786	63.5811	72.0059	64.0786
Arhgap1	18.3328	18.846	13.0105	14.9717	41.7331	24.3284
Arhgap10	4.7956	5.03102	6.38466	5.99111	12.5315	11.1743
Arhgap11a	19.4269	17.4	15.9501	16.3012	20.2898	18.8434
Arhgap12	16.5296	14.3416	17.4749	15.1476	8.87955	8.99695
Arhgap17	13.3452	13.3081	11.4207	12.4855	13.9594	12.3305
Arhgap18	0.583944	1.44465	0.687855	0.624863	1.4113	1.04499
Arhgap19	22.7613	27.0289	25.717	24.4847	17.7908	18.8168
Arhgap20	0.0729964	0.0300658	0.0679989	0.0674969	0.126269	0.094037
Arhgap20os	2.01255	1.21853	1.44357	1.30265	1.33269	1.38847
Arhgap21	6.18689	7.53093	6.25974	6.10863	19.4068	13.2952
Arhgap22	3.86795	4.63116	3.45052	4.65075	5.24461	5.90087
Arhgap23	9.20761	10.0876	6.7274	6.44528	17.6774	7.97157
Arhgap24	0.122747	0.16054	0.0998879	0.132419	0.497983	0.421219
Arhgap25	0.0406521	0	0.0132511	0	0.0153797	0
Arhgap26	0.993263	0.842278	0.821851	1.14804	0.720107	1.75029
Arhgap27	1.98301	2.65566	2.06827	1.30363	4.04715	3.86175
Arhgap27os3	0	0	0	0	0	0
Arhgap28	4.1607	3.21101	3.54096	2.7968	3.88126	2.39882
Arhgap29	8.31043	8.85624	9.67196	7.73449	15.0962	5.86496
Arhgap30	4.47075	2.18869	6.06533	7.36789	1.06725	2.7465
Arhgap31	0.0427168	0.0295584	0.0947059	0.0483858	0.239224	0.293848
Arhgap32	5.70823	5.80896	5.5532	5.32577	4.81421	7.79785
Arhgap33	1.5392	1.4165	1.44975	2.03782	1.34134	1.05226
[truncated: 16,532 more rows]

## Sheet: Figure 3-figure supplement 1E
ProApop	Fb19vsBira		AntiApop	Fb19vsBira
Clu	0.585217		Ackr3	0.902374
Ripk3	0.433382		Park2	0.796859
Bad	0.421931		Bdkrb2	0.790349
Nkx3-1	0.361953		Bag5	0.685871
Steap3	0.349226		Tpt1	0.6408
Nacc2	0.331008		Clu	0.585217
Prkra	0.323962		Ccar2	0.486921
Nck2	0.288118		Bcl2l1	0.423561
Plscr1	0.265157		Bcl2l2	0.393023
Casp3	0.229024		Nol3	0.359058
Fbxo18	0.224542		Bcl2l12	0.301252
Rps7	0.211733		Pttg1ip	0.274885
Bbc3	0.188412		Src	0.252826
Mcl1	0.170854		Creb3	0.247041
Pmaip1	0.166937		Hspb1	0.242257
Bax	0.159966		Snai2	0.239835
Bok	0.159919		Pink1	0.231445
Il20ra	0.109379		Mmp9	0.212351
Lck	0.0971369		Grina	0.203372
Park7	0.087876		Mdm2	0.197468
Trp73	0.0810319		Mapk8ip1	0.187193
Rpl11	0.075161		Ndufs3	0.185455
Rad9a	0.066957		Tmem161a	0.183634
Fis1	0.0516859		Vnn1	0.18158
Serinc3	0.043144		Mcl1	0.170854
Ubb	0.0315855		Nme5	0.166624
Siah1a	0.00784474		Ppif	0.153676
Nox1	0.00510961		Parl	0.15346
Rps3	0.000526797		Plaur	0.152751
Fbxw7	-0.033052		Txndc12	0.151247
Sh3glb1	-0.0427276		Gpx1	0.130765
Pias4	-0.0581256		Bcl2	0.127313
Nck1	-0.0793447		Map2k1	0.120125
Flcn	-0.0874522		Pgap2	0.117374
Trp53	-0.12208		Wfs1	0.117144
Plekhf1	-0.124523		Ndufa13	0.111697
Slc9a3r1	-0.148937		Triap1	0.106269
Casp9	-0.151547		Tmbim6	0.0991008
Sirt1	-0.153327		Hif1a	0.088629
Sfpq	-0.166605		Park7	0.087876
Eif2ak3	-0.202464		Trap1	0.081171
Bcl2l11	-0.229599		Ikbkg	0.0784911
Bub1	-0.24493		Snai1	0.0721676
Dnm1l	-0.265119		Nono	0.0563839
Mtch2	-0.26726		Mif	0.0335116
Ptpn2	-0.276142		Nfe2l2	0.00300239
Bcap31	-0.276449		Usp47	-0.00758447
Sod1	-0.293081		Lrrk2	-0.00829601
Ralbp1	-0.33134		Cxcl12	-0.0147483
Ei24	-0.333766		Pdx1	-0.0208701
Bclaf1	-0.334881		Sh3glb1	-0.0427276
Plagl2	-0.342793		Cd44	-0.0526452
Skil	-0.344743		Mapk7	-0.0727051
Msx1	-0.375395		Ptpn1	-0.0856796
Spop	-0.470899		Ybx3	-0.0903025
Cyct	-0.612513		Trim32	-0.0927446
Rpl26	-1.53674		Armc10	-0.0935927
			Vdac2	-0.0948334
			Bid	-0.103076
			G2e3	-0.105221
			Hdac1	-0.109041
			Opa1	-0.114585
			Bcl2l10	-0.128397
			Sod2	-0.137865
			Creb3l1	-0.144117
			Rrm2b	-0.147793
			Epo	-0.151696
			Sirt1	-0.153327
			Syvn1	-0.1708
			Ell3	-0.173312
			Fignl1	-0.179836
			Cep63	-0.181941
			Hdac2	-0.188457
			Hsph1	-0.195876
			Kdm1a	-0.197658
			Rrn3	-0.213473
			Ivns1abp	-0.221252
			Cdkn2d	-0.256702
			Ptgs2	-0.257282
			Uri1	-0.280704
			Xbp1	-0.286131
			Zfp385a	-0.306581
			Ddx3x	-0.312254
			Hyou1	-0.317062
			Dnaja1	-0.317484
			Herpud1	-0.373059
			Hells	-0.557633
			Cd74	-1.32196
