# Supplementary material for: Yap1 safeguards mouse embryonic stem cells from excessive apoptosis during differentiation
Source: eLife. 2018 Dec 18;7:e40167. doi: 10.7554/eLife.40167 (PMC6307859; doi:10.7554/eLife.40167)
Supplement: Figure 4—source data 1. [file elife-40167-fig4-data1.xlsx]

## Sheet: Figure 4A - Source Data 1
Gene	Yap1KDvsemp_L+	Yap1KDvsemp_L-	PeakScore_Yap1_-LIF
Tgm1|NM_001161715	-0.989197	-3.63331	0.345
Krt7|NM_033073	0.00458465	-3.45078	0.182
2200002D01Rik|NM_028179	-1.12184	-3.4481	1.413
Cryab|NM_009964	0.0759531	-3.20824	1.979
Anxa2|NM_007585	0.0417405	-3.12784	1.431
Wnt7b|NM_009528	-0.543822	-3.0676	0.449
Wnt6|NM_009526	-0.0932678	-3.06187	1.743
Krt18|NM_010664	-0.574157	-3.01692	1.926
Acta2|NM_007392	-0.0502104	-2.98104	0.135
Folr1|NM_008034	-0.187942	-2.97121	0.236
Anxa1|NM_010730	0.322712	-2.94899	0.297
Krt19|NM_008471	-0.143583	-2.91171	0.85
Tacstd2|NM_020047	0.0688374	-2.88357	1.976
Krt8|NM_031170	-0.223284	-2.87878	1.946
Pmp22|NM_008885	-0.344784	-2.86058	0.218
Edn1|NM_010104	-0.100204	-2.83394	3.24
Igf2|NM_001122736	-0.0397998	-2.82503	0.511
Phldb2|NM_153412	-0.355651	-2.82475	0.756
2310007B03Rik|NM_172411	0.0413823	-2.81019	1.573
Acta1|NM_009606	-0.0918892	-2.77959	0.243
3830417A13Rik|NM_027512	-0.120557	-2.73074	0
Gprc5a|NM_181444	-0.169447	-2.72859	0.702
Thbs1|NM_011580	-0.0237269	-2.68662	1.181
S100a6|NM_011313	-0.878287	-2.68477	0.899
Vgll3|NM_028572	-0.0647914	-2.68111	1.912
Ptrf|NM_008986	-0.367192	-2.66718	1.84
Pcolce|NM_008788	-0.20924	-2.65759	0.573
Tinagl1|NM_023476	-0.311181	-2.60901	1.963
Csf1|NM_007778	0.00915443	-2.6001	1.242
Cd74|NM_010545	0.413702	-2.54957	0.487
Yap1|NM_009534	-2.79202	-2.54864	2.229
Wnt10a|NM_009518	-0.100147	-2.54815	1.183
Anxa3|NM_013470	-0.623958	-2.52967	0.607
Tagln|NM_011526	-0.443966	-2.48536	2.926
Ahnak|NM_009643	-0.281236	-2.39181	0.67
Gng13|NM_022422	-0.314578	-2.39154	0.853
Dusp14|NM_019819	-0.189715	-2.36397	1.615
Itga3|NM_013565	-0.609425	-2.35213	1.597
Sfn|NM_018754	-0.138727	-2.34303	2.031
Plaur|NM_011113	0.0510894	-2.34203	0.852
Ier3|NM_133662	0.111992	-2.33396	2.067
Bcam|NM_020486	-0.949037	-2.30085	2.51
Gbp2|NM_010260	0.0588883	-2.26353	2.541
Cited1|NM_007709	-0.229352	-2.25098	0.423
Lamb3|NM_008484	-0.268275	-2.22697	0.944
Col1a1|NM_007742	-0.429098	-2.22137	0.364
Cxcl16|NM_023158	-0.238118	-2.2175	2.195
Bmp8b|NM_007559	-0.272049	-2.21362	0.995
Cited4|NM_019563	0.00902295	-2.18938	0.813
Capn2|NM_009794	-1.25808	-2.18553	1.068
Glipr2|NM_027450	-0.0592529	-2.18109	2.4
Cxcl10|NM_021274	0.617101	-2.17118	0.728
S100a10|NM_009112	-0.484183	-2.16981	0.855
Mixl1|NM_013729	-0.125663	-2.16239	1.993
Lamc2|NM_008485	-0.2971	-2.15848	2.794
Dnmt3l|NM_019448	-1.48168	-2.15567	0.375
S100a11|NM_016740	-0.153467	-2.14932	1.297
Wnt4|NM_009523	0.04135	-2.14614	1.151
Tnfrsf12a|NM_013749	-0.813992	-2.14593	1.173
Serpine1|NM_008871	0.566705	-2.14469	0.182
Cald1|NM_145575	-0.359651	-2.14435	0.425
Prss23|NM_029614	-0.0665078	-2.14343	0.694
Flt1|NM_010228	-0.167451	-2.14243	1.163
Card10|NM_130859	-0.068756	-2.12882	1.763
Arhgdib|NM_007486	-0.665307	-2.12488	0.727
Mesp1|NM_008588	0.364687	-2.11043	0.505
Tpm1|NM_024427	0.0980923	-2.10042	2.399
Pim1|NM_008842	-0.571982	-2.07926	1.776
Mme|NM_008604	-0.753513	-2.07391	3.601
Ltb|NM_008518	-0.0311811	-2.06821	0.303
Myo1c|NM_001080775	-0.43794	-2.06705	1.578
Gata3|NM_008091	0.00476151	-2.05509	0.991
Peg3|NM_008817	0.110674	-2.03164	0.962
Nuak1|NM_001004363	-0.193039	-2.00966	1.233
Sct|NM_011328	0.647203	-2.00129	0.728
Axl|NM_009465	0.448571	-1.98573	0.974
Dok2|NM_010071	-0.020239	-1.9546	0.557
Clu|NM_013492	-0.193645	-1.94828	1.752
Bcl3|NM_033601	0.243231	-1.9474	1.092
Sp5|NM_022435	0.185818	-1.9469	4.366
Col5a1|NM_015734	0.149528	-1.93747	0.854
Rbms1|NM_020296	-0.707785	-1.93637	0.522
Pawr|NM_054056	-0.351938	-1.93622	1.557
Gsn|NM_146120	-0.414169	-1.93089	0.303
Cyr61|NM_010516	-1.13213	-1.90183	4.579
Gadd45b|NM_008655	0.579047	-1.89192	1.578
Efemp1|NM_146015	-0.0208383	-1.88969	2.15
Pdgfb|NM_011057	0.0873585	-1.88609	0.537
F5|NM_007976	-0.220073	-1.88545	2.027
Efnb1|NM_010110	-0.134059	-1.86407	0.633
Lmna|NM_001111102	0.0686974	-1.85359	0.722
Tgfb2|NM_009367	-0.0488527	-1.85209	0.875
Lfng|NM_008494	0.184174	-1.84999	1.264
Fhod1|NM_177699	-0.243035	-1.84978	1.051
Morc4|NM_029413	-0.235022	-1.83327	0.425
Cgn|NM_001037711	-0.340649	-1.83074	1.164
Dsc2|NM_013505	-0.0272644	-1.82703	0.667
Bmp1|NM_009755	-0.379549	-1.8201	1.125
Cdc42ep1|NM_027219	-0.375668	-1.81903	1.435
Myadm|NM_001093766	-0.466607	-1.8187	1.949
Hspb2|NM_024441	0.327163	-1.81679	0.851
Tgfb1i1|NM_009365	-0.263983	-1.8117	0.386
Arap3|NM_001205336	-0.044257	-1.79294	0.404
Sema3b|NM_001042779	-0.480657	-1.78087	1.396
T|NM_009309	0.0648882	-1.77413	1.675
Kirrel|NM_130867	0.105482	-1.77195	1.309
Amotl2|NM_019764	-1.09231	-1.77049	10.512
Tead3|NM_011566	0.0891594	-1.76942	1.226
Samd4|NM_001163433	-0.0522373	-1.76193	0.121
Lgals1|NM_008495	-0.485594	-1.76097	0.97
Lats2|NM_015771	-0.405844	-1.75485	5.951
Fam46b|NM_175307	-0.18777	-1.75405	1.578
Dsp|NM_023842	-0.0113054	-1.75333	1.109
Cited2|NM_010828	-0.188209	-1.74085	2.393
Kremen2|NM_028416	-0.0809321	-1.73957	1.686
Flnb|NM_134080	-0.254966	-1.73586	1.232
Myl9|NM_172118	-1.30492	-1.73451	1.698
Sema3e|NM_011348	-0.0479024	-1.73386	1.171
Parva|NM_020606	-0.248754	-1.72817	0.725
Dkk1|NM_010051	0.239325	-1.72444	0.978
Serpinh1|NM_009825	-0.192727	-1.72434	2.199
Nedd9|NM_001111324	0.0141397	-1.70939	0.061
Pdlim2|NM_145978	-0.560589	-1.70831	0.672
Arsi|NM_001038499	0.230698	-1.70614	0.351
Lrp2|NM_001081088	-0.274381	-1.70342	3.15
Gpr4|NM_175668	-0.404002	-1.69869	1.397
Arhgap8|NM_028455	-0.0426809	-1.69232	1.146
Phlda1|NM_009344	-0.0188474	-1.67933	1.543
Col2a1|NM_031163	-0.171236	-1.67641	0.85
Esx1|NM_007957	-1.14204	-1.67473	0.243
Tmsb4x|NM_021278	-0.342155	-1.67003	0.365
Sparc|NM_009242	0.0588438	-1.66366	1.908
Ankrd1|NM_013468	0	-1.65697	0.866
F3|NM_010171	-0.340507	-1.65623	1.388
Colec12|NM_130449	-0.279673	-1.65273	1.207
Fgf22|NM_023304	-0.371796	-1.65231	0.425
Igfbp3|NM_008343	-0.522458	-1.65084	2.372
Hand1|NM_008213	0.0238297	-1.64856	0.472
Ecscr|NM_001033141	-0.0599621	-1.64783	0.491
Loxl4|NM_053083	0.0661033	-1.64156	1.252
Wwc2|NM_133791	-1.00281	-1.64044	5.21
Krt14|NM_016958	0.0996941	-1.6281	0.121
Chst12|NM_021528	0.112546	-1.62347	2.333
Ptpn14|NM_008976	-0.620964	-1.61392	10.036
Agpat9|NM_172715	0.00420983	-1.60653	0.889
Itga5|NM_010577	-0.0839779	-1.60606	3.983
Plau|NM_008873	0.209625	-1.6004	0.57
Cxcl11|NM_019494	0.0287456	-1.5914	1.661
Tagln2|NM_178598	-0.154283	-1.59003	3.812
Cpz|NM_153107	-0.0578075	-1.58847	1.578
Anxa5|NM_009673	0.136733	-1.58615	1.233
Chst15|NM_029935	-0.0256598	-1.579	5.446
Adam8|NM_007403	-0.102829	-1.57748	0.34
Slc4a11|NM_001081162	0.117846	-1.57614	0.978
Flrt3|NM_178382	0.0686151	-1.57412	1.033
Ddah1|NM_026993	-0.984877	-1.57267	1.359
Amot|NM_153319	-0.204859	-1.56593	0.009
AU018091|NM_001004153	-0.333728	-1.55955	0.243
Nox4|NM_015760	-0.271733	-1.55707	1.046
Flnc|NM_001081185	-0.242218	-1.55481	2.835
Steap1|NM_027399	-0.518986	-1.55401	0.898
Pdgfrl|NM_026840	-0.108614	-1.54683	0.546
Cgref1|NM_026770	-0.767662	-1.53774	0.728
Slc5a5|NM_053248	0.193732	-1.53734	1.11
Nab2|NM_008668	0.0914688	-1.53441	1.035
Cdx1|NM_009880	-0.0207026	-1.53351	2.761
Hbegf|NM_010415	0.141471	-1.53326	1.817
Igdcc3|NM_008988	0.0665021	-1.53284	1.46
Ghr|NM_010284	-0.169676	-1.52747	0.85
Agrn|NM_021604	-0.314787	-1.52528	1.278
Rin3|NM_001161365	-0.247568	-1.52434	0.313
Tceal5|NM_177919	-1.00894	-1.52004	1.174
Col4a2|NM_009932	0.0592552	-1.51899	0.76
Gbp3|NM_018734	-0.0362547	-1.51728	0.522
Cnn1|NM_009922	-0.688724	-1.51393	0.893
Csrp1|NM_007791	0.446468	-1.51075	2.233
Mmp9|NM_013599	-0.00070294	-1.51037	0.411
Lmod1|NM_053106	-0.244107	-1.50901	1.032
AA986860|NM_177604	-0.137208	-1.50821	1.085
Isg15|NM_015783	0.0453243	-1.50523	0.667
Gjb3|NM_001160012	0.320978	-1.50055	0.499
Kynu|NM_027552	0	-1.49895	0.91
Cmtm7|NM_133978	0.0299878	-1.49378	1.82
Serpinb8|NM_011459	-0.224011	-1.49364	0.286
Synpo2l|NM_175132	-0.0121242	-1.49233	0.113
Papss2|NM_011864	-0.0568566	-1.48986	0.061
Nfkb2|NM_001177370	0.0539335	-1.48821	1.308
Pfkfb3|NM_001177758	-0.00444255	-1.48656	0.667
Ehd2|NM_153068	-0.117994	-1.48437	0.787
Gprc5c|NM_147217	-0.28672	-1.48294	1.788
Pdzk1ip1|NM_026018	0.662878	-1.47741	0.693
Synj2|NM_011523	0.152506	-1.47294	0.243
Plin2|NM_007408	0.102691	-1.46631	0.605
She|NM_172530	0.131172	-1.46458	0.432
Map3k14|NM_016896	0.223301	-1.46381	1.338
Egfr|NM_207655	-0.146388	-1.46359	0.417
Vgll4|NM_177683	-0.0827588	-1.46278	0.91
Sprr1a|NM_009264	0	-1.45975	0.416
Steap3|NM_001085409	-0.72922	-1.45701	0.119
Slco2a1|NM_033314	-0.0592222	-1.45249	0.851
Cldn4|NM_009903	-0.0851949	-1.45181	4.374
Ddr1|NM_172962	-0.193771	-1.45177	1.363
Fgf8|NM_010205	0.286421	-1.4497	0.306
Tmem176b|NM_001164208	0.106226	-1.44831	0.221
Cth|NM_145953	-0.0778185	-1.44713	0.992
Creb3|NM_013497	0.016226	-1.44412	1.651
Slc38a4|NM_027052	-0.14974	-1.44409	0.364
Rnaset2a|NM_001083938	0.223856	-1.43917	0.667
Pkp3|NM_019762	0.282134	-1.43499	0.397
Tmem125|NM_172383	-0.308123	-1.43489	2.174
Limch1|NM_001256122	0.183316	-1.43312	0.54
Plekhg2|NM_138752	-0.28562	-1.43195	3.499
Ifitm3|NM_025378	0.462548	-1.42928	0.557
Slc25a24|NM_172685	-0.269456	-1.42648	0.667
Lrrk1|NM_146191	-0.0122878	-1.42645	0.548
Abtb2|NM_178890	-0.0938448	-1.42589	0.797
Tln1|NM_011602	-0.400975	-1.42361	1.676
Itpkb|NM_001081175	-0.181203	-1.41463	0.578
Tnnt3|NM_011620	0	-1.41403	0.349
Chrnb1|NM_009601	-0.147981	-1.41367	1.104
Osbpl5|NM_024289	0.055949	-1.41316	0.068
Hspg2|NM_008305	-0.350926	-1.4038	1.151
Lpp|NM_001145954	-0.296686	-1.40366	0
Gcnt1|NM_010265	-0.181845	-1.40224	0
Wisp1|NM_018865	0.0354543	-1.40156	0.944
Cnn2|NM_007725	-0.526535	-1.3998	1.492
Perp|NM_022032	-0.46189	-1.39697	1.335
Rab32|NM_026405	0.114412	-1.39643	0.349
Fgf13|NM_010200	-0.416959	-1.39569	0.121
Tor2a|NM_152800	0.217562	-1.3953	1.868
Trim67|NM_198632	0.0103163	-1.39369	2.326
Tgm2|NM_009373	0.728968	-1.3911	0.485
Sorbs3|NM_011366	-0.208324	-1.38582	0.323
Mapkapk2|NM_008551	-0.150609	-1.3855	1.817
Nog|NM_008711	-0.258416	-1.38544	0.317
Stmn4|NM_019675	0	-1.38465	0.381
Eps8l2|NM_133191	-0.0500489	-1.38302	0.945
Wls|NM_026582	-0.322343	-1.3827	1.004
Ccrn4l|NM_009834	-0.27567	-1.38254	2.891
Plk2|NM_152804	-0.427183	-1.37975	1.265
Palm3|NM_028877	-0.29934	-1.37845	3.124
Il15ra|NM_008358	0.062918	-1.37381	0.822
Syde1|NM_027875	-0.326195	-1.3708	1.942
Krtdap|NM_001033131	0.703648	-1.36063	0.639
9130008F23Rik|NM_027834	-0.0147477	-1.35448	0.835
Sidt2|NM_172257	-0.481557	-1.34874	1.161
Socs3|NM_007707	-0.139659	-1.34815	1.583
Daam1|NM_172464	-0.105871	-1.34809	0.868
Wnt3|NM_009521	-0.024976	-1.34748	1.032
Tspan9|NM_175414	0.201417	-1.3474	0.7
Dusp9|NM_029352	-0.431595	-1.34456	0.425
Fndc3b|NM_173182	0.162426	-1.34056	0.924
Zfp185|NM_009549	-0.642854	-1.34035	1.699
Frmd4b|NM_145148	0.132176	-1.33989	0.91
Tgfb1|NM_011577	0.0769704	-1.33752	0.638
Serpinb9b|NM_011452	0.233692	-1.33718	0.425
Slc16a10|NM_028247	-0.485174	-1.33611	0.921
Wnt7a|NM_009527	-0.104606	-1.33393	0.133
Maff|NM_010755	-0.059909	-1.33349	2.233
Shisa4|NM_175259	-0.511998	-1.33068	1.098
Slc2a3|NM_011401	-0.210239	-1.32984	2.97
Ptprm|NM_008984	-0.00303664	-1.32651	1.499
Scarf2|NM_153790	-0.0667905	-1.32513	1.303
Slc30a2|NM_001039677	0.0492564	-1.32059	0.997
Kctd12b|NM_175429	-0.0978351	-1.31793	0.425
Batf3|NM_030060	-0.0593762	-1.3179	0.688
Flot1|NM_008027	0.0943762	-1.3168	0.803
Serinc2|NM_172702	-0.164884	-1.31667	0.749
Dab2|NM_023118	0.240323	-1.31589	1.51
Nlrp9b|NM_194058	0.326681	-1.31569	0.061
AI661453|NM_145489	-0.165428	-1.31217	4.187
Lipg|NM_010720	-0.204413	-1.30882	0.728
Tnfaip3|NM_009397	-0.0520413	-1.30297	1.743
Scube3|NM_001004366	-0.39268	-1.30238	0.464
Sh3bp5|NM_011894	0.0545264	-1.29995	1.092
Wfdc2|NM_026323	-0.0590423	-1.2992	0.91
Gpx8|NM_027127	-0.707492	-1.29866	1.426
Nipal4|NM_172524	-0.0368355	-1.29824	0.472
Ppp1r18|NM_175242	-0.0145126	-1.29552	1.247
Gsc|NM_010351	0.0662615	-1.29334	0.724
Col4a1|NM_009931	-0.222406	-1.29203	0.762
Arl4c|NM_177305	-0.457383	-1.29175	3.859
Gpc4|NM_008150	-0.179442	-1.28691	0.624
Fam107b|NM_025626	-0.166191	-1.28449	0.806
Zc3h12a|NM_153159	-0.130694	-1.2832	1.028
Plec|NM_011117	-0.0234844	-1.28279	0.497
Cd44|NM_009851	-0.0697239	-1.28113	0.628
Cdk18|NM_008795	0.0365602	-1.28054	0.643
Hspb1|NM_013560	-0.37074	-1.27734	1.882
Nppb|NM_008726	0.132034	-1.27484	0.887
Psca|NM_028216	0	-1.27381	0.061
Bbx|NM_027444	-0.336225	-1.27097	0.873
Baz1a|NM_013815	-0.553951	-1.269	0.946
Vwa5a|NM_172767	0.0245554	-1.26823	0.303
Alox15|NM_009660	-0.475497	-1.26798	0.6
Arid3a|NM_007880	0.110121	-1.26669	2.019
Bhlhe40|NM_011498	0.284399	-1.26621	0.958
Gsdmd|NM_026960	-0.143112	-1.26568	0.667
Irs2|NM_001081212	-0.461157	-1.2654	1.019
Ngfrap1|NM_009750	-0.618813	-1.26392	0.667
Fosl2|NM_008037	-0.0244328	-1.26185	0.759
Trpv2|NM_011706	0.226326	-1.26069	0.061
Actn1|NM_134156	-0.0630731	-1.26035	1.596
Pcdhgc3|NM_033581	-0.152006	-1.25816	0.707
Tfap2a|NM_011547	0.319653	-1.25768	1.189
Syt17|NM_138649	-0.499678	-1.25748	0.121
Bmp8a|NM_007558	-0.390256	-1.25497	3.353
Litaf|NM_019980	0.229469	-1.25343	0.546
Specc1|NM_001029936	0.175518	-1.25294	1.861
Bgn|NM_007542	-0.114745	-1.25187	0.061
Ptgs2|NM_011198	0.0737109	-1.24963	1.223
Fstl1|NM_008047	-0.611701	-1.24788	0.061
Vgf|NM_001039385	-0.348454	-1.24751	0.794
Radil|NM_178702	0.198838	-1.24743	2.281
Zfpm1|NM_009569	-0.186866	-1.24681	1.522
Fam101b|NM_029658	-0.140649	-1.24654	1.043
Rnd3|NM_028810	0.0210286	-1.24564	1.051
Sfmbt2|NM_177386	0.11324	-1.24499	0.743
Zyx|NM_011777	-0.0988299	-1.24466	2.269
Stx11|NM_029075	0.296386	-1.24433	1.425
Wdr45|NM_172372	0.525766	-1.24422	0.643
Emp3|NM_010129	0.407465	-1.24338	0.022
Stmn2|NM_025285	0.0410474	-1.24185	0.85
Mid1|NM_183151	-0.173231	-1.24134	0.803
Arpc5|NM_026369	-0.830467	-1.23825	2.693
Rrad|NM_019662	0.144154	-1.23615	0.528
Phldb1|NM_153537	-0.195375	-1.23446	0.853
Vasn|NM_139307	0.269302	-1.23433	0.364
Mfge8|NM_008594	0.295842	-1.234	0.971
Msrb3|NM_177092	-0.430975	-1.23376	0.705
Pard6b|NM_021409	-0.0870243	-1.23206	2.873
Ikbke|NM_019777	0.157613	-1.23171	0.364
Pdlim7|NM_026131	-0.211971	-1.23113	2.013
Madcam1|NM_013591	-0.22789	-1.22986	1.456
Arhgap29|NM_172525	-0.28903	-1.2294	0.746
Tspan2|NM_001243132	-0.19232	-1.22842	0.575
Rhbdf1|NM_010117	-0.116242	-1.22573	4.028
Ccdc120|NM_207202	0.106536	-1.22526	0.243
Emp2|NM_007929	-0.297846	-1.22295	0.558
Tmem88|NM_025915	-0.48135	-1.2229	4.053
Tmbim1|NM_027154	0.21032	-1.21633	1.245
Hyal1|NM_008317	-0.153313	-1.21498	0.458
Gadd45g|NM_011817	0.896908	-1.21475	1.554
Pvr|NM_027514	-0.093138	-1.21216	1.336
Jph2|NM_001205076	-0.141075	-1.21123	0.484
Crip2|NM_024223	0.096079	-1.21085	2.117
Cpxm2|NM_018867	0.0653067	-1.21053	0.403
Clcn5|NM_001243762	-0.123293	-1.20828	0.893
A4galt|NM_001004150	0.0886746	-1.20702	1.681
Rnf128|NM_023270	-0.461912	-1.20628	0.755
Psors1c2|NM_020576	0.391699	-1.20448	1.277
BC023829|NM_001033328	0.0208015	-1.20337	0.404
Fam83h|NM_134087	-0.410553	-1.19911	0.233
Cyp2s1|NM_028775	-0.0707138	-1.19801	1.108
Agpat4|NM_026644	-0.100177	-1.19562	1.134
Endod1|NM_028013	-0.214936	-1.19183	0.917
Plek2|NM_013738	0.0348154	-1.19126	0.513
S100a3|NM_011310	0.166968	-1.19088	0.243
Pramef12|NM_029948	-0.107877	-1.19044	0.247
Zc3hav1|NM_028864	0.0825111	-1.18846	1.331
Nfkbie|NM_008690	-0.188071	-1.18291	0.971
Mpzl2|NM_007962	-0.0649791	-1.18286	1.25
Pgf|NM_008827	-0.326967	-1.18191	0.667
H2-Q7|NM_010394	-0.444689	-1.17921	1.756
Lhfp|NM_175386	-0.146433	-1.17899	0.648
Icam1|NM_010493	0.0925551	-1.17716	1.517
Timp2|NM_011594	-0.487282	-1.17425	1.18
Eno3|NM_007933	-0.954908	-1.17391	0.203
Frmd6|NM_028127	-0.127369	-1.17385	1
Afap1|NM_027373	-0.418424	-1.17191	0.726
Plac8|NM_139198	-0.610112	-1.17181	0.182
Rock2|NM_009072	-0.205513	-1.17178	3.693
Tax1bp3|NM_029564	-0.227284	-1.16932	1.352
Fndc3c1|NM_001007580	-0.212316	-1.166	0.875
Epha2|NM_010139	-0.192205	-1.16299	1.053
Ccdc68|NM_201362	-0.0952491	-1.16289	0.667
Bex1|NM_009052	-0.481503	-1.16185	1.422
Tap2|NM_011530	-0.0869488	-1.16056	1.007
Nbl1|NM_008675	-0.490998	-1.15878	0.587
Arhgef5|NM_133674	-0.277143	-1.1535	0.711
Bcl9l|NM_030256	0.289199	-1.14777	2.192
Atf3|NM_007498	0.0062529	-1.14647	2.171
Tmprss2|NM_015775	0.00484708	-1.14577	0.777
Dhrs11|NM_177564	-0.131414	-1.14113	1.004
Mcc|NM_001085373	0.100847	-1.14049	0.941
Myl12a|NM_026064	-0.282062	-1.13726	2.364
Rdh10|NM_133832	-0.139485	-1.13637	0.902
Hmgn3|NM_175074	0.0320392	-1.13587	0.667
Calcoco2|NM_029755	0.0306529	-1.1349	0.91
Rin1|NM_145495	-0.200685	-1.13432	1.244
Lrch4|NM_146164	-0.261954	-1.13429	0.807
Cnksr1|NM_001081047	-0.388487	-1.13415	1.456
Junb|NM_008416	0.300653	-1.13227	2.272
Tapbp|NM_009318	0.413146	-1.13104	2.123
Icosl|NM_015790	-0.369666	-1.12786	1.361
Pld2|NM_008876	-0.20668	-1.1274	1.664
Pcgf5|NM_029508	-0.457823	-1.12651	0.061
Isg20|NM_001113527	0.274918	-1.12511	0.525
Acot9|NM_019736	0.0183223	-1.12283	1.324
Efna5|NM_207654	-0.00355776	-1.12162	0.546
Nexn|NM_199465	-0.440705	-1.12149	0.737
Tubb6|NM_026473	-0.132144	-1.11924	0.894
Loxl1|NM_010729	-0.333507	-1.1187	1.125
Id2|NM_010496	-1.1101	-1.11818	1.326
Llgl2|NM_145438	-0.117061	-1.1156	1.347
Tpm4|NM_001001491	-0.227269	-1.1146	1.165
Rras|NM_009101	0.127787	-1.10272	0.825
Amotl1|NM_001081395	-0.361449	-1.10196	0.912
Pstpip2|NM_013831	-0.0439429	-1.10135	1.044
S100a4|NM_011311	0	-1.10097	0.121
Bik|NM_007546	0.291116	-1.10001	0.29
Nt5e|NM_011851	0.512248	-1.09993	0.522
Snai3|NM_013914	0.214071	-1.0975	0.661
Pglyrp2|NM_021319	-0.0548336	-1.09722	0.002
Phldb3|NM_001102613	0.101455	-1.09653	0.457
Ets1|NM_011808	-0.127705	-1.09209	1.459
Fermt1|NM_198029	-0.136819	-1.09004	0.682
Tspan18|NM_183180	-0.0722437	-1.08824	0.679
Bcar1|NM_009954	-0.320136	-1.08803	0.654
Hmga2|NM_010441	-0.570553	-1.08771	0.954
Paqr4|NM_023824	0.0233418	-1.0872	1.422
Mapre3|NM_133350	-0.103534	-1.08554	0.678
Slc35f5|NM_028787	-0.0395034	-1.085	1.555
Marveld2|NM_001038602	-0.388415	-1.08427	1.032
Klk10|NM_133712	-0.377444	-1.08269	0.182
H2-M2|NM_008204	0	-1.0826	0.503
Msx2|NM_013601	-0.322013	-1.08169	1.115
Erbb3|NM_010153	0.248297	-1.07987	1.016
Irs1|NM_010570	-0.0561462	-1.07599	2.482
Uprt|NM_001081189	0.0801094	-1.07486	0.243
Pla2g7|NM_013737	-0.0464487	-1.07473	1.032
Mvp|NM_080638	0.347018	-1.07348	0.453
Pim3|NM_145478	-0.114341	-1.07341	2.313
Mras|NM_008624	-0.494298	-1.07256	0.252
Ppp4r4|NM_028980	0.0749594	-1.07233	1.333
Prkcdbp|NM_028444	-0.220034	-1.07062	1.857
Errfi1|NM_133753	-0.15804	-1.06858	1.699
Crlf1|NM_018827	0.0450877	-1.06764	0.122
Ldlrap1|NM_145554	-0.269456	-1.06615	0.929
Cdcp1|NM_133974	0.173036	-1.06585	0.568
Mboat1|NM_153546	-0.304786	-1.06516	0.728
Basp1|NM_027395	-0.529152	-1.06318	0.612
Pkp2|NM_026163	-0.127631	-1.06179	1.153
Sdc3|NM_011520	-0.229487	-1.0615	0.608
Pde1b|NM_008800	-0.399871	-1.06144	0.886
Adm|NM_009627	0.439989	-1.06021	0.755
Pitx2|NM_001042502	0.0611766	-1.05927	2.305
Eml2|NM_028153	0.348864	-1.05926	0.667
Irak3|NM_028679	-0.135631	-1.05828	0.303
Arhgap23|NM_021493	-0.053657	-1.05786	0.744
Prr5l|NM_001110849	-0.695257	-1.05764	0.061
Myh9|NM_022410	0.0286217	-1.05692	1.811
Tmcc3|NM_177026	0.0234124	-1.05671	0.095
9930012K11Rik|NM_001112735	-0.221097	-1.05602	1.322
Zbtb32|NM_021397	-0.279758	-1.05411	0.364
Igfbp6|NM_008344	-0.370585	-1.05307	0.301
Wnt9a|NM_139298	0.103066	-1.05185	2.306
Elk3|NM_013508	-0.12591	-1.05054	0.338
Cd82|NM_001136055	0.392093	-1.04889	0.962
Glis2|NM_031184	-0.0806228	-1.0477	0.774
H2-K1|NM_001001892	-0.148391	-1.04586	0.613
Itpripl2|NM_001033380	-0.0578194	-1.04466	1.236
Relb|NM_009046	0.199992	-1.04062	1.032
Adamts7|NM_001003911	0.040335	-1.03999	0.704
Prnd|NM_023043	-0.00993102	-1.03881	0.903
Crip1|NM_007763	0.0443617	-1.03842	0.485
Spib|NM_019866	-0.306404	-1.03779	0.409
Zbtb42|NM_001100460	-0.090758	-1.03652	1.098
Ehbp1l1|NM_053252	-0.0892196	-1.03608	0.683
Prph|NM_013639	-0.865542	-1.03589	0.546
Il33|NM_001164724	0.0334641	-1.0351	1.578
Sri|NM_001080974	-0.0496466	-1.0343	1.02
Unc13d|NM_001009573	0.285989	-1.03334	1.127
Nudt11|NM_021431	-0.352664	-1.03298	0.407
Hdac7|NM_001204280	0.220738	-1.03183	0.196
Camk2d|NM_023813	-0.292832	-1.03155	0.913
Rhou|NM_133955	-0.306785	-1.02979	1.289
Epb4.1l1|NM_001006664	-0.120789	-1.02909	1.274
Dse|NM_172508	-0.203773	-1.02763	2.559
Zfp36|NM_011756	-0.0261699	-1.02513	1.798
Tppp3|NM_026481	-0.151342	-1.02451	1.715
Wwtr1|NM_001168281	0.0159619	-1.02397	3.457
AI464131|NM_001085515	0.147221	-1.02366	1.251
Ube2l6|NM_019949	0.0117631	-1.0234	0.237
Mbp|NM_001025254	0.0224247	-1.02123	0.061
Il23a|NM_031252	0.358968	-1.02082	0.359
Abca3|NM_013855	-0.0614269	-1.02077	1.426
Emp1|NM_010128	-0.455885	-1.01993	0.124
H2afy2|NM_207000	-0.251517	-1.01677	0.624
Col6a2|NM_146007	0.128385	-1.01556	0.485
Crim1|NM_015800	-0.163449	-1.01462	0.781
Nkx2-5|NM_008700	-0.0369775	-1.01303	0.585
Rgs16|NM_011267	-0.00797985	-1.01117	1.212
Setd7|NM_080793	-0.451737	-1.00748	0.972
Peg10|NM_130877	-1.52689	-1.00741	1.05
Tmem37|NM_019432	-0.379639	-1.0068	1.461
Ptprn|NM_008985	-0.640806	-1.00624	0.364
Prrg4|NM_178695	-0.654689	-1.0057	1.638
Col5a2|NM_007737	-0.0638118	-1.00481	0.299
Pmepa1|NM_022995	-0.0168213	-1.00443	1.897
Itgb5|NM_010580	-0.507477	-1.00441	1.138
Myl6|NM_010860	0.284071	-1.0041	1.508
Hapln3|NM_178255	-0.113356	-1.0028	0.613
Akap2|NM_001035533	-0.31434	-1.00218	0.061
Plagl1|NM_009538	-0.309305	-1.00191	1.092
Fam43a|NM_177632	-0.559197	-1.00079	1.2
Lasp1|NM_010688	-0.103871	-0.999481	1.166
Tbx20|NM_194263	-0.071015	-0.997503	0.744
Plekha2|NM_031257	0.141526	-0.996688	0.828
Capn6|NM_007603	0.151893	-0.993605	0.243
Fhl3|NM_010213	-0.173448	-0.990558	0.607
Orai1|NM_175423	0.250492	-0.990231	1.706
Metrnl|NM_144797	0.102725	-0.988036	0.684
Erbb2|NM_001003817	-0.417185	-0.987813	2.218
Abcb1b|NM_011075	-0.486853	-0.986017	0.683
Myo18a|NM_011586	-0.245018	-0.984421	0.061
Pcdh7|NM_018764	0	-0.984343	0.665
Sh3rf2|NM_172966	0.0722799	-0.983442	0.369
Nfkbib|NM_010908	-0.818166	-0.981627	1.335
Fgf17|NM_008004	-0.409432	-0.979527	0.577
Tnfaip2|NM_009396	-0.244479	-0.979024	0.389
Tradd|NM_001033161	-0.0698569	-0.978896	0.755
Slc9a1|NM_016981	-0.312153	-0.978375	1.144
Rab3b|NM_023537	0.126312	-0.977389	0.789
Usp2|NM_198091	0.0751675	-0.97585	0.6
Extl1|NM_019578	0.0472468	-0.975531	0.97
Anxa6|NM_013472	-1.58615	-0.974623	0.456
Bend4|NM_001164806	-0.416188	-0.973596	0.897
Ppp1r13l|NM_001010836	-0.0190314	-0.9733	1.869
Arl6ip5|NM_022992	0.101745	-0.97318	1.122
Tuba8|NM_017379	0.229094	-0.972335	0.303
Nefl|NM_010910	-0.567298	-0.971548	0.447
Dock11|NM_001009947	-0.267874	-0.970922	1.183
Lhx1|NM_008498	-0.0235647	-0.96945	0.374
H2-T22|NM_010397	0.343495	-0.968119	0.607
Ssbp3|NM_198438	-0.323899	-0.966381	1.737
Rras2|NM_025846	0.00721656	-0.965229	1.41
Slc26a2|NM_007885	-0.128818	-0.962959	1.1
Rcsd1|NM_178593	0.122499	-0.961843	1.15
Arhgef10l|NM_001112722	0.51159	-0.959638	0.546
Col7a1|NM_007738	-0.0934088	-0.959388	0.265
Cldn6|NM_018777	-0.643482	-0.958675	1.582
Six2|NM_011380	0.122624	-0.957487	1.548
Ilk|NM_010562	-0.0651059	-0.954308	2
Ctdspl|NM_133710	-0.297188	-0.954029	0.77
Prrx2|NM_009116	-0.266132	-0.95389	0.646
Lama5|NM_001081171	-0.639557	-0.952425	2.731
Acot10|NM_022816	-0.0483891	-0.952018	0
Ptrh1|NM_178595	0.354844	-0.951491	1.326
Mob3a|NM_172457	0.0224041	-0.950757	2.042
Matn4|NM_001252563	-0.109275	-0.950017	0.649
Pvrl2|NM_008990	0.00212769	-0.949116	1.748
Sh3bp1|NM_009164	-0.2401	-0.94833	0.675
Nkain4|NM_021426	0.323314	-0.948289	0.607
Rprm|NM_023396	0.242096	-0.947307	1.032
Fam114a1|NM_026667	-0.565764	-0.946557	0.494
Wtip|NM_207212	-0.390192	-0.945228	4.186
Flna|NM_010227	-0.489197	-0.945017	1.285
Nkx6-2|NM_183248	0.0640326	-0.943564	0.879
Rasl10a|NM_145216	0.526206	-0.94302	0.833
Tpm2|NM_009416	-0.453014	-0.941334	0.772
Fstl3|NM_031380	-0.135771	-0.941009	0.462
Gpr56|NM_018882	0.29568	-0.940815	0.544
Itgb4|NM_133663	-0.0337226	-0.93944	1.363
Cul4b|NM_028288	-0.273067	-0.938617	0.07
Serpinb9|NM_009256	0.14938	-0.938602	1.429
Tfeb|NM_011549	0.300118	-0.937384	0.303
Elovl1|NM_001039176	-0.0535073	-0.935894	0.387
Aipl1|NM_053245	0.336721	-0.935653	0.47
Sun2|NM_194342	0.411417	-0.933936	0.985
Rasef|NM_001017427	-0.00909243	-0.93236	0.837
Egr1|NM_007913	0.332779	-0.931724	0.736
Tmem62|NM_175285	-0.0441324	-0.93164	0.747
Vcl|NM_009502	-0.176396	-0.931361	2.567
Actn4|NM_021895	-0.539604	-0.929511	1.888
Arhgef10|NM_172751	-0.354212	-0.928534	0.788
Dio3|NM_172119	0.00991084	-0.926536	0.757
Lsp1|NM_019391	0.034388	-0.924508	0.257
Fut4|NM_010242	0.0180756	-0.924219	0.947
Ptges|NM_022415	0.108467	-0.922642	0.121
Sh3bp4|NM_133816	-0.060005	-0.922632	1.347
Snx7|NM_029655	-0.129739	-0.92111	1.032
Mfsd7c|NM_145447	-0.219402	-0.919235	0.626
Tmem176a|NM_001098271	0.190094	-0.917307	0.354
Prkd2|NM_178900	-0.0806338	-0.917166	0.667
Jun|NM_010591	-0.47193	-0.916573	1.366
Zfpm2|NM_011766	0.00598397	-0.915068	0.932
Prnp|NM_011170	0.0710373	-0.914345	0.884
Camkk2|NM_145358	-0.452833	-0.914264	1.093
Dusp10|NM_022019	0.323093	-0.913634	2.221
Sp140|NM_001013817	0	-0.913356	1.963
Cyp26a1|NM_007811	0.0922645	-0.912526	0.729
Cd79b|NM_008339	-0.190333	-0.912034	0.243
Bcorl1|NM_178782	-0.251896	-0.910969	0.351
Syt1|NM_009306	-0.110932	-0.910274	0.315
Igfbp4|NM_010517	-0.178641	-0.90981	1.039
App|NM_007471	0.282113	-0.907022	0.54
Il10rb|NM_008349	-0.353301	-0.906429	0.546
Wnk1|NM_198703	-0.23647	-0.906152	2.344
Tjp1|NM_009386	-0.169303	-0.905428	1.512
BC029214|NM_153557	0.154781	-0.90528	0.813
Cd9|NM_007657	0.0227224	-0.905229	0.52
Fam129b|NM_146119	0.0946714	-0.904986	1.467
Tgfb3|NM_009368	-0.0602713	-0.90498	0.208
Nudt4|NM_027722	-0.132364	-0.904717	1.39
Ccl20|NM_016960	0	-0.904521	0.728
En1|NM_010133	-0.0189961	-0.904376	0.85
Kdelr3|NM_134090	-0.170639	-0.903331	1.101
Chst14|NM_028117	-0.226671	-0.90291	1.014
Pdzd2|NM_001081064	0.0261401	-0.902126	0
Rap2c|NM_172413	-0.248395	-0.900671	0.292
Car2|NM_009801	-0.142244	-0.898184	1.712
Dll3|NM_007866	-0.294392	-0.897797	0.309
Arap2|NM_178407	-0.272652	-0.897688	2.252
Slc16a2|NM_009197	0.0616202	-0.89652	0.607
Pkia|NM_008862	-0.12053	-0.894699	0.877
Kctd6|NM_027782	-0.245669	-0.893717	1.616
Fkbp7|NM_010222	-0.377448	-0.890659	0.303
Palld|NM_001081390	0.0160192	-0.887539	0
Tns4|NM_172564	0.101578	-0.885658	0.121
Dlx3|NM_010055	-0.456768	-0.883732	0.473
Sh3rf1|NM_021506	-0.371471	-0.879741	1.118
Hspa1b|NM_010478	-0.170328	-0.879014	1.03
Spsb1|NM_029035	0.0906359	-0.878034	0.841
Mpzl3|NM_001093749	0.13553	-0.877876	0.903
Lamb2|NM_008483	-0.122857	-0.877732	0.768
Wnt2b|NM_009520	0.0894182	-0.87749	0.5
Gng12|NM_001177558	-0.163609	-0.876451	0.605
Steap2|NM_028734	-0.454109	-0.874749	0.681
Rassf1|NM_019713	0.169662	-0.874426	2.434
Mat1a|NM_133653	-0.0363845	-0.874049	0.182
Cdon|NM_021339	-0.108215	-0.87403	0.023
Rgs14|NM_016758	0.22304	-0.87401	0.243
Cd55|NM_010016	-0.218779	-0.873782	2.127
Slc2a1|NM_011400	-0.276087	-0.87325	2.032
Tgfbr2|NM_029575	-0.00724369	-0.872559	0.795
Kank1|NM_181404	-0.122036	-0.872514	1.39
Ctr9|NM_009431	-0.165206	-0.87215	0.722
H2-D1|NM_010380	0.0405969	-0.871667	0.795
Sertad4|NM_198247	0.0529681	-0.870764	1.529
Oxct2b|NM_181859	-0.314825	-0.869214	0.463
Sowahb|NM_175270	-0.193643	-0.86461	1.221
4930506M07Rik|NM_175172	0.397457	-0.864382	0.306
Prr5|NM_146061	0.0659211	-0.863444	0.794
Ptar1|NM_028208	0.00778524	-0.863364	1.103
Pofut2|NM_030262	-0.470509	-0.862186	2.124
Farp1|NM_134082	-0.361379	-0.862038	0.766
Ripk2|NM_138952	0.0788448	-0.85985	2.011
Hnrnpul2|NM_001081196	-0.933432	-0.859642	1.865
Ikbip|NM_027078	-0.106006	-0.859542	1.733
Zbed6|NM_001166552	-0.0917088	-0.85951	1.906
Cdk14|NM_011074	-0.0504713	-0.858127	0.834
Sema3c|NM_013657	-0.0833171	-0.857221	1.148
Lphn2|NM_001081298	-0.805312	-0.856324	0.237
Il13ra1|NM_133990	0.100515	-0.855967	0.364
Lrrfip1|NM_008515	-0.460778	-0.855711	1.776
Igsf9|NM_033608	-0.219176	-0.854691	2.218
Igf1r|NM_010513	-0.00064085	-0.854487	1.557
Tdrd7|NM_146142	0.100574	-0.85409	0.322
Cxx1a|NM_024170	0.0546135	-0.852598	0.789
Cyld|NM_001128169	-0.0997021	-0.851579	1.201
Hoxa1|NM_010449	-0.00484357	-0.851016	1.257
Dusp22|NM_001037955	-0.571845	-0.846923	0.848
Zdhhc9|NM_172465	0.00664128	-0.845762	0.363
Satb2|NM_139146	0.190121	-0.844833	1.253
Crlf2|NM_016715	0.628627	-0.843592	0.596
Tfap2e|NM_198960	-0.0154724	-0.84353	0.433
Prkar1b|NM_001253890	0.068964	-0.842265	0.209
Galnt3|NM_015736	-0.13735	-0.841801	1.113
Dusp1|NM_013642	0.0773975	-0.841654	1.422
Usp27x|NM_019461	-0.168174	-0.841625	1.007
Afap1l2|NM_146102	-0.0576077	-0.841622	0.663
Nedd4l|NM_031881	-0.188461	-0.841519	0.243
Cdkl1|NM_183294	0.049732	-0.841026	0.243
Mogat2|NM_177448	-0.170909	-0.840799	0.369
Cldn7|NM_016887	0.281345	-0.840473	1.496
Cdc42ep5|NM_021454	-0.0313498	-0.840454	1.76
Cda|NM_028176	-0.302517	-0.839548	0.537
Ehd1|NM_010119	-0.128719	-0.83863	1.972
Slc5a6|NM_001177622	-0.134013	-0.835786	1.306
Coro2a|NM_001164804	-0.558993	-0.835782	0.735
Grb10|NM_010345	-1.43947	-0.835236	1.129
Vstm2b|NM_021387	-0.0937536	-0.834123	0.493
Map3k15|NM_001163085	-0.699122	-0.834074	0.728
Txnip|NM_023719	0.302985	-0.833827	2.279
Rab13|NM_026677	0.145564	-0.833148	0.964
Usp32|NM_001029934	-0.716022	-0.8317	1.467
Nat6|NM_019750	-0.17356	-0.83111	0.351
Adam9|NM_007404	0.0144721	-0.830921	0.983
Rhobtb3|NM_028493	-0.519239	-0.830272	1.637
Fzd6|NM_008056	-0.379124	-0.830158	1.635
Tmem45a|NM_019631	-0.559114	-0.829876	0.603
Gdf6|NM_013526	0.0443961	-0.829172	0.443
Mast2|NM_008641	-0.23955	-0.827991	1.01
Fhl2|NM_010212	-0.0758826	-0.826948	1.659
Gap43|NM_008083	-0.794489	-0.826549	0.402
Dysf|NM_021469	0.0905746	-0.825439	0.182
Tead4|NM_011567	0.320128	-0.825072	3.353
Slc12a4|NM_009195	-0.280543	-0.824788	1.336
Polg|NM_017462	-0.20406	-0.823744	1.688
Sned1|NM_172463	-0.347839	-0.823714	1.888
Tmem63a|NM_144794	-0.0965488	-0.823555	1.477
Mal|NM_010762	-0.0686206	-0.8232	0.574
Birc3|NM_007464	-0.18696	-0.821417	0.699
Rnf19a|NM_013923	-0.120563	-0.820605	1.26
Cast|NM_009817	0.0618895	-0.819422	0.734
Slamf9|NM_029612	-0.243916	-0.818629	0.364
Sbsn|NM_172205	-0.11726	-0.817611	0.303
Cdc42bpg|NM_001033342	0.200883	-0.81752	1.289
Pik3cb|NM_029094	-0.150552	-0.817235	1.606
Gbp7|NM_145545	-0.0503885	-0.817003	0.806
Adamts1|NM_009621	-0.0850781	-0.815691	0.596
Nrk|NM_013724	0.210122	-0.815623	0.072
Lmf2|NM_178919	0.0867026	-0.815136	1.498
Fgfr1|NM_010206	-0.242208	-0.81476	0.987
Aim1|NM_172393	0.00125436	-0.813153	0.192
Tmem106a|NM_144830	0.3393	-0.813021	0.233
1700009P17Rik|NM_001081275	-0.155564	-0.812266	0.243
Psmb8|NM_010724	0.323996	-0.811008	0.708
Add1|NM_013457	-0.600051	-0.81089	1.547
Lpcat4|NM_207206	-0.00572094	-0.81082	1.128
Cdkn2b|NM_007670	-0.176462	-0.809189	0.982
Fam89a|NM_001081120	-0.073583	-0.808314	0.608
Fam132b|NM_173395	0.051992	-0.8082	1.226
Reep1|NM_178608	-0.215002	-0.808183	0.485
Fmr1nb|NM_174993	-0.105106	-0.806919	0.006
Marcks|NM_008538	-0.64527	-0.806679	0.546
Sbno2|NM_183426	0.158907	-0.806243	0.728
Myof|NM_001099634	0.108924	-0.805587	0.364
Tead1|NM_001166585	-0.19854	-0.805563	0.061
Tlr2|NM_011905	-0.165007	-0.804684	0.436
Lgals3|NM_010705	-0.0278159	-0.80444	0.546
Irf2|NM_008391	-0.0943705	-0.803786	0.433
Tm6sf1|NM_145375	-0.652952	-0.802988	0.914
Nudt18|NM_153136	-0.096561	-0.802895	1.335
Spats2l|NM_001164566	0.18182	-0.802445	0.306
Adra1d|NM_013460	0	-0.801789	0.529
Klf6|NM_011803	0.235379	-0.801052	2.035
S1pr2|NM_010333	-0.229715	-0.800955	1.225
Fam65a|NM_001081241	0.0328106	-0.800816	0.667
Irf6|NM_016851	0.206504	-0.799849	1.274
Stard13|NM_146258	-0.200049	-0.799806	0.667
Tram2|NM_177409	0.0799138	-0.799606	1.436
Pdlim3|NM_016798	0.0159521	-0.798551	1.048
Wbp5|NM_011712	-0.259528	-0.798531	0.326
Cnn3|NM_028044	-0.312967	-0.798497	1.997
Inppl1|NM_010567	-0.167954	-0.796939	1.343
Sema3f|NM_011349	0.159481	-0.795556	0.887
Man1a|NM_008548	-0.164548	-0.795301	0.121
Egln1|NM_053207	-0.37013	-0.794651	0.971
Mtmr4|NM_133215	0.116281	-0.792993	1.703
Mmp23|NM_011985	-0.563698	-0.792069	0.667
B3galnt1|NM_020026	0.114471	-0.792	0.544
Itgb1|NM_010578	-0.170311	-0.791961	2.103
Pspn|NM_008954	0.0464931	-0.791531	0.182
Arhgef25|NM_028027	0.0346594	-0.790672	1.297
Xkr4|NM_001011874	-0.0175209	-0.789998	2.965
D8Ertd82e|NM_172911	-0.184632	-0.789354	1.479
Nes|NM_016701	0.280412	-0.788872	1.182
Epha1|NM_023580	0.127162	-0.788807	1.168
Plekhb2|NM_175421	0.346459	-0.788183	0.121
Ppl|NM_008909	-0.0692474	-0.788145	1.241
Efr3a|NM_133766	-0.00309026	-0.787266	0.607
Dgka|NM_016811	-0.159659	-0.787079	0.869
Tmem45b|NM_144936	-0.0188388	-0.786972	0.512
Abhd6|NM_025341	0.163316	-0.786366	0.949
Epn3|NM_027984	0.0500196	-0.785176	1.463
Hspa1a|NM_010479	-0.526346	-0.784177	1.153
Rab11fip1|NM_029423	-0.148781	-0.784093	1.605
Oasl2|NM_011854	0.0229901	-0.78362	0.539
Ppp2r5b|NM_198168	0.120131	-0.782103	1.074
Lrrc8a|NM_177725	-0.462857	-0.78181	2.385
Mapk8ip3|NM_013931	0.264236	-0.781674	1.384
Rhod|NM_007485	-0.164345	-0.781181	2.04
Arhgap6|NM_178754	-0.0310277	-0.78049	0.546
Lrpap1|NM_013587	-0.0557541	-0.780299	0.585
Rell1|NM_145923	0.24609	-0.779818	1.37
Dstn|NM_019771	-0.207391	-0.778714	3.294
Tap1|NM_013683	0.127851	-0.774973	1.032
Dag1|NM_010017	-0.184871	-0.774846	2.207
Gdpd5|NM_201352	0.0793262	-0.774519	1.026
Hyal2|NM_010489	0.020889	-0.77393	1.505
Mex3b|NM_175366	0.00598026	-0.77377	0.389
Smad3|NM_016769	-0.381519	-0.773514	1.163
Dzip1l|NM_028258	-0.16577	-0.772745	1.396
Nfatc1|NM_198429	0.0383711	-0.770327	0.45
Nab1|NM_008667	-0.139709	-0.770243	0.982
Gm1045|NM_001177577	0.108929	-0.77016	0.243
Htra1|NM_019564	-0.5393	-0.769382	0.721
Mall|NM_145532	0.198717	-0.769232	0.647
Ocln|NM_008756	-0.482505	-0.769107	0.485
Rap2b|NM_028712	-0.249444	-0.768582	1.747
Pcdh18|NM_130448	0.0150288	-0.768233	1.063
Erc1|NM_178085	-0.0898445	-0.768115	2.267
Dimt1|NM_025447	-0.478513	-0.767958	1.189
Myo1e|NM_181072	-0.014482	-0.767859	0.976
Mmp25|NM_001033339	-0.119888	-0.766706	1.82
Actb|NM_007393	-0.228693	-0.766706	2.221
Cish|NM_009895	-0.19095	-0.765441	0.445
Phospho1|NM_153104	-0.384817	-0.765306	1.335
Aebp1|NM_009636	-0.0910921	-0.764928	0.477
Mafa|NM_194350	-0.0709061	-0.764719	0.699
Wipf3|NM_001167861	-0.474984	-0.764491	0.061
Htra2|NM_019752	0.0734078	-0.764229	1.577
Iqsec2|NM_001005475	-0.252832	-0.764208	0.121
Pik3c2a|NM_011083	-0.289367	-0.76404	1.742
Rtkn|NM_133641	-0.285966	-0.763899	0.289
Lpgat1|NM_001134829	-0.334068	-0.763112	1.152
Sat1|NM_009121	0.204926	-0.762457	1.169
Atn1|NM_007881	-0.481473	-0.762294	1.037
Dapk3|NM_007828	-0.20939	-0.761748	0.174
Grik5|NM_008168	-0.183861	-0.761555	0.429
Plod1|NM_011122	-0.234652	-0.761269	1.092
Rpl23a|NM_207523	0.478496	-0.760968	1.847
Dennd2a|NM_172477	-0.0700079	-0.760794	1.578
Tdrd5|NM_001134741	-0.110761	-0.759914	0.931
Klhl18|NM_177771	-0.0178116	-0.759879	0.786
Papd7|NM_198600	-0.389755	-0.759613	0.544
Rhox13|NM_001185002	-0.300191	-0.759378	0.055
Gpr63|NM_030733	-0.0908571	-0.758686	0
Alox5ap|NM_009663	-0.566297	-0.758551	0.307
Heg1|NM_175256	-0.0537857	-0.757627	0.542
Bnip2|NM_001008238	-0.339495	-0.757132	0.243
Arhgef17|NM_001081116	-0.115295	-0.756411	1.774
Tenc1|NM_153533	-0.304141	-0.756179	1.107
Antxr2|NM_133738	0	-0.756104	1.455
Tmem184a|NM_001161548	0.349646	-0.755228	0.743
Arhgap1|NM_146124	0.189009	-0.754598	0
Slc25a14|NM_001166450	0.181425	-0.753457	0.94
Etfdh|NM_025794	-0.109117	-0.753112	1.738
Plxnb2|NM_138749	0.0275587	-0.7529	1.502
Map4k5|NM_201519	-0.123832	-0.752886	1.759
Ecm1|NM_007899	-0.273346	-0.752793	0.264
Trex1|NM_011637	-0.353471	-0.751952	0.971
Cav2|NM_016900	-0.0467869	-0.750758	0.728
Myd88|NM_010851	0.0364966	-0.74974	0.303
Plekhm2|NM_001033150	-0.164838	-0.749517	0.36
Prss8|NM_133351	0.0651045	-0.748994	1.266
Cldn3|NM_009902	-0.0794809	-0.748411	0.944
Tnf|NM_013693	0	-0.748035	0.243
Med12l|NM_177855	-0.114651	-0.748012	1.341
1810055G02Rik|NM_028077	-0.33652	-0.747463	1.274
Tbx3|NM_198052	0.257421	-0.747051	1.91
Arhgef16|NM_001112744	-0.107787	-0.74671	2.143
Spint1|NM_016907	0.340723	-0.745443	2.377
Apln|NM_013912	-0.00319187	-0.745054	0.333
Kifc3|NM_010631	-0.357246	-0.74421	0.617
H2-Q8|NM_023124	0.0233301	-0.741408	0.962
Esrp2|NM_176838	0.190531	-0.741339	1.572
Eomes|NM_010136	-0.0112686	-0.741016	0.966
Ptx3|NM_008987	-0.0348128	-0.740248	0.061
Cacna1a|NM_007578	-0.0434371	-0.739676	0.785
Crb3|NM_177638	0.197417	-0.739441	0.891
Rnase4|NM_201239	-0.710051	-0.739162	0.104
Vasp|NM_009499	-0.415282	-0.739014	1.834
Samd14|NM_146025	-0.210104	-0.738146	0.402
Des|NM_010043	-0.342696	-0.738065	0.389
Lrrc32|NM_001113379	0.0730663	-0.737506	0.081
Elmo3|NM_172760	0.165564	-0.737113	1.855
Siah2|NM_009174	-0.0125268	-0.737025	0.53
Grip1|NM_130891	-0.14118	-0.736952	0.243
Dlk2|NM_207666	0.0567796	-0.735897	0.716
Stk25|NM_021537	-0.00460993	-0.735754	1.766
Pggt1b|NM_172627	-0.0951043	-0.735443	0.85
Tulp1|NM_021478	-0.33095	-0.734839	0.48
Tbc1d2b|NM_194334	-0.057559	-0.734727	0.697
8430427H17Rik|NM_001134300	-0.112222	-0.733783	0.45
Jund|NM_010592	-0.17176	-0.733668	0.127
Slc9a3r2|NM_023055	0.0466738	-0.732263	0.542
Abhd5|NM_026179	-0.384567	-0.730858	2.176
Mark4|NM_172279	0.124716	-0.730661	0.981
Tnfrsf10b|NM_020275	-0.0856683	-0.730132	0.546
Adrb3|NM_013462	-0.00742131	-0.729646	0.187
Ppapdc1b|NM_028000	-0.0168624	-0.729303	0.999
Cln6|NM_001033175	-0.0809255	-0.728089	0.799
Frk|NM_010237	-0.0101737	-0.72697	0.393
Rgmb|NM_178615	-0.216476	-0.726174	1.758
Vegfc|NM_009506	-0.650504	-0.72571	0.597
Arsa|NM_009713	0.173023	-0.725327	0.594
Stbd1|NM_175096	-0.0177105	-0.725082	0.467
Creb3l4|NM_030080	0.165533	-0.724995	0.728
Gramd1a|NM_027898	0.0856666	-0.72471	1.214
Sync|NM_023485	0.101618	-0.724661	0.356
Npnt|NM_033525	-0.144331	-0.724588	0.893
Parp4|NM_001145978	-0.0991798	-0.724553	0.566
Igfbp2|NM_008342	-0.00630367	-0.724476	2.626
St3gal5|NM_011375	0.099401	-0.724323	0.789
Sdr39u1|NM_001082975	-0.188026	-0.722225	0.93
Elf4|NM_019680	0.157876	-0.721396	0.513
Copz2|NM_019877	0.240326	-0.720081	0.204
Slc18a3|NM_021712	-0.0534006	-0.719689	0.934
Gng10|NM_025277	-0.212222	-0.719044	0.772
Reep5|NM_007874	0.225183	-0.718229	0.987
Mmp14|NM_008608	-0.444508	-0.718212	1.032
Ccdc80|NM_026439	-0.0174501	-0.717092	0.018
Ppp1r12a|NM_027892	-0.463997	-0.714798	1.241
Ctnna1|NM_009818	-0.280964	-0.714792	2.654
Col4a3bp|NM_023420	-0.260428	-0.7146	1.299
Fam110c|NM_027828	0.124613	-0.714519	0.795
Dvl1|NM_010091	-0.0272738	-0.713774	1.534
H2-Q2|NM_010392	0.672353	-0.713403	0.386
Gtpbp2|NM_019581	-0.00940704	-0.712955	1.763
Htr1d|NM_008309	0.0159988	-0.712603	0.134
Padi2|NM_008812	0.442064	-0.712596	0.668
Ethe1|NM_023154	-0.199404	-0.712434	0.298
Prtg|NM_175485	-0.230833	-0.711655	1.703
Susd4|NM_144796	-0.666724	-0.711168	1.234
Micall1|NM_177461	-0.00247029	-0.711096	0.619
Myzap|NM_001033208	0.192318	-0.710986	1.092
Btn2a2|NM_175938	0.110745	-0.710766	0.426
Ms4a4d|NM_025658	-1.03134	-0.709967	0.546
Tmem59|NM_029565	0.189292	-0.709862	1.729
Tnni2|NM_009405	-0.241774	-0.709495	0.393
Wsb1|NM_019653	0.00865413	-0.708316	0.303
Atp2b4|NM_213616	0.0316685	-0.708049	0.182
Zc3h7a|NM_145931	-0.0899347	-0.708045	1.352
Fermt2|NM_146054	-0.197394	-0.707389	1.35
Fam13c|NM_024244	-1.13023	-0.706825	0.886
Lor|NM_008508	-0.11031	-0.706706	0.469
Mbnl3|NM_134163	-0.0303569	-0.706021	0.702
Fbxo6|NM_001163707	0.123633	-0.705863	0.57
Slc38a5|NM_172479	-0.309792	-0.705809	0.182
Nipa1|NM_153578	-0.100839	-0.705539	0.878
Als2cl|NM_001146060	-0.312364	-0.705082	1.052
Myh10|NM_175260	-0.121389	-0.70455	2.054
Mapt|NM_010838	-0.114141	-0.703345	1.421
Jak1|NM_146145	-0.597586	-0.702106	0.835
Uhrf2|NM_144873	-0.235017	-0.701572	2.047
Lysmd3|NM_030257	-0.416591	-0.701389	2.223
Gjb5|NM_010291	0.453006	-0.701304	0.303
Bag2|NM_145392	-0.435573	-0.700875	1.564
Inf2|NM_198411	-0.271055	-0.700666	1.634
Ano10|NM_133979	-0.141855	-0.700613	1.272
Oaf|NM_178644	-0.397874	-0.700159	1.303
Socs1|NM_009896	-0.0241433	-0.69996	2.15
Pkdcc|NM_134117	0.0105385	-0.699773	0.813
AK129341|NM_001045524	-0.0664789	-0.699372	1.021
1500009L16Rik|NM_001145198	-0.089337	-0.699307	0.903
Pgam2|NM_018870	0.531439	-0.699178	0.27
Slc44a1|NM_133891	-0.14867	-0.698936	1.842
Haghl|NM_026897	0.243125	-0.696635	1.254
Rbms2|NM_001039080	0.023559	-0.696438	0.584
Cuedc1|NM_001172099	-0.277882	-0.695742	0.608
Sdc1|NM_011519	-0.0525805	-0.695405	1.208
Sh3bgr|NM_015825	-0.272203	-0.694694	0.141
Afap1l1|NM_178928	-0.0152439	-0.694502	0.836
Adcy2|NM_153534	-0.00760394	-0.693618	0.971
Fam174a|NM_026321	0.163736	-0.693319	1.609
Tpbg|NM_001164792	0.0412514	-0.693145	1.072
Pdpn|NM_010329	-0.456615	-0.692791	0.596
Rab11fip5|NM_177466	-0.168206	-0.69278	0.352
Adipor2|NM_197985	-0.779235	-0.692761	0.253
Cldn1|NM_016674	-0.0392841	-0.692493	0.485
Hyi|NM_026601	0.341113	-0.692259	1.215
Gata2|NM_008090	0.533782	-0.692094	0.333
Scn3b|NM_178227	-0.173166	-0.690965	1.057
Tbc1d8|NM_018775	0.204969	-0.690797	1.173
Ptk7|NM_175168	0.0843995	-0.689776	1.03
Oplah|NM_153122	-0.151376	-0.689615	0.563
Cdh11|NM_009866	-0.0184136	-0.689373	0.356
Gal|NM_010253	-0.0820893	-0.688836	0.364
Marveld3|NM_212447	-0.323329	-0.68732	0.576
Vim|NM_011701	0.332351	-0.686869	0.743
Adc|NM_172875	0.166494	-0.686642	0.425
Efs|NM_010112	-0.618563	-0.686533	0.913
Tasp1|NM_001159641	0.0877604	-0.686508	1.633
Lrrn4|NM_177303	-0.347667	-0.686457	2.789
Pxdn|NM_181395	-0.501139	-0.686405	1.119
Cd151|NM_001111050	0.157184	-0.686332	1.139
Nfil3|NM_017373	-0.179241	-0.685723	0.667
Agpat3|NM_053014	-0.490407	-0.685408	0.402
Irf1|NM_001159396	0.276472	-0.68535	1.318
Cblc|NM_023224	0.203209	-0.685236	0.922
Ktn1|NM_008477	-0.483915	-0.685017	0.257
1700008O03Rik|NM_027049	-0.18012	-0.684829	6.353
Coq10b|NM_026424	0.140167	-0.684446	2.58
Hmox2|NM_010443	-0.652568	-0.684375	0.121
Tspan33|NM_146173	0.00773086	-0.683624	0.571
Defa6|NM_007852	0	-0.683304	0.121
Slc7a6|NM_178798	-0.213566	-0.683282	0.546
Zfp568|NM_001167873	-0.292	-0.682211	2.295
Ext1|NM_010162	-0.170161	-0.68219	3.267
Kctd15|NM_146188	0.0813155	-0.68103	0.061
Evx1|NM_007966	0.0929901	-0.680187	1.102
Med11|NM_025397	-0.539876	-0.67978	2.76
Gm4907|NM_001034864	-0.46961	-0.678343	0.121
Inadl|NM_007704	-0.237205	-0.678294	0.061
Man1c1|NM_207237	-0.00916949	-0.677815	0.858
Eln|NM_007925	-0.0161687	-0.677713	0.425
Gli3|NM_008130	-0.0527903	-0.677127	1.246
Cdc26|NM_139291	-0.954814	-0.676368	0.878
Rnf141|NM_025999	-0.29778	-0.676172	1.032
Ppp1r14c|NM_133485	-0.282088	-0.676142	0.303
Serpinb6b|NM_011454	0.257774	-0.676105	0
Ece1|NM_199307	-0.269669	-0.675658	1.372
Ankrd13c|NM_001013806	-0.150564	-0.674972	1.471
Cul7|NM_025611	-0.321842	-0.674635	1.862
Nrip3|NM_020610	0.14123	-0.674152	0.449
Dcp2|NM_027490	-0.813944	-0.673627	1.125
Coq9|NM_026452	-0.734332	-0.67337	1.188
Cacng7|NM_133189	-0.393745	-0.673233	0.863
Adap1|NM_172723	-0.0209283	-0.672984	0.572
Lhfpl2|NM_172589	0.0720652	-0.672668	1.092
Pkp4|NM_175464	-0.150773	-0.671703	0.828
Tcf20|NM_013836	-0.686734	-0.671554	0.561
Hspb8|NM_030704	0.00323538	-0.67074	0.721
St14|NM_011176	0.484167	-0.670051	0.674
Fignl2|NM_001214911	-0.0913008	-0.668178	0.481
Fundc1|NM_028058	-0.722173	-0.668019	0.432
Mmd|NM_026178	0.00992566	-0.667816	0.644
Slc4a4|NM_018760	-0.0415167	-0.667716	0.707
Gnas|NM_201616	-0.687975	-0.666834	1.001
Phf1|NM_009343	-0.00936331	-0.665792	1.443
Ly6a|NM_010738	1.2736	-0.665574	0.182
Slco4a1|NM_148933	0.0752608	-0.665491	0.121
Mki67|NM_001081117	-0.123518	-0.665216	0.637
Slc30a3|NM_011773	-0.0394528	-0.664832	0.589
Cttn|NM_007803	0.0680768	-0.664486	0.745
Cdx2|NM_007673	-0.0524537	-0.663164	0.931
Relt|NM_177073	0.390904	-0.663141	1.76
Lrrc16a|NM_026825	-0.123753	-0.662826	1.395
Schip1|NM_013928	0.217904	-0.662152	0.789
Sgsm2|NM_197943	0.0168569	-0.660552	1.237
Nuak2|NM_028778	0.0283769	-0.660429	2.178
Gng2|NM_010315	-0.357329	-0.660035	0.928
Mpzl1|NM_001083897	0.0051014	-0.659541	2.121
Tirap|NM_001177845	0.0230917	-0.659451	0.972
Slc4a2|NM_001253892	-0.0612921	-0.658872	0.411
Susd2|NM_027890	-0.335699	-0.657852	0.352
Pstpip1|NM_011193	0.486295	-0.657784	0.758
Hpn|NM_008281	-0.00584822	-0.657069	0.888
Slc35e4|NM_153142	-0.165187	-0.656977	0.962
Tsc22d1|NM_009366	-0.27317	-0.656775	1.443
Apba2|NM_007461	-0.113358	-0.655158	0.373
Shisa5|NM_026381	0.292918	-0.654316	0.243
Slc39a8|NM_001135150	-0.00205513	-0.654275	0.707
Bai2|NM_173071	-0.301853	-0.654107	0.474
Gulp1|NM_028450	-0.323878	-0.653607	1.062
Stat3|NM_213660	0.281304	-0.653545	1.737
L1cam|NM_008478	-0.337623	-0.653409	0.607
Alg8|NM_199035	0.062767	-0.653364	1.462
Fabp3|NM_010174	-0.222631	-0.653094	1.28
Lif|NM_001039537	0.314181	-0.652915	2.34
Ptpra|NM_008980	-0.247098	-0.652812	1.336
Suox|NM_173733	0.206053	-0.652621	0.911
Lpar6|NM_175116	-0.509546	-0.652469	1.172
Ccl27a|NM_001164044	0.489657	-0.651955	0.717
Fgfr3|NM_001163217	-0.245058	-0.651722	0.446
Tmem184b|NM_172608	-0.051857	-0.651538	1.228
Twist2|NM_007855	-0.0536961	-0.651527	0.977
Ralgds|NM_001145836	-0.0231324	-0.650983	0.519
Tmem150a|NM_144916	-0.256506	-0.650655	0.727
Kcne1l|NM_021487	0.0113176	-0.649852	0.209
Kcnk6|NM_001033525	-0.180993	-0.649542	0.728
Itga8|NM_001001309	-0.0713278	-0.649435	0.515
Pdgfa|NM_008808	0.475587	-0.649122	1.029
Slc25a43|NM_001085497	-0.45776	-0.64862	0.121
Spa17|NM_011449	0.0917423	-0.647893	1.202
Tesk2|NM_146151	-0.0316337	-0.645834	0.87
Dap|NM_146057	-0.435057	-0.645635	1.396
Kti12|NM_029571	-0.87972	-0.645478	0.904
Tuft1|NM_011656	0.094255	-0.644804	1.735
Fmnl2|NM_172409	-0.420268	-0.644685	0.34
Ppfibp1|NM_026221	0.0531612	-0.644492	2.476
Taf7l|NM_028958	-0.0123873	-0.643767	0.12
Klhl32|NM_001163020	0.144036	-0.643554	0.625
Ctdsp1|NM_153088	-0.0956625	-0.642673	4.388
Adamtsl5|NM_001113548	-0.323733	-0.64248	1.283
B3gnt5|NM_054052	-0.175018	-0.642266	0.91
Aldh5a1|NM_172532	-0.13468	-0.64216	0.485
Ebf4|NM_001110513	-0.0119485	-0.642097	0.577
Pxk|NM_178279	-0.0119888	-0.641779	1.838
Klk8|NM_008940	0.0824035	-0.641707	0.641
Nfatc4|NM_023699	-0.231262	-0.63987	0.475
Caskin2|NM_080643	-0.0701703	-0.639584	1.27
Acsl3|NM_028817	-0.228227	-0.637784	4.019
Tubb2a|NM_009450	-0.141568	-0.63742	0.91
Cmtm8|NM_027294	-0.127613	-0.637308	1.079
Syvn1|NM_001164709	0.0875558	-0.637043	0.482
Cyfip2|NM_001252459	0.187975	-0.636641	0.313
Epb4.1l5|NM_145506	0.353686	-0.636503	2.449
Unc45b|NM_178680	-0.183873	-0.636405	0.121
Nkx1-2|NM_009123	-0.00903293	-0.636301	0.398
Kalrn|NM_177357	-0.0059731	-0.636142	0
Cisd3|NM_001085500	-0.0772801	-0.635892	0.971
Fbxo36|NM_025386	0.189525	-0.635742	2.772
Tes|NM_207176	0.0248738	-0.635595	0.441
Leprel1|NM_173379	-0.0861882	-0.634772	1.048
Pde10a|NM_011866	-0.0389089	-0.633991	0.701
Tnfrsf1a|NM_011609	0.0266576	-0.633968	0.59
Mink1|NM_176893	-0.176927	-0.633628	0.589
Zfp36l3|NM_001009549	-0.0401435	-0.632571	0.364
Esyt1|NM_011843	-0.127828	-0.632141	1.04
Stx2|NM_007941	-0.0751913	-0.632088	1.002
Glrx5|NM_028419	-1.11792	-0.631832	0.66
Serping1|NM_009776	-0.0844906	-0.631187	0.293
Glipr1|NM_028608	-0.0784241	-0.630888	0.271
Ubtd2|NM_173784	-0.213513	-0.63049	0.962
Mllt4|NM_010806	-0.0302747	-0.630073	1.488
Ptp4a2|NM_001164745	-0.574896	-0.629375	1.451
Iffo2|NM_001205173	-0.109171	-0.628715	1.379
Itprip|NM_001001738	0.0755972	-0.628637	0.699
Cobll1|NM_177025	-0.166702	-0.628562	0.909
Scrib|NM_134089	-0.48393	-0.627247	2.34
Pacsin2|NM_001159509	0.0793686	-0.626703	1.527
Hspb11|NM_028394	0.208398	-0.625395	0.664
Gas6|NM_019521	-0.143562	-0.624709	0.425
Nek6|NM_001159631	-0.0436281	-0.623887	1.033
Ptpn21|NM_001146199	-0.328692	-0.623804	2.186
Prmt2|NM_133182	-0.396986	-0.623606	0.546
Impdh1|NM_011829	-0.175578	-0.623228	0.775
Wdr1|NM_011715	-0.0660691	-0.622742	1.587
Lzts1|NM_199364	-0.0979661	-0.622645	0.243
Tuba1a|NM_011653	-0.0604646	-0.622258	1.249
Scml2|NM_133194	0.0221322	-0.622218	0.485
Capg|NM_001042534	0.390369	-0.622078	0.061
Pdlim5|NM_019809	0.111419	-0.621842	1.45
Tmem9b|NM_020050	0.302444	-0.62167	0.485
Eppk1|NM_144848	-0.0208992	-0.621575	0.39
Ahr|NM_013464	0.0912115	-0.621317	1.346
Dst|NM_134448	-0.186723	-0.621015	1.46
Lmo4|NM_010723	-0.432129	-0.620984	1.065
Cc2d1a|NM_145970	-0.0815893	-0.620489	1.032
Alox12e|NM_145684	0.271609	-0.619792	0.442
Osbpl8|NM_175489	-0.176558	-0.619396	1.153
Sult5a1|NM_020564	-0.628772	-0.618737	0.447
St3gal6|NM_018784	-0.223921	-0.618271	0.829
Ghdc|NM_031871	-0.111615	-0.617942	0.603
Cxadr|NM_009988	-0.0588371	-0.617432	1.03
Cxcl14|NM_019568	0.0282977	-0.617134	0.386
Spsb2|NM_013539	0.0326732	-0.616603	0.993
Myc|NM_010849	-0.246515	-0.616533	1.51
Hip1|NM_146001	-0.584418	-0.616145	0.53
Tcf19|NM_025674	0.395197	-0.616051	1.681
Nek9|NM_145138	-0.609553	-0.615974	1.396
Cd40|NM_170704	0.0638944	-0.615459	0.519
Tmbim6|NM_001171035	-0.487117	-0.61487	0.245
B2m|NM_009735	-0.261074	-0.613946	0.586
Gramd4|NM_001205353	-0.282244	-0.613558	0.84
Fkbp10|NM_010221	-0.645808	-0.613536	0.789
Cdkl5|NM_001024624	-0.00542355	-0.613152	0.96
Phlda2|NM_009434	-0.320901	-0.612343	1.248
Gpr153|NM_178406	-0.342688	-0.612005	1.169
Kctd10|NM_026145	0.0164537	-0.611706	1.158
Fxyd5|NM_008761	-0.0570222	-0.611591	0.303
Tmem40|NM_001168257	0.88856	-0.610871	1.674
Klhl26|NM_178771	0.0346989	-0.61085	1.417
Wnt5b|NM_009525	0.00888746	-0.609991	0.459
Rhoc|NM_007484	0.109883	-0.609085	1.282
Usp43|NM_173754	0.432485	-0.609061	1.767
Pde4a|NM_019798	0.0545782	-0.608708	0.025
Cpne2|NM_153507	-0.365388	-0.607871	0.683
Parp14|NM_001039530	-0.0934887	-0.607144	0.486
Cysltr1|NM_021476	-0.0230914	-0.606482	1.043
Kctd11|NM_153143	-0.321478	-0.606195	2.703
Mbnl2|NM_207515	-0.403031	-0.606034	0.485
Ntf5|NM_198190	-0.220774	-0.605637	0.998
Dlg4|NM_007864	0.0253607	-0.6053	0.42
Acap1|NM_153788	-0.0257333	-0.60522	0.217
Bmp2|NM_007553	0.0866072	-0.605124	0.425
Zfp800|NM_001081678	-0.0834576	-0.604262	1.03
Prkx|NM_016979	0.00521531	-0.60419	0.769
Fbxw9|NM_026791	0.264904	-0.604024	0.607
Smtn|NM_013870	-0.0237225	-0.603611	0.82
Aspg|NM_001081169	-0.453313	-0.603532	0.653
Plbd1|NM_025806	0.195241	-0.603235	0.68
Ppp1r9b|NM_172261	0.00653895	-0.602451	1.129
Mum1l1|NM_001164633	-0.386248	-0.602374	0.243
Trp53i11|NM_001025246	-0.604295	-0.601147	0.838
Ltbp4|NM_175641	-0.227419	-0.601103	0.91
Il24|NM_053095	0	-0.601022	0.152
Nrbp2|NM_144847	-0.136546	-0.600695	0.247
Cask|NM_009806	-0.419088	-0.600545	0.85
Ctnnd1|NM_007615	-0.037761	-0.600099	0.303
Plekha3|NM_031256	-0.285764	-0.599484	0.659
Mapk4|NM_172632	-0.306834	-0.598168	1.153
Otud7b|NM_001025614	-0.030557	-0.59798	1.33
Axin2|NM_015732	-0.233556	-0.597914	1.87
Zfp703|NM_001110508	0.0809123	-0.597305	0.683
Pcyt1b|NM_211138	-0.585778	-0.597181	0.902
Fbn1|NM_007993	-0.0764976	-0.597124	0.906
Tec|NM_001113464	0.272664	-0.596985	1.153
Tmsb15a|NM_030106	-0.964503	-0.596236	0.061
Slc43a3|NM_021398	-0.61948	-0.595941	0.436
Lmbrd2|NM_177178	0.123349	-0.595928	0.939
Ikzf4|NM_011772	0.128164	-0.595345	0.081
Chst7|NM_021715	-0.0921062	-0.595239	0.313
Galr2|NM_010254	-0.408286	-0.595142	0.72
Cdv3|NM_175833	-0.592551	-0.594771	1.751
Rac3|NM_133223	0.144218	-0.594235	1.182
Wdr54|NM_023790	0.088468	-0.593987	0.483
Psd|NM_028627	-0.00672186	-0.593867	0.426
Lmo7|NM_201529	-0.0398095	-0.593522	1.866
C1galt1c1|NM_021550	0.34851	-0.593245	0.661
Fyn|NM_008054	0.100283	-0.593164	1.007
Rps6ka4|NM_019924	-0.348448	-0.592771	0.675
Kif23|NM_024245	-0.152471	-0.59217	1.929
Mrpl53|NM_026744	-0.876619	-0.591655	0.98
C77080|NM_001033189	-0.110042	-0.591302	0.595
Rhob|NM_007483	0.461009	-0.590577	1.372
Dpysl5|NM_023047	-0.325823	-0.590233	0.485
Mcts1|NM_026902	0.118209	-0.589781	0.85
Ttc28|NM_024477	-0.0380444	-0.58961	1.464
Ptms|NM_026988	-0.296498	-0.589318	1.584
H2-Q4|NM_001143689	0.397625	-0.58924	0.637
Obsl1|NM_178884	-0.30103	-0.588917	2.698
Rusc2|NM_199057	0.087153	-0.588384	0.855
Apobec2|NM_009694	0.689335	-0.588291	0.243
Ifngr1|NM_010511	-0.192937	-0.588015	0.875
Tmem63b|NM_198167	-0.0942916	-0.587483	1.127
Stx1a|NM_016801	0.0951742	-0.587131	0.687
Rhbdl1|NM_144816	-0.469259	-0.587033	0.676
Ppp2r2c|NM_172994	-0.526792	-0.58613	0.693
Ube2z|NM_172300	-0.495231	-0.584817	2.165
Dgkk|NM_177914	-0.039636	-0.584796	0.243
Gyg|NM_013755	-0.260831	-0.584592	0.337
Gipc2|NM_016867	-0.0638044	-0.583838	0.844
Wdr72|NM_001033500	0	-0.583537	0.216
Syngr2|NM_009304	0.223395	-0.583459	1.055
Ly96|NM_016923	0.126438	-0.583398	0.513
Cflar|NM_207653	-0.177022	-0.583389	1.192
Sccpdh|NM_178653	0.182504	-0.58335	1.173
Itgav|NM_008402	-0.0348869	-0.583304	1.217
C1galt1|NM_052993	-0.116774	-0.583002	0.769
Rhbdf2|NM_172572	-0.0235156	-0.582778	0.121
Cyb5r3|NM_029787	0.0819857	-0.580739	1.954
Bcl6|NM_009744	0.36386	-0.580602	1.461
Zdhhc21|NM_026647	-0.215121	-0.5805	0.794
Tsga8|NM_021898	-0.0682659	-0.580454	0
Slc9a5|NM_001081332	-0.0533071	-0.58044	1.133
Rccd1|NM_173445	-0.248464	-0.579756	0.948
Cyp2b23|NM_001081148	-0.154562	-0.578717	0.234
Sgce|NM_011360	-0.134013	-0.577933	1.032
Limk2|NM_010718	0.383374	-0.577891	1.674
Plscr3|NM_023564	-0.00309154	-0.577693	1.295
Ankrd28|NM_001024604	-0.14808	-0.57645	2.737
Ovol2|NM_026924	0.195172	-0.574809	0.485
Sepn1|NM_029100	-0.272232	-0.574674	0.121
Slc25a25|NM_146118	0.164856	-0.573851	1.396
Plxna1|NM_008881	-0.17209	-0.573184	0.439
Col6a1|NM_009933	0.0147042	-0.573007	0.243
Zdbf2|NM_028673	-0.193551	-0.572978	2.446
Igfbp7|NM_008048	0.36171	-0.570883	1.06
Mbd2|NM_010773	-0.467851	-0.570874	2.284
Epb4.1l2|NM_013511	-0.0377399	-0.570758	0
Edem1|NM_138677	-0.118754	-0.570452	1.359
Plp2|NM_019755	0.186843	-0.569619	1.045
Prkcd|NM_011103	0.065111	-0.568863	0.904
Tgfbr3|NM_011578	-0.00881341	-0.568092	1.005
Wwc1|NM_170779	-0.0950765	-0.568018	1.565
Tmc4|NM_181820	0.519685	-0.567912	0.425
Rgl3|NM_023622	0.0374472	-0.567566	0.292
Rsu1|NM_009105	-0.15229	-0.567515	0.452
Lta|NM_010735	-0.0505071	-0.567475	0.635
Greb1l|NM_001083628	-0.0523403	-0.567337	0.494
Ids|NM_010498	-0.157472	-0.567106	0.789
Cpeb2|NM_175937	0.0288914	-0.566476	1.443
Bcl2l1|NM_009743	0.0486167	-0.566436	2.029
Dlg1|NM_001252436	-0.232315	-0.566185	0
Pitpnm1|NM_008851	-0.299897	-0.566174	0.321
Eml3|NM_144872	-0.158915	-0.565631	0.641
1810041L15Rik|NM_001163145	-0.11572	-0.56519	0.167
Pbx2|NM_017463	-0.0115057	-0.56498	0.745
Gdi1|NM_010273	0.0186651	-0.564766	1.153
Klf4|NM_010637	-0.375474	-0.564588	0.992
Paqr7|NM_027995	-0.0317576	-0.56454	1.441
Comt|NM_007744	0.0605517	-0.564096	0.728
St6galnac2|NM_009180	0.333826	-0.564057	1.034
Akt3|NM_011785	-0.339609	-0.563694	0.485
Trim54|NM_021447	0.308779	-0.563384	0.121
Abcb1a|NM_011076	-0.285759	-0.562931	0.477
Ccdc24|NM_001034876	0.140826	-0.562583	0.243
Rassf3|NM_138956	0.0714336	-0.562509	1.548
Prima1|NM_133364	-0.0902543	-0.562195	0.703
Osbpl10|NM_148958	0.245402	-0.562007	0.061
Dvl3|NM_007889	0.011088	-0.562	1.28
Cntfr|NM_016673	-0.950974	-0.561924	0.197
Pdgfrb|NM_008809	-0.314523	-0.561479	0.303
Arhgef40|NM_198249	-0.181913	-0.561445	0.827
Atl1|NM_178628	0.0560548	-0.561301	1.845
Numa1|NM_133947	0.0378567	-0.561292	1.312
Vsig10|NM_001033311	0.214548	-0.560298	0.703
Adra2a|NM_007417	-0.0245947	-0.56019	0.728
Traf3|NM_011632	-0.0205837	-0.558718	0.864
Rgs19|NM_026446	-0.273431	-0.558639	1.409
Klf5|NM_009769	0.14353	-0.558177	1.272
Jazf1|NM_173406	0.0416855	-0.558152	0.724
Asb8|NM_001170711	-0.271155	-0.55781	0.161
Ets2|NM_011809	0.0217685	-0.557718	0.887
Rpusd1|NM_028009	0.0609581	-0.5573	0.618
Rfng|NM_009053	0.285635	-0.556534	1.114
Arhgef26|NM_001081295	-0.0139726	-0.556469	1.243
Pknox2|NM_148950	-0.116641	-0.556323	0.996
Src|NM_009271	0.168973	-0.556189	0.85
Rnf39|NM_001099632	-0.0611754	-0.555978	0.402
Lat|NM_010689	-0.0266505	-0.555478	0.328
Tmem79|NM_024246	-0.0538964	-0.555053	1.926
Cd109|NM_153098	0.0309913	-0.554298	0.661
Hap1|NM_177981	-0.0327219	-0.553988	0.489
Sh2b3|NM_008507	-0.177645	-0.553869	1.891
Trp53i13|NM_001024920	0.0660313	-0.553824	0.643
Hs6st1|NM_015818	-0.068014	-0.553812	2.061
Prr18|NM_178774	-0.00556446	-0.55367	1.09
Snai1|NM_011427	-0.367969	-0.553292	1.517
Fah|NM_010176	0.39913	-0.552893	1.051
Ercc1|NM_007948	-0.166457	-0.552818	2.07
Mfap5|NM_015776	-0.352851	-0.552683	0.364
Chrnb4|NM_148944	0.136266	-0.552667	0.216
Gng3|NM_010316	-0.14621	-0.552572	0.425
Marcksl1|NM_010807	-0.348142	-0.551448	1.393
Mlkl|NM_029005	-0.0102418	-0.55099	0.291
Tgm4|NM_177911	0.0810722	-0.550934	0.255
Fbxo4|NM_134099	-0.0658152	-0.550856	0.908
Gnrh1|NM_008145	0.231847	-0.550258	0.029
Shank3|NM_021423	-0.137489	-0.550206	0.879
Lmtk3|NM_001005511	-0.230687	-0.550066	0.814
Zim1|NM_011769	0.102604	-0.549438	0.607
Gcm1|NM_008103	0.109863	-0.548623	0.528
E2f7|NM_178609	-0.400833	-0.548397	1.436
Chn2|NM_023543	-0.326954	-0.547782	0.061
Fndc1|NM_001081416	-0.010674	-0.54757	0.121
Dhrs1|NM_026819	-0.00549744	-0.547568	0.8
Olfml2b|NM_177068	-0.305496	-0.547541	1.152
Gcnt4|NM_001166065	-0.170908	-0.547524	0.631
Ilvbl|NM_173751	-0.181009	-0.546809	1.725
Serp2|NM_001160326	-0.0156273	-0.546736	0.546
Rapgef3|NM_144850	-0.362036	-0.546563	0.646
Nr4a1|NM_010444	0.010373	-0.546363	1.735
Klhdc8b|NM_030075	-0.0623973	-0.545463	0.485
Dnaja4|NM_021422	-0.253774	-0.544862	0.817
Rasl11b|NM_026878	0.282934	-0.544808	0.808
Bcl2l15|NM_001142960	-0.210926	-0.544414	0.607
Tmem53|NM_026837	0.497313	-0.543503	0.512
Itpripl1|NM_001163527	-0.0170183	-0.54273	0.809
Laptm4a|NM_008640	-0.019845	-0.542549	0.768
Ston1|NM_029858	0.192338	-0.542469	0.91
Utp14b|NM_001136226	-0.163094	-0.54186	1.287
Dlgap4|NM_001042487	-0.327476	-0.54177	2.352
Cdh1|NM_009864	0.000185472	-0.541754	1.269
Cdk6|NM_009873	-0.41962	-0.541171	2.042
Dusp2|NM_010090	0.0789928	-0.540355	1.084
Alox5|NM_009662	-0.0979054	-0.540177	0.364
Ifi35|NM_027320	0.852255	-0.54017	0.67
Fam160a1|NM_172682	0.108879	-0.540112	0.425
Zdhhc8|NM_172151	-0.000668356	-0.540046	0.777
Numbl|NM_010950	-0.21886	-0.539269	0.708
Slc30a5|NM_022885	-0.496985	-0.539028	1.032
Tnrc18|NM_178242	0.0823268	-0.538973	1.787
Sorbs1|NM_009166	0.0672179	-0.538869	1.351
Casp8|NM_001080126	-0.209793	-0.53882	0.243
Crct1|NM_028798	-0.229031	-0.538634	1.092
Mdfi|NM_001109973	0.0703312	-0.538504	1.119
Palm2|NM_172868	-0.072589	-0.53815	0.873
Npr3|NM_008728	-0.149962	-0.538116	0.603
Fam162b|NM_029894	-0.164372	-0.538055	0.232
Exoc6b|NM_177077	0.0265392	-0.537451	0.728
Phlda3|NM_013750	-0.227955	-0.537346	3.192
Wdr91|NM_001013366	-0.0212434	-0.536562	0.65
Anapc2|NM_175300	0.0232314	-0.5364	1.39
Arl10|NM_019968	-0.412513	-0.536158	0.881
Flot2|NM_008028	0.166642	-0.536143	1.236
Serpinb6a|NM_001243192	0.21321	-0.53504	1.105
5430435G22Rik|NM_145509	0.293926	-0.534761	0.182
Gpha2|NM_130453	0.0865212	-0.534459	0.527
1700024G13Rik|NM_001034037	0.629332	-0.534433	0.354
Rnpep|NM_145417	-0.638452	-0.534355	1.816
Mal2|NM_178920	-0.155249	-0.533758	0.243
Parp8|NM_001081009	-0.0104554	-0.533706	0.901
Agpat2|NM_026212	0.0456763	-0.533444	1.724
Samd4b|NM_175021	0.0110693	-0.533176	2.017
Hcfc1r1|NM_181821	-0.0763624	-0.533171	2.464
Slc18a1|NM_153054	-0.0761524	-0.532544	0.454
Slc41a3|NM_001037493	0.322342	-0.531906	0
Spred1|NM_033524	-0.209559	-0.53162	1.472
Dbndd2|NM_001048229	0.189039	-0.531369	0.243
Fbxl16|NM_001164225	-0.484321	-0.53118	1.106
Lime1|NM_023684	0.130557	-0.531071	0.303
Zc3hav1l|NM_172467	-0.0191569	-0.530169	3.513
Pcdh1|NM_029357	-0.237619	-0.529949	0.948
Eif2ak2|NM_011163	-0.361091	-0.529932	0.667
Cmtm3|NM_024217	-0.0771354	-0.529603	0.649
Fbxl8|NM_015821	-0.103414	-0.528725	0.776
Pcsk1|NM_013628	0.0351525	-0.528637	0.609
Dusp5|NM_001085390	-0.00265146	-0.528037	1.153
Mppe1|NM_172630	-0.115791	-0.527768	0.764
1700026L06Rik|NM_027283	0.798122	-0.527569	0.299
Thbs3|NM_013691	-0.434267	-0.527407	0.295
Soat1|NM_009230	-0.225403	-0.527084	1.913
Slc46a1|NM_026740	-0.0460614	-0.526656	0.811
Tspo|NM_009775	0.34754	-0.526446	0.588
Pwwp2b|NM_001098636	-0.416848	-0.526356	1.34
Lzic|NM_026963	-0.143201	-0.525883	1.019
Plscr1|NM_011636	0.157185	-0.525864	1.153
Fam174b|NM_001162532	-0.0380551	-0.525791	0.741
Tmem29|NM_001164683	0.032064	-0.525778	0.725
Bcr|NM_001081412	-0.178135	-0.525532	1.082
Aim1l|NM_001162970	-0.102642	-0.525459	0.683
Klhdc8a|NM_144810	0.127743	-0.524784	0.643
Zwint|NM_025635	0.149697	-0.524622	0.654
Sdccag8|NM_029756	-0.0352206	-0.524587	2.071
H13|NM_010376	0.13969	-0.524129	1.656
D830031N03Rik|NM_001167918	-0.230336	-0.523912	1.344
Guca1a|NM_008189	0.0706216	-0.522843	0.157
Fhl1|NM_001077362	-0.143695	-0.522536	0
Megf8|NM_001160400	-0.150438	-0.522439	2.255
Arhgap28|NM_172964	-0.258213	-0.52222	1.108
Strn3|NM_052973	-0.162508	-0.521845	3.028
Zfp677|NM_172486	-0.267608	-0.521532	0.406
Mob3c|NM_175308	0.255203	-0.521334	0.541
Masp1|NM_008555	0.116688	-0.521311	1.109
Txndc11|NM_029582	-0.0336325	-0.521226	1.274
Slc44a3|NM_145394	0.186095	-0.521161	0.85
Galk1|NM_016905	-0.124119	-0.521117	2.161
Ptger3|NM_011196	0.0861578	-0.520305	0.485
Frmd8|NM_026169	-0.183812	-0.520087	0.485
Hivep1|NM_007772	-0.08949	-0.519704	1.163
Sertad2|NM_001038625	0.11495	-0.519691	3.328
Tctn2|NM_026486	0.31317	-0.51927	0.697
Trip6|NM_011639	-0.397397	-0.5188	2.023
Col4a5|NM_007736	-0.0686193	-0.518775	0.243
Dmrta2|NM_172296	0.0419109	-0.518674	0.91
Fos|NM_010234	-0.0152348	-0.518666	1.352
Slc38a6|NM_001037717	0.200258	-0.518525	2.245
Ldoc1|NM_001018087	0.105649	-0.517984	0.273
Fam20c|NM_030565	-0.0595584	-0.517941	0.937
Wdr13|NM_026137	0.0264147	-0.517753	0.569
Cyp1a1|NM_001136059	0.0282464	-0.516989	0.243
Tsc22d4|NM_029805	0.0496662	-0.516685	2.042
Ly6k|NM_029627	0.467496	-0.516038	0
Cap2|NM_026056	-0.0528256	-0.515985	0.243
Mgat4b|NM_145926	0.150318	-0.5157	0.831
Pkn3|NM_153805	-0.0382161	-0.515534	0.174
Clic1|NM_033444	0.304177	-0.514166	0.505
Hhat|NM_144881	0.212736	-0.51383	0.294
Arhgap21|NM_001128084	-0.0303463	-0.513519	0.243
Sema6a|NM_018744	-0.0909431	-0.513414	2.512
Syde2|NM_001166064	-0.584128	-0.513353	2.243
Klhl5|NM_175174	-0.51925	-0.512974	0.303
Rassf7|NM_025886	0.0995531	-0.512872	1.913
Fosl1|NM_010235	-0.142032	-0.512852	0.789
Tspan6|NM_019656	-0.431511	-0.51265	0.381
Naglu|NM_013792	-0.382429	-0.511406	1.396
Gba2|NM_172692	-0.247196	-0.511316	1.716
St3gal2|NM_009179	0.0437454	-0.511264	1.5
Sh2d4a|NM_028182	-0.00452347	-0.51108	0.182
2900026A02Rik|NM_172884	-0.0855707	-0.510364	0.303
Zadh2|NM_146090	-0.0867739	-0.510186	0.571
Arntl2|NM_172309	0.0829327	-0.51007	0.061
Fzd10|NM_175284	0.186309	-0.509995	1.16
Lrp10|NM_022993	0.181751	-0.5099	0.993
Metrn|NM_133719	-0.229522	-0.509841	0.661
Gltp|NM_019821	0.0948816	-0.509724	1.241
Plcd3|NM_152813	-0.0100378	-0.509607	0.879
Lipa|NM_021460	-0.323415	-0.509546	0.449
Csf2ra|NM_009970	0.128684	-0.509442	0.429
Lyn|NM_010747	-0.0932115	-0.50905	0.318
B4galnt1|NM_027739	-0.0865168	-0.508266	1.439
Cenpt|NM_177150	0.104599	-0.507819	1.517
Mesp2|NM_008589	0.0959497	-0.50742	0.18
Phc2|NM_001195083	0.164968	-0.506912	0.53
Dnajc22|NM_176835	0.260731	-0.506519	1.06
Tceal8|NM_025703	-0.14264	-0.506308	0.303
Ano6|NM_175344	0.000427868	-0.506079	1.335
St5|NM_029811	0.191766	-0.506041	0.822
Acadvl|NM_017366	0.156754	-0.505942	1.125
Arc|NM_018790	-0.0184986	-0.505874	0.667
Tchh|NM_001163098	-0.0672434	-0.505781	0
Hspa2|NM_008301	-0.212864	-0.505755	1.17
Flii|NM_022009	0.0353603	-0.50542	0.551
Vopp1|NM_146168	0.0381354	-0.505241	0.516
Spag9|NM_001199205	0.143333	-0.505215	0.425
Trim56|NM_201373	0.117388	-0.505001	0.667
Lims2|NM_144862	-0.13003	-0.504742	0.519
Pros1|NM_011173	-0.189252	-0.504496	0.473
Slc6a14|NM_020049	0.0900968	-0.504211	0.121
Ctsc|NM_009982	0.0627013	-0.504122	0.952
Btg2|NM_007570	0.210779	-0.503945	1.666
Tubgcp6|NM_001163319	-0.01748	-0.503115	1.206
Actr3|NM_023735	-0.0885881	-0.503106	4.294
Matn3|NM_010770	-0.136215	-0.50262	0.919
Tmem159|NM_145586	0.321801	-0.502438	0.66
Cep164|NM_001081373	-0.344586	-0.502426	0.666
Pde6g|NM_012065	0.138352	-0.502351	0.479
Cdh2|NM_007664	-0.167275	-0.502279	0.243
Rtp4|NM_023386	0.160826	-0.502084	0.546
Hebp2|NM_019487	-0.129576	-0.501149	1.214
Bok|NM_016778	-0.242248	-0.500719	1.414
Lamb1|NM_008482	-0.205232	-0.500441	1.168
Usp12|NM_011669	-0.23972	-0.500256	1.931
Emilin2|NM_145158	-0.0555725	-0.500135	0.52
Csnk1e|NM_013767	-0.30335	-0.499804	0.607
Ccdc122|NM_175369	-0.210168	-0.499637	1.249
Smad6|NM_008542	-0.379753	-0.499547	1.682
Cst3|NM_009976	0.674532	-0.499435	1.8
Ap2a2|NM_007459	-0.229471	-0.499347	1.085
Slc19a3|NM_030556	-0.198467	-0.499269	1.22
Fbxo2|NM_176848	0.0338897	-0.499121	0.474
Camk1|NM_133926	-0.168425	-0.498732	0.85
Atp11a|NM_015804	-0.088663	-0.498574	0.485
Mapk11|NM_011161	-0.129319	-0.498463	0.323
Glrx|NM_053108	0.0665682	-0.498344	0.366
Abca7|NM_013850	-0.00600331	-0.498126	0.634
Mfap2|NM_008546	-0.0369621	-0.498058	0.303
Crot|NM_023733	0.0699886	-0.497777	1.318
Tmem59l|NM_182991	-1.0593	-0.497762	0.288
Lypd6|NM_177139	0.167427	-0.496987	1.379
1700017B05Rik|NM_028820	-0.224178	-0.496875	1.214
Ampd2|NM_028779	-0.157596	-0.496779	1.166
Pgs1|NM_133757	0.146857	-0.49666	1.079
Nos1ap|NM_001109985	-0.0165455	-0.496411	1.039
Pllp|NM_026385	-0.00998429	-0.496348	0.569
Tlx3|NM_019916	-0.0368089	-0.496179	0.243
Dusp8|NM_008748	-0.127266	-0.495706	1.288
Lrrfip2|NM_027742	-0.143439	-0.49567	0.893
Pdcd6ip|NM_011052	-0.0421186	-0.495367	1.327
Shroom2|NM_172441	-0.236626	-0.494871	0.993
Hps5|NM_001167864	0.0917812	-0.494778	1.751
Comp|NM_016685	-0.0244178	-0.494661	0.353
Gm266|NM_001033248	0.0486096	-0.494594	1.182
Nomo1|NM_153057	-0.038832	-0.494279	1.144
Actc1|NM_009608	-0.0502132	-0.493549	0.187
Ehd4|NM_133838	-0.147302	-0.493514	0.789
Gnb2|NM_010312	0.0169846	-0.493512	1.84
Ubc|NM_019639	-0.0756203	-0.493372	1.254
Inpp5a|NM_183144	0.00950262	-0.493293	1.271
Nsun4|NM_028142	0.0206558	-0.49329	1.713
Msln|NM_018857	-0.1641	-0.493269	0.061
Map3k7|NM_172688	-0.285059	-0.493214	2.083
Gabrb3|NM_008071	0.184519	-0.492944	0.512
Pitpnm2|NM_011256	-0.106258	-0.492782	0.08
Galnt14|NM_027864	0.0697428	-0.492747	0.85
Plekhh3|NM_146030	0.436273	-0.492429	0.703
Cchcr1|NM_146248	0.220871	-0.492385	1.699
Clcn4-2|NM_011334	0.0840482	-0.491853	2.538
Npy|NM_023456	0.693067	-0.49167	0.313
Mknk1|NM_021461	-0.214611	-0.491431	0.944
Cacna1h|NM_021415	-0.0383502	-0.491373	0.9
Slc35b3|NM_001170431	0.190694	-0.491184	0.257
Jak2|NM_008413	0.105759	-0.491084	1.307
Lysmd2|NM_027309	-0.563465	-0.491065	0.99
Trabd|NM_026485	-0.16422	-0.490842	1.66
Eif4g3|NM_172703	-0.869677	-0.490593	1.218
Mex3c|NM_001039214	-0.488108	-0.49056	1.51
Ckap4|NM_175451	-0.232405	-0.490413	0.925
Pramel1|NM_031377	-0.143602	-0.490036	0.266
Fadd|NM_010175	0.0400716	-0.489922	0.948
Sgpp1|NM_030750	-0.0613183	-0.489921	0.365
Ppp1r2|NM_025800	-0.0395656	-0.48938	0.909
Eme2|NM_001163102	-0.272328	-0.488318	0.802
Zfp54|NM_011760	-0.380452	-0.488153	0.962
Zfp963|NM_001200023	-0.201935	-0.487915	1.953
Slc26a10|NM_177615	-0.158755	-0.487595	0.394
Iigp1|NM_021792	0	-0.486742	0.166
Fam109b|NM_177391	-0.318633	-0.486539	0.731
Man2c1|NM_028636	-0.0997541	-0.486406	1.422
Map3k3|NM_011947	0.156484	-0.486329	1.252
Gng7|NM_010319	-0.234794	-0.4862	0.485
Gria3|NM_016886	-0.0795219	-0.485535	0.061
Rcn2|NM_011992	0.0334362	-0.485299	0.982
Frzb|NM_011356	0.0273692	-0.485273	0.685
Cetn4|NM_145825	-0.213659	-0.485089	0.364
Parp10|NM_001163576	0.600855	-0.484854	0.655
Kremen1|NM_032396	0.307653	-0.48449	0.512
Ier5l|NM_030244	0.32704	-0.484467	1.471
Pttg1|NM_001131054	0.339444	-0.483955	0.303
Ldlr|NM_010700	0.024962	-0.483731	1.085
Lgmn|NM_011175	0.183607	-0.483323	0.737
Rab20|NM_011227	0.0591075	-0.483269	0.692
Notch3|NM_008716	-0.150414	-0.483116	1.092
Adam15|NM_009614	0.191838	-0.483011	1.247
Macc1|NM_001163136	0	-0.482747	0.015
Nckap1l|NM_153505	-0.177202	-0.481841	0.182
Clip2|NM_009990	0.172529	-0.481722	0.572
Zswim4|NM_172503	-0.110206	-0.481508	1.682
Wnt10b|NM_011718	0	-0.481016	0.494
Fam43b|NM_001081672	-0.123123	-0.480987	0.243
Gal3st4|NM_001033416	-0.0882191	-0.480757	0.418
Cacng6|NM_133183	-0.71526	-0.480716	0.465
Pld1|NM_008875	-0.105802	-0.48062	0.364
Brdt|NM_054054	0.179155	-0.480467	0.243
Mpp5|NM_019579	-0.397971	-0.480388	1.605
Rnpepl1|NM_181405	-0.270625	-0.480321	1.52
Gale|NM_178389	0.0492076	-0.479929	0.256
Garnl3|NM_178888	0.0179346	-0.479687	0.013
Fv1|NM_010244	0.124549	-0.479621	0.759
Clk3|NM_007713	0.163132	-0.479116	0.73
H1f0|NM_008197	-0.637086	-0.479114	2.135
Syne1|NM_022027	0.231718	-0.479027	0.061
Nos2|NM_010927	-0.0656859	-0.478984	0.36
Zdhhc18|NM_001017968	0.32703	-0.478827	1.044
Gast|NM_010257	0.151171	-0.478798	0.517
Camkk1|NM_018883	0.0848832	-0.478131	0.728
Plekha4|NM_148927	0.0487273	-0.477996	1.06
Ppap2c|NM_015817	0.166822	-0.477948	0.854
Klf7|NM_033563	0.40611	-0.47789	1.301
Tmem217|NM_001162902	-0.0426836	-0.477672	0.485
Prkci|NM_008857	0.0728202	-0.477304	0.907
Hsdl2|NM_024255	-0.16538	-0.476741	0.939
6430531B16Rik|NM_001033465	0.184922	-0.476666	0.105
Spef1|NM_027641	0.17429	-0.476497	0.667
Gal3st1|NM_001177691	0.322157	-0.476269	0.451
Jag2|NM_010588	-0.262664	-0.47612	0.684
Adss|NM_007422	-0.240515	-0.47452	2.656
Rit1|NM_009069	0.0896956	-0.473994	0.728
Ssh1|NM_198109	-0.201971	-0.473856	1.173
Btbd6|NM_201646	0.164716	-0.473824	0.901
Slx4|NM_177472	0.0567206	-0.4736	0.061
Tmem128|NM_025480	0.129084	-0.473066	0.963
Oxct1|NM_024188	0.0201262	-0.472888	1.625
Agl|NM_001081326	0.0450562	-0.472833	2.193
Hecw2|NM_172655	-0.269266	-0.472804	1.108
Lrp1|NM_008512	0.035314	-0.472697	1.156
Cnpy4|NM_178612	0.111569	-0.47262	0.886
Slc25a4|NM_007450	-0.255239	-0.472418	1.316
Tigit|NM_001146325	0	-0.471076	0.121
Krt16|NM_008470	0.220245	-0.471012	0
Il11|NM_008350	0.2529	-0.470721	0.19
Speg|NM_001173477	-0.341249	-0.470276	2.16
Ccdc106|NM_146178	-0.650095	-0.470227	0.388
Rps6ka3|NM_148945	-0.203908	-0.470174	0.401
Yod1|NM_178691	-0.0597858	-0.469731	1.756
Gm2382|NM_001128601	0.605179	-0.469471	1.159
Mlana|NM_029993	0.718819	-0.469097	0.526
Actg1|NM_009609	-0.176951	-0.468667	2.975
AU040320|NM_133886	0.299262	-0.468575	2.245
Kdelr2|NM_025841	-0.235316	-0.468214	0.82
Ppp1r14a|NM_026731	0.241848	-0.467709	1.317
Cables2|NM_145851	-0.460495	-0.467573	0.979
Acyp2|NM_029344	0.392364	-0.467518	1.047
Bmpr2|NM_007561	-0.272449	-0.467492	0.893
Nrm|NM_134122	0.314762	-0.467408	1.577
Irf5|NM_001252382	0.565539	-0.467176	0.072
Sema7a|NM_011352	-0.00600575	-0.466973	0.547
Cyba|NM_007806	0.31592	-0.46694	0.667
Chd3|NM_146019	-0.16488	-0.466859	0.317
Sh3glb1|NM_019464	-0.258514	-0.466502	1.855
Eml5|NM_001081191	-0.292091	-0.466273	0.923
Cntf|NM_170786	-0.105403	-0.465562	0.14
Tspan32|NM_020286	-0.110592	-0.465357	0.351
Cnih2|NM_009920	-0.42835	-0.464991	0.562
Dennd3|NM_001081066	0.272254	-0.464977	0.97
Tmem9|NM_001160146	0.192461	-0.464782	1.425
Plin5|NM_025874	0.222704	-0.464747	0.182
Ankrd33b|NM_027496	-0.117171	-0.464617	1.193
Il20rb|NM_001033543	0.105846	-0.464504	0.106
Ttc9|NM_001033149	-0.330417	-0.46445	1.223
Dact1|NM_021532	-0.078038	-0.464271	0.368
Csnk2a2|NM_009974	-0.288571	-0.464248	0.567
Iqsec1|NM_001134384	-0.230295	-0.46423	0.303
Rhoj|NM_023275	0.0190439	-0.463815	0.478
Nxf7|NM_130888	0.377508	-0.463697	0
1700101E01Rik|NM_001166705	-0.131855	-0.463398	0.965
Gpx3|NM_008161	-0.651783	-0.463168	0.971
Fam107a|NM_183187	0.0382132	-0.463107	1.113
S1pr1|NM_007901	-0.061528	-0.462418	1.017
Pcsk7|NM_008794	0.0394832	-0.461986	1.342
Dydc2|NM_027717	-0.149319	-0.461789	0.061
Parp3|NM_145619	-0.279358	-0.461441	1.724
Cdc42bpb|NM_183016	-0.103841	-0.461312	2.976
Camk2g|NM_178597	-0.253026	-0.461167	1.191
Rnf126|NM_144528	-0.365095	-0.461149	2.281
Scara3|NM_172604	0.0155669	-0.461102	0.413
Krt17|NM_010663	0.209432	-0.461003	0.182
Kcmf1|NM_019715	0.0730001	-0.460971	0.244
Trdmt1|NM_010067	-0.780088	-0.460404	1.086
Slc37a4|NM_008063	0.127893	-0.460329	0.546
Pdgfc|NM_019971	-0.486024	-0.459943	1.06
Fam69a|NM_026062	-0.222752	-0.459904	1.138
Fads3|NM_021890	-0.130322	-0.459878	0.958
Anln|NM_028390	0.0360493	-0.458936	2.245
Zdhhc15|NM_175358	-0.127426	-0.458877	0.503
Bves|NM_024285	-0.246433	-0.458695	1.153
Stap2|NM_145934	-0.0125984	-0.458544	0.333
Srf|NM_020493	-0.300344	-0.458189	2.609
Tecpr2|NM_001081057	-0.00133893	-0.458152	1.509
Nipal2|NM_145469	0	-0.457962	0.471
Tmcc2|NM_178874	-0.119215	-0.457715	0.843
Ctif|NM_201354	-0.134158	-0.457588	0.45
Chsy1|NM_001081163	-0.429019	-0.457474	1.358
Creb3l2|NM_178661	0.343481	-0.457117	1.068
Idi1|NM_145360	-0.617667	-0.456635	1.067
Rrbp1|NM_133626	-0.353809	-0.456429	1.137
Nrg1|NM_178591	-0.274759	-0.456379	0.266
Bcl10|NM_009740	-0.225024	-0.456318	1.775
Gata6|NM_010258	0.280125	-0.456115	0.516
Nhs|NM_001081052	-0.185003	-0.455798	0.384
Fam20b|NM_145413	-0.201939	-0.455777	1.809
Meis3|NM_008627	-0.0716174	-0.455723	0.527
BC068281|NM_173416	-0.27347	-0.455698	0.652
Unc13b|NM_021468	-0.172634	-0.455695	0.368
Slco5a1|NM_172841	0.182571	-0.455346	2.869
Lbx1|NM_010691	-0.142793	-0.454553	0.613
Samhd1|NM_018851	-0.180372	-0.454479	1.191
Reck|NM_016678	-0.0947479	-0.454397	1.432
Mtch1|NM_019880	0.0607227	-0.453963	1.955
Sp110|NM_175397	0.1309	-0.453915	0.565
Smyd1|NM_009762	-0.339655	-0.453843	0.121
Timp3|NM_011595	-0.163036	-0.453814	0.726
Dnd1|NM_173383	-0.179071	-0.453531	0.607
Itgb8|NM_177290	0	-0.452946	1.714
Col22a1|NM_027174	0.0892954	-0.45247	0.079
Rhbg|NM_021375	0.011248	-0.452243	0.369
Vpreb3|NM_009514	-0.0299028	-0.451625	0.01
Kctd9|NM_134073	0.122246	-0.45094	1.604
Pex6|NM_145488	-0.202488	-0.450724	0.99
Prr14|NM_145589	-0.137323	-0.450504	1.032
Plod3|NM_011962	0.0132014	-0.450057	1.421
Tmed5|NM_028876	-0.210943	-0.449143	2.06
Rcan2|NM_030598	-0.217693	-0.448841	0.036
Wasf2|NM_153423	-0.150557	-0.448724	0.685
Prr24|NM_001136270	0.200265	-0.447427	0.653
Jup|NM_010593	0.0637743	-0.447201	1.227
Masp2|NM_010767	0.591068	-0.447189	0.043
Bdkrb2|NM_009747	0.143865	-0.447159	0.607
Tmem70|NM_027415	-0.189104	-0.447138	1.335
Ccdc102a|NM_001033533	-0.200721	-0.445997	0.812
Arg2|NM_009705	-0.34798	-0.445794	0.54
Gm7120|NM_001177666	0.0159967	-0.445754	0.927
Plod2|NM_011961	-0.478359	-0.445745	1.109
Snx33|NM_175483	-0.203	-0.445447	1.489
Msn|NM_010833	0.182721	-0.445203	0.182
Itch|NM_008395	-0.0817068	-0.445057	0.919
Cdkl3|NM_153785	-0.24556	-0.443951	1.699
Ipo13|NM_146152	-0.199817	-0.443869	1.574
Sh3bp5l|NM_024480	0.155414	-0.443617	1.018
Fam3a|NM_025473	0.0759989	-0.443323	0.971
Egfl8|NM_152922	-0.117493	-0.443261	0.326
Park2|NM_016694	-0.501289	-0.443198	0.455
Cpox|NM_007757	-0.178351	-0.443012	0.571
Gmip|NM_198101	0.102293	-0.442888	1.125
Mfn1|NM_024200	-0.0236445	-0.442744	0.86
Tbrg1|NM_025289	0.267063	-0.442031	1.69
Plat|NM_008872	0.0861866	-0.44191	0.787
Tmod3|NM_016963	-0.242572	-0.441833	0.442
Cpd|NM_007754	-0.0567622	-0.44178	0.728
Klhl25|NM_182782	0.253803	-0.441693	1.03
Rreb1|NM_001177869	-0.0842146	-0.441545	0
B3gat3|NM_024256	0.0748163	-0.441261	0.33
Chmp1b|NM_024190	-0.152343	-0.441196	1.274
Mkl1|NM_001082536	0.0338678	-0.440441	1.075
Foxj2|NM_021899	0.176919	-0.439779	1.144
Tnks1bp1|NM_001081260	0.151591	-0.439656	0.727
Fas|NM_007987	0.0718081	-0.439509	0.537
Cd248|NM_054042	-0.121715	-0.43851	0.861
Tpd52l1|NM_009413	0.17262	-0.438063	1.153
Cdc42se1|NM_001038708	0.214261	-0.437999	1.41
Magi2|NM_015823	0.0243179	-0.43789	0.722
Zmynd15|NM_001029929	-0.23492	-0.437755	1.947
Lrrc8c|NM_133897	-0.359104	-0.437117	1.276
Yipf2|NM_138303	0.115471	-0.4366	2.234
Zfp964|NM_001177527	0.0120536	-0.43656	1.11
Cebpa|NM_007678	-0.0723658	-0.436554	0.679
Sh2d3c|NM_001252547	0.121086	-0.436473	0.728
Fam57b|NM_001146347	-0.229446	-0.436422	0.182
Cd276|NM_133983	0.178987	-0.436368	0
Rab11fip3|NM_001162869	-0.0344556	-0.436141	0.927
Heatr6|NM_145432	-0.437528	-0.436114	1.092
Mettl15|NM_029790	0.342254	-0.435868	0.576
Kif7|NM_010626	-0.00402175	-0.435608	0
Rftn1|NM_181397	0.204817	-0.435602	0.556
Vezf1|NM_016686	-0.117212	-0.434972	0.916
Numb|NM_010949	0.0166262	-0.434939	0.06
Foxp4|NM_028767	-0.032256	-0.434925	1.527
Dnase1l1|NM_001172154	-0.239713	-0.434366	0.303
Gm4832|NM_001190356	-0.0382457	-0.433958	0.083
Lsr|NM_017405	-0.0351692	-0.433952	1.717
Moxd1|NM_021509	-0.165423	-0.433743	0.667
Ksr1|NM_013571	0.176858	-0.433663	1.032
Icam4|NM_023892	0.0437916	-0.433369	2.195
Dhcr24|NM_053272	-0.277439	-0.433168	1.285
Ano5|NM_177694	0	-0.433148	1.408
Bscl2|NM_008144	0.116658	-0.433093	0.425
Slc36a4|NM_172289	0.0857523	-0.432991	0.485
Dhrs7|NM_025522	-0.165815	-0.432682	1.171
Irak2|NM_172161	0.464021	-0.432045	0.996
Foxm1|NM_008021	-0.00873531	-0.432022	1.524
Wdr35|NM_172470	-0.259881	-0.431755	0.614
Prickle3|NM_175097	0.494389	-0.431448	0.182
Mab21l3|NM_172295	0.0974052	-0.431016	0.858
Akr1c14|NM_134072	-0.0198944	-0.43083	0
1110012L19Rik|NM_026787	0.185721	-0.430407	0.425
Rdh12|NM_030017	0.0185399	-0.430356	0.607
Bin1|NM_009668	-0.285193	-0.430225	0.655
Vgll1|NM_133251	0	-0.430189	0.208
Abcc1|NM_008576	0.125568	-0.42934	0.704
Maged2|NM_030700	0.114536	-0.429256	0.182
Syn1|NM_013680	0.390578	-0.429077	1.044
H2-Bl|NM_008199	0.733768	-0.428983	1.566
Tex101|NM_019981	0.117518	-0.428809	0.303
Vash1|NM_177354	-0.670617	-0.428193	0.554
Creld2|NM_029720	-0.0125979	-0.428158	1.172
Rgs10|NM_026418	-0.291269	-0.428079	0.75
Phka1|NM_173021	-0.0686201	-0.427967	0.303
Ptpn9|NM_019651	0.124587	-0.427111	1.316
Capzb|NM_001037761	-0.103676	-0.427001	0.777
Surf4|NM_011512	0.0183451	-0.426877	1.57
Magee1|NM_053201	-0.0561867	-0.426784	0.182
Sptlc2|NM_011479	0.0218965	-0.42611	1.222
Echdc2|NM_026728	0.167041	-0.426039	0.553
Baz2b|NM_001001182	-0.0892368	-0.425933	0.801
Diap3|NM_019670	0.133393	-0.425436	0.946
Golim4|NM_175193	-0.128584	-0.425314	1.05
Mpp2|NM_016695	-0.080917	-0.424736	0.399
Sec24b|NM_207209	-0.0964829	-0.424433	0.998
Spag5|NM_017407	-0.0928736	-0.423609	0.971
Stxbp6|NM_144552	-0.082696	-0.423268	1.275
Plekho2|NM_153119	0.119712	-0.423165	0.376
Dcun1d2|NM_001042651	-0.386094	-0.422974	0.582
Ccdc159|NM_025977	-0.250725	-0.422946	1.304
Ifrd2|NM_025903	-0.122393	-0.422855	1.984
Cux1|NM_009986	-0.0988947	-0.422668	1.4
Xpnpep2|NM_133213	-0.172894	-0.422404	0.659
Pea15a|NM_011063	-0.342557	-0.422156	1.034
Dlx6|NM_010057	0.0843257	-0.422042	0.469
Alas2|NM_009653	-0.00115204	-0.422021	0
Fam65c|NM_001080708	-0.0320359	-0.42199	0.149
Plekhg3|NM_153804	-0.244253	-0.421884	0.907
Carhsp1|NM_025821	0.0840446	-0.421523	0.808
Men1|NM_008583	-0.0760531	-0.421445	1.18
Psmb10|NM_013640	0.392857	-0.42134	0.68
Pde4dip|NM_001039376	-0.112876	-0.421335	0.364
Fam160b2|NM_194345	-0.134084	-0.421271	1.348
Bmp6|NM_007556	-0.435602	-0.421237	0.397
Fahd2a|NM_029629	-0.146258	-0.421235	0.499
Polr3gl|NM_027241	0.224361	-0.421199	0.728
Mob1b|NM_026735	-0.0840801	-0.421198	0.906
Aak1|NM_177762	-0.164662	-0.421167	0.416
Iffo1|NM_001039669	0.22942	-0.420283	1.251
Luzp1|NM_024452	-0.175083	-0.419899	1.523
Mpped2|NM_029837	0.394317	-0.419856	0.248
Atg7|NM_028835	-0.0587088	-0.419607	0.487
Dmpk|NM_032418	-0.145905	-0.419479	0.441
Qpctl|NM_026111	-0.5155	-0.419256	0.52
Prkar2a|NM_008924	0.284652	-0.419149	0.632
Dok1|NM_010070	-0.235564	-0.419115	0.61
Nradd|NM_026012	0.240241	-0.418944	0.897
Gpr137|NM_001177361	0.256852	-0.4189	1.168
Sytl1|NM_031393	-0.221962	-0.418474	0.303
Sgcb|NM_011890	-0.176692	-0.417975	0.994
Defb37|NM_181683	0	-0.417838	0
Fzd1|NM_021457	0.0165069	-0.417734	1.876
Cd83|NM_009856	0.0336737	-0.41729	0.182
Wdr90|NM_001163766	0.146171	-0.417271	1.032
Pyy|NM_145435	-0.662518	-0.417053	0.239
Btbd1|NM_146193	-0.0631884	-0.417032	1.302
Flt3l|NM_013520	-0.328802	-0.416953	1.325
Trim44|NM_020267	0.0236672	-0.416615	0.758
Igsf10|NM_001162884	-0.209296	-0.416586	0.485
Spryd3|NM_001033277	0.0937136	-0.416176	0.667
Nkx2-2|NM_010919	0.0121908	-0.416048	0.061
Tnik|NM_026910	0.127331	-0.415957	0.525
Trim34a|NM_030684	0.175058	-0.415812	0.865
Mettl7b|NM_027853	0	-0.415511	0.021
Slc4a7|NM_001033270	-0.192038	-0.4155	0.546
Mdm2|NM_010786	0.00887811	-0.415405	0.927
Bach2|NM_001109661	-0.0825687	-0.415361	0.121
Vwa1|NM_147776	0.112172	-0.415193	0.647
Cav1|NM_001243064	0	-0.414859	0.485
Tnnc2|NM_009394	-0.182011	-0.414855	0.061
Mtmr14|NM_026849	0.0443752	-0.414784	2.116
Tubgcp4|NM_153387	0.00754958	-0.41475	1.603
Arf3|NM_007478	-0.209297	-0.414508	1.504
C130074G19Rik|NM_178692	-0.174766	-0.4137	0.983
Thap2|NM_025780	-0.557365	-0.413317	1.531
Pip5k1a|NM_008847	0.0380915	-0.413255	1.832
Pfkfb4|NM_173019	0.148413	-0.41324	1.053
Fbxo47|NM_001081435	-0.056752	-0.412971	2.464
Cdh24|NM_199470	-0.269334	-0.412951	0.974
Atg16l2|NM_001111111	0.0399376	-0.412841	1.794
Zdhhc2|NM_178395	0.0800414	-0.41284	0.916
Nr6a1|NM_010264	-0.209395	-0.412697	1.064
Got1l1|NM_029674	-0.118798	-0.412648	0.243
Chka|NM_013490	-0.299387	-0.41259	2.029
Parp9|NM_030253	0.324706	-0.412375	0.436
Tnfsf15|NM_177371	0	-0.412097	0.303
Khnyn|NM_027143	0.000620375	-0.411762	1.833
Apaf1|NM_009684	-0.146206	-0.410796	2.105
Gm5294|NM_001195128	-0.249795	-0.41044	0.121
Tmem106c|NM_201359	-0.0562042	-0.410197	1.37
Reep4|NM_180588	-0.230112	-0.409991	0.352
Tank|NM_001164072	0.0784691	-0.409968	0.984
Cd81|NM_133655	0.0469057	-0.409947	0.873
Csrnp1|NM_153287	-0.0450871	-0.409872	1.637
Pdia5|NM_028295	0.377083	-0.409857	1.958
Klhl20|NM_001039482	-0.358492	-0.408662	2.524
Zfp276|NM_020497	-0.0692195	-0.408658	0.57
B3gnt8|NM_146184	0.106192	-0.408639	0.191
Ang|NM_007447	-0.287633	-0.408471	0.104
Shroom3|NM_001077596	-0.125317	-0.408463	1.396
Zfp609|NM_172536	-0.0942085	-0.408016	2.412
Mamld1|NM_001256048	-0.0191111	-0.407977	0.145
Sike1|NM_025679	0.0981396	-0.407968	0.72
Ptpru|NM_011214	-0.395863	-0.40763	1.174
Tmem179b|NM_026325	-0.349205	-0.407576	1.464
Larp6|NM_026235	-0.000965643	-0.407575	0.483
Nme5|NM_080637	0.399256	-0.407186	0.303
Alox12|NM_007440	0.0137698	-0.407139	0.667
Cd274|NM_021893	0.0880591	-0.407072	0.792
Irx4|NM_018885	0.0326235	-0.407055	0.405
Ranbp6|NM_177721	-0.246718	-0.406981	0.707
Uxs1|NM_026430	0.314312	-0.406804	2.436
Rad23b|NM_009011	-0.860993	-0.406691	2.094
Bcl2l12|NM_029410	0.135228	-0.406672	0.876
Ncoa6|NM_019825	-0.0031646	-0.406089	0
Zmynd8|NM_027230	0.0566959	-0.40571	0.243
A230065H16Rik|NM_001101503	-0.340794	-0.405657	0.805
Ankrd23|NM_153502	-0.183796	-0.404995	0
Ercc5|NM_011729	-0.114074	-0.404958	1.498
Sox10|NM_011437	-0.258872	-0.404923	0.547
Pla2g6|NM_016915	-0.119443	-0.404809	1.288
Dusp6|NM_026268	-0.509886	-0.404499	2.277
Ccdc114|NM_001033243	-0.110022	-0.404447	0.199
Cdh3|NM_001037809	-0.116096	-0.404201	1.072
Iqgap3|NM_001033484	-0.0128853	-0.403864	1.112
Ap1s1|NM_007457	0.201249	-0.403284	1.827
Tnfrsf22|NM_023680	0.175923	-0.403143	0.364
Pak6|NM_001145854	0.163601	-0.403122	0.625
Ankrd44|NM_001081433	0.0324443	-0.403031	1.101
Ccne2|NM_009830	0.475171	-0.402785	1.994
AI413582|NM_001002895	0.176046	-0.402635	1.342
Tmsb10|NM_001190327	0.0218758	-0.401915	0.947
Mylip|NM_181043	0.0796757	-0.401864	1.094
Myo5b|NM_201600	0.0340734	-0.401194	0.791
Tmem214|NM_144525	-0.0989918	-0.401065	1.881
Rnd1|NM_172612	0.156663	-0.400621	1.187
Cpne8|NM_025815	0.0887277	-0.400335	0.485
Whrn|NM_028640	-0.0883772	-0.400153	0.425
Akt1|NM_009652	0.0367469	-0.400096	0.812
Tmem127|NM_175145	0.0701271	-0.399823	1.692
Epo|NM_007942	-0.372998	-0.399628	0.364
Sertad1|NM_018820	-0.298961	-0.399577	1.063
Dcp1a|NM_133761	-0.353789	-0.399204	1.82
C2cd2l|NM_027909	0.00783339	-0.399123	1.222
Psme2|NM_001029855	0.304833	-0.398837	1.134
Alcam|NM_009655	-0.0635366	-0.398824	1.21
Tmod2|NM_016711	-0.191969	-0.398149	0.912
Lrrc58|NM_177093	-0.249233	-0.39767	2.148
Hmgxb4|NM_178017	-0.0121247	-0.397562	1.987
Mtap|NM_024433	-0.0856627	-0.397081	3.972
H2-Q10|NM_010391	-0.0877323	-0.39708	0.352
Hdac1|NM_008228	-0.193887	-0.396994	2.077
Jph1|NM_020604	-0.771745	-0.39695	2.231
Klhl9|NM_172871	-0.290423	-0.396631	1.425
Rnf215|NM_027859	0.274682	-0.396477	0.52
Tmem150c|NM_182841	-0.107753	-0.39611	0.096
Rem1|NM_009047	-0.383421	-0.396072	0.333
Hspa5|NM_022310	-0.113386	-0.396065	1.471
Pon2|NM_183308	-0.472345	-0.395818	0.546
Loxl2|NM_033325	-0.258268	-0.395818	0.667
Cd59a|NM_007652	-0.158983	-0.39573	0.466
Mprip|NM_201245	-0.220064	-0.395407	1.456
Pdx1|NM_008814	0.0777021	-0.395291	0.712
Akap5|NM_001101471	-0.102739	-0.395207	0.374
Abcc10|NM_170680	0.0426262	-0.395146	1.446
Cnp|NM_001146318	-0.365691	-0.394844	0.28
Syt13|NM_030725	-0.457912	-0.394202	0.847
Zfand3|NM_148926	-0.261916	-0.394113	0.942
Ccdc148|NM_001001178	0.0623897	-0.394089	0.559
Mafk|NM_010757	-0.108808	-0.394072	1.346
Gchfr|NM_177157	0.0333863	-0.393999	0.364
Rad52|NM_011236	-0.405673	-0.393764	1.249
Sc5d|NM_172769	-0.156904	-0.393751	1.191
Lman1|NM_027400	-0.265491	-0.393718	1.092
Aup1|NM_007517	-0.144367	-0.39368	1.63
Stxbp1|NM_001113569	0.14176	-0.393576	1.092
Itpkc|NM_181593	0.141006	-0.393442	1.39
Dos|NM_001195268	-0.468478	-0.39343	0.657
Rfx6|NM_177306	-0.0184694	-0.393424	0
Kif21b|NM_001039472	-0.238334	-0.393194	0.681
Tgfa|NM_031199	-0.121193	-0.393153	0.607
Ccbl1|NM_172404	0.0991495	-0.393118	0.728
Yipf3|NM_145353	0.0947671	-0.392998	0.425
F2r|NM_010169	-0.701648	-0.392898	1.396
Gucy1a3|NM_021896	0.0333201	-0.392402	0.306
Tfcp2|NM_033476	-0.191103	-0.392146	1.039
Proca1|NM_001045516	0.0450003	-0.391843	0.324
Tnfrsf11a|NM_009399	-0.0414643	-0.391742	0.91
Anxa4|NM_013471	-0.0220988	-0.391518	0.243
Fcho1|NM_028715	-0.138531	-0.391401	0.643
Eif4e3|NM_025829	-0.233627	-0.391297	0.342
Ppap2a|NM_008903	-0.206218	-0.391225	0.85
Sh3tc1|NM_194344	-0.138911	-0.391178	0.182
Clk2|NM_007712	-0.169479	-0.391048	1.396
Ripk1|NM_009068	-0.115762	-0.390849	1.012
Nudt2|NM_025539	-0.372336	-0.390357	1.102
Bsdc1|NM_133889	0.0671616	-0.390307	1.173
Triobp|NM_001024716	0.0164952	-0.390239	1.402
Scyl1|NM_023912	-0.0169728	-0.390181	1.12
Sfxn3|NM_053197	0.0814136	-0.389982	0.914
Tmem168|NM_028990	-0.168696	-0.389965	0.98
Itm2c|NM_022417	0.0835275	-0.389794	0.926
Tmem110|NM_028839	-0.00858369	-0.389676	1.464
Rbm18|NM_026434	0.124416	-0.389531	0.469
Scmh1|NM_013883	0.0497352	-0.389184	1.164
Atg2a|NM_194348	0.257316	-0.389102	0.763
Galns|NM_016722	0.0430774	-0.388783	1.04
Yaf2|NM_024189	-0.0655293	-0.38871	1.325
Dip2a|NM_001081419	0.239931	-0.388675	0.91
Whsc1|NM_175231	-0.113247	-0.388651	0.061
[truncated: 12,991 more rows]

## Sheet: Figure 4-figure supplement 1A
nid00158(3)$	more	S4_counted.out
threshold	1	1
total	52489	100
intergenic	16880	32.16		Intergenic	0.3216
ds	1	0		Exon	0.0147
exon	771	1.47		Intron	0.1986
intron	10426	19.86		Upstream	0.1818
ups	9542	18.18		Core	0.2833
core	14869	28.33

## Sheet: Figure 4-figure supplement 1C
Motif Name	Consensus	P-value	Log P-value	q-value (Benjamini)	# of Target Sequences with Motif(of 52493)	% of Target Sequences with Motif	# of Background Sequences with Motif(of 13616)	% of Background Sequences with Motif
TEAD4(TEA)/Tropoblast-Tead4-ChIP-Seq(GSE37350)/Homer	CCWGGAATGY	1e-285	-657.1	0	12446	0.2371	1416.1	0.104
TEAD(TEA)/Fibroblast-PU.1-ChIP-Seq(Unpublished)/Homer	YCWGGAATGY	1e-204	-471.1	0	10102	0.1925	1203.3	0.0884
TEAD2(TEA)/Py2T-Tead2-ChIP-Seq(GSE55709)/Homer	CCWGGAATGY	1e-193	-445.5	0	8696	0.1657	972.4	0.0714
Zic3(Zf)/mES-Zic3-ChIP-Seq(GSE37889)/Homer	GGCCYCCTGCTGDGH	1e-80	-184.3	0	7834	0.1493	1212.8	0.0891
Unknown-ESC-element(?)/mES-Nanog-ChIP-Seq(GSE11724)/Homer	CACAGCAGGGGG	1e-76	-176.9	0	7175	0.1367	1090.1	0.0801
Jun-AP1(bZIP)/K562-cJun-ChIP-Seq(GSE31477)/Homer	GATGASTCATCN	1e-72	-166.9	0	2279	0.0434	187.4	0.0138
Fosl2(bZIP)/3T3L1-Fosl2-ChIP-Seq(GSE56872)/Homer	NATGASTCABNN	1e-71	-165.4	0	2785	0.0531	270.6	0.0199
Fra2(bZIP)/Striatum-Fra2-ChIP-Seq(GSE43429)/Homer	GGATGACTCATC	1e-71	-165	0	3505	0.0668	395.9	0.0291
JunB(bZIP)/DendriticCells-Junb-ChIP-Seq(GSE36099)/Homer	RATGASTCAT	1e-69	-160.2	0	3849	0.0733	464.2	0.0341
Fra1(bZIP)/BT549-Fra1-ChIP-Seq(GSE46166)/Homer	NNATGASTCATH	1e-69	-160.1	0	3859	0.0735	466.6	0.0343
KAN2(G2like)/colamp-KAN2-DAP-Seq(GSE60143)/Homer	ATATTCTY	1e-68	-158	0	8180	0.1558	1343.3	0.0987
BATF(bZIP)/Th17-BATF-ChIP-Seq(GSE39756)/Homer	DATGASTCAT	1e-63	-146.7	0	4300	0.0819	570.6	0.0419
Zic(Zf)/Cerebellum-ZIC1.2-ChIP-Seq(GSE60731)/Homer	CCTGCTGAGH	1e-61	-140.5	0	8647	0.1647	1488	0.1093
Atf3(bZIP)/GBM-ATF3-ChIP-Seq(GSE33912)/Homer	DATGASTCATHN	1e-60	-139	0	4402	0.0839	603.3	0.0443
AP-1(bZIP)/ThioMac-PU.1-ChIP-Seq(GSE21512)/Homer	VTGACTCATC	1e-60	-138.5	0	4758	0.0906	674.9	0.0496
KLF14(Zf)/HEK293-KLF14.GFP-ChIP-Seq(GSE58341)/Homer	RGKGGGCGKGGC	1e-55	-128.5	0	17104	0.3259	3489.2	0.2564
AT2G38300(G2like)/col-AT2G38300-DAP-Seq(GSE60143)/Homer	ADRGAATGTT	1e-55	-127.6	0	8872	0.169	1572	0.1155
AT2G40260(G2like)/colamp-AT2G40260-DAP-Seq(GSE60143)/Homer	WAAAYATTCTTT	1e-53	-123.3	0	9910	0.1888	1816.8	0.1335
Bach2(bZIP)/OCILy7-Bach2-ChIP-Seq(GSE44420)/Homer	TGCTGAGTCA	1e-50	-115.4	0	1804	0.0344	165.4	0.0122
KLF5(Zf)/LoVo-KLF5-ChIP-Seq(GSE49402)/Homer	DGGGYGKGGC	1e-42	-96.73	0	13626	0.2596	2773.4	0.2038
BORIS(Zf)/K562-CTCFL-ChIP-Seq(GSE32465)/Homer	CNNBRGCGCCCCCTGSTGGC	1e-33	-78.13	0	4919	0.0937	840.9	0.0618
NFkB-p65(RHD)/GM12787-p65-ChIP-Seq(GSE19485)/Homer	WGGGGATTTCCC	1e-33	-77.76	0	4054	0.0772	657.3	0.0483
CTCF(Zf)/CD4+-CTCF-ChIP-Seq(Barski_et_al.)/Homer	AYAGTGCCMYCTRGTGGCCA	1e-32	-74.17	0	3884	0.074	630.4	0.0463
Maz(Zf)/HepG2-Maz-ChIP-Seq(GSE31477)/Homer	GGGGGGGG	1e-32	-73.9	0	13058	0.2488	2732.8	0.2008
Brn1(POU,Homeobox)/NPC-Brn1-ChIP-Seq(GSE35496)/Homer	TATGCWAATBAV	1e-31	-72.77	0	3353	0.0639	523.1	0.0384
Oct6(POU,Homeobox)/NPC-Pou3f1-ChIP-Seq(GSE35496)/Homer	WATGCAAATGAG	1e-30	-69.63	0	3655	0.0696	593.7	0.0436
Sp5(Zf)/mES-Sp5.Flag-ChIP-Seq(GSE72989)/Homer	RGKGGGCGGAGC	1e-29	-67.28	0	12006	0.2287	2509.6	0.1844
Oct4(POU,Homeobox)/mES-Oct4-ChIP-Seq(GSE11431)/Homer	ATTTGCATAW	1e-29	-67.05	0	3984	0.0759	669.7	0.0492
Tcf4(HMG)/Hct116-Tcf4-ChIP-Seq(SRA012054)/Homer	ASATCAAAGGVA	1e-28	-65.81	0	3743	0.0713	621.3	0.0456
Bach1(bZIP)/K562-Bach1-ChIP-Seq(GSE31477)/Homer	AWWNTGCTGAGTCAT	1e-26	-61.79	0	634	0.0121	39.9	0.0029
OCT4-SOX2-TCF-NANOG(POU,Homeobox,HMG)/mES-Oct4-ChIP-Seq(GSE11431)/Homer	ATTTGCATAACAATG	1e-26	-61.11	0	2679	0.051	411.7	0.0302
SeqBias: CG bias	SSSSSSSSSS	1e-25	-59.62	0	46029	0.8769	11457.3	0.8418
Nrf2(bZIP)/Lymphoblast-Nrf2-ChIP-Seq(GSE37589)/Homer	HTGCTGAGTCAT	1e-24	-57.29	0	615	0.0117	40	0.0029
At1g25550(G2like)/colamp-At1g25550-DAP-Seq(GSE60143)/Homer	NAGATTCY	1e-23	-55.02	0	6062	0.1155	1166	0.0857
Zfp281(Zf)/ES-Zfp281-ChIP-Seq(GSE81042)/Homer	CCCCTCCCCCAC	1e-23	-54.14	0	3350	0.0638	568.7	0.0418
Sox15(HMG)/CPA-Sox15-ChIP-Seq(GSE62909)/Homer	RAACAATGGN	1e-22	-51.27	0	6744	0.1285	1337.8	0.0983
Sox3(HMG)/NPC-Sox3-ChIP-Seq(GSE33059)/Homer	CCWTTGTY	1e-20	-48.35	0	11100	0.2115	2383.3	0.1751
AT1G49560(G2like)/colamp-AT1G49560-DAP-Seq(GSE60143)/Homer	GAWTCTNWDA	1e-20	-48.04	0	7138	0.136	1442.3	0.106
NF-E2(bZIP)/K562-NFE2-ChIP-Seq(GSE31477)/Homer	GATGACTCAGCA	1e-20	-47.02	0	685	0.0131	60.6	0.0045
Sox2(HMG)/mES-Sox2-ChIP-Seq(GSE11431)/Homer	BCCATTGTTC	1e-19	-45.97	0	6464	0.1231	1294.7	0.0951
SUT1?/SacCer-Promoters/Homer	CCCCGCGC	1e-19	-45.68	0	38416	0.7319	9416.4	0.6918
Foxh1(Forkhead)/hESC-FOXH1-ChIP-Seq(GSE29422)/Homer	NNTGTGGATTSS	1e-19	-45.22	0	3477	0.0662	621.6	0.0457
Atf7(bZIP)/3T3L1-Atf7-ChIP-Seq(GSE56872)/Homer	NGRTGACGTCAY	1e-19	-44.87	0	2589	0.0493	431.1	0.0317
KLF3(Zf)/MEF-Klf3-ChIP-Seq(GSE44748)/Homer	NRGCCCCRCCCHBNN	1e-19	-43.77	0	6677	0.1272	1353.4	0.0994
Tcf3(HMG)/mES-Tcf3-ChIP-Seq(GSE11724)/Homer	ASWTCAAAGG	1e-18	-42.85	0	2436	0.0464	404.1	0.0297
FOXA1(Forkhead)/LNCAP-FOXA1-ChIP-Seq(GSE27824)/Homer	WAAGTAAACA	1e-17	-41.3	0	5844	0.1113	1170.5	0.086
TCFL2(HMG)/K562-TCF7L2-ChIP-Seq(GSE29196)/Homer	ACWTCAAAGG	1e-17	-40.57	0	1107	0.0211	142.9	0.0105
FOXA1(Forkhead)/MCF7-FOXA1-ChIP-Seq(GSE26831)/Homer	WAAGTAAACA	1e-16	-39.06	0	4879	0.093	957.2	0.0703
At3g04030(G2like)/col-At3g04030-DAP-Seq(GSE60143)/Homer	DRGAATCT	1e-16	-38.36	0	5015	0.0955	991.9	0.0729
At3g12730(G2like)/colamp-At3g12730-DAP-Seq(GSE60143)/Homer	AAGATTCT	1e-16	-37.24	0	6944	0.1323	1446.6	0.1063
Atf2(bZIP)/3T3L1-Atf2-ChIP-Seq(GSE56872)/Homer	NRRTGACGTCAT	1e-15	-36.09	0	1939	0.0369	317.7	0.0233
NFkB-p65-Rel(RHD)/ThioMac-LPS-Expression(GSE23622)/Homer	GGAAATTCCC	1e-15	-35.94	0	720	0.0137	79.7	0.0059
AT4G37180(G2like)/col-AT4G37180-DAP-Seq(GSE60143)/Homer	AGAATCTTNN	1e-15	-35.02	0	6525	0.1243	1358.6	0.0998
Bcl6(Zf)/Liver-Bcl6-ChIP-Seq(GSE31578)/Homer	NNNCTTTCCAGGAAA	1e-14	-34.04	0	7908	0.1507	1692.8	0.1244
EKLF(Zf)/Erythrocyte-Klf1-ChIP-Seq(GSE20478)/Homer	NWGGGTGTGGCY	1e-14	-33.7	0	1776	0.0338	289.2	0.0212
Klf4(Zf)/mES-Klf4-ChIP-Seq(GSE11431)/Homer	GCCACACCCA	1e-14	-33.66	0	4172	0.0795	817.5	0.0601
c-Jun-CRE(bZIP)/K562-cJun-ChIP-Seq(GSE31477)/Homer	ATGACGTCATCY	1e-14	-33.32	0	1757	0.0335	286.1	0.021
Brn2(POU,Homeobox)/NPC-Brn2-ChIP-Seq(GSE35496)/Homer	ATGAATATTC	1e-13	-31.92	0	567	0.0108	58.1	0.0043
Foxa2(Forkhead)/Liver-Foxa2-ChIP-Seq(GSE25694)/Homer	CYTGTTTACWYW	1e-13	-30.42	0	4118	0.0785	818	0.0601
MYB92(MYB)/colamp-MYB92-DAP-Seq(GSE60143)/Homer	GGTAGGTR	1e-11	-27.49	0	4571	0.0871	936.3	0.0688
ERG(ETS)/VCaP-ERG-ChIP-Seq(GSE14097)/Homer	ACAGGAAGTG	1e-11	-27.21	0	10650	0.2029	2401.4	0.1764
FoxL2(Forkhead)/Ovary-FoxL2-ChIP-Seq(GSE60858)/Homer	WWTRTAAACAVG	1e-11	-27.15	0	3987	0.076	802.7	0.059
TGA1(bZIP)/colamp-TGA1-DAP-Seq(GSE60143)/Homer	TGACGTCAKC	1e-11	-26.83	0	2015	0.0384	359.6	0.0264
Atf1(bZIP)/K562-ATF1-ChIP-Seq(GSE31477)/Homer	GATGACGTCA	1e-11	-26.75	0	3247	0.0619	634.2	0.0466
Foxo3(Forkhead)/U2OS-Foxo3-ChIP-Seq(E-MTAB-2701)/Homer	DGTAAACA	1e-11	-26.6	0	3790	0.0722	759.6	0.0558
Foxf1(Forkhead)/Lung-Foxf1-ChIP-Seq(GSE77951)/Homer	WWATRTAAACAN	1e-11	-26.28	0	4349	0.0829	890.5	0.0654
Tbet(T-box)/CD8-Tbet-ChIP-Seq(GSE33802)/Homer	AGGTGTGAAM	1e-11	-25.96	0	5165	0.0984	1083.8	0.0796
OCT:OCT(POU,Homeobox,IR1)/NPC-Brn2-ChIP-Seq(GSE35496)/Homer	ATGAATWATTCATGA	1e-10	-24.99	0	267	0.0051	18.4	0.0014
KLF10(Zf)/HEK293-KLF10.GFP-ChIP-Seq(GSE58341)/Homer	GGGGGTGTGTCC	1e-10	-24.22	0	4694	0.0894	981.9	0.0721
SOL1(CPP)/colamp-SOL1-DAP-Seq(GSE60143)/Homer	ATTTAAATHN	1e-10	-23.7	0	5753	0.1096	1235.7	0.0908
Sox6(HMG)/Myotubes-Sox6-ChIP-Seq(GSE32627)/Homer	CCATTGTTNY	1e-10	-23.18	0	9062	0.1726	2040	0.1499
At5g18450(AP2EREBP)/col-At5g18450-DAP-Seq(GSE60143)/Homer	CACCGCTT	1e-09	-22.42	0	9865	0.1879	2244	0.1649
TGA6(bZIP)/colamp-TGA6-DAP-Seq(GSE60143)/Homer	TGACGTCABC	1e-09	-22.18	0	2629	0.0501	512.8	0.0377
Sox17(HMG)/Endoderm-Sox17-ChIP-Seq(GSE61475)/Homer	CCATTGTTYB	1e-09	-22.1	0	4714	0.0898	997.2	0.0733
NLP7(RWPRK)/col-NLP7-DAP-Seq(GSE60143)/Homer	TGRCCYTTCR	1e-09	-21.26	0	9861	0.1879	2251	0.1654
Klf9(Zf)/GBM-Klf9-ChIP-Seq(GSE62211)/Homer	GCCACRCCCACY	1e-09	-20.96	0	4881	0.093	1044	0.0767
SeqBias: GCW-triplet	GCWGCWGCWGCW	1e-08	-20.29	0	52472	0.9997	13582.7	0.998
RFX(HTH)/K562-RFX3-ChIP-Seq(SRA012198)/Homer	CGGTTGCCATGGCAAC	1e-08	-20.22	0	676	0.0129	96.6	0.0071
Rfx6(HTH)/Min6b1-Rfx6.HA-ChIP-Seq(GSE62844)/Homer	TGTTKCCTAGCAACM	1e-08	-20.18	0	6551	0.1248	1450	0.1065
ATHB33(ZFHD)/col-ATHB33-DAP-Seq(GSE60143)/Homer	NGTRATTAAK	1e-08	-20.16	0	5697	0.1085	1243.3	0.0913
Foxa3(Forkhead)/Liver-Foxa3-ChIP-Seq(GSE77670)/Homer	BSNTGTTTACWYWGN	1e-08	-20.14	0	1806	0.0344	335.5	0.0246
Sox10(HMG)/SciaticNerve-Sox3-ChIP-Seq(GSE35132)/Homer	CCWTTGTYYB	1e-08	-20.05	0	9599	0.1829	2196.8	0.1614
TCX2(CPP)/colamp-TCX2-DAP-Seq(GSE60143)/Homer	NNWWTTYRAAHN	1e-08	-19.67	0	5929	0.113	1302.4	0.0957
COUP-TFII(NR)/Artia-Nr2f2-ChIP-Seq(GSE46497)/Homer	AGRGGTCA	1e-08	-19.58	0	9130	0.1739	2084	0.1531
RUNX2(Runt)/PCa-RUNX2-ChIP-Seq(GSE33889)/Homer	NWAACCACADNN	1e-08	-19.36	0	4050	0.0772	855.2	0.0628
CTCF-SatelliteElement(Zf?)/CD4+-CTCF-ChIP-Seq(Barski_et_al.)/Homer	TGCAGTTCCMVNWRTGGCCA	1e-08	-19.34	0	302	0.0058	29.9	0.0022
Egr1(Zf)/K562-Egr1-ChIP-Seq(GSE32465)/Homer	TGCGTGGGYG	1e-08	-19.24	0	5123	0.0976	1111.5	0.0817
OCT:OCT-short(POU,Homeobox)/NPC-OCT6-ChIP-Seq(GSE43916)/Homer	ATGCATWATGCATRW	1e-08	-19.04	0	2414	0.046	476.9	0.035
JunD(bZIP)/K562-JunD-ChIP-Seq/Homer	ATGACGTCATCN	1e-08	-18.78	0	732	0.0139	110.7	0.0081
MYB116(MYB)/colamp-MYB116-DAP-Seq(GSE60143)/Homer	AGTTAGGCAN	1e-08	-18.65	0	3079	0.0587	631.1	0.0464
RUNX(Runt)/HPC7-Runx1-ChIP-Seq(GSE22178)/Homer	SAAACCACAG	1e-08	-18.61	0	3532	0.0673	737.7	0.0542
X-box(HTH)/NPC-H3K4me1-ChIP-Seq(GSE16256)/Homer	GGTTGCCATGGCAA	1e-08	-18.58	0	634	0.0121	91.9	0.0067
Rfx2(HTH)/LoVo-RFX2-ChIP-Seq(GSE49402)/Homer	GTTGCCATGGCAACM	1e-07	-18.41	0	723	0.0138	109.2	0.008
ETS1(ETS)/Jurkat-ETS1-ChIP-Seq(GSE17954)/Homer	ACAGGAAGTG	1e-07	-18.03	0	7620	0.1452	1725.2	0.1268
GATA3(Zf),DR8/iTreg-Gata3-ChIP-Seq(GSE20898)/Homer	AGATSTNDNNDSAGATAASN	1e-07	-18	0	322	0.0061	34.6	0.0025
FOXP1(Forkhead)/H9-FOXP1-ChIP-Seq(GSE31006)/Homer	NYYTGTTTACHN	1e-07	-17.92	0	2275	0.0433	449.1	0.033
Tbr1(T-box)/Cortex-Tbr1-ChIP-Seq(GSE71384)/Homer	AAGGTGTKAA	1e-07	-17.64	0	6708	0.1278	1505.8	0.1106
Stat3(Stat)/mES-Stat3-ChIP-Seq(GSE11431)/Homer	CTTCCGGGAA	1e-07	-17.46	0	3629	0.0691	766.6	0.0563
TGA4(bZIP)/colamp-TGA4-DAP-Seq(GSE60143)/Homer	RTGACGTCAKCW	1e-07	-17.41	0	1451	0.0276	266.7	0.0196
AT3G57600(AP2EREBP)/col-AT3G57600-DAP-Seq(GSE60143)/Homer	GGCGGTGG	1e-07	-17.33	0	5620	0.1071	1243.7	0.0914
SeqBias: GA-repeat	GAGAGAGAGA	1e-07	-17.31	0	34507	0.6574	8608.5	0.6325
SeqBias: CA-repeat	CACACACACA	1e-07	-17.28	0	26934	0.5131	6629.9	0.4871
AT2G20110(CPP)/colamp-AT2G20110-DAP-Seq(GSE60143)/Homer	ATTYAAATHY	1e-07	-17.14	0	5726	0.1091	1270.9	0.0934
TF3A(C2H2)/col-TF3A-DAP-Seq(GSE60143)/Homer	NNDDGAGGAGGWNNN	1e-07	-17.05	0	7495	0.1428	1702.3	0.1251
Etv2(ETS)/ES-ER71-ChIP-Seq(GSE59402)/Homer(0.967)	NNAYTTCCTGHN	1e-07	-16.92	0	6559	0.125	1474.1	0.1083
SeqBias: C/A-bias	MMMMMMMMMM	1e-07	-16.92	0	52450	0.9993	13573.8	0.9973
Atf4(bZIP)/MEF-Atf4-ChIP-Seq(GSE35681)/Homer	MTGATGCAAT	1e-07	-16.7	0	1207	0.023	215.1	0.0158
TGA5(bZIP)/col-TGA5-DAP-Seq(GSE60143)/Homer	NNGATGACGTCATCN	1e-07	-16.68	0	714	0.0136	111.2	0.0082
TGA10(bZIP)/colamp-TGA10-DAP-Seq(GSE60143)/Homer	ATGACGTC	1e-07	-16.6	0	2359	0.0449	474.9	0.0349
ATHB24(ZFHD)/colamp-ATHB24-DAP-Seq(GSE60143)/Homer	TAATTAAS	1e-07	-16.57	0	3532	0.0673	748.1	0.055
Foxo1(Forkhead)/RAW-Foxo1-ChIP-Seq(Fan_et_al.)/Homer	CTGTTTAC	1e-07	-16.17	0	10025	0.191	2335.9	0.1716
FOXK2(Forkhead)/U2OS-FOXK2-ChIP-Seq(E-MTAB-2204)/Homer	SCHTGTTTACAT	1e-06	-15.63	0	3425	0.0653	728.1	0.0535
MYB93(MYB)/colamp-MYB93-DAP-Seq(GSE60143)/Homer	GGTAGGTGRD	1e-06	-15.56	0	4866	0.0927	1073.6	0.0789
At3g60580(C2H2)/col-At3g60580-DAP-Seq(GSE60143)/Homer	WTTYTACT	1e-06	-15.53	0	25629	0.4883	6312.5	0.4638
Tcf12(bHLH)/GM12878-Tcf12-ChIP-Seq(GSE32465)/Homer	VCAGCTGYTG	1e-06	-15.49	0	6559	0.125	1485.7	0.1092
CHR(?)/Hela-CellCycle-Expression/Homer	SRGTTTCAAA	1e-06	-15.48	0	2449	0.0467	500.7	0.0368
MYB30(MYB)/colamp-MYB30-DAP-Seq(GSE60143)/Homer	AGGTAGTTGG	1e-06	-15.4	0	4928	0.0939	1089.8	0.0801
RUNX-AML(Runt)/CD4+-PolII-ChIP-Seq(Barski_et_al.)/Homer	GCTGTGGTTW	1e-06	-15.36	0	3334	0.0635	708.5	0.0521
Zelda(Zf)/Embryo-zld-ChIP-Seq(GSE65441)/Homer	KBCTACCTGW	1e-06	-15	0	2931	0.0558	615.5	0.0452
MYB51(MYB)/col-MYB51-DAP-Seq(GSE60143)/Homer	GGTAGGTG	1e-06	-14.97	0	3867	0.0737	837.1	0.0615
bZIP50(bZIP)/colamp-bZIP50-DAP-Seq(GSE60143)/Homer	GATGACGTCA	1e-06	-14.91	0	3924	0.0748	851.6	0.0626
Lhx2(Homeobox)/HFSC-Lhx2-ChIP-Seq(GSE48068)/Homer	TAATTAGN	1e-06	-14.85	0	5061	0.0964	1125.3	0.0827
SPDEF(ETS)/VCaP-SPDEF-ChIP-Seq(SRA014231)/Homer	ASWTCCTGBT	1e-06	-14.68	0	6928	0.132	1582.9	0.1163
At1g68670(G2like)/colamp-At1g68670-DAP-Seq(GSE60143)/Homer	WNWWHNRAAGATTCT	1e-06	-14.56	0	1831	0.0349	362.2	0.0266
Rfx5(HTH)/GM12878-Rfx5-ChIP-Seq(GSE31477)/Homer	SCCTAGCAACAG	1e-06	-14.48	0	2013	0.0384	404.5	0.0297
Nanog(Homeobox)/mES-Nanog-ChIP-Seq(GSE11724)/Homer	RGCCATTAAC	1e-06	-14.09	0	20808	0.3964	5088.2	0.3738
PHA-4(Forkhead)/cElegans-Embryos-PHA4-ChIP-Seq(modEncode)/Homer	KTGTTTGC	1e-06	-14	0	14246	0.2714	3417.5	0.2511
MYB3(MYB)/Arabidopsis-MYB3-ChIP-Seq(GSE80564)/Homer	GKTAGGTRGG	1e-06	-13.98	0	8607	0.164	2003.8	0.1472
At3g24120(G2like)/col-At3g24120-DAP-Seq(GSE60143)/Homer	NWWAGMATMW	1e-06	-13.93	0	14768	0.2814	3550.4	0.2609
At2g01060(G2like)/colamp-At2g01060-DAP-Seq(GSE60143)/Homer	AGATKCBNWW	1e-06	-13.91	0	13870	0.2642	3323.6	0.2442
p53(p53)/Saos-p53-ChIP-Seq(GSE15780)/Homer	RRCATGYCYRGRCATGYYYN	1e-06	-13.91	0	485	0.0092	72	0.0053
p53(p53)/Saos-p53-ChIP-Seq/Homer	RRCATGYCYRGRCATGYYYN	1e-06	-13.91	0	485	0.0092	72	0.0053
CRE(bZIP)/Promoter/Homer	CSGTGACGTCAC	1e-06	-13.83	0	1558	0.0297	303.6	0.0223
TSO1(CPP)/col-TSO1-DAP-Seq(GSE60143)/Homer	RAATTTRAAW	1e-05	-13.74	0	568	0.0108	88.5	0.0065
FOXK1(Forkhead)/HEK293-FOXK1-ChIP-Seq(GSE51673)/Homer	NVWTGTTTAC	1e-05	-13.61	0	4892	0.0932	1093.3	0.0803
Tbox:Smad(T-box,MAD)/ESCd5-Smad2_3-ChIP-Seq(GSE29422)/Homer	AGGTGHCAGACA	1e-05	-13.58	0	978	0.0186	175.7	0.0129
MYB57(MYB)/col-MYB57-DAP-Seq(GSE60143)/Homer	TTACCTAACT	1e-05	-13.52	0	1907	0.0363	384.8	0.0283
Gata6(Zf)/HUG1N-GATA6-ChIP-Seq(GSE51936)/Homer	YCTTATCTBN	1e-05	-13.38	0	4091	0.0779	901.1	0.0662
MYB94(MYB)/col-MYB94-DAP-Seq(GSE60143)/Homer	WGGTRGTTGGKA	1e-05	-13.21	0	1827	0.0348	367.6	0.027
Fox:Ebox(Forkhead,bHLH)/Panc1-Foxa2-ChIP-Seq(GSE47459)/Homer	NNNVCTGWGYAAACASN	1e-05	-13.17	0	4594	0.0875	1024.1	0.0752
GATA3(Zf)/iTreg-Gata3-ChIP-Seq(GSE20898)/Homer	AGATAASR	1e-05	-13.14	0	6497	0.1238	1489.1	0.1094
GATA4(C2C2gata)/col-GATA4-DAP-Seq(GSE60143)/Homer	DDWTYAGATCTR	1e-05	-12.91	0	2814	0.0536	599.1	0.044
Oct2(POU,Homeobox)/Bcell-Oct2-ChIP-Seq(GSE21512)/Homer	ATATGCAAAT	1e-05	-12.86	0	2277	0.0434	473	0.0348
EBF(EBF)/proBcell-EBF-ChIP-Seq(GSE21978)/Homer	DGTCCCYRGGGA	1e-05	-12.85	0	1430	0.0272	278.4	0.0205
MYB13(MYB)/col-MYB13-DAP-Seq(GSE60143)/Homer	HYCACCWACCHH	1e-05	-12.81	0	2875	0.0548	614.3	0.0451
Sox4(HMG)/proB-Sox4-ChIP-Seq(GSE50066)/Homer	YCTTTGTTCC	1e-05	-12.63	0	4989	0.095	1124.3	0.0826
Smad2(MAD)/ES-SMAD2-ChIP-Seq(GSE29422)/Homer	CTGTCTGG	1e-05	-12.51	0	9320	0.1776	2195.3	0.1613
Pitx1(Homeobox)/Chicken-Pitx1-ChIP-Seq(GSE38910)/Homer	TAATCCCN	1e-05	-12.4	0	22227	0.4235	5475.3	0.4023
Gata2(Zf)/K562-GATA2-ChIP-Seq(GSE18829)/Homer	BBCTTATCTS	1e-05	-12.36	0	3011	0.0574	649	0.0477
CEBP:AP1(bZIP)/ThioMac-CEBPb-ChIP-Seq(GSE21512)/Homer	DRTGTTGCAA	1e-05	-12.33	0	3333	0.0635	726.8	0.0534
ATHB23(ZFHD)/col-ATHB23-DAP-Seq(GSE60143)/Homer	HTAATTARNN	1e-05	-11.72	0	3968	0.0756	883.5	0.0649
FOXM1(Forkhead)/MCF7-FOXM1-ChIP-Seq(GSE72977)/Homer	TRTTTACTTW	1e-05	-11.68	0.0001	4622	0.0881	1042.1	0.0766
EBF1(EBF)/Near-E2A-ChIP-Seq(GSE21512)/Homer	GTCCCCWGGGGA	0.0001	-11.31	0.0001	7053	0.1344	1643.5	0.1208
MYB107(MYB)/col-MYB107-DAP-Seq(GSE60143)/Homer	RGTWGGTRRR	0.0001	-11.23	0.0001	7066	0.1346	1647.9	0.1211
Smad4(MAD)/ESC-SMAD4-ChIP-Seq(GSE29422)/Homer	VBSYGTCTGG	0.0001	-11.22	0.0001	9381	0.1787	2224.8	0.1635
Ap4(bHLH)/AML-Tfap4-ChIP-Seq(GSE45738)/Homer	NAHCAGCTGD	0.0001	-10.96	0.0001	7309	0.1392	1710.4	0.1257
HY5(bZIP)/colamp-HY5-DAP-Seq(GSE60143)/Homer	RRTSACGTSD	0.0001	-10.89	0.0001	3164	0.0603	695.1	0.0511
MYB58(MYB)/colamp-MYB58-DAP-Seq(GSE60143)/Homer	YYYACCWACC	0.0001	-10.89	0.0001	3819	0.0728	853.4	0.0627
Gata4(Zf)/Heart-Gata4-ChIP-Seq(GSE35151)/Homer	NBWGATAAGR	0.0001	-10.86	0.0001	4464	0.085	1010.2	0.0742
Otx2(Homeobox)/EpiLC-Otx2-ChIP-Seq(GSE56098)/Homer	NYTAATCCYB	0.0001	-10.82	0.0001	4093	0.078	920.3	0.0676
MYB17(MYB)/colamp-MYB17-DAP-Seq(GSE60143)/Homer	GGTAGGTGRG	0.0001	-10.67	0.0001	2757	0.0525	599.2	0.044
FEA4(bZIP)/Corn-FEA4-ChIP-Seq(GSE61954)/Homer	TGACGTCACS	0.0001	-10.66	0.0001	5213	0.0993	1195.5	0.0878
TGA3(bZIP)/colamp-TGA3-DAP-Seq(GSE60143)/Homer	WTGATGACGTCATCW	0.0001	-10.59	0.0001	488	0.0093	79.9	0.0059
AT5G45580(G2like)/colamp-AT5G45580-DAP-Seq(GSE60143)/Homer	ADRGAATCTH	0.0001	-10.47	0.0002	7104	0.1353	1664.4	0.1223
GATA12(C2C2gata)/col-GATA12-DAP-Seq(GSE60143)/Homer	YAGATCTRAW	0.0001	-10.15	0.0002	2332	0.0444	502	0.0369
PU.1(ETS)/ThioMac-PU.1-ChIP-Seq(GSE21512)/Homer	AGAGGAAGTG	0.0001	-10.05	0.0002	3057	0.0582	675.3	0.0496
Lhx1(Homeobox)/EmbryoCarcinoma-Lhx1-ChIP-Seq(GSE70957)/Homer	NNYTAATTAR	0.0001	-10.05	0.0002	5187	0.0988	1194.5	0.0878
SeqBias: G/A bias	RRRRRRRRRR	0.0001	-10.05	0.0002	52458	0.9994	13585.1	0.9981
MYB121(MYB)/col-MYB121-DAP-Seq(GSE60143)/Homer	YNTACCTAACWW	0.0001	-9.887	0.0003	1309	0.0249	263.3	0.0193
ATHB34(ZFHD)/colamp-ATHB34-DAP-Seq(GSE60143)/Homer	TRATTARS	0.0001	-9.792	0.0003	3624	0.069	814.4	0.0598
CRF4(AP2EREBP)/colamp-CRF4-DAP-Seq(GSE60143)/Homer	CGCCGCCA	0.0001	-9.68	0.0003	4624	0.0881	1059.7	0.0779
Lhx3(Homeobox)/Neuron-Lhx3-ChIP-Seq(GSE31456)/Homer	ADBTAATTAR	0.0001	-9.556	0.0004	7547	0.1438	1784.9	0.1311
AMYB(HTH)/Testes-AMYB-ChIP-Seq(GSE44588)/Homer	TGGCAGTTGG	0.0001	-9.511	0.0004	7541	0.1437	1783.5	0.131
Replumless(BLH)/Arabidopsis-RPL.GFP-ChIP-Seq(GSE78727)/Homer	HGTCWHATCA	0.0001	-9.422	0.0004	4129	0.0787	940.8	0.0691
MYB73(MYB)/col-MYB73-DAP-Seq(GSE60143)/Homer	NNNNHAACNGHHDHN	0.0001	-9.411	0.0004	7276	0.1386	1718.1	0.1262
Nur77(NR)/K562-NR4A1-ChIP-Seq(GSE31363)/Homer	TGACCTTTNCNT	0.0001	-9.366	0.0004	890	0.017	170.5	0.0125
TATA-Box(TBP)/Promoter/Homer	CCTTTTAWAGSC	0.0001	-9.359	0.0004	5821	0.1109	1357.2	0.0997
Gata1(Zf)/K562-GATA1-ChIP-Seq(GSE18829)/Homer	SAGATAAGRV	0.0001	-9.3	0.0005	2711	0.0516	597	0.0439
At5g04390(C2H2)/col200-At5g04390-DAP-Seq(GSE60143)/Homer	AGTGANDN	0.0001	-9.252	0.0005	27662	0.527	6928.9	0.5091
AT3G10580(MYBrelated)/colamp-AT3G10580-DAP-Seq(GSE60143)/Homer	TACCTAACWNHW	0.0001	-9.244	0.0005	1589	0.0303	331.6	0.0244
Stat3+il21(Stat)/CD4-Stat3-ChIP-Seq(GSE19198)/Homer	SVYTTCCNGGAARB	0.0001	-9.232	0.0005	4245	0.0809	970.7	0.0713
Twist(bHLH)/HMLE-TWIST1-ChIP-Seq(Chang_et_al)/Homer	VCAKCTGGNNNCCAGMTGBN	0.0001	-9.228	0.0005	843	0.0161	160.1	0.0118
Tlx?(NR)/NPC-H3K4me1-ChIP-Seq(GSE16256)/Homer	CTGGCAGSCTGCCA	0.0001	-9.22	0.0005	2312	0.044	502.9	0.037
MYB99(MYB)/colamp-MYB99-DAP-Seq(GSE60143)/Homer	GGTAGGTG	0.001	-9.158	0.0005	3776	0.0719	856.5	0.0629
Initiator/Drosophila-Promoters/Homer	NTCAGTYG	0.001	-9.141	0.0005	10555	0.2011	2544	0.1869
EWS:FLI1-fusion(ETS)/SK_N_MC-EWS:FLI1-ChIP-Seq(SRA014231)/Homer	VACAGGAAAT	0.001	-9.109	0.0005	4208	0.0802	962.3	0.0707
REST-NRSF(Zf)/Jurkat-NRSF-ChIP-Seq/Homer	GGMGCTGTCCATGGTGCTGA	0.001	-8.864	0.0007	177	0.0034	21.8	0.0016
GATA(Zf),IR3/iTreg-Gata3-ChIP-Seq(GSE20898)/Homer	NNNNNBAGATAWYATCTVHN	0.001	-8.667	0.0008	469	0.0089	80.1	0.0059
HOXA9(Homeobox)/HSC-Hoxa9-ChIP-Seq(GSE33509)/Homer	GGCCATAAATCA	0.001	-8.588	0.0009	2228	0.0424	486.5	0.0357
ARF2(ARF)/col-ARF2-DAP-Seq(GSE60143)/Homer	TTGTCGGMWN	0.001	-8.38	0.0011	15424	0.2939	3791.8	0.2786
CDX4(Homeobox)/ZebrafishEmbryos-Cdx4.Myc-ChIP-Seq(GSE48254)/Homer	NGYCATAAAWCH	0.001	-8.28	0.0012	3028	0.0577	681.1	0.05
M1BP(Zf)/S2R+-M1BP-ChIP-Seq(GSE49842)/Homer	CAGTGTGACCGT	0.001	-8.217	0.0013	901	0.0172	177.7	0.0131
p73(p53)/Trachea-p73-ChIP-Seq(PRJNA310161)/Homer	NRRRCAWGTCCDGRCATGYY	0.001	-8.215	0.0013	315	0.006	49.9	0.0037
MYB55(MYB)/colamp-MYB55-DAP-Seq(GSE60143)/Homer	YACCWAMC	0.001	-8.167	0.0013	4580	0.0873	1062.7	0.0781
PU.1:IRF8(ETS:IRF)/pDC-Irf8-ChIP-Seq(GSE66899)/Homer	GGAAGTGAAAST	0.001	-8.117	0.0014	833	0.0159	162.8	0.012
Brachyury(T-box)/Mesoendoderm-Brachyury-ChIP-exo(GSE54963)/Homer	ANTTMRCASBNNNGTGYKAAN	0.001	-8.088	0.0014	1854	0.0353	400.9	0.0295
Reverb(NR),DR2/RAW-Reverba.biotin-ChIP-Seq(GSE45914)/Homer	GTRGGTCASTGGGTCA	0.001	-8.002	0.0016	639	0.0122	119.1	0.0088
KLF6(Zf)/PDAC-KLF6-ChIP-Seq(GSE64557)/Homer	MKGGGYGTGGCC	0.001	-7.98	0.0016	11516	0.2194	2803.1	0.2059
HSF6(HSF)/col-HSF6-DAP-Seq(GSE60143)/Homer	TTYTAGAAGCTTCTA	0.001	-7.921	0.0017	1031	0.0196	208.5	0.0153
dof42(C2C2dof)/col-dof42-DAP-Seq(GSE60143)/Homer	AAAAAGGC	0.001	-7.883	0.0017	2834	0.054	637.6	0.0468
Pit1+1bp(Homeobox)/GCrat-Pit1-ChIP-Seq(GSE58009)/Homer	ATGCATAATTCA	0.001	-7.86	0.0018	1250	0.0238	259	0.019
Cdx2(Homeobox)/mES-Cdx2-ChIP-Seq(GSE14586)/Homer	GYMATAAAAH	0.001	-7.859	0.0018	2291	0.0436	506.4	0.0372
p53(p53)/mES-cMyc-ChIP-Seq(GSE11431)/Homer	ACATGCCCGGGCAT	0.001	-7.857	0.0018	190	0.0036	25.2	0.0019
ZNF467(Zf)/HEK293-ZNF467.GFP-ChIP-Seq(GSE58341)/Homer	TGGGGAAGGGCM	0.001	-7.843	0.0018	7044	0.1342	1678.2	0.1233
STAT5(Stat)/mCD4+-Stat5-ChIP-Seq(GSE12346)/Homer	RTTTCTNAGAAA	0.001	-7.799	0.0018	1989	0.0379	434.8	0.0319
Tbx20(T-box)/Heart-Tbx20-ChIP-Seq(GSE29636)/Homer	GGTGYTGACAGS	0.001	-7.745	0.0019	1140	0.0217	234.6	0.0172
GABPA(ETS)/Jurkat-GABPa-ChIP-Seq(GSE17954)/Homer	RACCGGAAGT	0.001	-7.687	0.002	7312	0.1393	1747.5	0.1284
ELF3(ETS)/PDAC-ELF3-ChIP-Seq(GSE64557)/Homer	ANCAGGAAGT	0.001	-7.625	0.0022	4599	0.0876	1072.8	0.0788
Zfp809(Zf)/ES-Zfp809-ChIP-Seq(GSE70799)/Homer	GGGGCTYGKCTGGGA	0.001	-7.589	0.0022	1321	0.0252	277	0.0204
Sp1(Zf)/Promoter/Homer	GGCCCCGCCCCC	0.001	-7.586	0.0022	4650	0.0886	1085.7	0.0798
DREB19(AP2EREBP)/colamp-DREB19-DAP-Seq(GSE60143)/Homer	AATGTCGGTK	0.001	-7.585	0.0022	2100	0.04	462.8	0.034
TGA9(bZIP)/colamp-TGA9-DAP-Seq(GSE60143)/Homer	VTGACGTC	0.001	-7.486	0.0024	4472	0.0852	1042.9	0.0766
MYB61(MYB)/colamp-MYB61-DAP-Seq(GSE60143)/Homer	HCYACCTACC	0.001	-7.485	0.0024	6391	0.1218	1519.8	0.1117
GATA1(C2C2gata)/colamp-GATA1-DAP-Seq(GSE60143)/Homer	DDWWYYAGATCTRRW	0.001	-7.422	0.0026	1415	0.027	301	0.0221
BMYB(HTH)/Hela-BMYB-ChIP-Seq(GSE27030)/Homer	NHAACBGYYV	0.001	-7.413	0.0026	7075	0.1348	1691.9	0.1243
AP-2gamma(AP2)/MCF7-TFAP2C-ChIP-Seq(GSE21234)/Homer	SCCTSAGGSCAW	0.001	-7.388	0.0026	7608	0.1449	1825	0.1341
MYB88(MYB)/col-MYB88-DAP-Seq(GSE60143)/Homer	HNACGCTCCT	0.001	-7.379	0.0027	13420	0.2557	3296.3	0.2422
STAT4(Stat)/CD4-Stat4-ChIP-Seq(GSE22104)/Homer	NYTTCCWGGAAR	0.001	-7.36	0.0027	5024	0.0957	1180.2	0.0867
ANAC013(NAC)/col-ANAC013-DAP-Seq(GSE60143)/Homer	CTTGNNNNNCAAGNA	0.001	-7.344	0.0027	1519	0.0289	325.3	0.0239
ESE1(AP2EREBP)/col-ESE1-DAP-Seq(GSE60143)/Homer	GGCGGCGG	0.001	-7.319	0.0028	6219	0.1185	1478.6	0.1086
SF1(NR)/H295R-Nr5a1-ChIP-Seq(GSE44220)/Homer	CAAGGHCANV	0.001	-7.31	0.0028	2279	0.0434	507.1	0.0373
Unknown1(NR/Ini-like)/Drosophila-Promoters/Homer	MYGGTCACACTG	0.001	-7.282	0.0029	774	0.0147	152.9	0.0112
STZ(C2H2)/colamp-STZ-DAP-Seq(GSE60143)/Homer	HNBTCACT	0.001	-7.282	0.0029	28541	0.5438	7191.7	0.5284
GATA(Zf),IR4/iTreg-Gata3-ChIP-Seq(GSE20898)/Homer	NAGATWNBNATCTNN	0.001	-7.279	0.0029	338	0.0064	56.1	0.0041
AZF1(C2H2)/colamp-AZF1-DAP-Seq(GSE60143)/Homer	DKSWCACT	0.001	-7.265	0.0029	27219	0.5186	6848.1	0.5031
Unknown4/Drosophila-Promoters/Homer	AAAAATACCRMA	0.001	-7.258	0.0029	385	0.0073	66.1	0.0049
FUS3(ABI3VP1)/col-FUS3-DAP-Seq(GSE60143)/Homer	DNNWTNTGCATGKNN	0.001	-7.205	0.003	3999	0.0762	928.2	0.0682
EHF(ETS)/LoVo-EHF-ChIP-Seq(GSE49402)/Homer	AVCAGGAAGT	0.001	-7.026	0.0036	8380	0.1597	2024.4	0.1487
caudal(Homeobox)/Drosophila-Embryos-ChIP-Chip(modEncode)/Homer	GGYCATAAAW	0.001	-7.003	0.0037	2723	0.0519	617.3	0.0454
At1g49010(MYBrelated)/col-At1g49010-DAP-Seq(GSE60143)/Homer	RGATAASNTT	0.001	-7.002	0.0037	7584	0.1445	1824.6	0.1341
MYB67(MYB)/col-MYB67-DAP-Seq(GSE60143)/Homer	YYYACCTAAC	0.001	-6.986	0.0037	3751	0.0715	869.8	0.0639
Pit1(Homeobox)/GCrat-Pit1-ChIP-Seq(GSE58009)/Homer	ATGMATATDC	0.001	-6.939	0.0039	3607	0.0687	834	0.0613
STAT1(Stat)/HelaS3-STAT1-ChIP-Seq(GSE12782)/Homer	NATTTCCNGGAAAT	0.01	-6.762	0.0046	1835	0.035	404.5	0.0297
EWS:ERG-fusion(ETS)/CADO_ES1-EWS:ERG-ChIP-Seq(SRA014231)/Homer	ATTTCCTGTN	0.01	-6.687	0.0049	3873	0.0738	902.3	0.0663
DREB2(AP2EREBP)/col-DREB2-DAP-Seq(GSE60143)/Homer	TMACCGACATWA	0.01	-6.618	0.0052	1618	0.0308	353.5	0.026
MYB70(MYB)/col-MYB70-DAP-Seq(GSE60143)/Homer	WTAACNGTTA	0.01	-6.451	0.0062	5789	0.1103	1381.3	0.1015
c-Myc(bHLH)/mES-cMyc-ChIP-Seq(GSE11431)/Homer	VVCCACGTGG	0.01	-6.412	0.0064	2543	0.0484	578.8	0.0425
GSC(Homeobox)/FrogEmbryos-GSC-ChIP-Seq(DRA000576)/Homer	RGGATTAR	0.01	-6.39	0.0065	5766	0.1099	1376.3	0.1011
ERF73(AP2EREBP)/col-ERF73-DAP-Seq(GSE60143)/Homer	CCGCCGCC	0.01	-6.39	0.0065	5750	0.1095	1372.4	0.1008
TFE3(bHLH)/MEF-TFE3-ChIP-Seq(GSE75757)/Homer	GTCACGTGACYV	0.01	-6.288	0.0071	562	0.0107	108.2	0.008
ZNF519(Zf)/HEK293-ZNF519.GFP-ChIP-Seq(GSE58341)/Homer	GAGSCCGAGC	0.01	-6.245	0.0074	1637	0.0312	360.5	0.0265
GFY-Staf(?,Zf)/Promoter/Homer	RACTACAATTCCCAGAAKGC	0.01	-6.166	0.008	727	0.0139	146.2	0.0107
ZNF165(Zf)/WHIM12-ZNF165-ChIP-Seq(GSE65937)/Homer	AAGGKGRCGCAGGCA	0.01	-6.125	0.0083	761	0.0145	154.2	0.0113
NF1(CTF)/LNCAP-NF1-ChIP-Seq(Unpublished)/Homer	CYTGGCABNSTGCCAR	0.01	-6.085	0.0086	1894	0.0361	423.2	0.0311
GATA11(C2C2gata)/col-GATA11-DAP-Seq(GSE60143)/Homer	DDHYYAGATCTR	0.01	-6.067	0.0087	1711	0.0326	379.9	0.0279
Znf263(Zf)/K562-Znf263-ChIP-Seq(GSE31477)/Homer	CVGTSCTCCC	0.01	-6.04	0.0089	11451	0.2182	2817.9	0.207
ISRE(IRF)/ThioMac-LPS-Expression(GSE23622)/Homer	AGTTTCASTTTC	0.01	-6.037	0.0089	313	0.006	54	0.004
NeuroD1(bHLH)/Islet-NeuroD1-ChIP-Seq(GSE30298)/Homer	GCCATCTGTT	0.01	-6.02	0.009	4803	0.0915	1140.7	0.0838
NAC2(NAC)/colamp-NAC2-DAP-Seq(GSE60143)/Homer	TDCTTGNNNNNCAAG	0.01	-5.947	0.0097	2359	0.0449	537.2	0.0395
Oct4:Sox17(POU,Homeobox,HMG)/F9-Sox17-ChIP-Seq(GSE44553)/Homer	CCATTGTATGCAAAT	0.01	-5.926	0.0098	547	0.0104	106.3	0.0078
ABF1(bZIP)/Arabidopsis-ABF1-ChIP-Seq(GSE80564)/Homer	CACGTGGC	0.01	-5.922	0.0098	4236	0.0807	1000.4	0.0735
MYB77(MYB)/col-MYB77-DAP-Seq(GSE60143)/Homer	NYAACBGYMC	0.01	-5.913	0.0099	5718	0.1089	1370.4	0.1007
HRE(HSF)/HepG2-HSF1-ChIP-Seq(GSE31477)/Homer	BSTTCTRGAABVTTCYAGAA	0.01	-5.842	0.0106	833	0.0159	172.6	0.0127
LOB(LOBAS2)/col-LOB-DAP-Seq(GSE60143)/Homer	CGCCGKAWWTTHCGS	0.01	-5.808	0.0109	1533	0.0292	338.8	0.0249
At5g65130(AP2EREBP)/colamp-At5g65130-DAP-Seq(GSE60143)/Homer	CCRCCGACAWTN	0.01	-5.73	0.0117	1301	0.0248	283.8	0.0208
E2F4(E2F)/K562-E2F4-ChIP-Seq(GSE31477)/Homer	GGCGGGAAAH	0.01	-5.704	0.012	3872	0.0738	912.9	0.0671
At1g36060(AP2EREBP)/colamp-At1g36060-DAP-Seq(GSE60143)/Homer	NNWWKGTCGGTG	0.01	-5.595	0.0133	2404	0.0458	551.1	0.0405
n-Myc(bHLH)/mES-nMyc-ChIP-Seq(GSE11431)/Homer	VRCCACGTGG	0.01	-5.583	0.0134	3649	0.0695	858.1	0.063
ZNF143|STAF(Zf)/CUTLL-ZNF143-ChIP-Seq(GSE29600)/Homer	ATTTCCCAGVAKSCY	0.01	-5.528	0.0142	2577	0.0491	594.8	0.0437
CEJ1(AP2EREBP)/col-CEJ1-DAP-Seq(GSE60143)/Homer	WWTGTCGGTG	0.01	-5.517	0.0143	3513	0.0669	825.9	0.0607
GRHL2(CP2)/HBE-GRHL2-ChIP-Seq(GSE46194)/Homer	AAACYKGTTWDACMRGTTTB	0.01	-5.49	0.0146	2714	0.0517	628.7	0.0462
MYB10(MYB)/col-MYB10-DAP-Seq(GSE60143)/Homer	YCCACCTACCHH	0.01	-5.487	0.0146	1673	0.0319	374.4	0.0275
Tcf21(bHLH)/ArterySmoothMuscle-Tcf21-ChIP-Seq(GSE61369)/Homer	NAACAGCTGG	0.01	-5.476	0.0147	5719	0.109	1376.9	0.1012
Unknown3/Arabidopsis-Promoters/Homer	AYTAAACCGG	0.01	-5.443	0.0151	730	0.0139	150.9	0.0111
LBD23(LOBAS2)/colamp-LBD23-DAP-Seq(GSE60143)/Homer	GCGNAWWWTNCGCYW	0.01	-5.393	0.0158	5272	0.1004	1265.9	0.093
MS188(MYB)/colamp-MS188-DAP-Seq(GSE60143)/Homer	WARKTAGGTRRA	0.01	-5.37	0.0161	2624	0.05	607	0.0446
LIN-39(Homeobox)/cElegans.L3-LIN39-ChIP-Seq(modEncode)/Homer	ATGATTRATG	0.01	-5.326	0.0168	3686	0.0702	870.5	0.064
ANAC046(NAC)/colamp-ANAC046-DAP-Seq(GSE60143)/Homer	ACACGYWAYC	0.01	-5.293	0.0173	7499	0.1429	1827.9	0.1343
ZNF675(Zf)/HEK293-ZNF675.GFP-ChIP-Seq(GSE58341)/Homer	ARGAGGMCAAAATGW	0.01	-5.167	0.0195	538	0.0102	107.9	0.0079
Esrrb(NR)/mES-Esrrb-ChIP-Seq(GSE11431)/Homer	KTGACCTTGA	0.01	-5.109	0.0206	3112	0.0593	730.7	0.0537
ERF11(AP2EREBP)/col-ERF11-DAP-Seq(GSE60143)/Homer	RTGGCGGCGG	0.01	-5.108	0.0206	5675	0.1081	1370.5	0.1007
Nr5a2(NR)/Pancreas-LRH1-ChIP-Seq(GSE34295)/Homer	BTCAAGGTCA	0.01	-5.085	0.021	3490	0.0665	824.1	0.0605
NF1:FOXA1(CTF,Forkhead)/LNCAP-FOXA1-ChIP-Seq(GSE27824)/Homer	WNTGTTTRYTTTGGCA	0.01	-5.045	0.0218	163	0.0031	25.2	0.0019
Arnt:Ahr(bHLH)/MCF7-Arnt-ChIP-Seq(Lo_et_al.)/Homer	TBGCACGCAA	0.01	-4.992	0.0229	3228	0.0615	760.4	0.0559
DREB26(AP2EREBP)/col-DREB26-DAP-Seq(GSE60143)/Homer	CCACCGACAH	0.01	-4.927	0.0243	961	0.0183	207.6	0.0153
Unknown6/Drosophila-Promoters/Homer	AATTTTAAAA	0.01	-4.916	0.0245	2517	0.048	585.6	0.043
ERF3(AP2EREBP)/colamp-ERF3-DAP-Seq(GSE60143)/Homer	ATGGCGGCGG	0.01	-4.91	0.0245	4632	0.0882	1111.8	0.0817
TR4(NR),DR1/Hela-TR4-ChIP-Seq(GSE24685)/Homer	GAGGTCAAAGGTCA	0.01	-4.874	0.0253	563	0.0107	114.1	0.0084
MYB96(MYB)/colamp-MYB96-DAP-Seq(GSE60143)/Homer	WGGTRGTTGG	0.01	-4.828	0.0265	4084	0.0778	975.8	0.0717
Egr2(Zf)/Thymocytes-Egr2-ChIP-Seq(GSE34254)/Homer	NGCGTGGGCGGR	0.01	-4.821	0.0265	1450	0.0276	325.3	0.0239
VND1(NAC)/col-VND1-DAP-Seq(GSE60143)/Homer	CTTRWDNHWYAAGYW	0.01	-4.81	0.0267	2602	0.0496	607.2	0.0446
ZSCAN22(Zf)/HEK293-ZSCAN22.GFP-ChIP-Seq(GSE58341)/Homer	SMCAGTCWGAKGGAGGAGGC	0.01	-4.772	0.0277	399	0.0076	77.5	0.0057
MYB39(MYB)/col-MYB39-DAP-Seq(GSE60143)/Homer	WWAARKTAGGTGRAA	0.01	-4.764	0.0278	500	0.0095	100.3	0.0074
GATA14(C2C2gata)/col-GATA14-DAP-Seq(GSE60143)/Homer	AYCAGATCTG	0.01	-4.76	0.0278	2778	0.0529	651.4	0.0479
ERE(NR),IR3/MCF7-ERa-ChIP-Seq(Unpublished)/Homer	VAGGTCACNSTGACC	0.01	-4.755	0.0278	1245	0.0237	276.8	0.0203
AT5G25475(ABI3VP1)/col-AT5G25475-DAP-Seq(GSE60143)/Homer	RNNRNCAAGCADNDB	0.01	-4.751	0.0279	6238	0.1188	1517.7	0.1115
CRF10(AP2EREBP)/col100-CRF10-DAP-Seq(GSE60143)/Homer	DCCGCCGYHA	0.01	-4.683	0.0297	8060	0.1536	1979.8	0.1455
Ronin(THAP)/ES-Thap11-ChIP-Seq(GSE51522)/Homer	RACTACAACTCCCAGVAKGC	0.01	-4.669	0.03	546	0.0104	111.5	0.0082
AP-2alpha(AP2)/Hela-AP2alpha-ChIP-Seq(GSE31477)/Homer	ATGCCCTGAGGC	0.1	-4.578	0.0328	5839	0.1112	1419.2	0.1043
Pho4(bHLH)/Yeast-Pho4-ChIP-Seq(GSE29506)/Homer	AAGCACGTGBGD	0.1	-4.547	0.0337	922	0.0176	200.4	0.0147
Dorsal(RHD)/Embryo-dl-ChIP-Seq(GSE65441)/Homer	GGGAAAAMCCCG	0.1	-4.544	0.0337	1160	0.0221	257.7	0.0189
Mef2d(MADS)/Retina-Mef2d-ChIP-Seq(GSE61391)/Homer	GCTATTTTTAGC	0.1	-4.531	0.034	513	0.0098	104.5	0.0077
At1g13300(G2like)/col-At1g13300-DAP-Seq(GSE60143)/Homer	GAATCTWAGATTCYN	0.1	-4.518	0.0343	35	0.0007	2.5	0.0002
HAT2(Homeobox)/colamp-HAT2-DAP-Seq(GSE60143)/Homer	CYAATSATTR	0.1	-4.518	0.0343	2594	0.0494	608.5	0.0447
ANAC071(NAC)/col-ANAC071-DAP-Seq(GSE60143)/Homer	DNCKTNDNNNHNAAG	0.1	-4.462	0.0361	2733	0.0521	643.9	0.0473
CArG(MADS)/PUER-Srf-ChIP-Seq(Sullivan_et_al.)/Homer	CCATATATGGNM	0.1	-4.452	0.0363	1323	0.0252	297.7	0.0219
Sox9(HMG)/Limb-SOX9-ChIP-Seq(GSE73225)/Homer	AGGVNCCTTTGT	0.1	-4.447	0.0364	5041	0.096	1220.8	0.0897
AGL95(ND)/col-AGL95-DAP-Seq(GSE60143)/Homer	TTCTAGAAGCTTCTA	0.1	-4.393	0.0383	480	0.0091	97.7	0.0072
MYB63(MYB)/col-MYB63-DAP-Seq(GSE60143)/Homer	BHYACCWACCHH	0.1	-4.39	0.0383	1895	0.0361	437.2	0.0321
WRKY11(WRKY)/col-WRKY11-DAP-Seq(GSE60143)/Homer	SCGTTGACTTTN	0.1	-4.346	0.0398	383	0.0073	75.5	0.0055
GATA6(C2C2gata)/col200-GATA6-DAP-Seq(GSE60143)/Homer	TAGATCTARAHH	0.1	-4.342	0.0399	466	0.0089	94.1	0.0069
AGL15(MADS)/col-AGL15-DAP-Seq(GSE60143)/Homer	TTTCCHWATWDGGAA	0.1	-4.236	0.0442	464	0.0088	94.8	0.007
WIP5(C2H2)/colamp-WIP5-DAP-Seq(GSE60143)/Homer	TDTTCTCMAGGT	0.1	-4.234	0.0442	6269	0.1194	1533.9	0.1127
OCT:OCT(POU,Homeobox)/NPC-Brn1-ChIP-Seq(GSE35496)/Homer	ATGAATATTCATGAG	0.1	-4.23	0.0442	46	0.0009	4.8	0.0004
RBFox2(?)/Heart-RBFox2-CLIP-Seq(GSE57926)/Homer	TGCATGCA	0.1	-4.137	0.0483	9087	0.1731	2250	0.1653
WRKY46(WRKY)/colamp-WRKY46-DAP-Seq(GSE60143)/Homer	AAAGTCAACGSN	0.1	-4.133	0.0483	172	0.0033	29.1	0.0021
ERF1(AP2EREBP)/colamp-ERF1-DAP-Seq(GSE60143)/Homer	GGCGGCTR	0.1	-4.125	0.0486	5165	0.0984	1256.7	0.0923
ERF2(AP2EREBP)/colamp-ERF2-DAP-Seq(GSE60143)/Homer	GGCGGCTG	0.1	-4.085	0.0503	5753	0.1096	1405.7	0.1033
BIM3(bHLH)/col-BIM3-DAP-Seq(GSE60143)/Homer	TWVTCACGTGAB	0.1	-4.082	0.0504	700	0.0133	150.8	0.0111
Prop1(Homeobox)/GHFT1-PROP1.biotin-ChIP-Seq(GSE77302)/Homer	NTAATBNAATTA	0.1	-4.068	0.0509	1712	0.0326	395.7	0.0291
Ets1-distal(ETS)/CD4+-PolII-ChIP-Seq(Barski_et_al.)/Homer	MACAGGAAGT	0.1	-4.053	0.0515	1687	0.0321	389.7	0.0286
SVP(MADS)/col-SVP-DAP-Seq(GSE60143)/Homer	ANTTWCCHAATTTGG	0.1	-4.038	0.0521	1662	0.0317	383.8	0.0282
DEAR5(AP2EREBP)/col-DEAR5-DAP-Seq(GSE60143)/Homer	NDWTGTCGGTGRWDN	0.1	-4.029	0.0524	460	0.0088	95	0.007
Pax8(Paired,Homeobox)/Thyroid-Pax8-ChIP-Seq(GSE26938)/Homer	GTCATGCHTGRCTGS	0.1	-4.013	0.0531	1767	0.0337	409.2	0.0301
LBD18(LOBAS2)/colamp-LBD18-DAP-Seq(GSE60143)/Homer	CKGAWWTTCHGS	0.1	-4.004	0.0534	12596	0.24	3149.4	0.2314
ERF10(AP2EREBP)/col-ERF10-DAP-Seq(GSE60143)/Homer	RTGGCGGCGG	0.1	-3.975	0.0548	4902	0.0934	1192.7	0.0876
ANAC038(NAC)/col-ANAC038-DAP-Seq(GSE60143)/Homer	ACACGTWAYC	0.1	-3.969	0.0549	8312	0.1584	2056.9	0.1511
AtHB32(ZFHD)/col200-AtHB32-DAP-Seq(GSE60143)/Homer	CGAATTAT	0.1	-3.945	0.0561	3946	0.0752	952.5	0.07
VND2(NAC)/col-VND2-DAP-Seq(GSE60143)/Homer	DNCKTNNNNNNNAAG	0.1	-3.942	0.0561	3135	0.0597	749.5	0.0551
ANAC028(NAC)/col-ANAC028-DAP-Seq(GSE60143)/Homer	WRCTTGNNNNNCAAG	0.1	-3.927	0.0567	2379	0.0453	561.5	0.0413
PPARE(NR),DR1/3T3L1-Pparg-ChIP-Seq(GSE13511)/Homer	TGACCTTTGCCCCA	0.1	-3.907	0.0577	4632	0.0882	1125.1	0.0827
Rbpj1(?)/Panc1-Rbpj1-ChIP-Seq(GSE47459)/Homer	HTTTCCCASG	0.1	-3.89	0.0585	7905	0.1506	1954.8	0.1436
Usf2(bHLH)/C2C12-Usf2-ChIP-Seq(GSE36030)/Homer	GTCACGTGGT	0.1	-3.885	0.0586	1579	0.0301	364.5	0.0268
OBP3(C2C2dof)/col-OBP3-DAP-Seq(GSE60143)/Homer	NYWACTTTTT	0.1	-3.875	0.0591	13825	0.2634	3467.9	0.2548
MYB40(MYB)/col-MYB40-DAP-Seq(GSE60143)/Homer	TGGTAGGTRARA	0.1	-3.863	0.0596	1378	0.0263	315.1	0.0231
GATA19(C2C2gata)/colamp-GATA19-DAP-Seq(GSE60143)/Homer	ATCSGATCVG	0.1	-3.85	0.0602	210	0.004	38.7	0.0028
AT1G44830(AP2EREBP)/col-AT1G44830-DAP-Seq(GSE60143)/Homer	NCCACCGACA	0.1	-3.85	0.0602	1234	0.0235	280	0.0206
ANAC016(NAC)/col-ANAC016-DAP-Seq(GSE60143)/Homer	WNCTTGNNNNNCAMG	0.1	-3.842	0.0603	3114	0.0593	745.9	0.0548
STAT6(Stat)/CD4-Stat6-ChIP-Seq(GSE22104)/Homer	ABTTCYYRRGAA	0.1	-3.786	0.0636	2594	0.0494	616.9	0.0453
dHNF4(NR)/Fly-HNF4-ChIP-Seq(GSE73675)/Homer	GGTCCAAAGTCCAMT	0.1	-3.783	0.0636	177	0.0034	31.6	0.0023
WRKY55(WRKY)/col-WRKY55-DAP-Seq(GSE60143)/Homer	NCGTTGACTT	0.1	-3.781	0.0636	3905	0.0744	944.8	0.0694
HuR(?)/HEK293-HuR-CLIP-Seq(GSE87887)/Homer	BTTTGGTTTG	0.1	-3.742	0.0658	15732	0.2997	3960.3	0.291
AT1G76870(Trihelix)/col-AT1G76870-DAP-Seq(GSE60143)/Homer	AAAACCRGWW	0.1	-3.707	0.068	1808	0.0344	422.3	0.031
E2F6(E2F)/Hela-E2F6-ChIP-Seq(GSE31477)/Homer	GGCGGGAARN	0.1	-3.688	0.069	4337	0.0826	1054.1	0.0774
bHLH74(bHLH)/col-bHLH74-DAP-Seq(GSE60143)/Homer	DRATCACGTGAB	0.1	-3.686	0.069	1376	0.0262	316.9	0.0233
LEP(AP2EREBP)/col-LEP-DAP-Seq(GSE60143)/Homer	CDCCGCCGTC	0.1	-3.654	0.071	2652	0.0505	632.8	0.0465
SHN3(AP2EREBP)/col-SHN3-DAP-Seq(GSE60143)/Homer	CCGCCGCC	0.1	-3.571	0.0769	3507	0.0668	847.1	0.0622
MYB81(MYB)/col-MYB81-DAP-Seq(GSE60143)/Homer	NWAACSGWTWNN	0.1	-3.562	0.0774	5667	0.108	1392.4	0.1023
Mef2c(MADS)/GM12878-Mef2c-ChIP-Seq(GSE32465)/Homer	DCYAAAAATAGM	0.1	-3.531	0.0796	1203	0.0229	275.8	0.0203
AT5G23930(mTERF)/col-AT5G23930-DAP-Seq(GSE60143)/Homer	GGCGGCTG	0.1	-3.53	0.0796	12225	0.2329	3065.2	0.2252
ANAC017(NAC)/colamp-ANAC017-DAP-Seq(GSE60143)/Homer	TMCTTGNNNNNCAAG	0.1	-3.524	0.0797	437	0.0083	91.3	0.0067
GATA:SCL(Zf,bHLH)/Ter119-SCL-ChIP-Seq(GSE18720)/Homer	CRGCTGBNGNSNNSAGATAA	0.1	-3.505	0.081	492	0.0094	104.5	0.0077
LBD13(LOBAS2)/colamp-LBD13-DAP-Seq(GSE60143)/Homer	KCCGTNWTTTBCGGC	0.1	-3.479	0.0829	5037	0.096	1234.7	0.0907
SeqBias: CG-repeat	CGCGCGCGCG	0.1	-3.461	0.0841	13505	0.2573	3395.6	0.2495
NST1(NAC)/colamp-NST1-DAP-Seq(GSE60143)/Homer	WRCTTRWWNWWYAAG	0.1	-3.453	0.0846	3030	0.0577	729.3	0.0536
AT2G28810(C2C2dof)/colamp-AT2G28810-DAP-Seq(GSE60143)/Homer	VAAAAAGTWA	0.1	-3.441	0.0853	10299	0.1962	2574.2	0.1891
TGA2(bZIP)/colamp-TGA2-DAP-Seq(GSE60143)/Homer	ACGTCAYCHH	0.1	-3.385	0.0901	2262	0.0431	538.3	0.0396
ATAF1(NAC)/col-ATAF1-DAP-Seq(GSE60143)/Homer	YACGTMAY	0.1	-3.371	0.0911	9749	0.1857	2435.1	0.1789
PAX5(Paired,Homeobox),condensed/GM12878-PAX5-ChIP-Seq(GSE32465)/Homer	GTCACGCTCSCTGM	0.1	-3.354	0.0924	686	0.0131	151.9	0.0112
PIF7(bHLH)/col-PIF7-DAP-Seq(GSE60143)/Homer	CCACGTGGNH	0.1	-3.336	0.0937	1008	0.0192	229.5	0.0169
RAP26(AP2EREBP)/colamp-RAP26-DAP-Seq(GSE60143)/Homer	HDATGGCGGCGG	0.1	-3.306	0.0963	7392	0.1408	1835.4	0.1349
At1g77640(AP2EREBP)/col-At1g77640-DAP-Seq(GSE60143)/Homer	TGTCGGTGGA	0.1	-3.305	0.0963	643	0.0123	141.5	0.0104
VND4(NAC)/colamp-VND4-DAP-Seq(GSE60143)/Homer	WRCTTGWANWWCAAG	0.1	-3.291	0.0972	2450	0.0467	586.1	0.0431
E2F7(E2F)/Hela-E2F7-ChIP-Seq(GSE32673)/Homer	VDTTTCCCGCCA	0.1	-3.283	0.0977	1035	0.0197	236.2	0.0174
At1g22810(AP2EREBP)/colamp-At1g22810-DAP-Seq(GSE60143)/Homer	BCACCGACANNN	0.1	-3.254	0.1004	1401	0.0267	326.1	0.024
CBF1(AP2EREBP)/colamp-CBF1-DAP-Seq(GSE60143)/Homer	YRCCGACATN	0.1	-3.233	0.1021	2315	0.0441	553.3	0.0406
Unknown3/Drosophila-Promoters/Homer	ACVAKCTGGCAGCGC	0.1	-3.229	0.1023	452	0.0086	96.5	0.0071
PABPC1(?)/MEL-PABC1-CLIP-Seq(GSE69755)/Homer	HAATAAAGNN	0.1	-3.207	0.1042	6382	0.1216	1580.1	0.1161
Rfx1(HTH)/NPC-H3K4me1-ChIP-Seq(GSE16256)/Homer	KGTTGCCATGGCAA	0.1	-3.194	0.1053	1171	0.0223	270.1	0.0198
At1g75490(AP2EREBP)/colamp-At1g75490-DAP-Seq(GSE60143)/Homer	CACCGMCT	0.1	-3.187	0.1058	8672	0.1652	2164.3	0.159
HNF1b(Homeobox)/PDAC-HNF1B-ChIP-Seq(GSE64557)/Homer	GTTAATNATTAA	0.1	-3.161	0.1082	374	0.0071	78.5	0.0058
Smad3(MAD)/NPC-Smad3-ChIP-Seq(GSE36673)/Homer	TWGTCTGV	0.1	-3.143	0.1099	18034	0.3436	4569.5	0.3357
GLI3(Zf)/Limb-GLI3-ChIP-Chip(GSE11077)/Homer	CGTGGGTGGTCC	0.1	-3.139	0.11	597	0.0114	131.3	0.0096
ERF7(AP2EREBP)/col-ERF7-DAP-Seq(GSE60143)/Homer	ATGRCGGCGG	0.1	-3.124	0.1114	7981	0.1521	1989.6	0.1462
HIF-1a(bHLH)/MCF7-HIF1a-ChIP-Seq(GSE28352)/Homer	TACGTGCV	0.1	-3.115	0.112	1054	0.0201	242.2	0.0178
NPAS(bHLH)/Liver-NPAS-ChIP-Seq(GSE39860)/Homer	NVCACGTG	0.1	-3.084	0.1153	6565	0.1251	1630	0.1198
ATHB25(ZFHD)/colamp-ATHB25-DAP-Seq(GSE60143)/Homer	TAATTAVB	0.1	-3.082	0.1153	4777	0.091	1175.6	0.0864
MYB118(MYB)/colamp-MYB118-DAP-Seq(GSE60143)/Homer	TAWCCGTTAC	0.1	-3.074	0.1159	979	0.0187	224.2	0.0165
AT3G58630(Trihelix)/col-AT3G58630-DAP-Seq(GSE60143)/Homer	TCTCCGGCGA	0.1	-3.054	0.1179	921	0.0175	210.4	0.0155
PU.1-IRF(ETS:IRF)/Bcell-PU.1-ChIP-Seq(GSE21512)/Homer	MGGAAGTGAAAC	0.1	-3.053	0.1179	6366	0.1213	1579	0.116
NAM(NAC)/col-NAM-DAP-Seq(GSE60143)/Homer	RGTTRCGTRW	0.1	-3.047	0.118	3984	0.0759	975.3	0.0717
Fli1(ETS)/CD8-FLI-ChIP-Seq(GSE20898)/Homer	NRYTTCCGGH	0.1	-3.047	0.118	8953	0.1706	2239	0.1645
Pitx1:Ebox(Homeobox,bHLH)/Hindlimb-Pitx1-ChIP-Seq(GSE41591)/Homer	YTAATTRAWWCCAGATGT	0.1	-3.044	0.118	557	0.0106	122.2	0.009
ZNF317(Zf)/HEK293-ZNF317.GFP-ChIP-Seq(GSE58341)/Homer	GTCWGCTGTYYCTCT	0.1	-3.04	0.118	303	0.0058	62.7	0.0046
Nr5a2(NR)/mES-Nr5a2-ChIP-Seq(GSE19019)/Homer	BTCAAGGTCA	0.1	-3.038	0.118	2593	0.0494	625.7	0.046
Nkx6.1(Homeobox)/Islet-Nkx6.1-ChIP-Seq(GSE40975)/Homer	GKTAATGR	0.1	-3.023	0.1194	10986	0.2093	2760.5	0.2028
ERF5(AP2EREBP)/colamp-ERF5-DAP-Seq(GSE60143)/Homer	DCMGCCGCCA	0.1	-3.02	0.1194	3709	0.0707	906.2	0.0666
SeqBias: polyC-repeat	CCCCCCCCCC	0.1	-2.996	0.122	52371	0.9978	13568.9	0.9969
AT5G63260(C3H)/col-AT5G63260-DAP-Seq(GSE60143)/Homer	RAAAAAGTRA	0.1	-2.972	0.1245	10220	0.1947	2565.4	0.1885
FRS9(ND)/col-FRS9-DAP-Seq(GSE60143)/Homer	RGAGAGAGAAAG	0.1	-2.966	0.125	1406	0.0268	330.7	0.0243
WRKY65(WRKY)/colamp-WRKY65-DAP-Seq(GSE60143)/Homer	AWWWAGTCAACG	0.1	-2.929	0.1294	1457	0.0278	343.8	0.0253
Hoxc9(Homeobox)/Ainv15-Hoxc9-ChIP-Seq(GSE21812)/Homer	GGCCATAAATCA	0.1	-2.921	0.13	1493	0.0284	352.2	0.0259
ZNF136(Zf)/HEK293-ZNF136.GFP-ChIP-Seq(GSE58341)/Homer	YTKGATAHAGTATTCTWGGTNGGCA	0.1	-2.897	0.1329	343	0.0065	72.3	0.0053
At2g33710(AP2EREBP)/colamp-At2g33710-DAP-Seq(GSE60143)/Homer	WTKGCGGCKR	0.1	-2.896	0.1329	10907	0.2078	2743.4	0.2016
CDM1(C3H)/colamp-CDM1-DAP-Seq(GSE60143)/Homer	CCGAWAWTWTCGGAN	0.1	-2.896	0.1329	360	0.0069	76.1	0.0056
WRKY8(WRKY)/colamp-WRKY8-DAP-Seq(GSE60143)/Homer	CGTTGACTTT	0.1	-2.876	0.1346	317	0.006	66.8	0.0049
Knotted(Homeobox)/Corn-KN1-ChIP-Seq(GSE39161)/Homer	GAYGNGACRGGN	0.1	-2.872	0.1349	6634	0.1264	1651.2	0.1213
Gfi1b(Zf)/HPC7-Gfi1b-ChIP-Seq(GSE22178)/Homer	MAATCACTGC	0.1	-2.86	0.1361	2854	0.0544	693.1	0.0509
AT3G12130(C3H)/colamp-AT3G12130-DAP-Seq(GSE60143)/Homer	TMACTTTTTV	0.1	-2.842	0.1382	10648	0.2029	2678.8	0.1968
CBF4(AP2EREBP)/colamp-CBF4-DAP-Seq(GSE60143)/Homer	NRCCGACDWNNNNNN	0.1	-2.833	0.1391	2255	0.043	543.8	0.04
ZNF189(Zf)/HEK293-ZNF189.GFP-ChIP-Seq(GSE58341)/Homer	TGGAACAGMA	0.1	-2.816	0.1411	4411	0.084	1087.2	0.0799
AARE(HLH)/mES-cMyc-ChIP-Seq/Homer	GATTGCATCA	0.1	-2.788	0.1448	328	0.0062	70	0.0051
PR(NR)/T47D-PR-ChIP-Seq(GSE31130)/Homer	VAGRACAKNCTGTBC	0.1	-2.77	0.147	9833	0.1873	2471.3	0.1816
E-box/Drosophila-Promoters/Homer	AACAGCTGTTHN	0.1	-2.758	0.1484	1151	0.0219	269.7	0.0198
ELF1(ETS)/Jurkat-ELF1-ChIP-Seq(SRA014231)/Homer	AVCCGGAAGT	0.1	-2.755	0.1484	5340	0.1017	1324.4	0.0973
SPL14(SBP)/col-SPL14-DAP-Seq(GSE60143)/Homer	NNWHTGTACGGAHNH	0.1	-2.752	0.1485	462	0.0088	101.9	0.0075
Chop(bZIP)/MEF-Chop-ChIP-Seq(GSE35681)/Homer	ATTGCATCAT	0.1	-2.748	0.1487	735	0.014	167.3	0.0123
OCT:OCT(POU,Homeobox)/NPC-OCT6-ChIP-Seq(GSE43916)/Homer	YATGCATATRCATRT	0.1	-2.734	0.1504	237	0.0045	48	0.0035
ANAC053(NAC)/colamp-ANAC053-DAP-Seq(GSE60143)/Homer	TDCTTGNNNNNCAAG	0.1	-2.731	0.1505	1758	0.0335	420.8	0.0309
BIM1(bHLH)/colamp-BIM1-DAP-Seq(GSE60143)/Homer	NNNNNNVTCACGTGM	0.1	-2.663	0.1608	576	0.011	129.2	0.0095
MYB27(MYB)/colamp-MYB27-DAP-Seq(GSE60143)/Homer	TACCTAACWT	0.1	-2.63	0.1658	542	0.0103	121.1	0.0089
HIF2a(bHLH)/785_O-HIF2a-ChIP-Seq(GSE34871)/Homer	GCACGTACCC	0.1	-2.569	0.1757	1313	0.025	311.2	0.0229
AT5G05550(Trihelix)/col-AT5G05550-DAP-Seq(GSE60143)/Homer	HDNHDTCKCCGGMGA	0.1	-2.568	0.1757	7946	0.1514	1993.8	0.1465
MYB83(MYB)/colamp-MYB83-DAP-Seq(GSE60143)/Homer	CACCAACCWH	0.1	-2.562	0.1761	7081	0.1349	1772.1	0.1302
At4g31060(AP2EREBP)/colamp-At4g31060-DAP-Seq(GSE60143)/Homer	CACCGACAAW	0.1	-2.553	0.1772	1139	0.0217	268.6	0.0197
HLF(bZIP)/HSC-HLF.Flag-ChIP-Seq(GSE69817)/Homer	RTTATGYAAB	0.1	-2.546	0.1781	2871	0.0547	702.5	0.0516
GFY(?)/Promoter/Homer	ACTACAATTCCC	0.1	-2.525	0.1813	683	0.013	156.2	0.0115
AT1G01250(AP2EREBP)/col-AT1G01250-DAP-Seq(GSE60143)/Homer	YCACCGACAHTW	0.1	-2.524	0.1813	216	0.0041	44.6	0.0033
IRF:BATF(IRF:bZIP)/pDC-Irf8-ChIP-Seq(GSE66899)/Homer	CTTTCANTATGACTV	0.1	-2.498	0.1854	389	0.0074	85.1	0.0063
MYB101(MYB)/colamp-MYB101-DAP-Seq(GSE60143)/Homer	TAACNRMY	0.1	-2.482	0.188	9066	0.1727	2283	0.1677
AT1G19040(NAC)/col-AT1G19040-DAP-Seq(GSE60143)/Homer	CTTGNDNHNCAAGYW	0.1	-2.437	0.1961	425	0.0081	94.6	0.007
ERF104(AP2EREBP)/col-ERF104-DAP-Seq(GSE60143)/Homer	GGCGGCGG	0.1	-2.409	0.2013	7223	0.1376	1812.6	0.1332
ANAC070(NAC)/colamp-ANAC070-DAP-Seq(GSE60143)/Homer	CTTRHDNHNBAAGHW	0.1	-2.407	0.2013	3798	0.0724	939.5	0.069
PBX1(Homeobox)/MCF7-PBX1-ChIP-Seq(GSE28007)/Homer	GSCTGTCACTCA	0.1	-2.386	0.2049	432	0.0082	96.7	0.0071
Pbx3(Homeobox)/GM12878-PBX3-ChIP-Seq(GSE32465)/Homer	SCTGTCAMTCAN	0.1	-2.36	0.2098	1107	0.0211	262.7	0.0193
WRKY14(WRKY)/colamp-WRKY14-DAP-Seq(GSE60143)/Homer	NCGTTGACTTTN	0.1	-2.335	0.2146	1527	0.0291	367.1	0.027
AT4G18450(AP2EREBP)/col-AT4G18450-DAP-Seq(GSE60143)/Homer	ATGGCGGCKG	0.1	-2.313	0.2189	3401	0.0648	840.3	0.0617
AT4G26030(C2H2)/col-AT4G26030-DAP-Seq(GSE60143)/Homer	BYYACCWACY	0.1	-2.312	0.2189	3917	0.0746	971.9	0.0714
AGL25(MADS)/colamp-AGL25-DAP-Seq(GSE60143)/Homer	TTTCCATWTWTGGAA	1	-2.291	0.2227	134	0.0026	26.9	0.002
WRKY21(WRKY)/colamp-WRKY21-DAP-Seq(GSE60143)/Homer	DCGTTGACTTTT	1	-2.285	0.2235	292	0.0056	63.6	0.0047
TINY(AP2EREBP)/col-TINY-DAP-Seq(GSE60143)/Homer	NNCACCGACA	1	-2.283	0.2235	720	0.0137	168	0.0123
ABR1(AP2EREBP)/colamp-ABR1-DAP-Seq(GSE60143)/Homer	AAATGGCGGCGG	1	-2.271	0.2255	5915	0.1127	1481.1	0.1088
AT3G60490(AP2EREBP)/colamp-AT3G60490-DAP-Seq(GSE60143)/Homer	NNRCCGACANNNNNN	1	-2.251	0.2296	800	0.0152	187.9	0.0138
At2g44940(AP2EREBP)/colamp-At2g44940-DAP-Seq(GSE60143)/Homer	NYACCGACAHNNNNN	1	-2.247	0.23	568	0.0108	130.6	0.0096
MYB49(MYB)/col-MYB49-DAP-Seq(GSE60143)/Homer	ARKTAGGTRR	1	-2.241	0.2306	3947	0.0752	980.7	0.0721
Unknown1/Arabidopsis-Promoters/Homer	RGGGTAWWWTHGTAA	1	-2.211	0.2372	282	0.0054	61.5	0.0045
Hand2(bHLH)/Mesoderm-Hand2-ChIP-Seq(GSE61475)/Homer	TGACANARRCCAGRC	1	-2.198	0.2397	2299	0.0438	563.6	0.0414
GRE(NR),IR3/RAW264.7-GRE-ChIP-Seq(Unpublished)/Homer	VAGRACAKWCTGTYC	1	-2.17	0.2461	793	0.0151	186.3	0.0137
Isl1(Homeobox)/Neuron-Isl1-ChIP-Seq(GSE31456)/Homer	CTAATKGV	1	-2.167	0.2461	9289	0.177	2348.2	0.1725
MITF(bHLH)/MastCells-MITF-ChIP-Seq(GSE48085)/Homer	RTCATGTGAC	1	-2.16	0.2472	4459	0.085	1113	0.0818
Phox2a(Homeobox)/Neuron-Phox2a-ChIP-Seq(GSE31456)/Homer	YTAATYNRATTA	1	-2.152	0.2488	1030	0.0196	245.6	0.018
AT5G66940(C2C2dof)/col-AT5G66940-DAP-Seq(GSE60143)/Homer	NNHACTTTWT	1	-2.132	0.2532	7882	0.1502	1988	0.1461
WRKY42(WRKY)/colamp-WRKY42-DAP-Seq(GSE60143)/Homer	NAAAGTCAACGN	1	-2.122	0.2551	1125	0.0214	269.6	0.0198
ANAC050(NAC)/colamp-ANAC050-DAP-Seq(GSE60143)/Homer	WNCTTGNNNNNCAAG	1	-2.113	0.2568	1842	0.0351	449.2	0.033
HRE(HSF)/Striatum-HSF1-ChIP-Seq(GSE38000)/Homer	TTCTAGAABNTTCTA	1	-2.109	0.2573	980	0.0187	233.3	0.0171
IRF2(IRF)/Erythroblas-IRF2-ChIP-Seq(GSE36985)/Homer	GAAASYGAAASY	1	-2.103	0.2581	535	0.0102	123.5	0.0091
bZIP28(bZIP)/col-bZIP28-DAP-Seq(GSE60143)/Homer	TGCCACGTSABH	1	-2.083	0.2628	995	0.019	237.9	0.0175
ETS:E-box(ETS,bHLH)/HPC7-Scl-ChIP-Seq(GSE22178)/Homer	AGGAARCAGCTG	1	-2.073	0.2647	481	0.0092	110.4	0.0081
TATA-box/Drosophila-Promoters/Homer	CTATAAAAGCSV	1	-2.071	0.2648	308	0.0059	68.4	0.005
WRKY26(WRKY)/colamp-WRKY26-DAP-Seq(GSE60143)/Homer	CGTTGACTWDKN	1	-2.053	0.269	1656	0.0315	403.4	0.0296
Pdx1(Homeobox)/Islet-Pdx1-ChIP-Seq(SRA008281)/Homer	YCATYAATCA	1	-2.029	0.2748	3329	0.0634	827.2	0.0608
GATA3(Zf),DR4/iTreg-Gata3-ChIP-Seq(GSE20898)/Homer	AGATGKDGAGATAAG	1	-2.022	0.2763	236	0.0045	51.9	0.0038
Mef2a(MADS)/HL1-Mef2a.biotin-ChIP-Seq(GSE21529)/Homer	CYAAAAATAG	1	-2.02	0.2763	1539	0.0293	375	0.0276
AT3G09735(S1Falike)/col-AT3G09735-DAP-Seq(GSE60143)/Homer	TTCTAGAANMTTCTA	1	-2	0.2812	1784	0.034	436.9	0.0321
WRKY71(WRKY)/col-WRKY71-DAP-Seq(GSE60143)/Homer	CKTTGACYWW	1	-1.997	0.2813	2393	0.0456	590.6	0.0434
AGL16(MADS)/col-AGL16-DAP-Seq(GSE60143)/Homer	TWCCHWATWDGGAAA	1	-1.97	0.2884	289	0.0055	64.4	0.0047
WRKY18(WRKY)/col-WRKY18-DAP-Seq(GSE60143)/Homer	NNNTTGACYWNNNNN	1	-1.968	0.2884	5796	0.1104	1458.6	0.1072
DDF1(AP2EREBP)/col-DDF1-DAP-Seq(GSE60143)/Homer	GCCGACAT	1	-1.949	0.2931	1189	0.0227	287.6	0.0211
SGR5(C2H2)/colamp-SGR5-DAP-Seq(GSE60143)/Homer	TTTGTCTTTTTT	1	-1.933	0.2972	2893	0.0551	718.3	0.0528
VND3(NAC)/colamp-VND3-DAP-Seq(GSE60143)/Homer	TRCTTGWDNHWCAAG	1	-1.93	0.2973	2211	0.0421	545.7	0.0401
SRS7(SRS)/colamp-SRS7-DAP-Seq(GSE60143)/Homer	HATAGGTTTH	1	-1.914	0.3016	18106	0.3449	4629.4	0.3401
ANAC079(NAC)/colamp-ANAC079-DAP-Seq(GSE60143)/Homer	TACACGCAACCT	1	-1.911	0.3019	1227	0.0234	297.2	0.0218
Hoxb4(Homeobox)/ES-Hoxb4-ChIP-Seq(GSE34014)/Homer	TGATTRATGGCY	1	-1.895	0.306	690	0.0131	163.8	0.012
WRKY27(WRKY)/colamp-WRKY27-DAP-Seq(GSE60143)/Homer	NHGTTGACYTWD	1	-1.879	0.31	3062	0.0583	762.2	0.056
ETS(ETS)/Promoter/Homer	AACCGGAAGT	1	-1.876	0.3104	3580	0.0682	894.8	0.0657
Hnf1(Homeobox)/Liver-Foxa2-Chip-Seq(GSE25694)/Homer	GGTTAAWCATTAA	1	-1.862	0.314	344	0.0066	78	0.0057
ANAC094(NAC)/col-ANAC094-DAP-Seq(GSE60143)/Homer	DVCGTRNNNNNYACG	1	-1.862	0.314	1578	0.0301	386.2	0.0284
At5g08520(MYBrelated)/colamp-At5g08520-DAP-Seq(GSE60143)/Homer	ADBSTTATCY	1	-1.862	0.314	4335	0.0826	1087.4	0.0799
ANAC096(NAC)/colamp-ANAC096-DAP-Seq(GSE60143)/Homer	TACTTGWNNNWCAAG	1	-1.86	0.314	2163	0.0412	534.7	0.0393
STAT6(Stat)/Macrophage-Stat6-ChIP-Seq(GSE38377)/Homer	TTCCKNAGAA	1	-1.846	0.3165	2623	0.05	652	0.0479
WRKY33(WRKY)/col-WRKY33-DAP-Seq(GSE60143)/Homer	CGTTGACYAW	1	-1.835	0.3192	2575	0.0491	639.7	0.047
bZIP69(bZIP)/col-bZIP69-DAP-Seq(GSE60143)/Homer	GACAGCTGKCAW	1	-1.773	0.3388	609	0.0116	144.7	0.0106
Elk4(ETS)/Hela-Elk4-ChIP-Seq(GSE31477)/Homer	NRYTTCCGGY	1	-1.77	0.3392	5483	0.1045	1383.7	0.1017
CEBP:CEBP(bZIP)/MEF-Chop-ChIP-Seq(GSE35681)/Homer	NTNATGCAAYMNNHTGMAAY	1	-1.767	0.3393	431	0.0082	100.8	0.0074
bZIP16(bZIP)/colamp-bZIP16-DAP-Seq(GSE60143)/Homer	TGCCACGTGD	1	-1.766	0.3393	985	0.0188	238.9	0.0176
ERF8(AP2EREBP)/colamp-ERF8-DAP-Seq(GSE60143)/Homer	CGCCGYCATW	1	-1.762	0.3396	6465	0.1232	1635.4	0.1202
ATY19(MYB)/col-ATY19-DAP-Seq(GSE60143)/Homer	YYCACCWACCAT	1	-1.748	0.3438	2930	0.0558	731.4	0.0537
bZIP68(bZIP)/col-bZIP68-DAP-Seq(GSE60143)/Homer	WGCCACGTGK	1	-1.733	0.3481	1222	0.0233	298.5	0.0219
Eomes(T-box)/H9-Eomes-ChIP-Seq(GSE26097)/Homer	ATTAACACCT	1	-1.724	0.3505	10998	0.2095	2802.5	0.2059
Pknox1(Homeobox)/ES-Prep1-ChIP-Seq(GSE63282)/Homer	SCTGTCAVTCAV	1	-1.713	0.3537	1078	0.0205	262.3	0.0193
bHLH10(bHLH)/colamp-bHLH10-DAP-Seq(GSE60143)/Homer	YACCGACA	1	-1.711	0.3537	779	0.0148	187.3	0.0138
AT1G77200(AP2EREBP)/colamp-AT1G77200-DAP-Seq(GSE60143)/Homer	ACCGACAHWD	1	-1.704	0.3554	2640	0.0503	658.6	0.0484
HIF-1b(HLH)/T47D-HIF1b-ChIP-Seq(GSE59937)/Homer	RTACGTGC	1	-1.688	0.3604	5092	0.097	1285.5	0.0944
At4g28140(AP2EREBP)/colamp-At4g28140-DAP-Seq(GSE60143)/Homer	DCCACCGACCAW	1	-1.675	0.3644	1211	0.0231	296.1	0.0218
DREF/Drosophila-Promoters/Homer	AVYTATCGATAD	1	-1.669	0.3658	18	0.0003	2.3	0.0002
ZNF415(Zf)/HEK293-ZNF415.GFP-ChIP-Seq(GSE58341)/Homer	GRTGMTRGAGCC	1	-1.663	0.3671	3225	0.0614	808.5	0.0594
LRF(Zf)/Erythroblasts-ZBTB7A-ChIP-Seq(GSE74977)/Homer	AAGACCCYYN	1	-1.653	0.3703	9901	0.1886	2522.3	0.1853
VDR(NR),DR3/GM10855-VDR+vitD-ChIP-Seq(GSE22484)/Homer	ARAGGTCANWGAGTTCANNN	1	-1.65	0.3704	1055	0.0201	257.8	0.0189
bZIP48(bZIP)/colamp-bZIP48-DAP-Seq(GSE60143)/Homer	DDWWKVTSACGTGGC	1	-1.629	0.3775	1161	0.0221	284	0.0209
WRKY3(WRKY)/col-WRKY3-DAP-Seq(GSE60143)/Homer	NCKTTGACYDDN	1	-1.626	0.3778	1970	0.0375	489.8	0.036
NTM1(NAC)/col-NTM1-DAP-Seq(GSE60143)/Homer	ACTTRTARAASAAGT	1	-1.621	0.379	1887	0.036	468.4	0.0344
NAP(NAC)/col-NAP-DAP-Seq(GSE60143)/Homer	ARGTTACGTRTN	1	-1.62	0.379	2759	0.0526	690.5	0.0507
ARF16(ARF)/col-ARF16-DAP-Seq(GSE60143)/Homer	ATTTTACGAT	1	-1.619	0.379	398	0.0076	93.7	0.0069
bHLH28(bHLH)/col-bHLH28-DAP-Seq(GSE60143)/Homer	NHHTGTACGGAH	1	-1.613	0.3795	683	0.013	164.3	0.0121
WRKY43(WRKY)/colamp-WRKY43-DAP-Seq(GSE60143)/Homer	NCGTTGACTTTT	1	-1.594	0.386	1072	0.0204	262.2	0.0193
At4g16750(AP2EREBP)/col-At4g16750-DAP-Seq(GSE60143)/Homer	HACCGACAHA	1	-1.585	0.3887	2466	0.047	616.3	0.0453
SeqBias: A/T bias	WWWWWWWWWW	1	-1.584	0.3887	38890	0.7409	10036.7	0.7374
BPC1(BBRBPC)/colamp-BPC1-DAP-Seq(GSE60143)/Homer	GARGAGAGAGAA	1	-1.584	0.3887	2807	0.0535	703.1	0.0517
MYB119(MYB)/colamp-MYB119-DAP-Seq(GSE60143)/Homer	YRACCGTTACDD	1	-1.581	0.3887	853	0.0163	207.2	0.0152
p63(p53)/Keratinocyte-p63-ChIP-Seq(GSE17611)/Homer	NNDRCATGYCYNRRCATGYH	1	-1.574	0.39	1750	0.0333	434.1	0.0319
LBD19(LOBAS2)/colamp-LBD19-DAP-Seq(GSE60143)/Homer	CCKGAAWTTCMGGAW	1	-1.572	0.39	9385	0.1788	2392.6	0.1758
WRKY6(WRKY)/colamp-WRKY6-DAP-Seq(GSE60143)/Homer	NCGTTGACTWWD	1	-1.558	0.3946	2703	0.0515	677.2	0.0498
DDF2(AP2EREBP)/col-DDF2-DAP-Seq(GSE60143)/Homer	GATGTCGRCR	1	-1.539	0.4012	88	0.0017	18.7	0.0014
CBF2(AP2EREBP)/colamp-CBF2-DAP-Seq(GSE60143)/Homer	YBRCCGACATNNNNN	1	-1.533	0.4028	1448	0.0276	358.4	0.0263
WRKY47(WRKY)/colamp-WRKY47-DAP-Seq(GSE60143)/Homer	WAAGTCAACGBT	1	-1.532	0.4028	807	0.0154	196.2	0.0144
ANAC020(NAC)/col-ANAC020-DAP-Seq(GSE60143)/Homer	DVCKTGHNNNDCAAG	1	-1.531	0.4028	1983	0.0378	494.7	0.0363
ABI5(bZIP)/col-ABI5-DAP-Seq(GSE60143)/Homer	GCCACGTG	1	-1.527	0.403	1617	0.0308	401.8	0.0295
ZNF416(Zf)/HEK293-ZNF416.GFP-ChIP-Seq(GSE58341)/Homer	WDNCTGGGCA	1	-1.518	0.4059	7828	0.1491	1993.1	0.1464
TCP1(TCP)/col-TCP1-DAP-Seq(GSE60143)/Homer	GGGGGCCCMMCN	1	-1.517	0.4059	1640	0.0312	407.7	0.03
ZNF528(Zf)/HEK293-ZNF528.GFP-ChIP-Seq(GSE58341)/Homer	AGAAATGACTTCCCT	1	-1.514	0.4059	31	0.0006	5.4	0.0004
RRTF1(AP2EREBP)/colamp-RRTF1-DAP-Seq(GSE60143)/Homer	CCGCCGCHATTT	1	-1.514	0.4059	1293	0.0246	319.8	0.0235
AT1G71450(AP2EREBP)/col-AT1G71450-DAP-Seq(GSE60143)/Homer	DHDWTGTCGGTG	1	-1.506	0.4072	7504	0.143	1910.1	0.1403
AT3G16280(AP2EREBP)/colamp-AT3G16280-DAP-Seq(GSE60143)/Homer	HCACCGACAHHDHHN	1	-1.482	0.4165	983	0.0187	241.9	0.0178
MyoD(bHLH)/Myotube-MyoD-ChIP-Seq(GSE21614)/Homer	RRCAGCTGYTSY	1	-1.481	0.4165	4719	0.0899	1195.2	0.0878
WRKY31(WRKY)/colamp-WRKY31-DAP-Seq(GSE60143)/Homer	NCGTTGACTWWK	1	-1.479	0.4165	2199	0.0419	550.4	0.0404
CBF3(AP2EREBP)/colamp-CBF3-DAP-Seq(GSE60143)/Homer	YNRCCGACATNN	1	-1.479	0.4165	1484	0.0283	368.1	0.027
PIF5ox(bHLH)/Arabidopsis-PIF5ox-ChIP-Seq(GSE35062)/Homer	BCACGTGVDN	1	-1.474	0.4165	4652	0.0886	1178.7	0.0866
bZIP52(bZIP)/colamp-bZIP52-DAP-Seq(GSE60143)/Homer	NDNHCAGCTGTCANN	1	-1.471	0.4169	6862	0.1307	1746	0.1283
VIP1(bZIP)/col-VIP1-DAP-Seq(GSE60143)/Homer	NTTGACAGCTGTCAN	1	-1.465	0.4185	899	0.0171	220.8	0.0162
SMB(NAC)/colamp-SMB-DAP-Seq(GSE60143)/Homer	CTTVNNNNDBAAGHW	1	-1.46	0.4197	3082	0.0587	776.7	0.0571
DEAR3(AP2EREBP)/colamp-DEAR3-DAP-Seq(GSE60143)/Homer	BCACCGACAWNNNNN	1	-1.431	0.4312	925	0.0176	227.1	0.0167
GRE(NR),IR3/A549-GR-ChIP-Seq(GSE32465)/Homer	NRGVACABNVTGTYCY	1	-1.431	0.4312	480	0.0091	115.8	0.0085
At4g32800(AP2EREBP)/colamp-At4g32800-DAP-Seq(GSE60143)/Homer	DYCACCGACAHWWWH	1	-1.399	0.4435	258	0.0049	60.7	0.0045
SPL13(SBP)/col-SPL13-DAP-Seq(GSE60143)/Homer	WAHTGTACGGAH	1	-1.396	0.444	266	0.0051	62	0.0046
VND6(NAC)/col-VND6-DAP-Seq(GSE60143)/Homer	DCTTNHTTTTYAMGY	1	-1.396	0.444	3872	0.0738	980.1	0.072
SpiB(ETS)/OCILY3-SPIB-ChIP-Seq(GSE56857)/Homer	AAAGRGGAAGTG	1	-1.394	0.444	1211	0.0231	300.1	0.022
WRKY7(WRKY)/colamp-WRKY7-DAP-Seq(GSE60143)/Homer	AAAAGTCAACGSHWD	1	-1.383	0.4472	6	0.0001	0.5	0
ZBTB33(Zf)/GM12878-ZBTB33-ChIP-Seq(GSE32465)/Homer	GGVTCTCGCGAGAAC	1	-1.376	0.4497	386	0.0074	92.5	0.0068
Unknown5/Drosophila-Promoters/Homer	GCTGATAASV	1	-1.372	0.4506	2738	0.0522	690.1	0.0507
TOD6?/SacCer-Promoters/Homer	GCGATGAGMT	1	-1.372	0.4506	621	0.0118	152	0.0112
DAG2(C2C2dof)/col-DAG2-DAP-Seq(GSE60143)/Homer	WWTTHACTTTTT	1	-1.364	0.4523	5966	0.1137	1520	0.1117
HSF7(HSF)/colamp-HSF7-DAP-Seq(GSE60143)/Homer	TTCTAGAAGCTTCTA	1	-1.364	0.4523	795	0.0151	195.9	0.0144
At5g58900(MYBrelated)/colamp-At5g58900-DAP-Seq(GSE60143)/Homer	WWWTYTTATCTWWWW	1	-1.359	0.4527	5005	0.0954	1272.6	0.0935
WRKY30(WRKY)/colamp-WRKY30-DAP-Seq(GSE60143)/Homer	CGTTGACTTN	1	-1.354	0.4544	917	0.0175	226.2	0.0166
bZIP53(bZIP)/colamp-bZIP53-DAP-Seq(GSE60143)/Homer	NDNHSACGTGKMNNN	1	-1.327	0.4659	1085	0.0207	269	0.0198
Tcfcp2l1(CP2)/mES-Tcfcp2l1-ChIP-Seq(GSE11431)/Homer	NRAACCRGTTYRAACCRGYT	1	-1.327	0.4659	884	0.0168	219	0.0161
NFAT:AP1(RHD,bZIP)/Jurkat-NFATC1-ChIP-Seq(Jolma_et_al.)/Homer	SARTGGAAAAWRTGAGTCAB	1	-1.299	0.4775	594	0.0113	145	0.0107
RAR:RXR(NR),DR5/ES-RAR-ChIP-Seq(GSE56893)/Homer	AGGTCAAGGTCA	1	-1.296	0.4776	681	0.013	167.7	0.0123
ANAC011(NAC)/col-ANAC011-DAP-Seq(GSE60143)/Homer	TDCTTGYRNNDCAAG	1	-1.293	0.4783	1197	0.0228	298.1	0.0219
NTM2(NAC)/col-NTM2-DAP-Seq(GSE60143)/Homer	CTTRTNNNAYAAGBH	1	-1.293	0.4783	1883	0.0359	473.3	0.0348
ANAC005(NAC)/col-ANAC005-DAP-Seq(GSE60143)/Homer	WVCTTVTWNHABAAG	1	-1.288	0.4787	1777	0.0339	446.4	0.0328
Olig2(bHLH)/Neuron-Olig2-ChIP-Seq(GSE30882)/Homer	RCCATMTGTT	1	-1.285	0.4793	9873	0.1881	2529.2	0.1858
FXR(NR),IR1/Liver-FXR-ChIP-Seq(Chong_et_al.)/Homer	AGGTCANTGACCTB	1	-1.285	0.4793	1855	0.0353	466.4	0.0343
SPL3(SBP)/colamp-SPL3-DAP-Seq(GSE60143)/Homer	WDTTGTACGGAH	1	-1.284	0.4793	121	0.0023	27.2	0.002
NeuroG2(bHLH)/Fibroblast-NeuroG2-ChIP-Seq(GSE75910)/Homer	ACCATCTGTT	1	-1.276	0.4809	7984	0.1521	2042.9	0.1501
Trl(Zf)/S2-GAGAfactor-ChIP-Seq(GSE40646)/Homer	RGAGAGAG	1	-1.272	0.482	16781	0.3197	4315.6	0.3171
LXRE(NR),DR4/RAW-LXRb.biotin-ChIP-Seq(GSE21512)/Homer	RGGTTACTANAGGTCA	1	-1.272	0.482	202	0.0038	47	0.0035
ESE3(AP2EREBP)/col-ESE3-DAP-Seq(GSE60143)/Homer	GACGGTGG	1	-1.271	0.482	8933	0.1702	2287.2	0.168
AREB3(bZIP)/col-AREB3-DAP-Seq(GSE60143)/Homer	NKGMCACGTGDCMNN	1	-1.27	0.482	1062	0.0202	264.8	0.0195
HNF4a(NR),DR1/HepG2-HNF4a-ChIP-Seq(GSE25021)/Homer	CARRGKBCAAAGTYCA	1	-1.256	0.4862	2099	0.04	529	0.0389
ERF4(AP2EREBP)/colamp-ERF4-DAP-Seq(GSE60143)/Homer	WDWTGGCGGCGG	1	-1.238	0.4943	6516	0.1241	1665.7	0.1224
At5g05790(MYBrelated)/col-At5g05790-DAP-Seq(GSE60143)/Homer	AYCTTATC	1	-1.237	0.4943	3563	0.0679	905.4	0.0665
DEAR2(AP2EREBP)/colamp-DEAR2-DAP-Seq(GSE60143)/Homer	HCACCGACAWHD	1	-1.237	0.4943	4236	0.0807	1078.4	0.0792
HDG7(HB)/col-HDG7-DAP-Seq(GSE60143)/Homer	WGCATTTAATGC	1	-1.234	0.4943	377	0.0072	91.7	0.0067
WUS1(Homeobox)/colamp-WUS1-DAP-Seq(GSE60143)/Homer	CAWTCATTCA	1	-1.233	0.4943	1585	0.0302	398.2	0.0293
ERF38(AP2EREBP)/col-ERF38-DAP-Seq(GSE60143)/Homer	CACCGACA	1	-1.224	0.4966	1416	0.027	355.7	0.0261
dof24(C2C2dof)/col-dof24-DAP-Seq(GSE60143)/Homer	TWMCTTTTTG	1	-1.223	0.4966	8871	0.169	2273.6	0.167
At3g11280(MYBrelated)/col-At3g11280-DAP-Seq(GSE60143)/Homer	GATAAGRT	1	-1.221	0.4966	3285	0.0626	834.6	0.0613
AIL7(AP2EREBP)/colamp-AIL7-DAP-Seq(GSE60143)/Homer	KCACRAWTYYCGAGG	1	-1.22	0.4966	1971	0.0376	497.2	0.0365
RAR:RXR(NR),DR5/ES-RAR-ChIP-Seq(GSE56893)/Homer	RGGTCADNNAGAGGTCAV	1	-1.21	0.4999	156	0.003	36.6	0.0027
CAMTA5(CAMTA)/col-CAMTA5-DAP-Seq(GSE60143)/Homer	ACGCGTTTTANACRC	1	-1.209	0.4999	854	0.0163	212.8	0.0156
ANAC047(NAC)/colamp-ANAC047-DAP-Seq(GSE60143)/Homer	WACACGTAACTT	1	-1.208	0.4999	2013	0.0384	508.3	0.0373
AGL6(MADS)/col-AGL6-DAP-Seq(GSE60143)/Homer	TTWCCWWAWWDGGWA	1	-1.198	0.503	320	0.0061	77.7	0.0057
RAP212(AP2EREBP)/col-RAP212-DAP-Seq(GSE60143)/Homer	CGCCGCCATTTT	1	-1.195	0.5036	4911	0.0936	1253.4	0.0921
AT1G12630(AP2EREBP)/colamp-AT1G12630-DAP-Seq(GSE60143)/Homer	TGTCGGCA	1	-1.191	0.505	1746	0.0333	440.2	0.0323
IRF8(IRF)/BMDM-IRF8-ChIP-Seq(GSE77884)/Homer	GRAASTGAAAST	1	-1.186	0.5067	1515	0.0289	382	0.0281
RAV1(RAV)/colamp-RAV1-DAP-Seq(GSE60143)/Homer	TWWTTTCTGTTG	1	-1.18	0.5087	2611	0.0497	662.1	0.0486
ASL18(LOBAS2)/colamp-ASL18-DAP-Seq(GSE60143)/Homer	CCGGAAAWTCMGGAR	1	-1.178	0.5087	9735	0.1855	2498.2	0.1835
Erra(NR)/HepG2-Erra-ChIP-Seq(GSE31477)/Homer	CAAAGGTCAG	1	-1.17	0.5121	12334	0.235	3170.7	0.233
Unknown4/Arabidopsis-Promoters/Homer	CKTCKTCTTY	1	-1.168	0.5121	4290	0.0817	1094.4	0.0804
NFkB-p50,p52(RHD)/Monocyte-p50-ChIP-Chip(Schreiber_et_al.)/Homer	GGGGGAATCCCC	1	-1.168	0.5121	993	0.0189	248	0.0182
BBX31(Orphan)/col-BBX31-DAP-Seq(GSE60143)/Homer	NAAAAAGTDA	1	-1.161	0.5139	6280	0.1196	1607.3	0.1181
PIF4(bHLH)/Seedling-PIF4-ChIP-Seq(GSE35315)/Homer	NNBCACGTGN	1	-1.157	0.515	5364	0.1022	1371.6	0.1008
GBF6(bZIP)/colamp-GBF6-DAP-Seq(GSE60143)/Homer	WWTGMCACGTCABCW	1	-1.157	0.515	745	0.0142	185.8	0.0137
AT3G25990(Trihelix)/colamp-AT3G25990-DAP-Seq(GSE60143)/Homer	TTAACCATAG	1	-1.155	0.515	2702	0.0515	686.9	0.0505
ANAC057(NAC)/colamp-ANAC057-DAP-Seq(GSE60143)/Homer	DVCKTGNNNNNCAMG	1	-1.138	0.5219	2459	0.0468	624.2	0.0459
At2g45680(TCP)/colamp-At2g45680-DAP-Seq(GSE60143)/Homer	GTGGGNCCCACNDND	1	-1.13	0.5254	258	0.0049	62.4	0.0046
MYB3R5(MYB)/col-MYB3R5-DAP-Seq(GSE60143)/Homer	THYAACGGTHAWAWT	1	-1.126	0.5263	162	0.0031	38.4	0.0028
KANADI1(Myb)/Seedling-KAN1-ChIP-Seq(GSE48081)/Homer	ARGAATAWWN	1	-1.121	0.5284	3756	0.0716	958.7	0.0704
ANAC083(NAC)/col-ANAC083-DAP-Seq(GSE60143)/Homer	CKTRWNNNWYAMGTA	1	-1.113	0.5313	2223	0.0424	564.9	0.0415
AT5G59990(C2C2COlike)/colamp-AT5G59990-DAP-Seq(GSE60143)/Homer	TCTCAACCGTTCATT	1	-1.1	0.5376	105	0.002	24.4	0.0018
At1g64620(C2C2dof)/colamp-At1g64620-DAP-Seq(GSE60143)/Homer	CACTTTTT	1	-1.089	0.5424	5971	0.1138	1530.9	0.1125
dof43(C2C2dof)/colamp-dof43-DAP-Seq(GSE60143)/Homer	NAAAAAGTDA	1	-1.086	0.5431	5769	0.1099	1478.3	0.1086
SeqBias: TA-repeat	TATATATATA	1	-1.07	0.5512	9027	0.172	2320.7	0.1705
bZIP44(bZIP)/colamp-bZIP44-DAP-Seq(GSE60143)/Homer	NDTGCCACGTCAGCH	1	-1.064	0.5532	80	0.0015	18.3	0.0013
AGL13(MADS)/col-AGL13-DAP-Seq(GSE60143)/Homer	TWCCAWWTWTGGWAA	1	-1.052	0.5588	104	0.002	24.5	0.0018
WRKY50(WRKY)/col-WRKY50-DAP-Seq(GSE60143)/Homer	NNTTGACTWNNGNNN	1	-1.052	0.5588	3278	0.0625	837.2	0.0615
AT3G52440(C2C2dof)/colamp-AT3G52440-DAP-Seq(GSE60143)/Homer	DTHACTTTTT	1	-1.047	0.56	9580	0.1825	2464.5	0.1811
ZNF264(Zf)/HEK293-ZNF264.GFP-ChIP-Seq(GSE58341)/Homer	RGGGCACTAACY	1	-1.043	0.5609	3114	0.0593	795.1	0.0584
Pho2(bHLH)/Yeast-Pho2-ChIP-Seq(GSE29506)/Homer	CCCACGTGCT	1	-1.031	0.5672	2324	0.0443	592.5	0.0435
ANAC058(NAC)/col-ANAC058-DAP-Seq(GSE60143)/Homer	TWCTTGTDNNACAAG	1	-1.021	0.5715	1767	0.0337	449.9	0.0331
ZBTB18(Zf)/HEK293-ZBTB18.GFP-ChIP-Seq(GSE58341)/Homer	AACATCTGGA	1	-1.019	0.5719	2688	0.0512	687	0.0505
MafA(bZIP)/Islet-MafA-ChIP-Seq(GSE30298)/Homer	TGCTGACTCA	1	-1.001	0.581	6128	0.1167	1574.1	0.1157
GBF5(bZIP)/colamp-GBF5-DAP-Seq(GSE60143)/Homer	WKNWSACGTGGCAWN	1	-0.9996	0.581	1072	0.0204	271.7	0.02
DPL-1(E2F)/cElegans-Adult-ChIP-Seq(modEncode)/Homer	TAGCGCGC	1	-0.9981	0.581	6112	0.1164	1570.5	0.1154
ZNF692(Zf)/HEK293-ZNF692.GFP-ChIP-Seq(GSE58341)/Homer	GTGGGCCCCA	1	-0.9902	0.5845	724	0.0138	182.2	0.0134
Mef2b(MADS)/HEK293-Mef2b.V5-ChIP-Seq(GSE67450)/Homer	GCTATTTTTGGM	1	-0.9884	0.5846	2642	0.0503	675.7	0.0496
MYB74(MYB)/colamp-MYB74-DAP-Seq(GSE60143)/Homer	YYYACCTACCWH	1	-0.9869	0.5846	2339	0.0446	597.6	0.0439
MYB3R1(MYB)/col-MYB3R1-DAP-Seq(GSE60143)/Homer	WWDTDACCGTTR	1	-0.9788	0.5882	653	0.0124	164.3	0.0121
Rap210(AP2EREBP)/col-Rap210-DAP-Seq(GSE60143)/Homer	TGTCGGCA	1	-0.9728	0.5907	1922	0.0366	490.6	0.036
WRKY15(WRKY)/col-WRKY15-DAP-Seq(GSE60143)/Homer	VGTTGACTWW	1	-0.9565	0.5995	3131	0.0597	802.9	0.059
PTF1(TCP)/colamp-PTF1-DAP-Seq(GSE60143)/Homer	RDDGGGACCACA	1	-0.9508	0.6019	409	0.0078	102.3	0.0075
GAGA-repeat/SacCer-Promoters/Homer	CTYTCTYTCTCTCTC	1	-0.9367	0.6093	20383	0.3883	5267.8	0.387
LCL1(MYBrelated)/colamp-LCL1-DAP-Seq(GSE60143)/Homer	NAAAATATCTWHWWN	1	-0.9364	0.6093	330	0.0063	82.3	0.006
WRKY75(WRKY)/col-WRKY75-DAP-Seq(GSE60143)/Homer	CGTTGACTWW	1	-0.936	0.6093	3020	0.0575	774.9	0.0569
ANAC062(NAC)/colamp-ANAC062-DAP-Seq(GSE60143)/Homer	TACTTANTNWNYAAG	1	-0.9354	0.6093	1328	0.0253	338.3	0.0249
WRKY24(WRKY)/colamp-WRKY24-DAP-Seq(GSE60143)/Homer	CGTTGACTWW	1	-0.9341	0.6093	2667	0.0508	683.2	0.0502
Tbx5(T-box)/HL1-Tbx5.biotin-ChIP-Seq(GSE21529)/Homer	AGGTGTCA	1	-0.9291	0.6093	18409	0.3507	4756.9	0.3495
ZNF16(Zf)/HEK293-ZNF16.GFP-ChIP-Seq(GSE58341)/Homer	MACCTTCYATGGCTCCCTAKTGCCY	1	-0.9142	0.617	33	0.0006	7.2	0.0005
ZNF669(Zf)/HEK293-ZNF669.GFP-ChIP-Seq(GSE58341)/Homer	GARTGGTCATCGCCC	1	-0.908	0.6198	321	0.0061	80.4	0.0059
ARE(NR)/LNCAP-AR-ChIP-Seq(GSE27824)/Homer	RGRACASNSTGTYCYB	1	-0.9073	0.6198	1112	0.0212	283.3	0.0208
Pax7(Paired,Homeobox),long/Myoblast-Pax7-ChIP-Seq(GSE25064)/Homer	TAATCHGATTAC	1	-0.9071	0.6198	45	0.0009	10.8	0.0008
MYB(HTH)/ERMYB-Myb-ChIPSeq(GSE22095)/Homer	GGCVGTTR	1	-0.894	0.6254	8735	0.1664	2253.6	0.1656
HSF3(HSF)/colamp-HSF3-DAP-Seq(GSE60143)/Homer	NTTCTAGAAKCTTCT	1	-0.8915	0.6259	3905	0.0744	1004.6	0.0738
AT1G23810(Orphan)/col-AT1G23810-DAP-Seq(GSE60143)/Homer	TTCTAGAAGSTTCTA	1	-0.8863	0.6281	183	0.0035	45.8	0.0034
At1g14580(C2H2)/colamp-At1g14580-DAP-Seq(GSE60143)/Homer	CASAAAAMGACAAAA	1	-0.8776	0.6326	795	0.0151	202	0.0148
WRKY40(WRKY)/colamp-WRKY40-DAP-Seq(GSE60143)/Homer	AHWAGTCAAC	1	-0.877	0.6326	1839	0.035	471.4	0.0346
O2(bZIP)/Corn-O2-ChIP-Seq(GSE63991)/Homer	GCTGACGTGGCA	1	-0.873	0.6334	608	0.0116	154.9	0.0114
AT4G00250(GeBP)/col-AT4G00250-DAP-Seq(GSE60143)/Homer	WDTGGATAAKRT	1	-0.8664	0.6366	1617	0.0308	414.3	0.0304
E-box/Arabidopsis-Promoters/Homer	GCCACGTG	1	-0.8663	0.6366	2237	0.0426	574.8	0.0422
Unknown2/Arabidopsis-Promoters/Homer	AAACGACGTCGTTTT	1	-0.853	0.643	12	0.0002	2.2	0.0002
bZIP3(bZIP)/col-bZIP3-DAP-Seq(GSE60143)/Homer	DWKNHSACGTGGCAD	1	-0.8353	0.6535	1707	0.0325	438.9	0.0322
Myf5(bHLH)/GM-Myf5-ChIP-Seq(GSE24852)/Homer	BAACAGCTGT	1	-0.8299	0.6559	4190	0.0798	1080.4	0.0794
SND3(NAC)/col-SND3-DAP-Seq(GSE60143)/Homer	CTTNHNNNDNAAGNH	1	-0.8146	0.665	2355	0.0449	606.2	0.0445
HSFA6B(HSF)/colamp-HSFA6B-DAP-Seq(GSE60143)/Homer	NTTCTAGAANHTTCT	1	-0.7938	0.6778	2078	0.0396	535.9	0.0394
Pax7(Paired,Homeobox),longest/Myoblast-Pax7-ChIP-Seq(GSE25064)/Homer	NTAATTDGCYAATTANNWWD	1	-0.7821	0.6847	43	0.0008	10	0.0007
ABF1/SacCer-Promoters/Homer	CGTRNAAARTGA	1	-0.7693	0.6924	745	0.0142	191.4	0.0141
c-Myc(bHLH)/LNCAP-cMyc-ChIP-Seq(Unpublished)/Homer	VCCACGTG	1	-0.7604	0.6974	2673	0.0509	691	0.0508
SPL5(SBP)/colamp-SPL5-DAP-Seq(GSE60143)/Homer	NNHGTACGGHNN	1	-0.7509	0.7029	1111	0.0212	286.3	0.021
FAR1(FAR1)/col-FAR1-DAP-Seq(GSE60143)/Homer	TKNNNYYCACGCGCY	1	-0.7505	0.7029	705	0.0134	181.2	0.0133
AT1G10720(BSD)/col-AT1G10720-DAP-Seq(GSE60143)/Homer	TTCTAGAAKCTTCTA	1	-0.7488	0.7029	128	0.0024	32.7	0.0024
SCL(bHLH)/HPC7-Scl-ChIP-Seq(GSE13511)/Homer	AVCAGCTG	1	-0.7441	0.7044	28403	0.5411	7360.2	0.5408
DEL1(E2FDP)/colamp-DEL1-DAP-Seq(GSE60143)/Homer	TTCCCGCCAA	1	-0.7417	0.7049	54	0.001	13.7	0.001
ERF9(AP2EREBP)/colamp-ERF9-DAP-Seq(GSE60143)/Homer	AWATGGCGGCGG	1	-0.7403	0.7049	2207	0.042	570.6	0.0419
FHY3(FAR1)/Arabidopsis-FHY3-ChIP-Seq(GSE30711)/Homer	HHCACGCGCBTN	1	-0.7388	0.7049	1867	0.0356	482.3	0.0354
RKD2(RWPRK)/colamp-RKD2-DAP-Seq(GSE60143)/Homer	GACKTTTCRDCTTCC	1	-0.7359	0.7056	2940	0.056	760.9	0.0559
LBD2(LOBAS2)/colamp-LBD2-DAP-Seq(GSE60143)/Homer	TCCGAWTTTTTCGGN	1	-0.7333	0.7063	1403	0.0267	363	0.0267
HOXA2(Homeobox)/mES-Hoxa2-ChIP-Seq(Donaldson_et_al.)/Homer	GYCATCMATCAT	1	-0.7303	0.7073	290	0.0055	74.2	0.0055
SOC1(MADS)/Seedling-SOC1-ChIP-Seq(GSE45846)/Homer	TWCCAWWTWTGG	1	-0.7273	0.7083	1163	0.0222	300.8	0.0221
bHLH130(bHLH)/col-bHLH130-DAP-Seq(GSE60143)/Homer	GCAACTTG	1	-0.7185	0.7134	2679	0.051	693.7	0.051
At5g29000(G2like)/col-At5g29000-DAP-Seq(GSE60143)/Homer	RGAATATTCYHH	1	-0.7167	0.7136	776	0.0148	200.2	0.0147
AT5G47660(Trihelix)/colamp-AT5G47660-DAP-Seq(GSE60143)/Homer	AWTTTTACCG	1	-0.7113	0.7163	5421	0.1033	1404.8	0.1032
At1g19000(MYBrelated)/colamp-At1g19000-DAP-Seq(GSE60143)/Homer	WWTGGATAADDT	1	-0.7019	0.7219	2507	0.0478	649.6	0.0477
RORgt(NR)/EL4-RORgt.Flag-ChIP-Seq(GSE56019)/Homer	AAYTAGGTCA	1	-0.7009	0.7219	443	0.0084	114.1	0.0084
TCP7(TCP)/col-TCP7-DAP-Seq(GSE60143)/Homer	GTGGGSCCCACHHNN	1	-0.6998	0.7219	2499	0.0476	647.6	0.0476
ETS:RUNX(ETS,Runt)/Jurkat-RUNX1-ChIP-Seq(GSE17954)/Homer	RCAGGATGTGGT	1	-0.6917	0.7259	616	0.0117	159.5	0.0117
ABF2(bZIP)/col-ABF2-DAP-Seq(GSE60143)/Homer	KGMCACGTGDCMHHH	1	-0.6831	0.731	812	0.0155	210.4	0.0155
AT3G42860(zfGRF)/col-AT3G42860-DAP-Seq(GSE60143)/Homer	CGTTGACTTN	1	-0.6794	0.7326	804	0.0153	208.9	0.0153
AS2(LOBAS2)/col-AS2-DAP-Seq(GSE60143)/Homer	CCGDAAWWHMCGSCG	1	-0.6771	0.7331	484	0.0092	125.2	0.0092
bZIP42(bZIP)/colamp-bZIP42-DAP-Seq(GSE60143)/Homer	GCCACGTCAGCA	1	-0.6636	0.7407	18	0.0003	4.6	0.0003
ZML1(C2C2gata)/colamp-ZML1-DAP-Seq(GSE60143)/Homer	ATCWYRACCGTTSRW	1	-0.6636	0.7407	18	0.0003	4.3	0.0003
AT1G72740(MYBrelated)/colamp-AT1G72740-DAP-Seq(GSE60143)/Homer	NNWWAMCCTAAHWNN	1	-0.6582	0.7436	4794	0.0913	1244	0.0914
AT5G60130(ABI3VP1)/col-AT5G60130-DAP-Seq(GSE60143)/Homer	WTTYTAAGVAAA	1	-0.6538	0.7457	7152	0.1363	1856.8	0.1364
WRKY22(WRKY)/colamp-WRKY22-DAP-Seq(GSE60143)/Homer	WWAAAGTCAACK	1	-0.6528	0.7457	2038	0.0388	529.9	0.0389
bHLHE40(bHLH)/HepG2-BHLHE40-ChIP-Seq(GSE31477)/Homer	KCACGTGMCN	1	-0.6492	0.7469	1637	0.0312	426	0.0313
Mouse_Recombination_Hotspot(Zf)/Testis-DMC1-ChIP-Seq(GSE24438)/Homer	ACTYKNATTCGTGNTACTTC	1	-0.6404	0.7523	209	0.004	54.2	0.004
MafF(bZIP)/HepG2-MafF-ChIP-Seq(GSE31477)/Homer	HWWGTCAGCAWWTTT	1	-0.6373	0.7534	866	0.0165	225.9	0.0166
At2g41835(C2H2)/col-At2g41835-DAP-Seq(GSE60143)/Homer	TTTGAAAA	1	-0.6351	0.7539	1747	0.0333	454.8	0.0334
ANAC004(NAC)/colamp-ANAC004-DAP-Seq(GSE60143)/Homer	WNCTTVYNNNRBAAG	1	-0.6278	0.7583	1269	0.0242	330.6	0.0243
AT2G20400(G2like)/colamp-AT2G20400-DAP-Seq(GSE60143)/Homer	DNVGAATATTCBNHN	1	-0.6212	0.7622	350	0.0067	91.3	0.0067
IDD4(C2H2)/col-IDD4-DAP-Seq(GSE60143)/Homer	TTTGTCTTTWTB	1	-0.6148	0.7658	3384	0.0645	880.9	0.0647
E2F1(E2F)/Hela-E2F1-ChIP-Seq(GSE22478)/Homer	CWGGCGGGAA	1	-0.6097	0.7686	2067	0.0394	538.8	0.0396
OBP4(C2C2dof)/col-OBP4-DAP-Seq(GSE60143)/Homer	WTTHACTTTTTB	1	-0.602	0.7734	5480	0.1044	1425.5	0.1047
ELT-3(Gata)/cElegans-L1-ELT3-ChIP-Seq(modEncode)/Homer	AWTGATAAGA	1	-0.5995	0.7741	1462	0.0279	381.6	0.028
Nkx3.1(Homeobox)/LNCaP-Nkx3.1-ChIP-Seq(GSE28264)/Homer	AAGCACTTAA	1	-0.5971	0.7748	11392	0.217	2960	0.2175
Srebp2(bHLH)/HepG2-Srebp2-ChIP-Seq(GSE31477)/Homer	CGGTCACSCCAC	1	-0.5938	0.7761	632	0.012	165.9	0.0122
WRKY25(WRKY)/colamp-WRKY25-DAP-Seq(GSE60143)/Homer	NNNNHRGTCAAMNNN	1	-0.593	0.7761	3615	0.0689	941.7	0.0692
HSFA6A(HSF)/col-HSFA6A-DAP-Seq(GSE60143)/Homer	RGAAGNTTCTAGAAN	1	-0.5916	0.7761	184	0.0035	48.5	0.0036
HAT1(Homeobox)/col-HAT1-DAP-Seq(GSE60143)/Homer	SCAATCATTGNN	1	-0.5895	0.7761	375	0.0071	98.3	0.0072
At5g66730(C2H2)/colamp-At5g66730-DAP-Seq(GSE60143)/Homer	TTTGTCKTTTTK	1	-0.5887	0.7761	950	0.0181	248.2	0.0182
CDF3(C2C2dof)/colamp-CDF3-DAP-Seq(GSE60143)/Homer	AAAAGTRM	1	-0.5831	0.7785	7378	0.1406	1919.1	0.141
GFX(?)/Promoter/Homer	ATTCTCGCGAGA	1	-0.5812	0.7789	195	0.0037	51.2	0.0038
E2A(bHLH)/proBcell-E2A-ChIP-Seq(GSE21978)/Homer	DNRCAGCTGY	1	-0.5802	0.7789	10709	0.204	2784.1	0.2046
TCP17(TCP)/col-TCP17-DAP-Seq(GSE60143)/Homer	GTGGTCCCCA	1	-0.5767	0.78	252	0.0048	66.4	0.0049
At1g69690(TCP)/colamp-At1g69690-DAP-Seq(GSE60143)/Homer	NHGTGGGGCCCACHW	1	-0.5512	0.7989	1092	0.0208	286.1	0.021
PGR(NR)/EndoStromal-PGR-ChIP-Seq(GSE69539)/Homer	AAGAACATWHTGTTC	1	-0.5473	0.8009	701	0.0134	184.3	0.0135
AtIDD11(C2H2)/colamp-AtIDD11-DAP-Seq(GSE60143)/Homer	TTTGTCGTTT	1	-0.5227	0.8196	1311	0.025	344.6	0.0253
CAMTA1(CAMTA)/col-CAMTA1-DAP-Seq(GSE60143)/Homer	WWAACGCGTT	1	-0.5119	0.8273	2287	0.0436	599.3	0.044
MYB105(MYB)/colamp-MYB105-DAP-Seq(GSE60143)/Homer	RATWCCGTTA	1	-0.506	0.8309	2125	0.0405	557.8	0.041
DEL2(E2FDP)/col-DEL2-DAP-Seq(GSE60143)/Homer	WTTTCSCGCC	1	-0.4943	0.8394	2173	0.0414	570	0.0419
WRKY17(WRKY)/colamp-WRKY17-DAP-Seq(GSE60143)/Homer	GCGTTGACTTTT	1	-0.4907	0.8412	23	0.0004	6.4	0.0005
GTL1(Trihelix)/colamp-GTL1-DAP-Seq(GSE60143)/Homer	WWTTTACCKY	1	-0.4809	0.8482	4200	0.08	1099.3	0.0808
GAGA-repeat/Arabidopsis-Promoters/Homer	CTCTCTCTCY	1	-0.4764	0.8508	6158	0.1173	1609.3	0.1182
HSFC1(HSF)/col-HSFC1-DAP-Seq(GSE60143)/Homer	HTTCTAGAADCTTCT	1	-0.4743	0.8513	885	0.0169	234.2	0.0172
IDD5(C2H2)/colamp-IDD5-DAP-Seq(GSE60143)/Homer	TTTTGTCTTTTTBTK	1	-0.4741	0.8513	2779	0.0529	729.3	0.0536
At4g38000(C2C2dof)/col-At4g38000-DAP-Seq(GSE60143)/Homer	WWWTWACTTTTT	1	-0.4501	0.8696	3959	0.0754	1038.9	0.0763
At1g76110(ARID)/colamp-At1g76110-DAP-Seq(GSE60143)/Homer	ATTTAATG	1	-0.4477	0.8704	1779	0.0339	469.6	0.0345
IDD7(C2H2)/col-IDD7-DAP-Seq(GSE60143)/Homer	TTTGTCKTTTTN	1	-0.4459	0.8706	1286	0.0245	340.2	0.025
HAT5(Homeobox)/colamp-HAT5-DAP-Seq(GSE60143)/Homer	DCAATWATTG	1	-0.4376	0.8766	252	0.0048	68.6	0.005
ANAC103(NAC)/col-ANAC103-DAP-Seq(GSE60143)/Homer	AACTTGNWNWNCAAG	1	-0.4334	0.879	1250	0.0238	331.1	0.0243
E2FA(E2FDP)/colamp-E2FA-DAP-Seq(GSE60143)/Homer	WWTGGCGCCAWWWNN	1	-0.431	0.8798	2721	0.0518	716.3	0.0526
Atoh1(bHLH)/Cerebellum-Atoh1-ChIP-Seq(GSE22111)/Homer	VNRVCAGCTGGY	1	-0.4239	0.8848	6132	0.1168	1606.6	0.118
IRF3(IRF)/BMDM-Irf3-ChIP-Seq(GSE67343)/Homer	AGTTTCAKTTTC	1	-0.4183	0.8884	1267	0.0241	336.8	0.0247
At2g03500(G2like)/col-At2g03500-DAP-Seq(GSE60143)/Homer	WWAGAATATTCT	1	-0.4036	0.9003	695	0.0132	186.4	0.0137
MYB62(MYB)/colamp-MYB62-DAP-Seq(GSE60143)/Homer	NTACCTAACT	1	-0.4005	0.9018	6839	0.1303	1792.9	0.1317
USF1(bHLH)/GM12878-Usf1-ChIP-Seq(GSE32465)/Homer	SGTCACGTGR	1	-0.3951	0.9054	2259	0.043	597.8	0.0439
AT4G27900(C2C2COlike)/col-AT4G27900-DAP-Seq(GSE60143)/Homer	TCTCVACCGTTSATT	1	-0.389	0.9096	11	0.0002	3	0.0002
STOP1(C2H2)/colamp-STOP1-DAP-Seq(GSE60143)/Homer	DTATCTGGKGRAGGT	1	-0.3885	0.9096	2002	0.0381	530.6	0.039
MYB98(MYB)/col-MYB98-DAP-Seq(GSE60143)/Homer	NWDCCGTTAC	1	-0.3845	0.911	981	0.0187	262	0.0193
ATHB6(Homeobox)/Arabidopsis-HB6-ChIP-Seq(GSE80564)/Homer	CAATNATTBN	1	-0.3833	0.911	1879	0.0358	498.6	0.0366
HSFA1E(HSF)/col-HSFA1E-DAP-Seq(GSE60143)/Homer	TTCTAGAAGCTTCTA	1	-0.3712	0.9205	330	0.0063	90.4	0.0066
ATHB20(Homeobox)/colamp-ATHB20-DAP-Seq(GSE60143)/Homer	CAATHATT	1	-0.3699	0.9205	926	0.0176	248.8	0.0183
Nkx2.2(Homeobox)/NPC-Nkx2.2-ChIP-Seq(GSE61673)/Homer	BTBRAGTGSN	1	-0.3539	0.9339	9733	0.1854	2550.3	0.1874
E2F3(E2F)/MEF-E2F3-ChIP-Seq(GSE71376)/Homer	BTKGGCGGGAAA	1	-0.3456	0.9403	5625	0.1072	1480.6	0.1088
IRF4(IRF)/GM12878-IRF4-ChIP-Seq(GSE32465)/Homer	ACTGAAACCA	1	-0.3452	0.9403	2009	0.0383	534.8	0.0393
GT1(Trihelix)/col-GT1-DAP-Seq(GSE60143)/Homer	TTAACCATGGTTAAD	1	-0.3446	0.9403	17	0.0003	5.7	0.0004
ZIM(C2C2gata)/col-ZIM-DAP-Seq(GSE60143)/Homer	ATCSRACGGTYRAGA	1	-0.3446	0.9403	17	0.0003	5.7	0.0004
ETV1(ETS)/GIST48-ETV1-ChIP-Seq(GSE22441)/Homer	AACCGGAAGT	1	-0.3219	0.9573	10795	0.2057	2830.5	0.208
CES-1(Homeobox)/cElegans-L1-CES1-ChIP-Seq(modEncode)/Homer	AAATTSAATTTN	1	-0.3209	0.9573	1567	0.0299	419	0.0308
Ptf1a(bHLH)/Panc1-Ptf1a-ChIP-Seq(GSE47459)/Homer	ACAGCTGTTN	1	-0.3136	0.9626	17023	0.3243	4451.4	0.3271
CRX(Homeobox)/Retina-Crx-ChIP-Seq(GSE20012)/Homer	GCTAATCC	1	-0.3066	0.968	12359	0.2355	3239.1	0.238
At5g22890(C2H2)/col-At5g22890-DAP-Seq(GSE60143)/Homer	NSAGGTKWTATCTGD	1	-0.3049	0.9682	104	0.002	30.1	0.0022
MYB4(MYB)/col200-MYB4-DAP-Seq(GSE60143)/Homer	WAGKTAGGTARR	1	-0.3049	0.9682	2282	0.0435	608.4	0.0447
BPC6(BBRBPC)/col-BPC6-DAP-Seq(GSE60143)/Homer	YTYTCTCTCTCTCTA	1	-0.3035	0.9682	254	0.0048	71.9	0.0053
CUC1(NAC)/col-CUC1-DAP-Seq(GSE60143)/Homer	TACTTGTNNNACAAG	1	-0.2989	0.9699	1309	0.0249	353	0.0259
GBF3(bZIP)/Arabidopsis-GBF3-ChIP-Seq(GSE80564)/Homer	TGCCACGTSAYC	1	-0.2968	0.9706	1479	0.0282	397.8	0.0292
E2F(E2F)/Hela-CellCycle-Expression/Homer	TTSGCGCGAAAA	1	-0.2948	0.9711	424	0.0081	118	0.0087
CUC2(NAC)/colamp-CUC2-DAP-Seq(GSE60143)/Homer	TRCKTGTNNNWCAMG	1	-0.2947	0.9711	972	0.0185	263.5	0.0194
MYB65(MYB)/colamp-MYB65-DAP-Seq(GSE60143)/Homer	RACNGTTA	1	-0.2939	0.9711	4533	0.0864	1199	0.0881
SeqBias: polyA-repeat	AAAAAAAAAA	1	-0.2916	0.9711	50354	0.9593	13074	0.9606
AT1G69570(C2C2dof)/col-AT1G69570-DAP-Seq(GSE60143)/Homer	WAAAAGTGHH	1	-0.2818	0.9784	4655	0.0887	1232.1	0.0905
HSF21(HSF)/col-HSF21-DAP-Seq(GSE60143)/Homer	CTTCTAGAAGMTTYW	1	-0.2775	0.9812	385	0.0073	108	0.0079
HEB(bHLH)/mES-Heb-ChIP-Seq(GSE53233)/Homer	VCAGCTGBNN	1	-0.2755	0.9817	13127	0.2501	3443.4	0.253
Cbf1(bHLH)/Yeast-Cbf1-ChIP-Seq(GSE29506)/Homer	TCACGTGAYH	1	-0.2745	0.9817	1433	0.0273	387	0.0284
RARg(NR)/ES-RARg-ChIP-Seq(GSE30538)/Homer	AGGTCAAGGTCA	1	-0.2745	0.9817	259	0.0049	73.9	0.0054
ZEB1(Zf)/PDAC-ZEB1-ChIP-Seq(GSE64557)/Homer	VCAGGTRDRY	1	-0.2728	0.9817	11935	0.2274	3133.1	0.2302
At5g08750(C3H)/col-At5g08750-DAP-Seq(GSE60143)/Homer	NWDTTGCGGCTR	1	-0.2714	0.9817	1883	0.0359	505.3	0.0371
EBNA1(EBV-virus)/Raji-EBNA1-ChIP-Seq(GSE30709)/Homer	GGYAGCAYDTGCTDCCCNNN	1	-0.2653	0.9849	70	0.0013	21.8	0.0016
ANAC087(NAC)/col-ANAC087-DAP-Seq(GSE60143)/Homer	WVCKTGHNNNWCAMG	1	-0.2546	0.9941	909	0.0173	248.6	0.0183
AT5G22990(C2H2)/col-AT5G22990-DAP-Seq(GSE60143)/Homer	WCGAHDTCGWHN	1	-0.2479	0.9994	242	0.0046	69.6	0.0051
EFL-1(E2F)/cElegans-L1-EFL1-ChIP-Seq(modEncode)/Homer	TGCAARYGCGCTCYA	1	-0.2444	1	115	0.0022	34.9	0.0026
AT5G56840(MYBrelated)/colamp-AT5G56840-DAP-Seq(GSE60143)/Homer	TGGATAAGGT	1	-0.2354	1	4638	0.0884	1232.7	0.0906
JGL(C2H2)/col-JGL-DAP-Seq(GSE60143)/Homer	ACYTTCAGTT	1	-0.2321	1	6802	0.1296	1799.9	0.1322
AT4G12670(MYBrelated)/col-AT4G12670-DAP-Seq(GSE60143)/Homer	AGGGTTTAGGGTTTA	1	-0.2306	1	1	0	0	0
At3g45610(C2C2dof)/col-At3g45610-DAP-Seq(GSE60143)/Homer	TWACTTTTTS	1	-0.226	1	6073	0.1157	1609.6	0.1183
PRDM9(Zf)/Testis-DMC1-ChIP-Seq(GSE35498)/Homer	ADGGYAGYAGCATCT	1	-0.2196	1	2097	0.04	565.4	0.0415
RUNX1(Runt)/Jurkat-RUNX1-ChIP-Seq(GSE29180)/Homer	AAACCACARM	1	-0.2116	1	5780	0.1101	1534.4	0.1127
TBP3(MYBrelated)/col-TBP3-DAP-Seq(GSE60143)/Homer	VYTAGGGCAN	1	-0.2089	1	4193	0.0799	1118.8	0.0822
THRb(NR)/Liver-NR1A2-ChIP-Seq(GSE52613)/Homer	TRAGGTCA	1	-0.2087	1	21646	0.4124	5669.5	0.4166
bHLH34(bHLH)/colamp-bHLH34-DAP-Seq(GSE60143)/Homer	HGWGRHWGACACGTG	1	-0.2082	1	1298	0.0247	354.5	0.026
T1ISRE(IRF)/ThioMac-Ifnb-Expression/Homer	ACTTTCGTTTCT	1	-0.2075	1	40	0.0008	14	0.001
MYB3R4(MYB)/col-MYB3R4-DAP-Seq(GSE60143)/Homer	AWWTAACCGTTR	1	-0.2074	1	388	0.0074	110.7	0.0081
RAP21(AP2EREBP)/colamp-RAP21-DAP-Seq(GSE60143)/Homer	BCACCGACAHNN	1	-0.2073	1	506	0.0096	142.2	0.0104
NUC(C2H2)/col-NUC-DAP-Seq(GSE60143)/Homer	HAVAAAACGACAAAA	1	-0.2021	1	325	0.0062	93.8	0.0069
HOXB13(Homeobox)/ProstateTumor-HOXB13-ChIP-Seq(GSE56288)/Homer	TTTTATKRGG	1	-0.201	1	3893	0.0742	1040.3	0.0764
CUC3(NAC)/col-CUC3-DAP-Seq(GSE60143)/Homer	TRCKTGWNNNACAMG	1	-0.2003	1	970	0.0185	268	0.0197
HSFB4(HSF)/col-HSFB4-DAP-Seq(GSE60143)/Homer	TTCTAGAAGCTTCTA	1	-0.1952	1	140	0.0027	42.5	0.0031
TCP3(TCP)/colamp-TCP3-DAP-Seq(GSE60143)/Homer	WGTGGTCCCAAHWWW	1	-0.1931	1	1047	0.0199	288.9	0.0212
AT2G01818(PLATZ)/col-AT2G01818-DAP-Seq(GSE60143)/Homer	TCTAGAABSTTC	1	-0.193	1	741	0.0141	206.4	0.0152
BAM8(BES1)/col-BAM8-DAP-Seq(GSE60143)/Homer	NNWSACACGTGTSWN	1	-0.191	1	570	0.0109	160.5	0.0118
bHLH157(bHLH)/col-bHLH157-DAP-Seq(GSE60143)/Homer	KACACGTCTCTY	1	-0.1874	1	599	0.0114	168.8	0.0124
AT3G10030(Trihelix)/colamp-AT3G10030-DAP-Seq(GSE60143)/Homer	GCCGTTAA	1	-0.1853	1	2030	0.0387	550.5	0.0404
MYB113(MYB)/col-MYB113-DAP-Seq(GSE60143)/Homer	HNDAWTCMGTTAYWN	1	-0.1831	1	1660	0.0316	452.6	0.0333
SPCH(bHLH)/Seedling-SPCH-ChIP-Seq(GSE57497)/Homer	WNBCACGTGA	1	-0.1826	1	4562	0.0869	1218.1	0.0895
Max(bHLH)/K562-Max-ChIP-Seq(GSE31477)/Homer	RCCACGTGGYYN	1	-0.1813	1	3228	0.0615	867.8	0.0638
ATY13(MYB)/col-ATY13-DAP-Seq(GSE60143)/Homer	YYYAACYRHH	1	-0.1767	1	16336	0.3112	4295.5	0.3156
LIN-15B(Zf)/cElegans-L3-LIN15B-ChIP-Seq(modEncode)/Homer	CARTGGAGCGCRYTTGCATT	1	-0.1726	1	32	0.0006	11.5	0.0008
Srebp1a(bHLH)/HepG2-Srebp1a-ChIP-Seq(GSE31477)/Homer	RTCACSCCAY	1	-0.172	1	826	0.0157	230.1	0.0169
ZNF41(Zf)/HEK293-ZNF41.GFP-ChIP-Seq(GSE58341)/Homer	CCTCATGGTGYCYTWYTCCCTTGTG	1	-0.1659	1	106	0.002	33.2	0.0024
ANAC092(NAC)/colamp-ANAC092-DAP-Seq(GSE60143)/Homer	WRCKTGWNNNWCAMG	1	-0.1609	1	1211	0.0231	334.6	0.0246
ZNF382(Zf)/HEK293-ZNF382.GFP-ChIP-Seq(GSE58341)/Homer	GNCTGTASTRNTGBCTCHTT	1	-0.1536	1	105	0.002	33.6	0.0025
ATHB7(Homeobox)/col-ATHB7-DAP-Seq(GSE60143)/Homer	AATGATTG	1	-0.1519	1	1838	0.035	502.7	0.0369
AT1G47655(C2C2dof)/colamp-AT1G47655-DAP-Seq(GSE60143)/Homer	YHACTTTTTS	1	-0.1442	1	15947	0.3038	4201.3	0.3087
Tgif2(Homeobox)/mES-Tgif2-ChIP-Seq(GSE55404)/Homer	TGTCANYT	1	-0.1419	1	16494	0.3142	4344.7	0.3192
bHLH18(bHLH)/col-bHLH18-DAP-Seq(GSE60143)/Homer	CACGTGTTYCACGTG	1	-0.1385	1	63	0.0012	21.7	0.0016
ATHB21(HB)/colamp-ATHB21-DAP-Seq(GSE60143)/Homer	YCAATWAT	1	-0.1374	1	1219	0.0232	338.1	0.0248
PLT3(AP2EREBP)/col-PLT3-DAP-Seq(GSE60143)/Homer	GCACGNWTHYCGAGG	1	-0.1359	1	212	0.004	64.6	0.0047
At4g18890(BZR)/col-At4g18890-DAP-Seq(GSE60143)/Homer	NDBRCACGTGYR	1	-0.1252	1	704	0.0134	200.8	0.0148
ZFX(Zf)/mES-Zfx-ChIP-Seq(GSE11431)/Homer	AGGCCTRG	1	-0.1221	1	8506	0.1621	2263.5	0.1663
Unknown2/Drosophila-Promoters/Homer	CATCMCTA	1	-0.1219	1	6147	0.1171	1644.8	0.1208
ELF5(ETS)/T47D-ELF5-ChIP-Seq(GSE30407)/Homer	ACVAGGAAGT	1	-0.1195	1	5157	0.0982	1384.5	0.1017
MYB33(MYB)/col-MYB33-DAP-Seq(GSE60143)/Homer	DDTYNGTTAN	1	-0.1176	1	7103	0.1353	1896.9	0.1394
GT2(Trihelix)/colamp-GT2-DAP-Seq(GSE60143)/Homer	AMGGTAAAWWWN	1	-0.1173	1	3496	0.0666	946.9	0.0696
MYB41(MYB)/col-MYB41-DAP-Seq(GSE60143)/Homer	BYTYACCTAA	1	-0.1148	1	1670	0.0318	461.9	0.0339
AT1G20910(ARID)/col-AT1G20910-DAP-Seq(GSE60143)/Homer	THAATTRAWN	1	-0.1131	1	5088	0.0969	1367.6	0.1005
PQM-1(?)/cElegans-L3-ChIP-Seq(modEncode)/Homer	ACTGATAAGA	1	-0.1101	1	1258	0.024	351.7	0.0258
WRKY28(WRKY)/col-WRKY28-DAP-Seq(GSE60143)/Homer	BGTTGACTWH	1	-0.1086	1	4213	0.0803	1137.1	0.0835
CRC(C2C2YABBY)/col-CRC-DAP-Seq(GSE60143)/Homer	TWATSATA	1	-0.1069	1	3316	0.0632	900.4	0.0662
AR-halfsite(NR)/LNCaP-AR-ChIP-Seq(GSE27824)/Homer	CCAGGAACAG	1	-0.1033	1	20129	0.3835	5301.1	0.3895
Adof1(C2C2dof)/col-Adof1-DAP-Seq(GSE60143)/Homer	NRWAAAGYDV	1	-0.1009	1	11909	0.2269	3159	0.2321
At5g62940(C2C2dof)/col-At5g62940-DAP-Seq(GSE60143)/Homer	WHWHHACTTTTT	1	-0.09904	1	15032	0.2864	3975.7	0.2921
GT3a(Trihelix)/col-GT3a-DAP-Seq(GSE60143)/Homer	WNACACGTGTYWWAW	1	-0.09839	1	431	0.0082	127.9	0.0094
REB1/SacCer-Promoters/Homer	KCCGGGTAAYRR	1	-0.09664	1	663	0.0126	191.5	0.0141
ATHB18(Homeobox)/colamp-ATHB18-DAP-Seq(GSE60143)/Homer	YCAATSATTG	1	-0.09435	1	351	0.0067	105	0.0077
WRKY45(WRKY)/col-WRKY45-DAP-Seq(GSE60143)/Homer	HNNNKTTGACTWWNH	1	-0.09172	1	1084	0.0207	306.5	0.0225
AT3G51470(DBP)/col-AT3G51470-DAP-Seq(GSE60143)/Homer	TTWHGGTGCACC	1	-0.08884	1	6108	0.1164	1641.4	0.1206
OBP1(C2C2dof)/col-OBP1-DAP-Seq(GSE60143)/Homer	NHHACTTTWT	1	-0.08654	1	12064	0.2298	3204.8	0.2355
bZIP:IRF(bZIP,IRF)/Th17-BatF-ChIP-Seq(GSE39756)/Homer	NAGTTTCABTHTGACTNW	1	-0.08478	1	1775	0.0338	493.6	0.0363
E-box(bHLH)/Promoter/Homer	SSGGTCACGTGA	1	-0.08271	1	633	0.0121	184.6	0.0136
MYB44(MYB)/colamp-MYB44-DAP-Seq(GSE60143)/Homer	CVGTTWWKTCNGTTA	1	-0.08233	1	242	0.0046	75.1	0.0055
AT1G28160(AP2EREBP)/colamp-AT1G28160-DAP-Seq(GSE60143)/Homer	GGCGGCGG	1	-0.08218	1	12632	0.2407	3354.3	0.2464
WRKY29(WRKY)/colamp-WRKY29-DAP-Seq(GSE60143)/Homer	MGTTGACTTT	1	-0.08041	1	3437	0.0655	937.7	0.0689
GEI-11(Myb?)/cElegans-L4-GEI11-ChIP-Seq(modEncode)/Homer	CCGACAYYTYACGGG	1	-0.0782	1	372	0.0071	113	0.0083
AT1G24250(Orphan)/col-AT1G24250-DAP-Seq(GSE60143)/Homer	KTDGTTGGTDGTTGG	1	-0.07566	1	1291	0.0246	364.4	0.0268
THRa(NR)/C17.2-THRa-ChIP-Seq(GSE38347)/Homer	GGTCANYTGAGGWCA	1	-0.07563	1	1956	0.0373	544	0.04
Unknown(Homeobox)/Limb-p300-ChIP-Seq/Homer	SSCMATWAAA	1	-0.07464	1	2198	0.0419	608.3	0.0447
SFP1/SacCer-Promoters/Homer	DDAAAAATTTTY	1	-0.07192	1	198	0.0038	64	0.0047
IDD2(C2H2)/colamp-IDD2-DAP-Seq(GSE60143)/Homer	HAVAAAAMGACAAAA	1	-0.06515	1	418	0.008	127	0.0093
ZFP3(Zf)/HEK293-ZFP3.GFP-ChIP-Seq(GSE58341)/Homer	GGGTTTTGAAGGATGARTAGGAGTT	1	-0.06459	1	3	0.0001	3	0.0002
bHLH80(bHLH)/col-bHLH80-DAP-Seq(GSE60143)/Homer	NNNNDCAASTTGHNN	1	-0.0642	1	3611	0.0688	987.1	0.0725
REM16(ABI3VP1)/col-REM16-DAP-Seq(GSE60143)/Homer	DTTTTTSCCGSMAAA	1	-0.06384	1	5	0.0001	3.3	0.0002
PRDM1(Zf)/Hela-PRDM1-ChIP-Seq(GSE31477)/Homer	ACTTTCACTTTC	1	-0.06356	1	2343	0.0446	649.4	0.0477
NGA4(ABI3VP1)/col-NGA4-DAP-Seq(GSE60143)/Homer	TKNTCAGGTG	1	-0.06265	1	16523	0.3148	4378.5	0.3217
EIN3(EIL)/col-EIN3-DAP-Seq(GSE60143)/Homer	ARATTCAATGWATYT	1	-0.06227	1	467	0.0089	140.1	0.0103
At4g36780(BZR)/col-At4g36780-DAP-Seq(GSE60143)/Homer	NNNNNNCACGTGNNN	1	-0.06138	1	1224	0.0233	348.9	0.0256
GATA15(C2C2gata)/col-GATA15-DAP-Seq(GSE60143)/Homer	KATGATCA	1	-0.06112	1	5574	0.1062	1508.4	0.1108
PAX3:FKHR-fusion(Paired,Homeobox)/Rh4-PAX3:FKHR-ChIP-Seq(GSE19063)/Homer	ACCRTGACTAATTNN	1	-0.05991	1	842	0.016	244.5	0.018
Tgif1(Homeobox)/mES-Tgif1-ChIP-Seq(GSE55404)/Homer	YTGWCADY	1	-0.05813	1	15227	0.2901	4043	0.297
PUCHI(AP2EREBP)/colamp-PUCHI-DAP-Seq(GSE60143)/Homer	GCGCCGTY	1	-0.05702	1	6398	0.1219	1727.9	0.127
BZR1(BZR)/col-BZR1-DAP-Seq(GSE60143)/Homer	NNCRCACGTGCG	1	-0.05606	1	429	0.0082	130.1	0.0096
Six2(Homeobox)/NephronProgenitor-Six2-ChIP-Seq(GSE39837)/Homer	GWAAYHTGAKMC	1	-0.05579	1	4389	0.0836	1196.5	0.0879
LMI1(HB)/colamp-LMI1-DAP-Seq(GSE60143)/Homer	AATTATTG	1	-0.05552	1	1519	0.0289	429.9	0.0316
WRKY20(WRKY)/col-WRKY20-DAP-Seq(GSE60143)/Homer	CKTTGACYWD	1	-0.05299	1	2319	0.0442	645.5	0.0474
NFAT(RHD)/Jurkat-NFATC1-ChIP-Seq(Jolma_et_al.)/Homer	ATTTTCCATT	1	-0.05125	1	3252	0.062	895.4	0.0658
IRF1(IRF)/PBMC-IRF1-ChIP-Seq(GSE43036)/Homer	GAAAGTGAAAGT	1	-0.05076	1	656	0.0125	194.1	0.0143
CELF2(RRM)/JSL1-CELF2-CLIP-Seq(GSE71264)/Homer	RGTGTCAG	1	-0.04886	1	1525	0.0291	432.9	0.0318
HAP3(CCAATHAP3)/col-HAP3-DAP-Seq(GSE60143)/Homer	TGATGGAW	1	-0.04815	1	1098	0.0209	316.5	0.0233
MGP(C2H2)/colamp-MGP-DAP-Seq(GSE60143)/Homer	TTTTGTCGTTTW	1	-0.04696	1	784	0.0149	230.4	0.0169
MYB56(MYB)/colamp-MYB56-DAP-Seq(GSE60143)/Homer	HTAACGRMHY	1	-0.04656	1	2992	0.057	827.2	0.0608
DUX4(Homeobox)/Myoblasts-DUX4.V5-ChIP-Seq(GSE75791)/Homer	NWTAAYCYAATCAWN	1	-0.04617	1	95	0.0018	34.6	0.0025
RXR(NR),DR1/3T3L1-RXR-ChIP-Seq(GSE13511)/Homer	TAGGGCAAAGGTCA	1	-0.04488	1	6020	0.1147	1632.4	0.1199
EMB1789(C3H)/col-EMB1789-DAP-Seq(GSE60143)/Homer	TWTTTACCGYND	1	-0.04342	1	1263	0.0241	362.1	0.0266
ATHB6(Homeobox)/col-ATHB6-DAP-Seq(GSE60143)/Homer	AATGATTG	1	-0.03983	1	3485	0.0664	961.9	0.0707
BMAL1(bHLH)/Liver-Bmal1-ChIP-Seq(GSE39860)/Homer	GNCACGTG	1	-0.03966	1	7749	0.1476	2091.8	0.1537
AT5G02460(C2C2dof)/col-AT5G02460-DAP-Seq(GSE60143)/Homer	CHCCTTTT	1	-0.03865	1	9650	0.1838	2592.8	0.1905
At1g78700(BZR)/col-At1g78700-DAP-Seq(GSE60143)/Homer	NNNNCACGTGNNNNN	1	-0.03719	1	1232	0.0235	355	0.0261
ATHB5(HB)/colamp-ATHB5-DAP-Seq(GSE60143)/Homer	AATGATTG	1	-0.03689	1	2235	0.0426	627.7	0.0461
TRP2(MYBrelated)/colamp-TRP2-DAP-Seq(GSE60143)/Homer	TAAACCCT	1	-0.03278	1	688	0.0131	206.7	0.0152
dof45(C2C2dof)/col-dof45-DAP-Seq(GSE60143)/Homer	NVAWAAAGTN	1	-0.03271	1	10343	0.1971	2778.9	0.2042
At4g01280(MYBrelated)/colamp-At4g01280-DAP-Seq(GSE60143)/Homer	AAATATCT	1	-0.0327	1	1385	0.0264	398.8	0.0293
ATHB53(HB)/col-ATHB53-DAP-Seq(GSE60143)/Homer	CAATAATT	1	-0.03211	1	1005	0.0191	294.9	0.0217
SPL11(SBP)/col100-SPL11-DAP-Seq(GSE60143)/Homer	YTGTACTTBH	1	-0.02781	1	2045	0.039	579.1	0.0425
EGL-5(Homeobox)/cElegans-L3-EGL5-ChIP-Seq(modEncode)/Homer	ATTTAATGGG	1	-0.02585	1	5205	0.0992	1426.4	0.1048
bHLH122(bHLH)/col100-bHLH122-DAP-Seq(GSE60143)/Homer	NDDCAASTTGHHNWW	1	-0.02528	1	3296	0.0628	917.1	0.0674
AT2G15740(C2H2)/col-AT2G15740-DAP-Seq(GSE60143)/Homer	DHNDWATCGATD	1	-0.02495	1	1882	0.0359	536.7	0.0394
At1g74840(MYBrelated)/col100-At1g74840-DAP-Seq(GSE60143)/Homer	YHTTATCCAWWT	1	-0.02482	1	2092	0.0399	593.9	0.0436
ERF105(AP2EREBP)/colamp-ERF105-DAP-Seq(GSE60143)/Homer	TGGCGGCT	1	-0.02429	1	9698	0.1848	2615.8	0.1922
TCP20(TCP)/col-TCP20-DAP-Seq(GSE60143)/Homer	GGDCCCAC	1	-0.02086	1	1842	0.0351	527	0.0387
COG1(C2C2dof)/col-COG1-DAP-Seq(GSE60143)/Homer	DAAAAAGTGA	1	-0.01967	1	5673	0.1081	1555.2	0.1143
Barx1(Homeobox)/Stomach-Barx1.3xFlag-ChIP-Seq(GSE69483)/Homer	AAACMATTAN	1	-0.01951	1	1924	0.0367	550.8	0.0405
HSFB3(HSF)/colamp-HSFB3-DAP-Seq(GSE60143)/Homer	TTCTAGAAGMTTHTW	1	-0.01911	1	227	0.0043	77.3	0.0057
RBPJ:Ebox(?,bHLH)/Panc1-Rbpj1-ChIP-Seq(GSE47459)/Homer	GGGRAARRGRMCAGMTG	1	-0.01908	1	1648	0.0314	475.7	0.0349
TCP16(TCP)/colamp-TCP16-DAP-Seq(GSE60143)/Homer	GTGGDCCYNNNNNNN	1	-0.01647	1	3022	0.0576	849.6	0.0624
HOXD13(Homeobox)/Chicken-Hoxd13-ChIP-Seq(GSE38910)/Homer	NCYAATAAAA	1	-0.01586	1	3701	0.0705	1032.6	0.0759
ASHR1(ND)/col-ASHR1-DAP-Seq(GSE60143)/Homer	NTGGTGAN	1	-0.01445	1	6105	0.1163	1675.5	0.1231
Six1(Homeobox)/Myoblast-Six1-ChIP-Chip(GSE20150)/Homer	GKVTCADRTTWC	1	-0.01408	1	1133	0.0216	336.9	0.0248
Bapx1(Homeobox)/VertebralCol-Bapx1-ChIP-Seq(GSE36672)/Homer	TTRAGTGSYK	1	-0.01123	1	9892	0.1885	2682.6	0.1971
ANL2(HB)/col-ANL2-DAP-Seq(GSE60143)/Homer	CATTAATTGC	1	-0.01095	1	1375	0.0262	405.3	0.0298
FOXA1:AR(Forkhead,NR)/LNCAP-AR-ChIP-Seq(GSE27824)/Homer	AGTAAACAAAAAAGAACAND	1	-0.01095	1	184	0.0035	66.3	0.0049
ATHB15(HB)/col-ATHB15-DAP-Seq(GSE60143)/Homer	GYAATSATTA	1	-0.01075	1	712	0.0136	220.9	0.0162
JKD(C2H2)/col-JKD-DAP-Seq(GSE60143)/Homer	TTTTGTCGTTTT	1	-0.01074	1	582	0.0111	183.9	0.0135
DMRT1(DM)/Testis-DMRT1-ChIP-Seq(GSE64892)/Homer	TWGHWACAWTGTWDC	1	-0.0105	1	807	0.0154	247.3	0.0182
PAX5(Paired,Homeobox)/GM12878-PAX5-ChIP-Seq(GSE32465)/Homer	GCAGCCAAGCRTGACH	1	-0.0103	1	2532	0.0482	722.2	0.0531
AGL63(MADS)/col-AGL63-DAP-Seq(GSE60143)/Homer	TTCCAAWWWTGG	1	-0.01029	1	2381	0.0454	681.9	0.0501
CLOCK(bHLH)/Liver-Clock-ChIP-Seq(GSE39860)/Homer	GHCACGTG	1	-0.01002	1	2623	0.05	747.1	0.0549
Ascl1(bHLH)/NeuralTubes-Ascl1-ChIP-Seq(GSE55840)/Homer	NNVVCAGCTGBN	1	-0.009458	1	10816	0.2061	2929.4	0.2152
RLR1?/SacCer-Promoters/Homer	WTTTTCYYTTTT	1	-0.008462	1	2458	0.0468	704.7	0.0518
TATA-box/SacCer-Promoters/Homer	BBHWTATATA	1	-0.00798	1	1290	0.0246	384.2	0.0282
SPL9(SBP)/colamp-SPL9-DAP-Seq(GSE60143)/Homer	BTGTACTT	1	-0.00797	1	8343	0.1589	2279.5	0.1675
ZNF322(Zf)/HEK293-ZNF322.GFP-ChIP-Seq(GSE58341)/Homer	GAGCCTGGTACTGWGCCTGR	1	-0.007419	1	1566	0.0298	461.9	0.0339
AtGRF6(GRF)/col-AtGRF6-DAP-Seq(GSE60143)/Homer	NTGTCAGADNNNNNN	1	-0.007344	1	6372	0.1214	1757.9	0.1292
ATHB13(Homeobox)/col-ATHB13-DAP-Seq(GSE60143)/Homer	CAATAATT	1	-0.0069	1	2531	0.0482	726.3	0.0534
RAP211(AP2EREBP)/colamp-RAP211-DAP-Seq(GSE60143)/Homer	RGCCGGCYWW	1	-0.006752	1	14285	0.2722	3848.8	0.2828
At3g09600(MYBrelated)/colamp-At3g09600-DAP-Seq(GSE60143)/Homer	AAAATATCTT	1	-0.006716	1	1106	0.0211	335	0.0246
AT2G28920(ND)/col-AT2G28920-DAP-Seq(GSE60143)/Homer	WAGATATTTWTW	1	-0.006451	1	562	0.0107	180.9	0.0133
BOS1(MYB)/col-BOS1-DAP-Seq(GSE60143)/Homer	NNRCCTAACT	1	-0.005986	1	4647	0.0885	1299.2	0.0955
GRF9(GRF)/colamp-GRF9-DAP-Seq(GSE60143)/Homer	NWCTGACANNNNNNN	1	-0.005073	1	5284	0.1007	1472.7	0.1082
PLT1(AP2EREBP)/colamp-PLT1-DAP-Seq(GSE60143)/Homer	GCACGAWTYCCGAGG	1	-0.004828	1	286	0.0054	100.7	0.0074
BIM2(bHLH)/col-BIM2-DAP-Seq(GSE60143)/Homer	NNNNCACGTGNN	1	-0.004768	1	3626	0.0691	1027.4	0.0755
Nkx2.5(Homeobox)/HL1-Nkx2.5.biotin-ChIP-Seq(GSE21529)/Homer	RRSCACTYAA	1	-0.004194	1	10909	0.2078	2969.8	0.2182
Tal1	CATCTG	1	-0.00376	1	6705	0.1277	1856.4	0.1364
HDG1(Homeobox)/col100-HDG1-DAP-Seq(GSE60143)/Homer	DDYAATTAATGH	1	-0.003543	1	1347	0.0257	406.5	0.0299
Cux2(Homeobox)/Liver-Cux2-ChIP-Seq(GSE35985)/Homer	HNRAATCAAT	1	-0.003048	1	1101	0.021	338.2	0.0249
EPR1(MYBrelated)/colamp-EPR1-DAP-Seq(GSE60143)/Homer	AAATATCT	1	-0.003015	1	812	0.0155	256.2	0.0188
LHY1(MYBrelated)/col-LHY1-DAP-Seq(GSE60143)/Homer	AAATATCT	1	-0.003015	1	812	0.0155	256.2	0.0188
ERF13(AP2EREBP)/colamp-ERF13-DAP-Seq(GSE60143)/Homer	TYAGCCGCCATT	1	-0.003002	1	7409	0.1412	2047.1	0.1504
NRF(NRF)/Promoter/Homer	STGCGCATGCGC	1	-0.00252	1	1841	0.0351	546	0.0401
AT1G76880(Trihelix)/col-AT1G76880-DAP-Seq(GSE60143)/Homer	ACGGTAAAAW	1	-0.002359	1	1173	0.0223	360.4	0.0265
AT1G04880(ARID)/colamp-AT1G04880-DAP-Seq(GSE60143)/Homer	AAACTATATADTATA	1	-0.002045	1	174	0.0033	68.4	0.005
Pax7(Paired,Homeobox)/Myoblast-Pax7-ChIP-Seq(GSE25064)/Homer	TAATCAATTA	1	-0.001767	1	204	0.0039	78.4	0.0058
PCF/Arabidopsis-Promoters/Homer	NNWWWTGGGCYTDDN	1	-0.001027	1	1007	0.0192	318.7	0.0234
Slug(Zf)/Mesoderm-Snai2-ChIP-Seq(GSE61475)/Homer	SNGCACCTGCHS	1	-0.000707	1	4647	0.0885	1325.8	0.0974
PHV(HB)/col-PHV-DAP-Seq(GSE60143)/Homer	RTAATSATTA	1	-0.000695	1	864	0.0165	279.9	0.0206
NF1-halfsite(CTF)/LNCaP-NF1-ChIP-Seq(Unpublished)/Homer	YTGCCAAG	1	-0.000541	1	9019	0.1718	2501.9	0.1838
PAX6(Paired,Homeobox)/Forebrain-Pax6-ChIP-Seq(GSE66961)/Homer	NGTGTTCAVTSAAGCGKAAA	1	-0.000515	1	348	0.0066	127.3	0.0094
Elk1(ETS)/Hela-Elk1-ChIP-Seq(GSE31477)/Homer	HACTTCCGGY	1	-0.00048	1	5938	0.1131	1678.6	0.1233
SPL15(SBP)/colamp-SPL15-DAP-Seq(GSE60143)/Homer	WDWMMGTACADW	1	-0.000478	1	5115	0.0974	1456.1	0.107
ANAC075(NAC)/col-ANAC075-DAP-Seq(GSE60143)/Homer	CTTSWWNWWSAAGYT	1	-0.000465	1	995	0.019	319.2	0.0235
At5g52660(MYBrelated)/colamp-At5g52660-DAP-Seq(GSE60143)/Homer	HAAAAATATCTW	1	-0.000441	1	1060	0.0202	338.1	0.0248
AT2G31460(REMB3)/col-AT2G31460-DAP-Seq(GSE60143)/Homer	WNWARWDGAAATGAT	1	-0.000372	1	977	0.0186	315.1	0.0231
ZNF711(Zf)/SHSY5Y-ZNF711-ChIP-Seq(GSE20673)/Homer	AGGCCTAG	1	-0.00032	1	12824	0.2443	3518	0.2585
MafB(bZIP)/BMM-Mafb-ChIP-Seq(GSE75722)/Homer	WNTGCTGASTCAGCANWTTY	1	-0.000269	1	3298	0.0628	967.4	0.0711
SND2(NAC)/colamp-SND2-DAP-Seq(GSE60143)/Homer	CTTVWNNNWBAAGNW	1	-0.00025	1	1659	0.0316	512.5	0.0377
ATHB40(HB)/col-ATHB40-DAP-Seq(GSE60143)/Homer	HCAATWATTG	1	-0.00025	1	1808	0.0344	554.6	0.0407
NRF1(NRF)/MCF7-NRF1-ChIP-Seq(Unpublished)/Homer	CTGCGCATGCGC	1	-0.000201	1	1849	0.0352	567.8	0.0417
Nkx2.1(Homeobox)/LungAC-Nkx2.1-ChIP-Seq(GSE43252)/Homer	RSCACTYRAG	1	-0.000156	1	14407	0.2745	3947.9	0.2901
ANAC045(NAC)/col-ANAC045-DAP-Seq(GSE60143)/Homer	DNCKTVNNNNNNAMG	1	-0.000134	1	9525	0.1815	2655.7	0.1951
At5g08330(TCP)/col-At5g08330-DAP-Seq(GSE60143)/Homer	GGRCCCAC	1	-8.5e-05	1	2998	0.0571	894.9	0.0658
AT5G61620(MYBrelated)/colamp-AT5G61620-DAP-Seq(GSE60143)/Homer	CTTATCCA	1	-8.4e-05	1	5301	0.101	1525.1	0.1121
ERF115(AP2EREBP)/colamp-ERF115-DAP-Seq(GSE60143)/Homer	WTKRCGGCGB	1	-6.7e-05	1	10173	0.1938	2837.9	0.2085
AT2G33550(Trihelix)/colamp-AT2G33550-DAP-Seq(GSE60143)/Homer	TTTAAGGGCAYTTTT	1	-5.7e-05	1	8493	0.1618	2390.1	0.1756
ANAC042(NAC)/col-ANAC042-DAP-Seq(GSE60143)/Homer	CGTNDHNDHNACGKY	1	-3.6e-05	1	4023	0.0766	1184.6	0.087
ERF15(AP2EREBP)/colamp-ERF15-DAP-Seq(GSE60143)/Homer	WDHAGCMGCCAT	1	-2.1e-05	1	14335	0.2731	3957.7	0.2908
ZML2(C2C2gata)/col-ZML2-DAP-Seq(GSE60143)/Homer	CATCATCATC	1	-2e-05	1	567	0.0108	206.9	0.0152
Meis1(Homeobox)/MastCells-Meis1-ChIP-Seq(GSE48085)/Homer	VGCTGWCAVB	1	-1.1e-05	1	9385	0.1788	2648.4	0.1946
At1g72010(TCP)/colamp-At1g72010-DAP-Seq(GSE60143)/Homer	GGDCCCAC	1	-1.1e-05	1	2494	0.0475	768.6	0.0565
HNF6(Homeobox)/Liver-Hnf6-ChIP-Seq(ERP000394)/Homer	NTATYGATCH	1	-8e-06	1	1453	0.0277	473.5	0.0348
REM19(REM)/colamp-REM19-DAP-Seq(GSE60143)/Homer	AAAAAAAA	1	-8e-06	1	2655	0.0506	816.9	0.06
LHY(Myb)/Seedling-LHY-ChIP-Seq(GSE52175)/Homer	ADAAATATCT	1	-7e-06	1	2827	0.0539	865.1	0.0636
MafK(bZIP)/C2C12-MafK-ChIP-Seq(GSE36030)/Homer	GCTGASTCAGCA	1	-6e-06	1	2676	0.051	824.4	0.0606
VRN1(ABI3VP1)/col-VRN1-DAP-Seq(GSE60143)/Homer	TTTTTTTTTT	1	-5e-06	1	1256	0.0239	418.6	0.0308
GATA20(C2C2gata)/colamp-GATA20-DAP-Seq(GSE60143)/Homer	TNGATCNDNM	1	-5e-06	1	8548	0.1629	2433.7	0.1788
DMRT6(DM)/Testis-DMRT6-ChIP-Seq(GSE60440)/Homer	YDGHTACAWTGTADC	1	-3e-06	1	696	0.0133	252.1	0.0185
CCA(Myb)/Arabidopsis-CCA.GFP-ChIP-Seq(GSE70533)/Homer	AGATATYTTT	1	-2e-06	1	2313	0.0441	727.2	0.0534
bZIP18(bZIP)/colamp-bZIP18-DAP-Seq(GSE60143)/Homer	KGMCAGCTND	1	-1e-06	1	31367	0.5976	8433.9	0.6197
CEBP(bZIP)/ThioMac-CEBPb-ChIP-Seq(GSE21512)/Homer	ATTGCGCAAC	1	-1e-06	1	2410	0.0459	759	0.0558
MyoG(bHLH)/C2C12-MyoG-ChIP-Seq(GSE36024)/Homer	AACAGCTG	1	-1e-06	1	7295	0.139	2110.9	0.1551
SPL1(SBP)/colamp-SPL1-DAP-Seq(GSE60143)/Homer	HYGTACDTWH	1	0	1	6325	0.1205	1861.4	0.1368
E2A(bHLH),near_PU.1/Bcell-PU.1-ChIP-Seq(GSE21512)/Homer	NVCACCTGBN	1	0	1	9989	0.1903	2860.4	0.2102
At5g47390(MYBrelated)/col-At5g47390-DAP-Seq(GSE60143)/Homer	CTTATCCA	1	0	1	4501	0.0858	1370.4	0.1007
At1g19210(AP2EREBP)/colamp-At1g19210-DAP-Seq(GSE60143)/Homer	HCACCGACCAHN	1	0	1	6223	0.1186	1855.9	0.1364
NFY(CCAAT)/Promoter/Homer	RGCCAATSRG	1	0	1	4530	0.0863	1391.1	0.1022
AT3G10113(MYBrelated)/col-AT3G10113-DAP-Seq(GSE60143)/Homer	WNAAATATCWWN	1	0	1	978	0.0186	370.9	0.0272
IBL1(bHLH)/Seedling-IBL1-ChIP-Seq(GSE51120)/Homer	CACGTGCC	1	0	1	10504	0.2001	3053.6	0.2244
NPAS2(bHLH)/Liver-NPAS2-ChIP-Seq(GSE39860)/Homer	KCCACGTGAC	1	0	1	5620	0.1071	1719.7	0.1263
ZBTB12(Zf)/HEK293-ZBTB12.GFP-ChIP-Seq(GSE58341)/Homer	NGNTCTAGAACCNGV	1	0	1	2747	0.0523	979	0.0719
RVE1(MYBrelated)/col-RVE1-DAP-Seq(GSE60143)/Homer	AAATATCT	1	0	1	1292	0.0246	483.4	0.0355
YY1(Zf)/Promoter/Homer	CAAGATGGCGGC	1	0	1	1543	0.0294	629.9	0.0463
HLH-1(bHLH)/cElegans-Embryo-HLH1-ChIP-Seq(modEncode)/Homer	RACAGCTGTTBH	1	0	1	4806	0.0916	1520.4	0.1117
PRDM14(Zf)/H1-PRDM14-ChIP-Seq(GSE22767)/Homer	RGGTCTCTAACY	1	0	1	1473	0.0281	548.9	0.0403
SEP3(MADS)/Arabidoposis-Flower-Sep3-ChIP-Seq/Homer	CCAAAAAGGG	1	0	1	4783	0.0911	1509.8	0.1109
Ik-1	NHTTGGGAATRCC	1	0	1	52489	1	13610.6	1

## Sheet: Figure 4-figure supplement 1D
Distance from Center (cmd=annotatePeaks.pl Yap1FB19rep1_peaks.xls mm9 -size 4000 -hist 25 -m tead4.motif zic3.motif junb.motif fra1.motif jun-ap1.motif esrrb.motif)	TEAD4(TEA)/Tropoblast-Tead4-ChIP-Seq(GSE37350)/Homer total sites	Zic3(Zf)/mES-Zic3-ChIP-Seq(GSE37889)/Homer total sites	JunB(bZIP)/DendriticCells-Junb-ChIP-Seq(GSE36099)/Homer total sites	Fra1(bZIP)/BT549-Fra1-ChIP-Seq(GSE46166)/Homer total sites	Jun-AP1(bZIP)/K562-cJun-ChIP-Seq(GSE31477)/Homer total sites	Esrrb(NR)/mES-Esrrb-ChIP-Seq(GSE11431)/Homer total sites
-2000	0.000150094	6.00375e-05	0.000195122	0.000195122	3.00188e-05	9.00563e-05
-1975	0.000510319	0.000150094	0.000300188	0.000360225	0.000105066	0.0004803
-1950	0.000465291	0.000210131	0.000315197	0.000450281	0.000180113	0.000405253
-1925	0.0004803	0.000210131	0.000345216	0.000375235	0.000150094	0.000375235
-1900	0.000450281	0.000210131	0.000585366	0.00049531	0.000285178	0.000360225
-1875	0.000630394	0.000285178	0.000630394	0.000555347	0.000135084	0.000360225
-1850	0.00049531	0.000165103	0.000390244	0.000450281	0.000135084	0.000330206
-1825	0.000345216	0.000165103	0.000465291	0.000525328	0.000300188	0.000390244
-1800	0.000450281	0.000150094	0.000525328	0.000585366	0.000180113	0.000315197
-1775	0.0004803	0.000165103	0.000525328	0.000555347	0.000210131	0.000210131
-1750	0.000420263	0.000225141	0.000570356	0.000540338	0.000150094	0.000375235
-1725	0.000450281	0.00024015	0.000555347	0.000675422	0.00024015	0.000285178
-1700	0.000510319	0.000225141	0.00049531	0.000555347	0.000210131	0.000270169
-1675	0.000420263	0.000165103	0.000375235	0.000345216	9.00563e-05	0.000390244
-1650	0.000405253	0.000195122	0.000600375	0.000690432	0.000315197	0.000375235
-1625	0.000405253	0.000210131	0.000345216	0.000465291	0.000195122	0.000360225
-1600	0.00049531	0.000105066	0.000510319	0.000555347	0.000150094	0.000375235
-1575	0.000660413	0.000210131	0.000420263	0.000465291	0.000210131	0.000390244
-1550	0.000420263	0.000225141	0.000405253	0.0004803	0.000180113	0.00024015
-1525	0.000435272	0.000270169	0.000555347	0.000555347	0.000300188	0.000345216
-1500	0.000345216	0.000195122	0.000345216	0.000420263	0.000210131	0.000360225
-1475	0.000345216	0.000180113	0.000405253	0.000450281	0.000150094	0.000300188
-1450	0.000600375	0.000195122	0.000270169	0.000300188	4.50281e-05	0.000270169
-1425	0.000450281	0.000165103	0.000465291	0.000405253	0.000255159	0.000345216
-1400	0.000360225	0.000225141	0.000270169	0.000285178	4.50281e-05	0.000315197
-1375	0.000465291	0.000105066	0.000345216	0.000330206	0.000135084	0.00024015
-1350	0.000450281	0.000135084	0.000600375	0.000675422	0.000210131	0.000360225
-1325	0.000405253	0.000210131	0.000300188	0.000405253	0.000195122	0.000315197
-1300	0.000450281	0.00024015	0.000570356	0.00072045	0.000225141	0.000300188
-1275	0.000420263	0.000120075	0.000465291	0.000360225	0.000195122	0.000405253
-1250	0.00049531	0.000120075	0.000420263	0.000330206	0.000210131	0.00024015
-1225	0.000405253	0.000165103	0.00049531	0.000630394	0.000120075	0.000420263
-1200	0.000555347	0.000225141	0.0004803	0.00049531	0.00024015	0.000195122
-1175	0.000570356	0.000120075	0.000360225	0.000375235	0.000120075	0.000360225
-1150	0.000570356	0.000180113	0.000270169	0.000390244	0.000150094	0.000375235
-1125	0.00049531	9.00563e-05	0.000390244	0.000570356	0.000180113	0.000345216
-1100	0.000615385	0.000285178	0.000420263	0.000405253	0.000150094	0.000390244
-1075	0.000390244	0.000150094	0.000555347	0.000600375	0.000195122	0.000405253
-1050	0.000570356	0.000180113	0.000420263	0.000465291	0.000195122	0.000375235
-1025	0.000450281	0.000195122	0.000435272	0.000405253	0.000180113	0.000315197
-1000	0.000405253	0.00024015	0.000600375	0.000585366	0.000255159	0.00024015
-975	0.000510319	0.000120075	0.000450281	0.0004803	0.000120075	0.000450281
-950	0.000525328	0.000225141	0.000555347	0.00072045	0.000270169	0.000315197
-925	0.000525328	0.000225141	0.000450281	0.000540338	0.000195122	0.000435272
-900	0.000405253	0.000165103	0.000465291	0.000450281	0.00024015	0.000420263
-875	0.000585366	0.000180113	0.000270169	0.000300188	0.000165103	0.000330206
-850	0.000270169	0.000225141	0.000540338	0.000570356	0.000225141	0.000375235
-825	0.000435272	0.000150094	0.000255159	0.000315197	0.000150094	0.000285178
-800	0.00049531	0.00024015	0.000510319	0.000630394	0.000150094	0.000390244
-775	0.000390244	0.00024015	0.000525328	0.000645403	0.000285178	0.000345216
-750	0.000360225	0.000150094	0.000330206	0.000360225	0.000135084	0.000165103
-725	0.000360225	0.000210131	0.000300188	0.000315197	7.50469e-05	0.000285178
-700	0.000345216	0.00024015	0.000300188	0.000345216	0.000120075	0.000405253
-675	0.000450281	0.000285178	0.000270169	0.000330206	4.50281e-05	0.000315197
-650	0.000555347	0.000210131	0.000585366	0.000525328	0.000345216	0.000285178
-625	0.000405253	0.000225141	0.000690432	0.000705441	0.000315197	0.000255159
-600	0.000510319	0.000270169	0.000435272	0.00049531	0.000210131	0.000330206
-575	0.000525328	0.000270169	0.000420263	0.000405253	0.00024015	0.000315197
-550	0.000630394	0.000210131	0.000420263	0.000465291	0.000165103	0.000315197
-525	0.000585366	0.000255159	0.000375235	0.000405253	0.000135084	0.000345216
-500	0.000510319	0.000180113	0.000705441	0.000705441	0.000300188	0.000300188
-475	0.000435272	0.000135084	0.000615385	0.000570356	0.000180113	0.000300188
-450	0.000435272	0.000375235	0.000570356	0.000615385	0.000255159	0.000270169
-425	0.00049531	0.000120075	0.000210131	0.000195122	0.000135084	0.000270169
-400	0.000345216	0.000285178	0.000615385	0.000600375	0.000300188	0.000435272
-375	0.000360225	0.000210131	0.000825516	0.000690432	0.000150094	0.00024015
-350	0.000555347	0.000255159	0.000405253	0.000450281	9.00563e-05	0.000135084
-325	0.000630394	9.00563e-05	0.0004803	0.0004803	9.00563e-05	0.000420263
-300	0.000630394	0.000105066	9.00563e-05	9.00563e-05	6.00375e-05	0.000255159
-275	0.000765478	0.00024015	0.000285178	0.000270169	7.50469e-05	0.000315197
-250	0.000645403	0.000270169	0.000330206	0.000315197	0.000180113	0.000195122
-225	0.000540338	0.000345216	0.000510319	0.000555347	0.000255159	0.000390244
-200	0.000630394	0.000315197	0.000525328	0.000510319	0.000270169	0.000270169
-175	0.000795497	0.000255159	0.000345216	0.000375235	0.000150094	0.000375235
-150	0.000870544	0.000420263	0.0004803	0.000615385	0.000180113	0.000345216
-125	0.00109568	0.000360225	0.000945591	0.00105066	0.000585366	0.000450281
-100	0.00151595	0.000585366	0.000660413	0.000690432	0.00049531	0.0004803
-75	0.00225141	0.000765478	0.00136585	0.00129081	0.000825516	0.000420263
-50	0.0039925	0.000945591	0.000945591	0.00097561	0.000600375	0.000345216
-25	0.00577861	0.00148593	0.00190619	0.0019212	0.00117073	0.000300188
0	0.00673921	0.00159099	0.00154597	0.00162101	0.000915572	0.000225141
25	0.00562852	0.00163602	0.0014409	0.00148593	0.0011257	0.000360225
50	0.00393246	0.00115572	0.0011257	0.00115572	0.000525328	0.000405253
75	0.00220638	0.000750469	0.0011257	0.00121576	0.000690432	0.000405253
100	0.00153096	0.000660413	0.000645403	0.000675422	0.000345216	0.000375235
125	0.00115572	0.000360225	0.000585366	0.000540338	0.000345216	0.000270169
150	0.000870544	0.000300188	0.000540338	0.000555347	0.000300188	0.000300188
175	0.000885553	0.00024015	0.000390244	0.000420263	0.000195122	0.000390244
200	0.000645403	0.00024015	0.000570356	0.000615385	0.000270169	0.000315197
225	0.000765478	0.000315197	0.000285178	0.000330206	0.000105066	0.000255159
250	0.000660413	0.000300188	0.000285178	0.000390244	9.00563e-05	0.000315197
275	0.000675422	0.00024015	0.000285178	0.000345216	4.50281e-05	0.000390244
300	0.000600375	0.000195122	0.000465291	0.0004803	0.000135084	0.000225141
325	0.000540338	0.000270169	0.000420263	0.000405253	0.000165103	0.000300188
350	0.000615385	0.000150094	0.0004803	0.000585366	0.000270169	0.00024015
375	0.000510319	0.000285178	0.0004803	0.000585366	0.000135084	0.000345216
400	0.00049531	0.000225141	0.000405253	0.00049531	0.000165103	0.000315197
425	0.0004803	0.000120075	0.000615385	0.000630394	0.000180113	0.000360225
450	0.000390244	0.000285178	0.000645403	0.00073546	0.000255159	0.000285178
475	0.000525328	0.000225141	0.000390244	0.000435272	0.000150094	0.000360225
500	0.000510319	0.000300188	0.000600375	0.000675422	0.000180113	0.000390244
525	0.000405253	0.000210131	0.000570356	0.000675422	0.000270169	0.000420263
550	0.000540338	0.000180113	0.000225141	0.00024015	7.50469e-05	0.000330206
575	0.000570356	0.000210131	0.000570356	0.00049531	0.000210131	0.000255159
600	0.000570356	0.000210131	0.000405253	0.000300188	0.000150094	0.000255159
625	0.000390244	0.00024015	0.0004803	0.0004803	0.000165103	0.000330206
650	0.000435272	0.00024015	0.000465291	0.00049531	0.000270169	0.000330206
675	0.000525328	0.000165103	0.0004803	0.000510319	0.000195122	0.000270169
700	0.0004803	0.000195122	0.000690432	0.000705441	0.000315197	0.000360225
725	0.000375235	0.000150094	0.000555347	0.00049531	0.00024015	0.000375235
750	0.00049531	0.00024015	0.000315197	0.000345216	0.000150094	0.000225141
775	0.000630394	0.000300188	0.000345216	0.000315197	4.50281e-05	0.000300188
800	0.000510319	0.000255159	0.000690432	0.000765478	0.000285178	0.000285178
825	0.000435272	0.00024015	0.000510319	0.000570356	0.00024015	0.000360225
850	0.000450281	0.000180113	0.000390244	0.0004803	0.000105066	0.000420263
875	0.000465291	0.000180113	0.000405253	0.000405253	0.000150094	0.000345216
900	0.00049531	0.000165103	0.000525328	0.000630394	0.000270169	0.000375235
925	0.000570356	0.000300188	0.000330206	0.000390244	0.000150094	0.000360225
950	0.000375235	0.000180113	0.000405253	0.000450281	0.000120075	0.000300188
975	0.000465291	0.000255159	0.000525328	0.00049531	0.00024015	0.000435272
1000	0.000645403	0.000225141	0.000405253	0.000390244	0.000180113	0.000345216
1025	0.000465291	0.000255159	0.000630394	0.000600375	0.000300188	0.000285178
1050	0.000435272	0.000210131	0.0004803	0.000450281	7.50469e-05	0.000360225
1075	0.000600375	6.00375e-05	0.000390244	0.000330206	0.000150094	0.00024015
1100	0.000585366	0.000225141	0.000390244	0.000360225	0.000150094	0.000390244
1125	0.000420263	0.000210131	0.000570356	0.000525328	0.000300188	0.000330206
1150	0.000465291	0.000195122	0.000600375	0.000690432	0.000255159	0.000150094
1175	0.000615385	0.000120075	0.000570356	0.000630394	0.000285178	0.000465291
1200	0.000555347	0.000180113	0.000615385	0.000630394	0.000255159	0.00024015
1225	0.000420263	0.000255159	0.000225141	0.000255159	1.50094e-05	0.000285178
1250	0.000375235	0.000270169	0.000405253	0.000555347	0.00024015	0.000300188
1275	0.000390244	0.000210131	0.000585366	0.00049531	0.000285178	0.000345216
1300	0.000330206	0.000195122	0.000360225	0.0004803	0.000195122	0.000450281
1325	0.000405253	0.000210131	0.000435272	0.000450281	0.000135084	0.000420263
1350	0.000345216	0.000270169	0.000375235	0.000375235	0.000105066	0.000270169
1375	0.000525328	0.000225141	0.000510319	0.000510319	0.00024015	0.000210131
1400	0.000360225	0.00024015	0.000330206	0.000300188	0.000180113	0.000420263
1425	0.000450281	0.000165103	0.000555347	0.000510319	0.000195122	0.000315197
1450	0.000390244	0.000150094	0.000390244	0.000330206	9.00563e-05	0.000465291
1475	0.000540338	0.000135084	0.000450281	0.000600375	0.000255159	0.000375235
1500	0.000510319	0.000210131	0.000450281	0.000420263	0.000195122	0.00024015
1525	0.000525328	0.000165103	0.000510319	0.000570356	0.000135084	0.000375235
1550	0.000375235	0.000165103	0.000615385	0.000705441	0.000150094	0.000270169
1575	0.000510319	0.000135084	0.0004803	0.00049531	0.000120075	0.000330206
1600	0.000420263	0.000345216	0.000525328	0.000555347	0.000210131	0.000330206
1625	0.000525328	0.000120075	0.000390244	0.000525328	0.000135084	0.000315197
1650	0.000525328	0.000165103	0.00049531	0.000540338	0.000120075	0.000315197
1675	0.000465291	0.00024015	0.0004803	0.000525328	0.000300188	0.000345216
1700	0.000435272	0.000180113	0.000345216	0.000345216	0.000180113	0.000285178
1725	0.000375235	0.00024015	0.000375235	0.000465291	9.00563e-05	0.000360225
1750	0.000465291	0.000150094	0.000540338	0.000585366	0.000195122	0.000405253
1775	0.000420263	0.000165103	0.000450281	0.000465291	0.000150094	0.000405253
1800	0.0004803	0.000150094	0.000510319	0.000600375	0.000255159	0.000360225
1825	0.000420263	0.000225141	0.000285178	0.000330206	3.00188e-05	0.00024015
1850	0.000630394	0.000210131	0.000285178	0.000255159	9.00563e-05	0.000405253
1875	0.000510319	0.000195122	0.000450281	0.000525328	0.000150094	0.000315197
1900	0.00049531	0.000255159	0.00049531	0.000465291	0.000165103	0.000420263
1925	0.000600375	0.00024015	0.000300188	0.000375235	4.50281e-05	0.000330206
1950	0.000405253	0.000180113	0.000630394	0.000660413	0.000405253	0.000300188
1975	0.000525328	7.50469e-05	0.000435272	0.0004803	0.000165103	0.000450281
2000	0.000165103	9.00563e-05	0.000180113	0.000105066	4.50281e-05	0.000165103

## Sheet: Figure 4-figure supplement 1E
Distance from Center (cmd=annotatePeaks.pl Yap1FB19rep1_peaks.xls mm9 -size 4000 -hist 25 -p p300_ESC_rep2_peaks.xls p300_EpiLC_plusActivin_peaks.xls p300_EpiLC_minusActivin_peaks.xls FAIRE_ESC_peaks.xls FAIRE_EpiLC_peaks.xls H3K27ac_ESC_rep2_peaks.xls H3K27ac_EpiLC_plusActivin_peaks.xls H3K27ac_EpiLC_minusActivin_peaks.xls)	p300_ESC_rep2_peaks.xls	p300_EpiLC_minusActivin_peaks.xls	H3K27ac_ESC_rep2_peaks.xls	H3K27ac_EpiLC_minusActivin_peaks.xls
-2000	1.50094e-05	4.50281e-05	3.00188e-05	7.50469e-05
-1975	1.50094e-05	0.000105066	3.00188e-05	3.00188e-05
-1950	3.00188e-05	0.000165103	7.50469e-05	3.00188e-05
-1925	3.00188e-05	6.00375e-05	6.00375e-05	0.000135084
-1900	6.00375e-05	6.00375e-05	0.000165103	0.000105066
-1875	3.00188e-05	0.000135084	4.50281e-05	7.50469e-05
-1850	0	6.00375e-05	3.00188e-05	6.00375e-05
-1825	0	0.000105066	9.00563e-05	6.00375e-05
-1800	3.00188e-05	6.00375e-05	0.000120075	7.50469e-05
-1775	1.50094e-05	0.000105066	7.50469e-05	9.00563e-05
-1750	3.00188e-05	0.000135084	4.50281e-05	4.50281e-05
-1725	0	3.00188e-05	0.000165103	0.000105066
-1700	1.50094e-05	0.000120075	7.50469e-05	0.000120075
-1675	0	0.000120075	6.00375e-05	0.000105066
-1650	0	0.000105066	4.50281e-05	0.000120075
-1625	4.50281e-05	6.00375e-05	0.000105066	0.000120075
-1600	1.50094e-05	6.00375e-05	7.50469e-05	0.000135084
-1575	4.50281e-05	0.000120075	0.000150094	0.000105066
-1550	1.50094e-05	4.50281e-05	0.000120075	0.000105066
-1525	1.50094e-05	9.00563e-05	3.00188e-05	0.000165103
-1500	6.00375e-05	7.50469e-05	6.00375e-05	7.50469e-05
-1475	4.50281e-05	7.50469e-05	9.00563e-05	1.50094e-05
-1450	3.00188e-05	7.50469e-05	0.000135084	4.50281e-05
-1425	4.50281e-05	0.000105066	6.00375e-05	1.50094e-05
-1400	0	7.50469e-05	0.000105066	0.000120075
-1375	4.50281e-05	0.000105066	7.50469e-05	6.00375e-05
-1350	1.50094e-05	6.00375e-05	9.00563e-05	0.000120075
-1325	7.50469e-05	7.50469e-05	0.000120075	0.000120075
-1300	1.50094e-05	0.000165103	0.000135084	0.000105066
-1275	6.00375e-05	0.000120075	6.00375e-05	6.00375e-05
-1250	1.50094e-05	0.000135084	9.00563e-05	9.00563e-05
-1225	0	0.000135084	4.50281e-05	0.000105066
-1200	0	9.00563e-05	6.00375e-05	7.50469e-05
-1175	3.00188e-05	9.00563e-05	0.000165103	9.00563e-05
-1150	0.000120075	0.000165103	1.50094e-05	7.50469e-05
-1125	0.000105066	0.000165103	9.00563e-05	1.50094e-05
-1100	6.00375e-05	0.000135084	0.000120075	6.00375e-05
-1075	6.00375e-05	0.000105066	4.50281e-05	0.000120075
-1050	6.00375e-05	0.000165103	0.000105066	6.00375e-05
-1025	4.50281e-05	0.000135084	0.000105066	0.000120075
-1000	0	7.50469e-05	0.000105066	9.00563e-05
-975	3.00188e-05	0.000180113	0.000150094	9.00563e-05
-950	4.50281e-05	0.000150094	7.50469e-05	0.000105066
-925	1.50094e-05	0.000195122	0.000135084	7.50469e-05
-900	7.50469e-05	0.000180113	0.000135084	0.000105066
-875	3.00188e-05	9.00563e-05	0.000120075	0.000120075
-850	3.00188e-05	0.000135084	0.000120075	0.000135084
-825	6.00375e-05	0.000150094	4.50281e-05	0.000165103
-800	6.00375e-05	0.000105066	9.00563e-05	9.00563e-05
-775	4.50281e-05	0.000150094	0.000120075	0.000165103
-750	3.00188e-05	0.000120075	0.000135084	0.000255159
-725	9.00563e-05	0.000135084	0.000105066	0.000135084
-700	0	0.000195122	0.000255159	0.000135084
-675	4.50281e-05	7.50469e-05	0.000165103	0.000120075
-650	7.50469e-05	0.000135084	0.00024015	0.000105066
-625	6.00375e-05	0.000120075	0.00024015	0.000105066
-600	4.50281e-05	0.000150094	0.000210131	0.000165103
-575	4.50281e-05	0.000150094	0.000165103	0.000165103
-550	3.00188e-05	0.000105066	0.000165103	0.000210131
-525	1.50094e-05	0.000135084	0.000285178	0.00024015
-500	4.50281e-05	0.000150094	0.000225141	0.000360225
-475	1.50094e-05	0.000120075	0.000330206	0.000255159
-450	6.00375e-05	0.000120075	0.000300188	0.000345216
-425	4.50281e-05	7.50469e-05	0.000345216	0.000315197
-400	1.50094e-05	0.000195122	0.000375235	0.000390244
-375	4.50281e-05	7.50469e-05	0.000405253	0.000375235
-350	4.50281e-05	0.000165103	0.00049531	0.000615385
-325	7.50469e-05	9.00563e-05	0.00049531	0.000705441
-300	4.50281e-05	0.000150094	0.000555347	0.000540338
-275	3.00188e-05	0.000225141	0.000645403	0.00073546
-250	7.50469e-05	0.000225141	0.000345216	0.00073546
-225	0.000120075	0.00049531	0.000540338	0.000765478
-200	0.000210131	0.00024015	0.000435272	0.000870544
-175	0.000195122	0.0004803	0.000390244	0.000585366
-150	0.000270169	0.000705441	0.000345216	0.000840525
-125	0.000375235	0.000600375	0.000285178	0.000645403
-100	0.000525328	0.0011257	0.000300188	0.000570356
-75	0.000930582	0.00162101	0.000435272	0.000540338
-50	0.00114071	0.00222139	0.000420263	0.000690432
-25	0.00139587	0.00306191	0.000225141	0.000510319
0	0.00153096	0.00298687	0.000435272	0.000615385
25	0.00130582	0.003197	0.000525328	0.000510319
50	0.000915572	0.00220638	0.000300188	0.000690432
75	0.000855535	0.00157598	0.00049531	0.000630394
100	0.000540338	0.00129081	0.000405253	0.000510319
125	0.000405253	0.00124578	0.000420263	0.000555347
150	0.000285178	0.000630394	0.000270169	0.000705441
175	0.000150094	0.000375235	0.000345216	0.000585366
200	0.000120075	0.000345216	0.000465291	0.000750469
225	0.000150094	0.000210131	0.000435272	0.000615385
250	3.00188e-05	0.000180113	0.000450281	0.00072045
275	4.50281e-05	0.000225141	0.000435272	0.000630394
300	9.00563e-05	0.000180113	0.000345216	0.000630394
325	0.000120075	0.000165103	0.000315197	0.000540338
350	6.00375e-05	7.50469e-05	0.000420263	0.000375235
375	3.00188e-05	0.000120075	0.000450281	0.000540338
400	3.00188e-05	4.50281e-05	0.000435272	0.000435272
425	3.00188e-05	0.000105066	0.000285178	0.0004803
450	3.00188e-05	6.00375e-05	0.000405253	0.000405253
475	3.00188e-05	9.00563e-05	0.000375235	0.000405253
500	1.50094e-05	0.000120075	0.000180113	0.00024015
525	3.00188e-05	4.50281e-05	0.00024015	0.000255159
550	6.00375e-05	0.000105066	0.000195122	0.000195122
575	6.00375e-05	9.00563e-05	0.000255159	0.000195122
600	3.00188e-05	9.00563e-05	0.000180113	0.000180113
625	6.00375e-05	0.000120075	0.000195122	0.000165103
650	0	0.000165103	9.00563e-05	0.000120075
675	3.00188e-05	0.000105066	0.000150094	0.000195122
700	3.00188e-05	0.000210131	0.000105066	0.000165103
725	0	0.000135084	0.000150094	0.000135084
750	7.50469e-05	0.000165103	0.000135084	0.000120075
775	7.50469e-05	0.000165103	6.00375e-05	0.000165103
800	9.00563e-05	0.000150094	3.00188e-05	7.50469e-05
825	6.00375e-05	0.000210131	0.000120075	0.000165103
850	3.00188e-05	0.000120075	4.50281e-05	0.000105066
875	6.00375e-05	0.000150094	0.000150094	0.000120075
900	3.00188e-05	0.000120075	9.00563e-05	6.00375e-05
925	4.50281e-05	0.000195122	0.000120075	0.000105066
950	7.50469e-05	0.000165103	9.00563e-05	0.000150094
975	3.00188e-05	0.000180113	7.50469e-05	7.50469e-05
1000	4.50281e-05	0.000105066	0.000135084	6.00375e-05
1025	4.50281e-05	9.00563e-05	0.000120075	0.000150094
1050	4.50281e-05	0.000120075	6.00375e-05	7.50469e-05
1075	6.00375e-05	0.000135084	7.50469e-05	9.00563e-05
1100	0.000105066	9.00563e-05	7.50469e-05	0.000120075
1125	4.50281e-05	0.000165103	0.000120075	0.000105066
1150	1.50094e-05	0.000150094	0.000135084	0.000105066
1175	6.00375e-05	0.000135084	9.00563e-05	0.000180113
1200	3.00188e-05	0.000150094	9.00563e-05	0.000120075
1225	1.50094e-05	0.000165103	4.50281e-05	0.000135084
1250	4.50281e-05	7.50469e-05	1.50094e-05	0.000105066
1275	3.00188e-05	3.00188e-05	7.50469e-05	7.50469e-05
1300	4.50281e-05	0.000120075	6.00375e-05	0.000120075
1325	6.00375e-05	0.000135084	0.000105066	0.000180113
1350	0.000105066	0.000135084	0.000105066	7.50469e-05
1375	3.00188e-05	0.000120075	0.000105066	0.000165103
1400	6.00375e-05	0.000105066	0.000120075	4.50281e-05
1425	0	9.00563e-05	0.000120075	7.50469e-05
1450	1.50094e-05	6.00375e-05	3.00188e-05	0.000120075
1475	4.50281e-05	4.50281e-05	9.00563e-05	0.000150094
1500	1.50094e-05	0.000150094	3.00188e-05	4.50281e-05
1525	1.50094e-05	0.000105066	9.00563e-05	7.50469e-05
1550	1.50094e-05	0.000120075	0.000120075	0.00024015
1575	1.50094e-05	0.000135084	7.50469e-05	4.50281e-05
1600	3.00188e-05	7.50469e-05	0.000120075	9.00563e-05
1625	6.00375e-05	0.000105066	6.00375e-05	0.000135084
1650	1.50094e-05	0.000120075	6.00375e-05	0.000105066
1675	3.00188e-05	7.50469e-05	7.50469e-05	0.000150094
1700	6.00375e-05	0.000210131	0.000135084	7.50469e-05
1725	4.50281e-05	0.000135084	9.00563e-05	0.000135084
1750	1.50094e-05	0.000135084	6.00375e-05	0.000135084
1775	3.00188e-05	0.000120075	9.00563e-05	7.50469e-05
1800	0	9.00563e-05	9.00563e-05	9.00563e-05
1825	4.50281e-05	0.000180113	6.00375e-05	9.00563e-05
1850	0	4.50281e-05	3.00188e-05	4.50281e-05
1875	1.50094e-05	0.000120075	7.50469e-05	9.00563e-05
1900	4.50281e-05	6.00375e-05	7.50469e-05	6.00375e-05
1925	3.00188e-05	6.00375e-05	6.00375e-05	7.50469e-05
1950	3.00188e-05	6.00375e-05	9.00563e-05	0.000105066
1975	3.00188e-05	9.00563e-05	9.00563e-05	7.50469e-05
2000	1.50094e-05	6.00375e-05	7.50469e-05	7.50469e-05

## Sheet: Figure 4-figure supplement 1I
SF268		NCI-H2052		IMR90		MDA-MB-231			Apoptosis Genes	SF268	NCI-H2052	IMR90	MDA-MB-231
Beta Minus Target Prediction Score	GeneSymbol	Beta Minus Target Prediction Score	GeneSymbol	Beta Minus Target Prediction Score	GeneSymbol	Beta Minus Target Prediction Score	GeneSymbol		PAX7	0.562	0.074	0.074	0.273
3.041	LOC102723769	2.313	AARD	4.01	LINC01566	5.066	LOC102723769		MAPK9	0	0	0	0
2.5	LOC100996324	2.122	LYG2	3.992	LINC01566	4.04	LINC01566		MAPK8	0.134	0.134	0.134	0.46
2.496	MICAL2	2.082	MIR6131	3.211	LOC102723769	4.022	LINC01566		MAP4K5	0.285	0	0	0
2.496	MICAL2	2.008	ETS1	2.26	TRIM9	2.611	HIST1H3B		MAP4K4	0	0.751	0.684	0
2.487	TMEM123	1.954	LINC01139	2.26	TRIM9	2.597	HIST1H2AB		MAP4K3	0.477	0.429	0.981	0.431
2.4	MIR6124	1.938	SLC30A8	2.221	SLC2A2	2.52	HIST1H3C		MAP4K2	0.241	0.241	0	0.224
2.396	MROH2A	1.918	SLC30A8	2.221	SLC2A2	2.499	HIST1H2BB		MAP4K1	0	0.335	0.184	0.183
2.322	SPEN	1.918	SLC30A8	2.221	SLC2A2	2.451	USE1		MAP3K8	0.144	0.467	0.555	0.121
2.321	UQCRHL	1.889	LINC01118	2.132	RUVBL1-AS1	2.388	CRHR1-IT1		MAP3K5	0	0	0	0
2.314	FLJ37453	1.881	OSMR-AS1	2.053	SEC61A1	2.388	CRHR1-IT1		MAP3K4	0	1.222	0	0.084
2.237	LINC01488	1.88	OSMR	1.993	MIR4423	2.387	HIST1H4B		MAP3K3	0.035	0.108	0.109	0
2.237	LINC01488	1.877	OSMR	1.91	G6PC	2.356	MICAL2		MAP3K2	0	0	0	0
2.237	LINC01488	1.855	TTC12	1.91	G6PC	2.356	MICAL2		MAP3K14	0.217	0	0.16	0.34
2.237	LINC01488	1.832	LOC101929412	1.894	LINC01118	2.324	HIST1H1C		MAP3K11	0.124	0.416	0.034	1.008
2.149	LINC00687	1.812	MROH2A	1.893	DLC1	2.302	NOL4L		MAP3K1	0.922	1.003	1.013	0.396
2.147	LOC101927286	1.8	LINC01119	1.893	DLC1	2.259	MIR6124		MAP2K7	0	0	0	0.263
2.089	VTI1B	1.778	SORCS3	1.888	SMARCAL1	2.232	OCEL1		MAP2K6	0	0.387	0	0
2.086	UGT1A1	1.763	DAB2	1.867	SMARCAL1	2.214	HIST1H4A		MAP2K5	0.019	0.019	0.019	0
2.067	ABCG4	1.763	DAB2	1.865	NUAK2	2.192	HIST1H3A		MAP2K4	0	0	0	0
2.064	ABCG4	1.743	PVRL1	1.854	TSGA13	2.183	RARA		MAP2K3	0.037	0.016	0.016	0.079
2.059	CDKN1B	1.743	PVRL1	1.833	UGT1A1	2.181	LPP-AS1		MAP2K2	0	0	0	0.457
2.033	BTD	1.743	PVRL1	1.83	TSGA13	2.162	LINC01139		MAP2K1	0.132	0.013	0.051	0.07
2.028	HACL1	1.705	LOC102724301	1.822	DSTYK	2.074	SLFNL1		AGTR2	0	0	0	0
2.028	HACL1	1.696	TRMT12	1.822	DSTYK	2.074	SLFNL1		TOPAZ1	0	0	0.057	0
2.028	HACL1	1.669	DAOA-AS1	1.797	LINC00671	2.074	SLFNL1		SPANXA2-OT1	0.046	0	0	0.605
2.028	HACL1	1.652	TDRD1	1.795	RPL37A	2.045	MGC57346-CRHR1		TMEM102	0	0	0	0.495
2.028	HACL1	1.638	G6PC	1.786	LINC01119	2.033	HIST1H1A		AKTIP	0	0	0	0
2.023	BTD	1.638	G6PC	1.772	MROH2A	2.001	SLAMF9		ECT2	0	0	0.086	0
2.023	BTD	1.63	NCOA5	1.724	ELF1	2.001	SLAMF9		LGALS16	0	0	0	0
2.023	BTD	1.613	LOC100506314	1.716	LOC101926940	2.001	SLAMF9		AREL1	0	0	0.549	0.068
2.006	BTD	1.613	MYSM1	1.709	ASB18	1.969	MIR4423		MADD	0.113	0.063	0.031	0.165
1.975	TSGA13	1.604	LINC00854	1.677	SPATA7	1.953	IGSF9		JMY	0	1.199	0.728	0.357
1.973	TMEM14A	1.602	CAPN14	1.677	SPATA7	1.953	IGSF9		LYN	0.167	0	0	0
1.966	TSGA13	1.598	SLC2A2	1.662	NIT2	1.942	MGC57346		LTK	0	0	0	0.172
1.953	RPL37A	1.598	SLC2A2	1.66	PAMR1	1.92	MGC57346-CRHR1		LTBR	0.561	0	0	0.067
1.915	TNIP1	1.598	SLC2A2	1.66	PAMR1	1.92	MGC57346		TDGF1	0.057	0.069	0.069	0.08
1.882	MIR4423	1.597	LINC00671	1.66	PAMR1	1.89	LIME1		PRKCE	0.178	0.526	0.465	0.178
1.879	TNIP1	1.596	MRPL33	1.658	PAMR1	1.875	NMNAT2		RNF152	0	0.106	0.201	0
1.879	TNIP1	1.596	MRPL33	1.641	COPG2	1.87	FARSA		BDNF	0	0	0	0.23
1.866	NUAK2	1.571	GALNT14	1.641	COPG2	1.869	MIR6515		CFL1	0	0	0	0
1.855	MICAL2	1.571	GALNT14	1.641	TTR	1.866	LINC01118		ANP32D	0	0	0.119	0.344
1.855	MICAL2	1.571	GALNT14	1.636	LINC01488	1.856	CALR		ANP32C	0	0	0	0
1.851	SELT	1.563	TMEM106A	1.636	LINC01488	1.852	RFPL3		ANP32E	0.336	0.336	0.336	0.336
1.84	DENND2C	1.563	TMEM106A	1.636	LINC01488	1.808	ALDH1L2		MOAP1	0	0	0	0
1.84	DENND2C	1.563	TMEM106A	1.636	LINC01488	1.808	ALDH1L2		TBX3	0	0.155	0.2	0
1.785	CLEC12B	1.563	TMEM106A	1.616	ABR	1.805	RAD23A		PDCD7	0	0	0	0.303
1.785	CLEC12B	1.556	LINC00676	1.603	MIR581	1.805	RAD23A		MEF2A	0.049	0.52	0.372	0.049
1.771	KY	1.552	C9orf135	1.588	GPR83	1.805	RAD23A		GRIK2	0	0.121	0.12	0.12
1.767	AMPD1	1.551	C9orf135-AS1	1.576	LOC100286922	1.805	RAD23A		IL24	0.694	0.455	0.048	0.536
1.767	AMPD1	1.549	CLDN14	1.576	LOC100286922	1.788	SLC2A4RG		TIAM1	0	0	0	0
1.758	KRT82	1.549	CLDN14	1.576	LOC100286922	1.768	LINC01119		IL7	0	0.159	0	0
1.752	AGO1	1.546	NLE1	1.569	WHAMMP1	1.761	KY		NME1	0.152	0.021	0.021	0.152
1.746	APOLD1	1.545	NLE1	1.564	STOML3	1.756	FCGR3A		NME3	0.059	0.144	0	0.03
1.742	MIR5689	1.533	SELT	1.564	STOML3	1.756	FCGR3A		NME4	0	0	0	0
1.725	TARBP1	1.529	CTXN3	1.522	BTD	1.756	FCGR3A		NME5	0.056	0.564	0	0
1.724	LINC01566	1.528	RNF139-AS1	1.519	HACL1	1.755	MAEL		PLK5	0	0	0	0.399
1.722	ANXA6	1.522	RNF139-AS1	1.519	HACL1	1.754	ILDR2		ANP32A	0	0	0.115	0
1.716	LINC01566	1.519	VTI1B	1.519	HACL1	1.747	ASB18		ZNF385C	0.271	0.014	0	0.489
1.713	LOC100286922	1.516	RNF139	1.519	HACL1	1.746	PVRL1		PDILT	0	0	0	0
1.713	LOC100286922	1.491	GALNT14	1.519	HACL1	1.746	PVRL1		SP100	0	0	0.098	0
1.713	LOC100286922	1.482	FSTL1	1.518	LOC100996255	1.746	PVRL1		LOR	0	0	0	0
1.703	ASCC2	1.479	UGT1A1	1.516	BTD	1.741	LINC01488		VPS35	0	0	0	0
1.703	ASCC2	1.472	TAS2R1	1.516	BTD	1.741	LINC01488		RPS6KB1	0.041	0.27	0.286	0.34
1.688	LOC102724020	1.467	MIR7641-2	1.516	BTD	1.741	LINC01488		TRPM7	0.08	0	0.039	0.036
1.687	CLEC9A	1.466	AFF3	1.514	WWC1	1.741	LINC01488		LEFTY1	0	0	0	0
1.667	SLC2A2	1.454	MIR6844	1.514	WWC1	1.731	SPEN		LEF1	0	0	0	0
1.667	SLC2A2	1.447	KIAA1467	1.514	WWC1	1.728	OLMALINC		LCK	0.466	0.36	0.36	0.439
1.667	SLC2A2	1.446	CCDC186	1.511	LINC01299	1.722	FLJ37453		LATS2	0.189	0	0.076	0.076
1.659	LINC00518	1.445	SUMO1P1	1.507	BTD	1.721	RFPL3		LATS1	0	0	0	0
1.658	LINC01118	1.436	LOC339807	1.492	LINC01139	1.719	FIGNL2		OGT	0	0	0	0
1.657	CSDE1	1.436	SORCS3-AS1	1.473	MIR606	1.717	SLFNL1-AS1		TRAF3	0.084	0.084	0.084	0
1.657	CSDE1	1.433	LOC100506142	1.468	ARHGEF10L	1.716	FCGR3A		REST	0	0.03	0	0.03
1.657	CSDE1	1.426	WDR41	1.46	MIR4422	1.716	FCGR3A		EIF2B5	0	0.027	0.027	0
1.657	CSDE1	1.423	MIR2110	1.458	XPC	1.709	LOC102724301		TARDBP	0	0.019	0.019	0
1.657	CSDE1	1.42	LOC101927159	1.458	XPC	1.696	TRIM9		PAK1	0	0	0.022	0
1.657	CSDE1	1.416	CTXN3	1.458	LSM3	1.696	TRIM9		FADD	0	0.179	0.132	0.219
1.649	PAQR4	1.416	SNX24	1.453	PARVA	1.686	RARA		ANKRD13C	0	0	0	0
1.645	WIF1	1.412	CD44	1.452	TNS3	1.686	RARA		MAPK7	0.098	0.131	0.084	0.112
1.643	PAQR4	1.412	CD44	1.448	HMGCR	1.682	DPF1		ERN2	0	0	0	0
1.643	PAQR4	1.412	CD44	1.448	HMGCR	1.682	DPF1		SLC35F6	0.099	0	0	0.061
1.643	PAQR4	1.412	CD44	1.437	LINC01314	1.682	DPF1		ZNF385B	0.429	0.583	0.335	0.094
1.641	TMEM135	1.412	CD44	1.415	BST1	1.669	DIO3		MAEA	0.264	0.265	0.265	0.265
1.641	TMEM135	1.412	CD44	1.413	LIMD1	1.663	LIMD1		RELT	0	0.049	0.037	0.08
1.641	TMEM135	1.412	CD44	1.411	OR13F1	1.657	AGO1		TNFRSF4	0.037	0	0	0.037
1.635	LINC01119	1.412	CD44	1.406	WBP4	1.647	MIR1247		STK40	0	0.019	0	0
1.599	SLC24A5	1.392	LOC100507144	1.404	LINGO1	1.644	DKK3		PELI3	0.014	0	0	0
1.598	RAD23B	1.388	TBC1D8	1.404	ARHGAP29	1.641	DKK3		CRH	0.468	0.468	0.468	0
1.578	RAD23B	1.378	GKN2	1.403	UACA	1.639	DKK3		PAK6	0.156	0	0	0
1.568	RRP15	1.373	DLC1	1.397	NAA11	1.611	CDKN1B		PAK4	0	0	0	0.118
1.568	RHBDL2	1.373	DLC1	1.396	MIR3183	1.61	MYOF		INSRR	0.063	0.039	0.04	0.058
1.562	RAD23B	1.373	CDKN1B	1.395	SIX4	1.61	MYOF		INS	0.591	0.573	0.019	0.593
1.553	WFDC6	1.373	LINC01227	1.394	MIR6844	1.588	TMLHE-AS1		INHBC	0.818	0	0.431	0.426
1.55	ZNF585A	1.372	KIAA1551	1.386	GALNTL5	1.588	LOC101927830		INHBB	0	0	0	0
1.55	ZNF585A	1.372	CREB3L2	1.386	GALNTL5	1.587	STAT3		INHBA	0	0	0	0
1.55	ZNF585A	1.372	CREB3L2	1.381	AGT	1.587	STAT3		INHA	0.46	0.029	0.266	0
1.538	ZNF585A	1.357	MICAL2	1.378	KRTAP10-8	1.587	STAT3		CX3CL1	0	0	0.024	0
1.535	MIR8075	1.357	MICAL2	1.375	CDKN1B	1.587	TNIP1		CTSC	0	0	0	0
1.533	PVRL1	1.356	LINC01227	1.374	EPB41L4B	1.584	LINC01133		RABGGTB	0.354	0.353	0	0.353
1.533	PVRL1	1.354	FER1L6	1.374	EPB41L4B	1.577	MIR5001		PTPN2	0.131	0	0.146	0.131
1.533	PVRL1	1.353	ABR	1.373	KIAA1551	1.576	EIF4E2		KRT78	0	0	0.066	0.143
1.532	COPG2	1.351	MIR4636	1.371	OR10W1	1.576	EIF4E2		DYNAP	0.012	0.454	0	0
1.532	COPG2	1.348	WWC1	1.361	MYOF	1.576	EIF4E2		PAX8	0	0.365	0	0.059
1.514	SLC7A2	1.348	WWC1	1.361	MYOF	1.576	EIF4E2		SPHK2	0	0	0	0.059
1.513	ALDH1L2	1.348	WWC1	1.359	MAST4	1.576	TIGD1		FOXO1	0.512	0.419	0.507	0.172
1.513	ALDH1L2	1.346	LOC101928600	1.359	MAST4	1.57	DIO3OS		DSTYK	0.872	0.645	1.822	0.873
1.51	LOC730101	1.346	LOC102724084	1.359	MAST4	1.564	PIM1		TRIO	0.703	0.325	0.456	0.133
1.51	LOC730101	1.328	PRSS23	1.356	LOC100996324	1.564	PIM1		SMNDC1	0	0	0	0.033
1.507	GPR19	1.32	PROKR1	1.355	SLC25A26	1.557	TNIP1		PIAS1	0.039	0	0	0
1.506	SMARCAL1	1.32	SNORD113-9	1.354	CRISPLD2	1.557	TNIP1		ARL6IP5	0	0.089	0	0.112
1.495	SMARCAL1	1.318	OXER1	1.35	TATDN1	1.555	GPR19		PAK3	0	0.304	0.304	0.327
1.488	ZNF585B	1.314	SCAF11	1.35	TATDN1	1.555	BPIFB4		ITM2C	0.063	0.129	0.013	0.147
1.482	LOC102724301	1.314	FAM20A	1.35	TATDN1	1.543	CCDC130		ARHGEF3	0	0.314	0.178	0.109
1.476	C9orf135	1.304	RUSC2	1.35	NDUFB9	1.538	PI16		ARHGEF4	0.493	0	0	0
1.475	CCDC130	1.302	NLRP10	1.35	NDUFB9	1.53	CDC6		ASAH2	0	0.249	0	0
1.475	C9orf135-AS1	1.302	CREM	1.35	NDUFB9	1.529	CEP55		CYP26B1	0	0.457	0.458	0
1.472	PCBP2	1.302	CREM	1.348	LOC101928191	1.529	CEP55		CDCA7	0	0	0	0
1.472	PCBP2	1.301	CREM	1.347	CLEC9A	1.529	DPF1		MALT1	0	0	0.012	0
1.472	PCBP2	1.301	CREM	1.346	KCNJ1	1.526	PI16		ELMO3	0.103	0.275	0.129	0.521
1.472	PCBP2	1.301	CREM	1.345	LOC102724020	1.52	ADAMTSL4-AS1		MTFP1	0	0	0.416	0
1.472	PCBP2	1.301	CREM	1.344	TXLNB	1.514	LEMD3		APH1A	0.084	0.084	0.084	0.084
1.472	PCBP2	1.301	CREM	1.342	G3BP2	1.514	LEMD3		PXT1	0.255	0.056	0.311	0.883
1.472	PCBP2	1.301	CREM	1.339	G3BP2	1.512	WDR63		BIRC6	0.044	0.044	0.044	0
1.472	TNIP1	1.301	CREM	1.339	G3BP2	1.512	WDR63		NACC2	0	0	0	0
1.472	NLRP10	1.299	OPRK1	1.326	SELT	1.511	SIT1		PRAMEF5	0	0	0	0
1.472	TNIP1	1.299	OPRK1	1.324	CLDN14	1.505	DPP9		NR2E1	0	0	0.07	0
1.472	TNIP1	1.29	MAST4	1.324	CLDN14	1.504	MCL1		C3orf38	0	0	0	0
1.472	TNIP1	1.29	MAST4	1.318	LOC339807	1.504	MCL1		NOC2L	0	0	0	0
1.472	TNIP1	1.29	MAST4	1.317	LYG2	1.504	MCL1		EYA4	0.129	0.13	0.948	0.151
1.467	SLN	1.288	FAM200B	1.317	LINC00954	1.498	TOMM40		EYA3	0.261	0.067	0.484	0.328
1.461	HRCT1	1.281	SIX2	1.317	LOC101928418	1.498	TOMM40		EYA2	0	0.156	0	0
1.442	CRTAM	1.275	C8orf89	1.31	MSS51	1.498	TOMM40		PKP3	0.141	0	0	0.275
1.442	LINC01100	1.273	MIR6124	1.309	GPR180	1.498	EXO5		EYA1	0.116	0.117	0	0
1.438	LINC00961	1.268	SH2D6	1.308	MET	1.493	MIR3190		CREB3L1	1.148	0.628	0.591	0.626
1.431	HP09053	1.267	GPRC5D	1.308	MET	1.493	MICAL2		TSC22D4	0.4	0.515	0.516	1.221
1.423	CMSS1	1.266	UNC45B	1.306	LINC00525	1.493	MICAL2		FAM32A	0.122	0.393	0.392	0.599
1.423	GORASP1	1.266	UNC45B	1.303	KCND3	1.491	MIR3191		GZMH	0.277	0.228	0.047	0
1.417	GORASP1	1.266	UNC45B	1.303	KCND3	1.489	MIR760		GZMB	0.481	0.455	0.013	0
1.417	GORASP1	1.263	MCFD2	1.301	NLRP10	1.489	BCAR3		LGALS7	0	0	0	0
1.417	GORASP1	1.263	MCFD2	1.297	LOC100507634	1.486	SLC2A11		BCL3	0	0	0	0
1.417	GORASP1	1.26	BST1	1.297	USP24	1.481	CTSF		SH3KBP1	0.06	0.587	0	0
1.414	TTC21A	1.259	GCSAM	1.295	EPB41L5	1.48	LOC101926943		BMP10	0.267	0.44	0.149	0.221
1.414	TTC21A	1.259	GCSAM	1.295	EPB41L5	1.479	SRL		GDF11	0.454	0.1	0.055	0.363
1.413	ASB18	1.259	GCSAM	1.295	EPB41L5	1.474	DNAL4		PROP1	0	0	0	0.273
1.41	MARCH3	1.243	TTC7A	1.293	EPB41L5	1.473	PAQR4		CHMP3	0.019	0	0	0
1.403	ABR	1.243	TTC7A	1.289	TBC1D32	1.473	ABR		PTRH2	0.061	0.016	0.029	0.074
1.402	EPPIN-WFDC6	1.243	TTC7A	1.289	TBC1D32	1.471	MIR7975		MAGED1	0	0	0.245	0
1.402	EPPIN	1.243	CNOT2	1.285	WDR64	1.468	PAQR4		AIFM1	0	0	0	0
1.402	EPPIN	1.243	CNOT2	1.279	CDR2	1.468	PAQR4		ATG7	0.03	0.06	0.286	0.256
1.393	DIO3OS	1.24	MIR3686	1.276	LOC100507639	1.468	PAQR4		FIS1	0.281	0.019	0.281	0.262
1.392	DIO3	1.239	LOC100996579	1.273	LOC643355	1.465	APOE		SIX3	0.667	1.024	0.667	0.567
1.387	MIR1247	1.239	LOC100996579	1.273	RAD23B	1.465	APOE		AKT1S1	0.535	0.026	0	0.558
1.387	DAOA	1.237	SNORD113-7	1.27	SOX1	1.465	APOE		UTP11	0	0	0	0
1.385	FAM20A	1.234	DKK3	1.269	LINC00862	1.462	NLRP10		USP17L6P	0	0.063	0	0
1.384	MIR4636	1.233	NKAIN1	1.254	EPHB6	1.461	HP09053		PRKCA	0.019	0.04	0.059	0
1.377	LINC01299	1.23	LINC01481	1.246	MTHFSD	1.458	LINC01569		TNFRSF1B	0.032	0.032	0.032	0.539
1.377	LMCD1-AS1	1.23	LINC01481	1.246	MTHFSD	1.452	APOE		TNFRSF21	0	0.017	0.017	0
1.375	MIR5096	1.23	LINC01481	1.246	MTHFSD	1.451	NCF1		MTCH2	0.02	0	0.015	0
1.375	MIR7641-2	1.227	PRSS23	1.246	MTHFSD	1.443	SERPINB9P1		KCNIP3	0	0.017	0.078	0
1.372	LMCD1	1.227	PRSS23	1.246	MTHFSD	1.443	STX18-AS1		SH3GLB1	0.064	0.064	0.064	0.252
1.372	LMCD1	1.227	PRSS23	1.246	MTHFSD	1.442	STX18		ERBB4	0	0.211	0	0
1.372	LMCD1	1.227	PRSS23	1.246	MTHFSD	1.436	SLC2A11		ERBB3	0.174	0.174	0.174	0.174
1.372	LMCD1	1.227	PRSS23	1.245	LPP-AS1	1.434	APOE		ERBB2	0.531	0.196	0.462	0.461
1.372	DAOA	1.227	PRSS23	1.244	MIR4459	1.432	LTF		CLIP3	0.339	0	0	0.157
1.372	DAOA	1.226	SNORD114-1	1.243	FLJ30679	1.429	PKMYT1		GLI3	0.19	0	0.189	0
1.366	TBX18	1.226	DAOA	1.242	EPHB6	1.429	PKMYT1		GSDMD	0.511	0.515	0	0.514
1.366	TIGD1	1.226	DAOA	1.242	EPHB6	1.429	PKMYT1		ADORA1	0.061	0	0	0
1.366	EIF4E2	1.225	MIR3183	1.242	MIR4315-2	1.429	PKMYT1		GSDMB	0	0	0	0
1.366	EIF4E2	1.224	DKK3	1.242	MIR4315-1	1.427	NYAP1		CAPN3	0	0	0	0
1.366	EIF4E2	1.224	DAOA	1.239	INTS10	1.423	G6PC		TSPO	0	0	0	0
1.366	EIF4E2	1.222	MAP3K4	1.234	RAD23B	1.423	G6PC		AXL	0	0	0	0.055
1.366	MIR5001	1.222	MAP3K4	1.232	NKAIN1	1.42	TOP1MT		CAST	0.652	0.652	0.946	0.995
1.358	SAMD9	1.222	MAP3K4	1.231	UBB	1.419	SLC2A11		CARD18	0.63	0.253	0.139	0
1.358	SAMD9	1.222	MAP3K4	1.231	CNTF	1.419	SLC2A11		KLHL20	0.659	0	0	0.177
1.357	ZNF663P	1.222	MAP3K4	1.231	UBB	1.419	SLC2A11		TMEM161A	0	0	0	0.11
1.35	RAPGEF1	1.221	LOC101929512	1.23	UBB	1.419	SLC2A11		HYPK	0.045	0.353	0.837	0.458
1.343	KREMEN2	1.219	TMEM38B	1.229	UBB	1.416	LTF		ADAM8	0	0	0	0
1.343	KREMEN2	1.219	CNOT2	1.227	UBB	1.41	RMRP		NLRP2	0.436	0	0.47	0.549
1.343	KREMEN2	1.217	CNOT2	1.227	UBB	1.403	KCNJ1		MAP1S	0	0	0	0
1.343	KREMEN2	1.214	LOC100286922	1.224	TMCC2	1.399	LINC00671		SLTM	0.059	0.664	0.349	0.213
1.343	CLCN6	1.214	LOC100286922	1.223	INTU	1.396	CCDC107		RNF216	0	0	0	0.124
1.343	CLCN6	1.214	LOC100286922	1.218	EPHB6	1.396	CCDC107		KRT80	0	0	0	0
1.343	CLCN6	1.213	ELMOD3	1.217	SNX24	1.396	CCDC107		HHIP	0	0	0.26	0
1.342	MTHFR	1.213	ELMOD3	1.212	T	1.396	CCDC107		IFT57	0	0	0	0.059
1.34	LEMD3	1.213	ELMOD3	1.212	T	1.395	TRIM31-AS1		STEAP3	0.035	0.282	0.05	0
1.34	LEMD3	1.213	ELMOD3	1.211	SETD9	1.391	TNNT1		WNT3A	0	0	0.155	0
1.339	BIRC2	1.212	RETSAT	1.211	SETD9	1.391	TNNT1		PDIA2	0	0	0	0
1.339	KIAA1467	1.209	DKK3	1.211	SMEK2	1.391	TNNT1		TRAF1	0	0.386	0	0
1.338	LOC101929412	1.208	SMEK2	1.211	SMEK2	1.391	TNNT1		NAIP	0	0	0	0
1.338	FAM102B	1.208	SMEK2	1.211	SMEK2	1.391	TSGA13		TRIM32	0	0	0	0
1.335	LINC01114	1.208	SMEK2	1.209	DAOA-AS1	1.389	MIR146A		STK4	0.036	0	0	0.05
1.33	AARD	1.203	ANKRD33	1.208	FOPNL	1.387	ANKRD33		NLE1	0.025	1.546	0	0
1.329	BIRC2	1.203	ANKRD33	1.208	FOPNL	1.387	ANKRD33		""	0	0	0	0
1.329	BIRC2	1.203	ANKRD33	1.208	FOPNL	1.387	ANKRD33		MLLT11	0.129	0	0	0.293
1.329	PRG1	1.203	ANKRD33	1.208	FOPNL	1.387	ANKRD33		FAIM	0	0.05	0.05	0.05
1.327	MIR6131	1.202	MYO16	1.208	FOPNL	1.384	MIR3925		DLC1	0.641	1.373	1.893	0.486
1.326	KRT71	1.199	JMY	1.208	FOPNL	1.383	LYG2		MSH6	0.163	0	0.013	0
1.326	GALNT11	1.197	RPL37A	1.208	FOPNL	1.382	VTI1B		MSH2	0	0	0	0
1.326	GALNT11	1.197	RAD23B	1.208	FOPNL	1.381	BBC3		GSDMA	0	0	0	0
1.325	SIKE1	1.193	LOC101927543	1.208	FOPNL	1.378	DFFA		ATAD3A	0.245	0.019	0.019	0.053
1.325	SIKE1	1.191	MIR4253	1.206	LTF	1.378	DFFA		NEK1	0	0	0	0
1.325	SIKE1	1.188	LOC400548	1.205	TMCC2	1.376	CD320		PNMA5	0	0	0	0
1.325	SIKE1	1.185	RAD23B	1.204	DNAJB3	1.376	CD320		SYNGAP1	0	0	0	0.205
1.318	LOC339807	1.185	KCNIP1	1.204	TNIP1	1.372	CD97		ADCY10	0.048	0.048	0.083	0.048
1.314	LYG2	1.182	SETD9	1.201	RAD23B	1.372	CD97		ZNF385A	0	0	0	0
1.31	CD177	1.182	SETD9	1.2	TRMT13	1.372	CD97		DHODH	0	0	0	0.078
1.301	LPAR3	1.18	CREM	1.2	SASS6	1.372	COPG2		TNFAIP8	0.08	0	0	0
1.3	CNFN	1.18	CREM	1.2	SASS6	1.372	COPG2		NOX5	1.199	0	0.587	0.596
1.296	CHI3L2	1.18	HAAO	1.2	CABS1	1.37	CRISPLD2		BBC3	0.766	0	0.223	1.381
1.293	WDR12	1.174	C3orf80	1.2	MYO16	1.369	CMSS1		RBM10	0	0	0	0
1.293	CARF	1.173	RAD23B	1.2	GTF2IRD1	1.361	ADAMTS12		FGD1	0.36	0	0	0
1.293	CARF	1.172	TMEM262	1.2	GTF2IRD1	1.36	CD151		XIAP	0	0	0	0
1.293	CARF	1.172	TMEM262	1.2	GTF2IRD1	1.36	CD151		ARHGEF17	0	0.106	0.106	0
1.293	CARF	1.172	HMGCR	1.197	SLC17A9	1.36	CD151		GAS1	0	0	0	0
1.293	CARF	1.172	HMGCR	1.197	SLC17A9	1.36	CD151		NLRP3	0	0	0	0
1.291	MAST4	1.171	GSG1	1.196	CEP55	1.359	SLC2A2		BIRC8	0	0.09	0	0.611
1.291	MAST4	1.171	GSG1	1.196	CEP55	1.359	SLC2A2		RYK	0.126	0.126	0	0.126
1.291	MAST4	1.171	GSG1	1.196	KRTAP10-9	1.359	SLC2A2		THBS1	0.054	0.604	0.624	0
1.29	T1560	1.171	GSG1	1.195	LPXN	1.356	HSD17B8		BTK	0	0	0	0
1.286	IFT46	1.17	SNORD114-2	1.193	LIMK2	1.353	UGT1A1		SHARPIN	0	0	0	0
1.286	IFT46	1.168	ZNF793-AS1	1.193	LIMK2	1.35	BBC3		MAPT	0.108	0	0	0
1.285	CAND1.11	1.168	LOC200726	1.192	SCYL1	1.35	BBC3		DAPK2	0.084	0	0	0.084
1.284	PKMYT1	1.167	MYOF	1.192	SCYL1	1.35	BBC3		SNCA	0.183	0.183	0	0.183
1.284	PKMYT1	1.167	MYOF	1.192	ADAMTS12	1.348	SCRN1		TMEM117	0	0	0	0
1.284	PKMYT1	1.166	TMEM246-AS1	1.192	LOC400548	1.348	SCRN1		ATPIF1	0.3	0	0.145	0.984
1.284	PKMYT1	1.166	TMEM246-AS1	1.191	SLC7A2	1.346	CDKL2		TGFB3	0	0	0	0
1.271	WDR63	1.161	TMEM246-AS1	1.191	SLC4A7	1.345	SLC4A7		PERP	0	0	0	0
1.271	WDR63	1.161	TMEM246-AS1	1.191	PHOSPHO1	1.344	TSGA13		TXNDC12	0	0	0.565	0
1.267	SLC30A8	1.161	SNORD113-6	1.191	PHOSPHO1	1.343	OPRM1		FLT1	0.035	0.035	0	0
1.265	ADM	1.161	CASC21	1.19	C3orf80	1.343	OPRM1		FLT3	0.209	0	0.176	0.328
1.262	TTC12	1.161	C14orf166	1.19	LTF	1.34	KIAA0226		FLT4	0	0	0.012	0
1.261	MIR3183	1.161	ZNF793	1.19	COLEC12	1.337	RFPL3S		DDAH2	0	0	0	0.172
1.259	MINPP1	1.159	SLC25A18	1.189	GP6	1.337	RFPL3S		SNAI1	0.053	0.053	0	0
1.259	SLC30A8	1.159	SLC25A18	1.189	GP6	1.336	FAM102B		LCMT1	0.221	0.221	0.579	0
1.259	SLC30A8	1.155	RPSAP9	1.189	GP6	1.333	LINC00475		SLC25A27	0	0.046	0	0.046
1.259	MIR4435-2	1.152	CTRB1	1.188	TNIP1	1.333	SCRN1		PITX3	0.015	0.071	0	0.101
1.259	MIR4435-1	1.151	OR7E2P	1.188	TNIP1	1.33	MTCH1		SMAD3	0.074	0	0.074	0.522
1.258	LOC414300	1.148	EXT1	1.183	PDGFD	1.33	MTCH1		PDCD6	0.094	0.44	0.66	1.04
1.258	KIAA1033	1.142	LOC101927657	1.183	PDGFD	1.33	MTCH1		NUAK2	1.866	0.841	1.865	0.867
1.258	KIAA1033	1.141	GCNT4	1.182	LINC01126	1.327	RFPL3S		BAG3	0.085	0	0	0
1.254	SLC9A7P1	1.141	ENDOV	1.181	PI15	1.324	SCRN1		ZPR1	0.328	0.074	0	0
1.252	ATXN10	1.141	ENDOV	1.181	PSD3	1.324	SORBS2		EFNA1	0.255	0	0	0.391
1.252	ATXN10	1.141	ENDOV	1.18	ABCG1	1.324	SORBS2		LDHA	0	0	0	0
1.251	NLRX1	1.141	LOC100294362	1.178	ABCG1	1.324	SORBS2		PDCD2	0	0	0	0
1.249	OSMR-AS1	1.139	LOC100289473	1.177	ABCG1	1.324	SORBS2		IL11	0.026	0	0	0.028
1.249	PARD6B	1.138	LINC00977	1.176	ABCG1	1.32	OPRM1		GDF1	0.067	0	0	0.042
1.249	OSMR	1.135	CLPB	1.176	ABCG1	1.32	OPRM1		DYNLL2	0.951	0.724	1.051	0.695
1.246	OSMR	1.135	CLPB	1.174	ABCG1	1.316	MIR3142		GLI2	0	0	0.022	0.234
1.246	DAW1	1.135	CLPB	1.173	SLC4A3	1.314	MROH2A		PUF60	0.03	0.054	0	0.03
1.245	GRN	1.135	CLPB	1.173	SLC4A3	1.314	SCUBE3		LGALS13	0.026	0	0	0.062
1.245	CHI3L2	1.134	SNORD114-3	1.173	SLC4A3	1.314	SCUBE3		TXNDC5	0	0	0	0
1.245	CHI3L2	1.133	THAP2	1.171	LOC388942	1.314	GARNL3		UBE2B	0	0.016	0	0.193
1.242	KCNIP1	1.132	C10orf126	1.17	TCF7L2	1.308	LOC414300		SAP30BP	0	0	0	0
1.241	SMYD2	1.132	FRRS1L	1.17	TCF7L2	1.306	KIAA1033		GLS2	0	0	0	0
1.241	EGFR	1.132	RAI14	1.17	TCF7L2	1.306	KIAA1033		BCAP29	0	0	0	0
1.241	EGFR	1.13	ZFC3H1	1.17	TCF7L2	1.304	RAPGEF1		PGAP2	0.029	0.029	0.032	0.171
1.241	EGFR	1.127	C20orf24	1.17	TCF7L2	1.303	MIR219A1		DDX20	0	0.013	0.013	0
1.241	EGFR	1.127	C20orf24	1.17	TCF7L2	1.299	MIR3183		DNAJA3	0.226	0.963	0.609	0.226
1.239	NLRX1	1.127	C20orf24	1.17	TCF7L2	1.298	POLR2L		PRAMEF12	0	0	0	0
1.239	NLRX1	1.127	C20orf24	1.17	TCF7L2	1.296	TSPAN4		IP6K2	0.016	0	0.028	0
1.239	NLRX1	1.127	UBB	1.17	TCF7L2	1.296	TSPAN4		IL20RA	0.018	0.018	0.02	0
1.239	RPSAP9	1.127	UBB	1.17	TCF7L2	1.296	TSPAN4		NAT8B	0	0.09	0	0
1.235	MIR6514	1.127	UBB	1.17	TCF7L2	1.295	TSPAN4		NAT8	0	0.13	0	0
1.234	MINPP1	1.126	UBB	1.17	TCF7L2	1.295	TSPAN4		NFKBID	0.915	0	0	0.215
1.234	MINPP1	1.126	UBB	1.17	TCF7L2	1.291	RING1		CIDEB	0.055	0	0	0
1.234	MKRN7P	1.126	UBB	1.17	ITGB1	1.29	MCFD2		IL19	0.545	0.744	0.503	1.065
1.234	LOC101927310	1.126	PHACTR1	1.167	2018-03-04	1.29	MCFD2		IL33	0	0.051	0.063	0
1.233	SPRED2	1.126	PHACTR1	1.167	LOC101927482	1.29	TSPAN4		IL31RA	0	0.477	0	0.391
1.232	MIR4678	1.12	ERBB2IP	1.167	LOC101927482	1.29	MIR1278		PDE1A	0.459	0.46	0	0
1.232	SLFNL1	1.12	ERBB2IP	1.167	SERBP1	1.287	TSPAN4		CAAP1	0	0	0	0
1.232	SLFNL1	1.12	ERBB2IP	1.167	SERBP1	1.285	CRACR2B		CAMK2A	0.064	0.048	0	0.048
1.232	SLFNL1	1.12	ERBB2IP	1.167	SERBP1	1.285	CRACR2B		ESR1	0.099	0.195	0.457	0
1.232	NKAIN1	1.12	ERBB2IP	1.167	SERBP1	1.283	INTS1		SOX4	0	0	0.019	0
1.227	TMEM223	1.12	ERBB2IP	1.167	TGFB2-AS1	1.282	AARD		MAPK8IP1	0	0	0.106	0
1.226	LOC101930071	1.118	SYBU	1.166	ZFP36L2	1.279	RAD23B		ZMAT4	0	0	0	0
1.225	LIPE-AS1	1.118	SYBU	1.165	KY	1.278	EPS8L2		AIFM3	0	0	0	0
1.224	TMEM133	1.118	SYBU	1.164	KAZN	1.277	DPCR1		NRBP2	0.019	0.034	0	0
1.22	VWA5B1	1.116	LIFR	1.164	KAZN	1.276	HERC4		DICER1	0	0	0.04	0.076
1.22	TFAP2A	1.116	PLCB4	1.164	TGFB2	1.276	HERC4		CTSB	0	0.069	0	0
1.217	SBF2	1.116	MRPL30	1.164	TGFB2	1.276	HERC4		UBE2Z	0.023	0.038	0	0.049
1.215	TATDN1	1.116	MRPL30	1.162	ASCC2	1.276	HERC4		ATG3	0	0.013	0	0
1.215	TATDN1	1.115	RECK	1.162	ASCC2	1.276	HERC4		PLEKHG2	0	0.477	0	0
1.215	TATDN1	1.115	WDR12	1.162	DNAJC13	1.275	TNNI3		APAF1	0.338	0	0	0
1.215	NDUFB9	1.115	CARF	1.161	C14orf166	1.273	RXRB		SUDS3	0	0.037	0	0
1.215	NDUFB9	1.115	CARF	1.161	GJD4	1.273	SLC39A7		CHEK1	0	0.291	0	0
1.215	NDUFB9	1.115	CARF	1.16	ITGB1	1.273	SLC39A7		TRIM35	0	0	0.049	0
1.212	LINC00676	1.115	CARF	1.159	SCAF11	1.273	SLC39A7		ZNF830	0.26	0.355	0.26	0.26
1.211	RAB5C	1.115	CARF	1.159	MIR7156	1.273	JAK1		MET	1.107	0.471	1.308	0.598
1.211	RAB5C	1.115	MITD1	1.158	TRA2B	1.272	GARNL3		MERTK	0	0.081	0	0.382
1.211	RAB5C	1.113	GNGT2	1.158	TRA2B	1.272	GARNL3		PRKAA2	0	0	0	0
1.208	MIR6748	1.113	GNGT2	1.157	CORIN	1.271	RXRB		EGR3	0.494	0.094	0.093	0.371
1.208	ANXA6	1.113	GNGT2	1.157	CORIN	1.271	RXRB		NTF4	0.032	0.032	0.032	0.385
1.208	NBPF18P	1.112	PIGF	1.157	CORIN	1.269	RAD23B		PLAGL2	0	0	0	0
1.204	PGM1	1.112	PIGF	1.155	ZNF281	1.264	UQCRHL		KRT82	1.758	0.707	0.035	0.035
1.204	DKK3	1.112	SNORD114-4	1.155	ZNF281	1.262	RAD23B		KRT84	0.853	0.348	0.015	0
1.201	SGCA	1.112	CRIPT	1.155	ZNF281	1.259	VCAM1		KREMEN1	0	0	0	0
1.201	SGCA	1.11	FAM169A	1.155	SUMO1P1	1.259	VCAM1		FGF21	0	0	0	0
1.199	NOX5	1.109	TNS1	1.153	ART3	1.259	VCAM1		EGLN3	0	0	0.119	0
1.199	NOX5	1.109	FAM169A	1.153	ART3	1.257	TTC7A		VSTM2L	0.028	0	0	0.364
1.199	MYSM1	1.107	ASAP1-IT1	1.151	LOC102467080	1.257	TTC7A		PLSCR3	0	0	0	0.72
1.199	TMEM179B	1.105	TMEM174	1.15	LINC00691	1.257	TTC7A		ROS1	0	0	0	0
1.198	HSPH1	1.104	SYBU	1.144	OR51B2	1.256	PSEN1		ROR2	0.188	0.175	0.141	0.532
1.198	HSPH1	1.104	SYBU	1.144	C10orf126	1.256	PSEN1		ROR1	0.519	0.522	0.522	0.316
1.198	SMCO2	1.103	LINC00475	1.142	LTBP1	1.254	KCNJ1		DUSP22	0	0	0	0
1.198	CREM	1.101	AKIP1	1.14	LINC00977	1.254	KCNJ1		CD3E	0	0	0	0.423
1.198	CREM	1.101	AKIP1	1.14	MIR8075	1.254	KCNJ1		TOMM22	0.024	0.013	0.013	0
1.195	CREM	1.101	AKIP1	1.139	ALDH1A2	1.254	KCNJ1		TNFRSF19	0.507	0.508	0.508	0.507
1.195	CREM	1.101	AKIP1	1.139	ALDH1A2	1.253	MYO16		GLRX2	0.284	0	0.261	0.676
1.195	CREM	1.101	AKIP1	1.139	ALDH1A2	1.253	TRIP10		RETREG1	0	0	0	0
1.195	CREM	1.101	AKIP1	1.139	RPS10P7	1.253	TRIP10		YARS	0.107	0	0.058	0.073
1.195	CREM	1.101	ST5	1.138	OR51B6	1.253	TRIP10		APOPT1	0	0	0	0
1.195	CREM	1.1	LTA4H	1.138	DKK3	1.253	TRIP10		TCP1	0	0	0	0.356
1.195	CREM	1.1	LTA4H	1.137	NUDT4	1.253	PEX14		XKR8	0.109	0.126	0	0.234
1.193	HSPH1	1.1	SNORD113-5	1.137	NUDT4	1.248	FGF3		SPI1	0.318	0.317	0.664	0.537
1.193	HSPH1	1.099	SYBU	1.137	NUDT4	1.247	EDN1		ZNF385D	0.081	0.031	0.031	0.031
1.192	ADAMTSL4-AS1	1.095	ABI3	1.137	TCL6	1.247	EDN1		FGD4	0	0.419	0.42	0.419
1.192	DKK3	1.095	ABI3	1.136	PVRL3-AS1	1.246	SYCE2		CYP1B1	0.015	0	0	0
1.19	COLEC12	1.094	SMARCAL1	1.135	LINC00475	1.245	SNX19		MPV17L	0	0	0	0.052
1.187	GFM2	1.091	SNORD114-5	1.132	ITPKC	1.245	SNX19		DEDD	0	0	0	0
1.187	GFM2	1.089	SMARCAL1	1.131	PRKAG2	1.244	MAEL		IFI16	0	0.053	0.053	0.271
1.187	GFM2	1.088	GNGT2	1.131	MIR1273C	1.244	MAEL		HIF1A	0	0	0	0
1.187	GFM2	1.087	MIR5689	1.13	STAT3	1.243	GRN		USP17L2	0	0	0	0
1.187	GFM2	1.084	XRCC6BP1	1.13	STAT3	1.238	H2AFB2		PDK4	0	0	0	0
1.18	NSA2	1.084	SLC8A1	1.13	ANXA6	1.238	TMEM262		PTGIS	0	0.011	0	0
1.18	NSA2	1.082	PDCD5	1.13	DCTN4	1.238	TMEM262		NTRK2	0.09	0	0.559	0
1.18	NSA2	1.076	OR10A3	1.13	DCTN4	1.236	OSBPL3		VAV3	0.538	0.535	0.512	0.537
1.178	UBB	1.075	LOC100500773	1.129	RBPJ	1.236	LINC00696		BAK1	0	0	0	0.044
1.178	UBB	1.075	B4GAT1	1.129	RBPJ	1.235	OR4F16		ADNP	0.333	0.414	0	0.537
1.178	POLB	1.073	ZNF331	1.129	STAT3	1.235	OR4F3		ACIN1	0	0	0.44	0
1.178	UBB	1.072	ENPP2	1.127	PRKAG2-AS1	1.235	OR4F29		CDIP1	0.018	0.029	0.018	0.459
1.178	UBB	1.072	ENPP2	1.127	DKK3	1.234	H2AFB3		TAOK2	0.156	0.156	0	0.117
1.178	UBB	1.072	ENPP2	1.127	MICAL2	1.234	H2AFB1		H1F0	0.431	0.444	0.432	0.685
1.177	UBB	1.071	MICAL2	1.127	MICAL2	1.233	NOP14		PNMA2	0.115	0.044	0.296	0.044
1.177	MICAL2	1.071	MICAL2	1.126	LTA4H	1.233	NOP14		PNMA3	0	0	0	0
1.177	MICAL2	1.071	ASB18	1.125	FANCE	1.233	NOP14		ZNF346	0.451	0	0.347	0.169
1.177	MICAL2	1.07	RAMP2-AS1	1.124	NUDT4P1	1.23	MINPP1		KLK12	0	0.148	0	0.642
1.176	ZNF430	1.07	RAMP2-AS1	1.124	SERP1	1.229	LY6E		TAOK3	0	0.032	0	0
1.176	ZNF430	1.07	RAMP2	1.123	NUDT4P2	1.229	LY6E		PDCL3	0.069	0.147	0.069	0.07
1.175	ASMT	1.068	TMEM135	1.123	MRPL46	1.228	MRPL33		USP47	0.588	0.153	0.177	0.261
1.173	DKK3	1.068	TMEM135	1.123	NUDT4	1.228	MRPL33		SLK	0	0	0	0
1.173	ASMT	1.068	TMEM135	1.123	NUDT4	1.228	CLK2		CASP8AP2	0	0	0	0
1.172	PCBP2-OT1	1.067	TTC7A	1.122	LPXN	1.228	CLK2		SEMA6A	0.041	0.218	0.558	0
1.172	SBF2-AS1	1.067	MCFD2	1.122	ADCK4	1.228	CLK2		RARB	0.481	0.895	0	0.481
1.171	ASMT	1.067	MCFD2	1.121	EIF2A	1.227	GRK4		DDRGK1	0	0	0	0
1.169	RPS10P7	1.066	LTA4H	1.121	GPX4	1.227	GRK4		HSPD1	0.016	0	0	0
1.163	BPESC1	1.063	ADAMTS12	1.121	GPX4	1.227	GRK4		APPL1	0	0	0	0
1.163	MYO16	1.063	BRMS1	1.121	MRPS11	1.227	GRK4		TNIK	0	0.017	0	0
1.16	LOC101928600	1.063	BRMS1	1.121	MRPS11	1.226	NCOA5		LRP6	0.415	0.258	0.257	0
1.157	LOC100128885	1.063	MIR6514	1.12	ENPP1	1.225	LINC01429		PGAM5	0	0	0	0
1.157	KIAA0930	1.062	RFPL2	1.12	PVRL3	1.224	LOC100133669		PRKRA	0.258	0	0	0
1.157	IRS2	1.062	FHOD1	1.12	PVRL3	1.224	APOLD1		SLC30A10	0	0	0.014	0.066
1.156	LINC01139	1.06	TMEM179B	1.12	FGD6	1.222	C3orf56		TNFSF15	0	0	0	0
1.152	MIR4512	1.059	SNORD114-6	1.119	LOC643339	1.221	TSC22D4		ATG5	0.013	0.013	0.013	0
1.15	LOC101926940	1.059	TMEM223	1.118	BRAF	1.221	TSC22D4		GABARAP	0.097	0	0	0.148
1.15	HINFP	1.058	MCFD2	1.118	SBF2-AS1	1.221	TSC22D4		FXN	0.529	0.299	0.015	0
1.15	HINFP	1.058	MCFD2	1.117	VEZT	1.221	TSC22D4		TAF9	0.296	0.296	0.295	0
1.15	HINFP	1.058	MCFD2	1.117	VEZT	1.22	TNIP1		CALR	0.88	0.876	0.505	1.856
1.149	TCAP	1.058	APOLD1	1.117	VEZT	1.22	TNIP1		UNC5C	0	0	0	0
1.148	BTBD3	1.056	HSDL2	1.117	WDR41	1.22	TNIP1		DLG5	0	0	0	0
1.148	BTBD3	1.056	HSDL2	1.116	NXNL2	1.22	TNIP1		IL17A	0	0	0	0
1.148	CREB3L1	1.056	HSDL2	1.116	NXNL2	1.22	TNIP1		CARD9	0	0	0	0
1.147	TMEM242	1.055	MIR6748	1.111	RBPJ	1.219	SH2D3A		BCL2A1	0	0	0	0.055
1.147	OR13F1	1.054	GHRH	1.111	RBPJ	1.218	GORASP1		EGFR	1.241	0.112	0.966	0.987
1.146	PNMT	1.054	GHRH	1.111	DANCR	1.215	GORASP1		INHBE	0.973	0	0.374	0.877
1.146	PNMT	1.053	RFPL2	1.11	MYH11	1.215	GORASP1		RASSF3	0	0.602	0	0
1.145	SNAPC5	1.052	MIR581	1.11	MYH11	1.215	GORASP1		BCL6	0.064	0.128	0	0
1.144	HYOU1	1.052	REXO2	1.11	MYH11	1.215	GORASP1		CASR	0	0	0	0
1.144	HYOU1	1.051	BAIAP2	1.11	MYH11	1.215	LOC283731		ARNT2	0	0	0	0
1.143	CRISPLD2	1.051	BAIAP2	1.11	PVRL3	1.215	ISLR2		LEP	0	0	0.509	0
1.143	ALDH1A2	1.051	BAIAP2	1.11	DKK3	1.214	TTC21A		SGK2	0	0	0	0
1.143	ALDH1A2	1.051	BAIAP2	1.109	MIR4449	1.214	TTC21A		ZC3HC1	0.214	0	0	0
1.143	ALDH1A2	1.048	SMARCA4	1.109	BOD1	1.214	ISLR2		NEK6	0	0.156	0	0.151
1.141	OLFML2A	1.048	SMARCA4	1.109	BOD1	1.213	PRF1		CAPN10	0.26	0.259	0.26	0.26
1.139	LINC00977	1.048	SMARCA4	1.109	NMNAT2	1.213	PRF1		BMPR2	0.011	0	0	0
1.139	PPP2R5C	1.048	SMARCA4	1.107	NAA20	1.213	ISLR2		ID1	0	0	0	0
1.139	PPP2R5C	1.047	RFPL2	1.107	NAA20	1.213	ISLR2		PEG3	0	0	0	0
1.139	PPP2R5C	1.047	RAI14	1.106	ZNF224	1.211	EXTL1		HSPE1	0.015	0	0	0
1.137	ZWILCH	1.047	RAI14	1.105	CLPB	1.21	MINPP1		PKP1	0	0.326	0	0.327
1.137	ZWILCH	1.046	ABTB2	1.105	CLPB	1.21	MINPP1		TNFAIP1	0.058	0	0.058	0.209
1.137	ZWILCH	1.045	SNORD114-19	1.105	CLPB	1.209	MIR4678		SGMS1	0.273	0.41	0.203	0.254
1.137	ZWILCH	1.045	PPP2R2A	1.105	CLPB	1.208	MIR4504		NOD2	0	0	0	0
1.137	TFAP2A	1.043	EHD3	1.105	FAM200B	1.206	MIR5689		TMBIM4	0.022	0.021	0	0
1.136	RPL4	1.041	MIR4768	1.104	SNORA26	1.205	SELT		PROK2	0	0	0	0
1.135	CLEC1B	1.038	MESDC1	1.104	DCTN4	1.203	ZFAS1		DAP3	0	0	0	0.771
1.135	CLEC1B	1.038	FAM53B-AS1	1.103	LOC100271832	1.201	ENOX1		DAP	0.283	0.248	0.259	0.24
1.132	BST1	1.038	FAM53B-AS1	1.102	DDIT4	1.201	ENOX1		NAIF1	0.173	0.191	0	0.173
1.13	SNORD18A	1.037	TRIM9	1.099	MTUS2	1.2	KREMEN2		TAF9B	0	0	0	0.189
1.13	CIRBP	1.037	TRIM9	1.099	2018-03-01	1.2	KREMEN2		THOC6	0.225	0.076	0.077	0.262
1.13	CIRBP	1.036	SNORD114-18	1.099	LOC101927269	1.2	KREMEN2		ADARB1	0	0	0	0
1.13	CIRBP	1.035	ARHGEF10L	1.098	FAM186A	1.2	KREMEN2		CRADD	0.193	0.193	0	0.297
1.13	CIRBP	1.035	ARHGEF37	1.097	PVRL1	1.2	CLPB		ITGAV	0.022	0.224	0.022	0
1.13	CIRBP	1.035	ABHD12	1.097	PVRL1	1.2	CLPB		ARG2	0.277	0.567	0.125	0.272
1.13	SNORD16	1.035	ABHD12	1.097	PVRL1	1.2	CLPB		IL2RB	0.355	0.087	0.247	0.686
1.129	SNORD18C	1.034	BAIAP2-AS1	1.094	TMEM55A	1.2	CLPB		MKNK2	0	0	0	0
1.129	SNORD18B	1.032	HPCAL1	1.094	ZFP91	1.2	HCN3		MMP9	0.355	0.376	0.141	0.361
1.129	ITPKC	1.032	ESYT1	1.094	ZFP91	1.2	HCN3		SRPX	0	0	0	0
1.128	RFK	1.032	ESYT1	1.094	ZFP91-CNTF	1.197	LINC00977		PACS2	0	0	0	0
1.127	PCDHAC1	1.031	HPCAL1	1.093	NAA20	1.197	CREM		TAX1BP1	0.362	0	0	0
1.127	PCDHAC1	1.031	MIR4315-2	1.092	UGT1A3	1.197	CREM		PRKDC	0	0.201	0.181	0.18
1.127	SLC37A4	1.031	MIR4315-1	1.092	TMEM194B	1.196	SNORD12C		FOXL2	0	0.206	0.194	0
1.127	SLC37A4	1.031	MIR190A	1.091	GPX4	1.195	ZNFX1		UMODL1	0.014	0.014	0.014	0
1.127	SLC37A4	1.031	HEBP1	1.09	ZDHHC3	1.195	MIR4668		RHOA	0.309	0.456	0.012	0.765
1.127	SLC37A4	1.031	HIF1AN	1.09	ZDHHC3	1.195	SLC30A8		PMAIP1	0	0	0	0.049
1.126	LOC100506178	1.03	ACVR2A	1.09	SAMD9	1.195	MIR378H		RRAGC	0.119	0.032	0.08	0.083
1.124	INTS1	1.03	ACVR2A	1.09	SAMD9	1.195	KIAA0930		CLSPN	0.02	0	0	0
1.124	RDH11	1.03	RFK	1.089	GREM2	1.194	CREM		PIDD1	0.324	0.128	0.127	0.764
1.124	RDH11	1.029	MIR4730	1.088	EXOSC7	1.194	CREM		TPT1P8	0	0	0	0
1.123	MALSU1	1.029	MON2	1.088	EXOSC7	1.194	CREM		ELL3	0.018	0.491	0.554	0.182
1.122	GRIK4	1.029	MON2	1.088	OVCH1-AS1	1.194	CREM		RAPSN	0.069	0.106	0.132	0.082
1.122	GRIK4	1.029	MON2	1.088	OVCH1-AS1	1.194	CREM		BCL2L12	0	0	0	0
1.121	CASC18	1.029	MON2	1.088	OVCH1-AS1	1.194	CREM		GAPDH	0.113	0	0	0
1.121	CASC18	1.029	MON2	1.085	NOL4L	1.194	CREM		CCAR2	0.012	0	0	0
1.121	MNS1	1.029	HTR7P1	1.083	LOC101927159	1.194	ARHGEF18		HMGCR	0.61	1.172	1.448	0.744
1.121	LOC440028	1.028	FKBP10	1.081	MVK	1.193	ZFAS1		ERCC6	0	0	0	0
1.12	BCL7A	1.027	SNORD113-4	1.081	MVK	1.193	ZFAS1		BABAM2	0	0	0	0
1.12	BCL7A	1.026	LOC101927132	1.081	MVK	1.193	ZFAS1		PLAG1	0	0	0	0
1.119	ADCK4	1.025	ACVR2A	1.081	MMAB	1.193	ZFAS1		HSP90B1	0.091	0.211	0.108	0.199
1.115	CDH13	1.024	SIX3	1.081	MMAB	1.191	ERRFI1		PKM	0	0	0	0
1.115	CDH13	1.024	LIMD1	1.081	CAPS2	1.19	MORN4		TCTN3	0	0.112	0.019	0.112
1.115	CDH13	1.024	SIX3-AS1	1.081	CAPS2	1.189	KCNJ12		MTDH	0	0	0	0
1.115	CDH13	1.023	PREX1	1.08	MIR190A	1.188	MORN4		TMEM214	0	0	0	0
1.115	CDH13	1.023	SLC9A5	1.078	CTRB1	1.188	BHLHE40-AS1		ALKBH1	0.02	0.045	0	0
1.115	CDH13	1.023	SLC4A5	1.074	GTF2IRD2	1.188	BHLHE40-AS1		AVEN	0.015	0	0	0
1.114	NR6A1	1.023	SNORD114-17	1.074	GTF2IRD2	1.188	BHLHE40-AS1		GDF3	0.372	0.511	0.755	0
1.114	NR6A1	1.022	ZFPL1	1.073	NKX2-1-AS1	1.186	LOC100505666		TCIM	0	0	0	0
1.114	NR6A1	1.022	BTBD17	1.072	OR10A3	1.185	SLC30A8		BMF	0.381	0.371	0.386	0.349
1.111	LOC146880	1.022	CDKL4	1.072	SFTA3	1.185	SLC30A8		FAF1	0.014	0	0	0
1.111	CREM	1.022	NUP93	1.071	KATNAL1	1.185	BSCL2		KRT39	0.318	0	0.317	0.49
1.111	CREM	1.022	GPR19	1.07	NKX2-1	1.185	BSCL2		KRT40	0.515	0	0.516	0.905
1.109	KIAA1211	1.021	CLDN14	1.069	SRP14	1.185	LOXL4		ING4	0.022	0	0	0
1.108	LOXL1	1.02	NCKAP5L	1.069	SRP14	1.185	G3BP2		XBP1	0	0.018	0	0
1.108	NRAS	1.019	CAV3	1.069	SRP14-AS1	1.183	FAM189B		DDX5	0	0.048	0	0
1.107	MET	1.019	CAV3	1.069	SRP14-AS1	1.183	FAM189B		TNFSF18	0.621	0	0.617	0.316
1.107	MET	1.019	CDCA5	1.069	SRP14-AS1	1.183	FAM189B		CYLD	0	0	0	0
1.106	PRELP	1.018	BCDIN3D-AS1	1.069	SRP14-AS1	1.182	ABHD12		RTN4	0.457	0.023	0.023	0.457
1.106	PRELP	1.018	BCDIN3D-AS1	1.069	PIM1	1.182	ABHD12		ENG	0.023	0	0	0
1.105	LOC101929331	1.018	BCDIN3D-AS1	1.069	PIM1	1.181	ADAM15		EDAR	0	0	0	0
1.104	CLPB	1.017	PDE11A	1.067	MIR6124	1.181	ADAM15		EGLN2	0.199	0.223	0.098	1.007
1.104	CLPB	1.016	PYGB	1.066	FOXC2	1.181	ADAM15		MARK4	0.028	0	0	0.304
1.104	CLPB	1.015	SIX3-AS1	1.066	CLDN14	1.181	ADAM15		PPP1R13B	0	0	0	0
1.104	CLPB	1.012	P3H4	1.065	TMEM135	1.181	ADAM15		RGCC	0	0.031	0.148	0.031
1.104	NMNAT2	1.011	MIRLET7C	1.065	TMEM135	1.181	ADAM15		GULP1	0.146	0.094	0.094	0.056
1.102	IGSF9	1.011	ACSL3	1.065	TMEM135	1.181	ADAM15		PSMD10	0	0	0	0
1.102	IGSF9	1.011	ACSL3	1.065	TXNDC16	1.181	ADAM15		PPP1R15A	0	0	0	0.04
1.102	KALRN	1.01	SNORD114-16	1.065	TXNDC16	1.181	ADAM15		TIGAR	0	0	0	0
1.102	KALRN	1.009	FNDC8	1.065	KATNAL1	1.181	ADAM15		TNFAIP8L3	0.013	0	0.22	0
1.102	KALRN	1.007	LINC00649	1.064	RBFOX2	1.181	ADAM15		BOK	0	0	0	0
1.101	MCL1	1.007	LOC100507534	1.064	RBFOX2	1.181	ADAM15		UBQLN1	0	0.572	0.593	0.57
1.101	MCL1	1.006	RAD51L3-RFFL	1.064	FOXC2-AS1	1.181	FAM200B		DUSP6	0.829	0.555	0.594	0
1.101	MCL1	1.006	GKN1	1.064	LOC440028	1.181	PPP1R12C		RNF41	0.03	0.03	0.03	0.03
1.101	TFAP2A	1.006	RUVBL1-AS1	1.064	VTI1B	1.181	PPP1R12C		MEGF10	0	0	0	0.218
1.101	SMAD6	1.005	ADAP2	1.064	TCL1B	1.18	G3BP2		SPINK5	0.015	0.015	0.015	0
1.101	SMAD6	1.005	SLA2	1.063	MIR3142	1.18	G3BP2		HSPA1A	0	0	0	0.305
1.101	TFAP2A-AS1	1.005	SLA2	1.063	TMED10	1.179	S100A2		NLRC4	0	0	0.047	0
1.099	OOSP1	1.005	LOC101926926	1.063	ERAP1	1.179	KRTAP5-11		SCRT2	0.122	0	0	0
1.099	MARC1	1.003	MAP3K1	1.063	ERAP1	1.178	ZFPL1		CLPTM1L	0.299	0	0	0.611
1.096	NCKAP5L	1.003	MSRB2	1.062	CHRNB3	1.178	GNG3		STXBP1	0.091	0	0.133	0.027
1.095	BTBD3	1.002	RAD21	1.062	SGSM2	1.177	BSCL2		KRCC1	0	0	0	0
1.094	CIRBP-AS1	1.001	SNORD114-15	1.062	SGSM2	1.177	CARD14		NOX4	0	0	0.058	0
1.094	TMEM55A	1.001	MIR3610	1.062	PITX2	1.177	CARD14		NGB	0	0.012	0.012	0
1.093	SAMD9L	1	TARBP1	1.062	PITX2	1.177	CDCA5		FZD3	0	0	0.435	0
1.093	SAMD9L	1	MIR99A	1.062	PITX2	1.175	AGMAT		HSH2D	0.105	0.14	0.139	0.213
1.093	SAMD9L	0.999	BTD	1.062	PITX2	1.173	BSCL2		CHST11	0	0	0	0
1.093	SAMD9L	0.999	SYBU	1.062	PITX2	1.173	BSCL2		SAV1	0	0	0	0
1.093	SAMD9L	0.999	SYBU	1.06	LOC102724301	1.173	ROBO4		PLK3	0	0.283	0.283	0
1.093	LOC146880	0.999	SYBU	1.06	PIGV	1.173	ROBO4		MAEL	0.994	0.887	0	1.755
1.092	BCDIN3D-AS1	0.999	SYBU	1.06	CTXN2	1.173	CPN2		GOLPH3	0.083	0.083	0.083	0
1.092	BCDIN3D-AS1	0.999	SYBU	1.06	PIGV	1.173	CPN2		GCG	0.023	0.023	0	0
1.092	BCDIN3D-AS1	0.999	BCAR1	1.059	MIR6514	1.172	COL11A2		PDCD4	0	0.168	0	0
1.092	WHAMMP1	0.999	HACL1	1.058	TSR1	1.172	COL11A2		APOE	0.785	0.427	0.428	1.465
1.091	SMIM2-AS1	0.999	HACL1	1.057	APOLD1	1.172	COL11A2		VIL1	0.422	0	0	0
1.089	DNAJB3	0.999	HACL1	1.057	GPR137C	1.172	COL11A2		FAM3B	0.145	0.471	0.145	0.47
1.085	B3GALTL	0.999	HACL1	1.057	PLEKHG1	1.172	FAM195A		PRUNE2	0.016	0.038	0.069	0
1.084	CNGB3	0.999	HACL1	1.056	TMEM179B	1.171	F8A1		GSN	0.801	0.798	0	0.76
1.084	INTU	0.999	C15orf53	1.055	TMEM223	1.17	F8A2		YWHAG	0	0	0	0.2
1.084	OPTC	0.999	CRISPLD2	1.055	MIR3938	1.17	F8A3		HNRNPK	0.292	0.059	0.358	0
1.084	LOC101927630	0.998	HSD17B2	1.053	GRIK1	1.168	ORAOV1		UFM1	0	0	0	0
1.083	TAS2R1	0.998	BTD	1.053	GRIK1	1.168	BHLHE40		DRAM2	0.087	0.053	0.093	0.077
1.082	NCOA5	0.998	BTD	1.053	CAPN9	1.167	GADD45GIP1		CLC	0	0	0	0
1.08	RHBDL2	0.998	BTD	1.052	CAPN9	1.166	VPS51		OLFM4	0	0	0	0
1.08	GBP1P1	0.998	PKIA	1.052	NAV1	1.166	VPS51		SPINK6	0.094	0.268	0.094	0
1.079	ANKRD33B	0.998	PKIA	1.052	NELL2	1.166	CHMP1B		FOXB1	0.086	0.013	0.052	0
1.078	GOLGA8A	0.997	BTD	1.051	MIR6748	1.164	CSNK1A1		APLP1	0.253	0	0	0.056
1.077	CAV1	0.996	SNORD114-14	1.051	DYNLL2	1.164	FCGR2C		IFI6	0.202	0	0	0
1.077	CAV1	0.996	MIR1273A	1.05	SCARNA1	1.164	FCGR2C		FYN	0.2	0.802	0.615	0.391
1.077	KRT5	0.994	CMTM2	1.049	MSRB3	1.16	MRI1		CORO1A	0	0	0	0
1.075	CAV1	0.994	CMTM2	1.049	LOC401585	1.16	MRI1		IRAK1	0	0	0	0
1.075	CAV1	0.993	PDCD1LG2	1.049	MSRB3	1.159	BRINP1		HIPK1	0	0	0	0
1.073	TMEM30C	0.993	LOC101927066	1.049	MSRB3	1.159	TRA2B		MECP2	0.013	0.013	0.013	0
1.073	TMEM30C	0.993	B3GALTL	1.049	MSRB3	1.159	TRA2B		PDPN	0	0	0	0
1.073	ZNF331	0.993	RAD21-AS1	1.048	OSBPL9	1.158	ITPKC		CIDEC	0.045	0.144	0.084	0.407
1.071	PIM1	0.993	SOX1	1.048	OSBPL9	1.157	TAS1R3		INSR	0.136	0	0	0
1.071	PIM1	0.992	SNORD114-7	1.048	OSBPL9	1.154	GPR108		PALB2	0	0.045	0.046	0.386
1.071	URB1	0.992	FSHB	1.048	HMGA1P7	1.152	MIR6514		HSPB1	0	0	0.017	0.538
1.07	URB1-AS1	0.992	FSHB	1.048	NKX2-1	1.15	PLD2		TGFB2	1.03	0.385	1.164	0.744
1.07	C8orf89	0.991	IL12A-AS1	1.047	TGDS	1.15	PLD2		CXCL12	0.283	0.364	0.066	0.148
1.068	SLC37A4	0.991	CCDC26	1.047	TGDS	1.149	PNPLA2		DAD1	0.116	0.601	0.897	0.946
1.066	AKAP17A	0.991	LRRC59	1.047	TGDS	1.148	ADCK4		AXIN1	0	0	0	0
1.066	AKAP17A	0.99	BOD1L2	1.047	TGDS	1.147	ARL17A		FASLG	0.54	0.392	0.488	0.644
1.065	MIR6080	0.99	ANKRD33B	1.046	T1560	1.147	OR4K2		PKP2	0	0.043	0	0
1.064	C1orf185	0.988	LINC00917	1.045	ADCK4	1.146	MAT2A		SBK2	0.12	0	0	0.484
1.064	CLCNKB	0.987	LINC00691	1.044	LOC103611081	1.145	LOC100630918		CITED2	0.617	0.485	0.573	0.496
1.063	SLC4A7	0.987	EPPIN-WFDC6	1.044	LINC01114	1.145	PTTG1		BRCA2	0.046	0	0.046	0.101
1.063	CYTH1	0.987	EPPIN	1.043	CDKL2	1.145	PTTG1		GDF15	0.236	0.374	0.373	0.517
1.061	CCDC153	0.987	EPPIN	1.042	2018-09-07	1.144	NBPF18P		P2RX1	0.036	0	0	0.211
1.06	MIR4253	0.986	G3BP2	1.042	2018-09-07	1.143	PTTG1		BCAP31	0	0	0	0
1.059	SLFNL1-AS1	0.985	G3BP2	1.042	2018-09-07	1.143	SORBS2		TCL1A	0.044	0	0.665	0
1.059	CLCNKB	0.985	G3BP2	1.042	LOC101927666	1.142	GOSR1		TMEM219	0.213	0.213	0	0.188
1.059	LOC100507175	0.985	SBNO2	1.042	DPPA3	1.142	GOSR1		RNF130	0	0	0	0
1.058	CDCP1	0.985	KCNJ1	1.041	IL12A-AS1	1.142	GOSR1		KRT73	0.247	0.08	0.184	0.223
1.058	CDCP1	0.985	KCNJ1	1.041	NELL2	1.141	GCNT4		PRAMEF10	0	0.112	0	0
1.058	HILS1	0.985	KCNJ1	1.041	NELL2	1.141	TMEM223		TICAM2	0	0	0	0
1.058	HILS1	0.985	KCNJ1	1.04	SEC24D	1.141	PPP2R5C		ANKLE2	0	0	0	0
1.058	G6PC	0.984	WFDC6	1.04	SEPT7-AS1	1.141	PPP2R5C		TM2D1	0	0	0	0.131
1.058	G6PC	0.984	SNORD114-13	1.04	SEPT7-AS1	1.141	PPP2R5C		MAPK14	0	0	0	0.177
1.057	KCNH4	0.983	SNORD114-8	1.039	PPP1R8	1.139	GNAL		OSGIN1	0.02	0	0	0.055
1.055	ZNF680	0.983	FLNB	1.039	PPP1R8	1.137	LOC100294145		AAMDC	0.193	0.23	0	0.194
1.055	ZNF680	0.983	FLNB	1.039	PPP1R8	1.137	LOC100294145		PKN2	0.088	0	0	0
1.055	DUXAP8	0.983	FLNB	1.039	ACSL3	1.135	FAM107A		PKN1	0.131	0	0	0.597
1.052	KCNJ12	0.983	FLNB	1.039	ACSL3	1.135	FAM107A		DDX41	0	0	0	0
1.052	POM121L4P	0.983	ARMC1	1.039	UAP1	1.135	GHRH		FEM1B	0	0.209	0.208	0.208
1.052	MIR8077	0.983	ARMC1	1.039	DAOA	1.135	GHRH		SFRP2	0	0	0	0
1.052	LOXL1-AS1	0.982	PIGP	1.039	DAOA	1.134	RRP15		GPX1	0.336	0.053	0.105	0.387
1.052	LOXL1-AS1	0.982	PVT1	1.038	LINC01450	1.133	LRRC15		KAZN	0.269	0.045	1.164	0.332
1.051	HSDL2	0.982	OR13F1	1.038	ABHD12	1.133	LRRC15		GDF2	0	0	0.561	0.248
1.051	HSDL2	0.98	SNORD114-12	1.038	ABHD12	1.133	CSNK1A1		CIDEA	0.178	0.381	0	0.179
1.051	HSDL2	0.98	ZNF331	1.038	TMEM30C	1.133	CSNK1A1		CD28	0.028	0.181	0.471	0.028
1.05	CDCA4	0.98	AARSD1	1.038	TMEM30C	1.133	CSNK1A1		PAFAH2	0.683	0.249	0.071	0.643
1.05	CDCA4	0.979	SNORD114-9	1.038	LTA4H	1.132	SNORD12B		TNFRSF11B	0.453	0.333	0	0
1.049	LOC641746	0.979	LL22NC01-81G9.3	1.038	LTA4H	1.13	SCAMP3		APIP	0.138	0.137	0.318	0.126
1.047	PCDHGA2	0.979	SNORD114-11	1.037	LOC100505795	1.13	SCAMP3		BCL10	0	0	0	0
1.047	PCDHGA2	0.978	SNHG24	1.037	APP	1.13	MYEOV		SMPD1	0.268	0.268	0	0.634
1.047	PROZ	0.978	SNORD114-10	1.037	SNORA59A	1.13	MYEOV		BMP15	0.04	0	0.014	0
1.047	PROZ	0.978	SALL4	1.037	SNORA59B	1.13	MYEOV		PIK3CD	0.295	0.453	0.528	0.067
1.044	LOXL1-AS1	0.977	EPHB6	1.036	FAM50B	1.13	MYEOV		NDUFS3	0.255	0.055	0.195	0.256
1.044	GHRH	0.976	SEC61A1	1.034	LOC100507431	1.13	MYEOV		CRLF1	0	0	0	0.07
1.044	GHRH	0.976	ZNF331	1.034	DAOA	1.13	MYEOV		ERN1	0.033	0.033	0	0
1.042	GPHN	0.976	ZNF331	1.033	MIR548L	1.129	C16orf13		RPTN	0.29	0.315	0	0.141
1.042	GPHN	0.975	PPP2R2A	1.032	ESYT1	1.129	C16orf13		CSRNP2	0.065	0.065	0	0.065
1.042	ADCK4	0.975	KCTD16	1.032	ESYT1	1.129	C16orf13		NME6	0	0	0	0
1.042	CELSR2	0.975	YIPF5	1.032	TMCC2	1.129	C16orf13		RASA1	0	0	0	0
1.042	CASC18	0.975	YIPF5	1.032	LOC100505984	1.129	C16orf13		ALX4	0.018	0.018	0.018	0
1.042	CASC18	0.975	YIPF5	1.029	MIR4668	1.129	C16orf13		ING2	0	0.112	0.329	0.113
1.041	PREX1	0.974	ZNF331	1.028	TMEM14A	1.129	C16orf13		BDKRB2	0	0	0	0
1.04	ANKRD20A4	0.974	LPP-AS1	1.028	PDE1C	1.129	C16orf13		MAG	0	0	0	0
1.039	ARCN1	0.974	SNORD114-20	1.028	LRRC39	1.129	C16orf13		DDX47	0.156	0.027	0.137	0
1.039	ARCN1	0.974	INCENP	1.028	LRRC39	1.129	C16orf13		RPL10	0	0	0	0
1.037	FAM53B-AS1	0.974	INCENP	1.028	LRRC39	1.129	TRIM31		FABP1	0	0.037	0	0
1.037	FAM53B-AS1	0.974	EPHB6	1.028	LRRC39	1.126	MIR4257		SERPINB13	0	0	0	0
1.036	CTRB1	0.974	EPHB6	1.028	PDE1C	1.125	ZGPAT		SIX4	0.393	0.861	1.395	0.555
1.035	FIGNL2	0.971	MIR922	1.028	MON2	1.125	ZGPAT		NUP62	0.064	0.201	0	0.29
1.035	ARHGEF37	0.971	KRTAP10-10	1.028	MON2	1.125	ZGPAT		AURKB	0.646	0	0.056	0.439
1.035	OR10A3	0.969	ARHGEF18	1.028	MON2	1.125	ZGPAT		FGD3	0.088	0.06	0.172	0
1.034	GSG1	0.969	PIGP	1.028	MON2	1.125	C8orf31		OXSR1	0	0	0	0.26
1.034	GSG1	0.969	PIGP	1.028	MON2	1.125	C8orf31		NTF3	0.05	0.582	0.427	0
1.034	GSG1	0.968	RPS10P7	1.024	ELMO1-AS1	1.125	C8orf31		GJB6	0.437	0	0.887	0
1.034	GSG1	0.968	CSF1R	1.024	MYSM1	1.125	ARFRP1		XDH	0	0	0	0
1.033	ESYT1	0.966	NDUFAF7	1.024	N4BP3	1.125	ARFRP1		KDM2B	0.087	0.329	0.014	0.07
1.033	ESYT1	0.966	NDUFAF7	1.022	TNIP1	1.125	ARFRP1		SGPL1	0	0	0.034	0.439
1.033	C9orf89	0.966	CHRNB3	1.022	TNIP1	1.125	ARFRP1		LY86	0	0	0	0
1.033	LOXL1-AS1	0.965	BCAR1	1.022	TNIP1	1.125	ARFRP1		NTRK3	0	0.07	0	0
1.033	LOXL1-AS1	0.965	LOC100506076	1.022	TNIP1	1.125	ARFRP1		SRGN	0	0	0.561	0
1.03	TGFB2	0.965	LOC100506123	1.022	TNIP1	1.125	ARFRP1		VNN1	0	0	0.046	0
1.03	TGFB2	0.965	CEBPZ	1.022	PPP2R5C	1.125	ARFRP1		G0S2	0.573	0.506	0.431	0.696
1.029	SMEK2	0.965	MAGEB17	1.022	PPP2R5C	1.125	ARFRP1		CARD17	0.191	0.585	0.056	0
1.029	SMEK2	0.964	TRIM33	1.022	PPP2R5C	1.125	ARFRP1		HOXA5	0.097	0	0.04	0
1.029	SMEK2	0.964	TRIM33	1.021	ADAP2	1.125	ARFRP1		LY96	0	0	0	0
1.028	GCSAM	0.964	TTC3	1.02	GNG2	1.125	ARFRP1		IVNS1ABP	0	0	0.218	0
1.028	GCSAM	0.963	DNAJA3	1.02	GNG2	1.124	CPEB3		SCIN	0.551	0.172	0.289	0.459
1.028	GCSAM	0.963	DNAJA3	1.02	GNG2	1.124	GNAI2		NTSR1	0.013	0.126	0	0.757
1.028	TRAF3IP2	0.963	DNAJA3	1.019	NELL2	1.122	MIR6772		GIMAP8	0	0	0	0
1.027	GUCY2C	0.963	C4orf36	1.019	ENPP2	1.122	LOC103611081		SIRT1	0	0	0.057	0.279
1.026	MSRB2	0.961	LOC100506844	1.019	ENPP2	1.122	THAP2		TNFRSF11A	0.257	0	0.416	0
1.026	TSPAN4	0.961	LOC101929331	1.019	ENPP2	1.121	APOC1		PNMA1	0	0	0	0.14
1.026	PRR13	0.96	LINC00641	1.018	PDE1C	1.121	DUSP7		PARP2	0	0	0	0
1.026	PRR13	0.96	LINC00641	1.018	PDE1C	1.12	MIR1184-3		ROBO1	0.066	0.2	0.011	0
1.025	GSG1	0.959	ABHD10	1.017	FFAR4	1.12	MIR1184-1		HIF3A	0	0	0	0.178
1.025	GSG1	0.959	ABHD10	1.017	FFAR4	1.12	MIR1184-2		IKBKG	0.073	0	0	0
1.025	GSG1	0.959	ABHD10	1.016	USO1	1.119	MIR7156		DNMT3A	0.46	0.667	0.174	0
1.024	PHACTR1	0.959	ABHD10	1.016	USO1	1.118	ZFC3H1		KLK5	0	0	0	0
1.024	PHACTR1	0.958	TBCE	1.016	LOC100506076	1.118	ARHGEF37		NOS1AP	0.305	0.305	0.305	0.161
1.023	WFDC8	0.958	TBCE	1.016	LOC100506123	1.117	ARFRP1		TMEM14A	1.973	0.564	1.028	0.895
1.023	WFDC8	0.958	TBCE	1.015	MAT2A	1.116	MIR6791		KRT75	0.695	0.637	0.12	0.12
1.023	VRK1	0.958	TBCE	1.015	MEPE	1.116	SNORD12		FANK1	0	0	0	0
1.023	FSHB	0.957	RHOU	1.015	MEPE	1.115	MIR6748		ELMO1	0.6	0.472	0.813	0.521
1.023	FSHB	0.957	CEBPD	1.015	MEPE	1.113	ATXN3		NCSTN	0	0	0	0
1.021	EXO5	0.956	CD160	1.015	MEPE	1.113	ATXN3		SCN2A	0.328	0.023	0.584	0
1.021	HCRT	0.956	CD160	1.014	LOC100630918	1.113	ATXN3		IER3	0.274	0.153	0.681	0.644
1.02	MIR3156-2	0.956	NUP93	1.013	MAP3K1	1.113	ATXN3		MT-RNR2	0	0	0	0
1.02	OLFML2A	0.955	PTGES3L-AARSD1	1.011	LINC00917	1.113	ATXN3		EPHA6	0	0	0	0.082
1.019	RPL11	0.954	SHQ1	1.011	MEPE	1.113	ATXN3		TIAM2	0.103	0.103	0.368	0.103
1.019	RPL11	0.954	LOC101929596	1.011	HNRNPA1P33	1.113	ATXN3		CTSH	0.013	0.042	0	0
1.019	LINC01569	0.953	FAM221A	1.009	PRSS23	1.113	ATXN3		PPIF	0	0.443	0	0
1.019	TSPAN4	0.953	FAM221A	1.009	PRSS23	1.113	ATXN3		MDK	0	0.163	0	0.163
1.019	TSPAN4	0.953	FAM221A	1.009	PRSS23	1.113	ATXN3		TFAP2B	0	0	0	0
1.019	TSPAN4	0.953	FAM221A	1.009	PRSS23	1.113	ATXN3		SIAH1	0	0	0.448	0
1.018	TSPAN4	0.953	ADAMTS1	1.009	PRSS23	1.113	ATXN3		API5	0	0	0	0
1.018	TSPAN4	0.953	CORO7	1.009	PRSS23	1.113	ATXN3		DEPTOR	0.02	0.227	0.227	0.216
1.018	TSPAN4	0.953	CORO7	1.007	LOC100506076	1.113	ATXN3		ZNF420	0.178	0	0	0
1.017	MMP12	0.953	CORO7-PAM16	1.006	GPR19	1.113	ATXN3		BCL2L14	0.11	0	0.606	0.194
1.017	POLR2L	0.953	CORO7	1.006	LOC401177	1.113	ATXN3		CHIA	0.157	0.017	0.085	0
1.016	TGFB2-AS1	0.953	LOC100506281	1.005	TUBB	1.113	ATXN3		TYRO3	0.031	0.015	0.053	0.085
1.016	ZNF483	0.952	RFPL2	1.005	TUBB	1.113	ATXN3		ERC1	0	0.09	0	0
1.016	ZNF483	0.952	USO1	1.005	TUBB	1.113	ATXN3		FURIN	0	0.519	0	0
1.015	LOC100996255	0.952	USO1	1.004	ABHD4	1.113	ATXN3		IFIT2	0	0.015	0	0
1.015	PLEKHF2	0.951	NOP16	1.004	C6orf118	1.113	ATXN3		UACA	0.024	0.848	1.403	0
1.015	ZNF738	0.951	NOP16	1.004	OSTF1	1.113	ATXN3		FGFR2	0	0.365	0	0
1.014	C15orf53	0.951	NOP16	1.004	PCNX	1.113	ATXN3		CAMK1D	0.06	0.425	0	0
1.013	PCDHGA1	0.951	NOP16	1.003	POGLUT1	1.113	ATXN3		TMC8	0.039	0.054	0.027	0
1.013	PCDHGA1	0.951	NOP16	1.003	POGLUT1	1.113	ATXN3		ZMAT1	0	0	0	0.112
1.012	RFX6	0.951	NOP16	1.003	MDC1	1.113	ATXN3		SARM1	0.014	0	0.014	0.04
1.01	SLC31A1	0.951	NOP16	1.002	TUBB	1.113	ATXN3		WNK3	0	0	0	0.217
1.009	HDAC9	0.951	HIGD2A	1.002	TUBB	1.113	ATXN3		RBCK1	0	0	0.034	0
1.009	MLN	0.951	CTRB2	1.002	TUBB	1.113	ATXN3		SOX10	0	0.097	0	0
1.009	MLN	0.951	CDR2	1.002	TUBB	1.113	ATXN3		CASP12	0.523	0.593	0.522	0
1.009	MLN	0.95	LINC00518	1.002	BNC2	1.113	ATXN3		MAGEA3	0.205	0.206	0	0
1.008	ALPK3	0.95	RAD51D	1.001	MED20	1.112	ZNF587		NR4A2	0.581	0.911	0.862	0.583
1.007	FKBP15	0.95	RAD51D	0.999	BYSL	1.112	ZNF587		NPM1	0	0.026	0.026	0
1.006	TDRD1	0.95	RAD51D	0.999	LOC101927640	1.112	CARD14		POLB	1.178	0.013	0.67	0.047
1.004	SBNO2	0.95	RAD51D	0.999	MIER3	1.111	CA10		GPI	0.018	0.093	0	0.093
1.003	ILDR2	0.95	RAD51D	0.999	MIER3	1.111	LOC100286922		PYGL	0.282	0.618	0.71	0.506
1.003	MIR5197	0.949	SNORD114-21	0.999	MIER3	1.111	LOC100286922		ENO1	0.269	0.301	0.269	0.302
1.001	G3BP2	0.948	LOC101927431	0.998	LRTM1	1.111	LOC100286922		CEACAM5	0.028	0.012	0.012	0.028
1.001	G3BP2	0.947	OR51B6	0.996	LIFR	1.11	CREM		CD2	0	0	0.323	0
1	G3BP2	0.946	LINC01299	0.996	MIR5092	1.11	CREM		S100A9	0	0.099	0	0
0.999	RAPGEF1	0.946	WFDC8	0.994	CMTM2	1.108	CORT		ADAM17	0	0.577	0.27	0.101
0.996	MIR4257	0.946	WFDC8	0.994	CMTM2	1.108	WDR41		BTG2	0.039	0	0	0
0.994	MIR4459	0.945	EIF3D	0.994	NMRK1	1.106	KRTAP5-10		YBX3	0	0.046	0	0
0.994	PFAS	0.945	BCAR1	0.994	NMRK1	1.105	MIR4645		AHI1	0	0	0	0
0.994	MAEL	0.945	BCAR1	0.994	NMRK1	1.104	LOC101929331		PIM3	0.089	0	0	0.088
0.993	DYNC2H1	0.944	MIR4269	0.992	ABCA4	1.104	SESN2		SHISA5	0.071	0	0	0.04
0.993	DYNC2H1	0.944	PARVA	0.992	PNMT	1.103	GUCA1A		EDA2R	0	0	0	0
0.99	NPPA	0.944	BCAR1	0.992	MIR548U	1.101	SCT		NTRK1	0.131	0.043	0.043	0.103
0.989	ARHGAP29	0.944	PTGES3L	0.991	FOXL1	1.101	FAM136A		CAPNS1	0.548	0	0	0.152
0.988	TMLHE-AS1	0.944	PTGES3L	0.99	B3GALTL	1.101	LOC101929555		PLCG2	0	0	0	0
0.988	LOC101927830	0.944	PTGES3L-AARSD1	0.99	LRRC59	1.1	OR10A3		ARHGAP10	0	0	0	0
0.988	LOC104968399	0.944	PTGES3L	0.989	KCND3-IT1	1.099	ZGPAT		PRKCD	0	0	0	0
0.987	PDZD3	0.942	RUNDC1	0.988	PNMT	1.098	SCARNA4		EEF1A2	0	0	0	0
0.987	PDZD3	0.941	CAPG	0.987	LINC01100	1.097	FAM186A		CSNK2A1	0.015	0	0	0
0.987	PDZD3	0.939	NT5DC3	0.987	MYO18A	1.096	DRD4		DNASE2B	0.061	0.373	0.385	0.396
0.987	LINC00691	0.938	LINC00862	0.987	MYO18A	1.096	TMEM179B		RFFL	0.583	0.676	0	0
0.987	LOC104968399	0.936	ZNF572	0.987	KRTAP10-7	1.095	RPL11		IDO1	0.017	0	0	0
0.986	MMP13	0.936	MYO16	0.986	LINC01525	1.095	RPL11		JUP	0.013	0.674	0	0.492
0.986	LRRC59	0.935	CEACAM8	0.986	POLR2E	1.095	KCNIP1		DCC	0	0.173	0.173	0
0.986	TRIM33	0.935	ECD	0.982	MTUS1	1.095	MIR4525		CSRNP3	0.096	0.367	0.512	0
0.986	TRIM33	0.935	ECD	0.982	MTUS1	1.094	CCND3		STRADA	0.089	0.089	0.089	0
0.985	LINC00917	0.935	ECD	0.982	PTAR1	1.094	CCND3		ADIPOQ	0	0	0	0.062
0.984	FAM200B	0.935	ECD	0.981	MAP4K3	1.094	CCND3		UBE2V2	0	0.314	0.296	0.296
0.983	S100A16	0.934	FAM149B1	0.981	MAP4K3	1.093	NPTN		ITSN1	0.097	0.036	0.133	0.085
0.983	AFAP1L2	0.934	LOC101927588	0.978	PSMA5	1.093	NPTN		ING5	0	0	0	0
0.983	AFAP1L2	0.934	TRABD2A	0.978	PSMA5	1.093	NPTN		MAP3K21	0	0	0	0
0.983	AFAP1L2	0.934	TRABD2A	0.978	PSMA5	1.093	NPTN		DAPK1	0	0	0	0
0.982	HCST	0.933	TATDN1	0.978	PSMA5	1.092	CHRNG		PLK1	0	0	0	0.086
0.982	HCST	0.933	TATDN1	0.978	RPSAP9	1.092	ZNF331		CTNNBL1	0.02	0.202	0	0
0.981	ZNF91	0.933	TATDN1	0.977	LOC728730	1.092	SNRPG		EMC4	0	0	0	0
0.981	ZNF91	0.933	SLC31A2	0.976	KCNJ1	1.09	C9orf135-AS1		MAGI3	0	0	0.365	0.293
0.981	ZNF331	0.932	NDUFB9	0.976	KCNJ1	1.089	C9orf135		WNT7A	0.035	0.096	0	0.035
0.979	NPPA-AS1	0.932	NDUFB9	0.976	KCNJ1	1.088	LILRP2		WNT10B	0	0	0	0
0.978	MYL12B	0.932	NDUFB9	0.976	KCNJ1	1.087	DBF4B		E2F3	0.483	0.231	0.495	0.232
0.977	ZNF331	0.932	LINC01548	0.975	OPRM1	1.087	DBF4B		ZBTB16	0	0	0	0
0.977	ZNF331	0.931	MIR4459	0.975	OPRM1	1.087	DBF4B		PRKCZ	0.22	0	0	0.294
0.976	MIR107	0.931	CD40	0.975	F3	1.087	FHOD1		PTGFR	0.04	0	0	0
0.976	LINC00671	0.931	CD40	0.975	F3	1.087	OLFML2A		CNTFR	0	0	0	0
0.976	CHRNG	0.931	CD40	0.974	TCAP	1.086	GNG2		NCOA1	0	0	0	0
0.976	EXPH5	0.931	CD40	0.974	UGT1A4	1.086	GNG2		CDK1	0.117	0.096	0.096	0
0.975	ZNF331	0.931	MIR4757	0.973	ERLIN1	1.086	GNG2		CD248	0.655	0.38	0.039	0.58
0.974	CELA2A	0.928	SCYL1	0.973	SLC2A11	1.085	SLU7		NPY5R	0.054	0.054	0	0.19
0.974	MIR554	0.928	SCYL1	0.971	MITF	1.083	LOC101927730		GDF5	0	0.439	0.229	0
0.974	GHDC	0.927	INVS	0.97	ERLIN1	1.083	MCOLN3		RAF1	0.153	0.274	0.125	0.175
0.974	GHDC	0.927	INVS	0.97	CSF1R	1.083	MCOLN3		GADD45A	0.238	0	0.372	0.238
0.974	STARD3	0.927	INVS	0.97	LINC00282	1.083	MIR8056		UNG	0.094	0.034	0.034	0.034
0.974	STARD3	0.927	ERP44	0.97	LINC00282	1.082	INTU		SLC5A8	0	0	0	0
0.974	STARD3	0.926	SNORD114-22	0.969	TAAR5	1.08	PFAS		DRAM1	0	0	0	0
0.973	INHBE	0.925	GSG1	0.969	MIR548AP	1.079	ARL2BP		NGEF	0	0	0.013	0
0.973	FBLL1	0.925	GSG1	0.969	MITF	1.079	C2orf88		MLKL	0	0	0.417	0.418
0.972	DPYSL2	0.925	GSG1	0.969	GGCX	1.079	POMT1		ZC3H8	0	0.599	0	0
0.97	CYTH1	0.923	LINC01473	0.969	GGCX	1.079	POMT1		HCLS1	0	0	0.012	0
0.97	MYL12A	0.921	TTR	0.968	TRPM8	1.079	POMT1		AATF	0	0	0	0
0.97	MYL12A	0.921	MRPL44	0.967	LOC100129534	1.079	POMT1		SFPQ	0	0	0	0
0.969	ZKSCAN1	0.921	MIR4678	0.966	MYO16	1.079	POMT1		NOD1	0	0	0.058	0.029
0.969	ZKSCAN1	0.92	NKX6-1	0.966	ANTXR1	1.077	GPRC5D		ITGA6	0	0	0	0
0.969	ZKSCAN1	0.919	OSTF1	0.966	ANTXR1	1.076	ARHGEF39		SIN3A	0.028	0.028	0.063	0.22
0.969	CHRNB3	0.918	LOC101927987	0.966	ANTXR1	1.075	CA10		TMBIM6	0.141	0.064	0.119	0
0.969	LOC104968399	0.918	LOC100506675	0.966	EGFR	1.075	GOLT1A		TLR3	0	0	0.135	0
0.969	IL36RN	0.918	LOC100506675	0.966	EGFR	1.075	PLVAP		KIT	0	0	0.193	0
0.968	MYL12A	0.917	LOC100505736	0.966	EGFR	1.075	SLC9A5		PRNP	0.162	0.162	0.163	0.162
0.968	DPYSL2	0.917	IZUMO1R	0.966	EGFR	1.074	MYO16		KDR	0.195	0	0	0
0.966	IL36RN	0.917	LOC102724849	0.965	GBP1P1	1.073	FAM221A		MECOM	0	0.012	0.051	0.051
0.966	GIGYF2	0.917	MPDZ	0.962	LOC100379224	1.073	FAM221A		SKP2	0.508	0	0	0
0.966	GIGYF2	0.917	MPDZ	0.961	BCL7A	1.073	FAM221A		ATM	0.021	0	0	0
0.966	GIGYF2	0.917	MPDZ	0.961	BCL7A	1.073	FAM221A		BIK	0	0	0	0
0.966	GIGYF2	0.916	KIAA1958	0.961	ZNF225	1.073	NR6A1		OXR1	0.057	0.264	0.386	0
0.966	GIGYF2	0.916	KIAA1958	0.96	LINC00641	1.073	NR6A1		ITGB3BP	0.256	0.04	0.04	0.051
0.966	GIGYF2	0.916	KIAA1958	0.96	LINC00641	1.073	NR6A1		NAA16	0.061	0.061	0.233	0
0.966	GIGYF2	0.915	DYNC2H1	0.959	LOC101929331	1.073	NOP14-AS1		PSENEN	0.072	0.071	0	0.071
0.964	AARSD1	0.915	DYNC2H1	0.958	CEACAM8	1.072	WFIKKN1		FMN2	0.371	0.073	0.013	0
0.964	MYOF	0.915	MINPP1	0.956	SLC25A37	1.069	IL21R-AS1		SST	0	0.323	0	0
0.964	MYOF	0.915	MINPP1	0.956	LIMK2	1.069	LOC339666		PLK2	0.135	0.506	0.384	0.415
0.964	CTC1	0.914	FN1	0.956	KLF3-AS1	1.068	CA10		BMP8B	0.527	0	0	0.607
0.964	CTC1	0.914	FN1	0.955	SNORD103A	1.068	CGN		MINK1	0	0.334	0	0.603
0.961	GSC	0.914	FN1	0.955	SNORD103B	1.066	MIR5787		CD74	0.184	0	0	0
0.961	MIR4293	0.914	FN1	0.955	GM2A	1.065	IL19		KLLN	0	0.232	0.052	0.181
0.961	IL36B	0.914	FN1	0.955	GM2A	1.065	SYT2		S100B	0	0	0	0
0.961	IL36B	0.914	FN1	0.955	TMPRSS6	1.065	CTC1		PTTG1IP	0	0	0	0.678
0.96	MYL12B	0.913	GSDMC	0.955	ERGIC2	1.065	CTC1		RYBP	0.436	0	0.436	0.449
0.96	LINC00641	0.913	ST8SIA6	0.955	LOC493754	1.063	PSRC1		SFRP1	0.377	0.719	0.603	0.657
0.96	LINC00641	0.913	ANKRD54	0.955	LOC493754	1.063	PSRC1		MAP3K9	0	0	0.029	0
0.959	MCFD2	0.913	ANKRD54	0.955	LOC493754	1.063	PSRC1		PRAMEF33	0	0	0	0
0.959	MCFD2	0.912	OSBPL3	0.955	LOC493754	1.059	LINC00514		GPLD1	0.018	0	0	0
0.958	TMEM194B	0.912	MIR658	0.955	LOC493754	1.059	ADCK4		JAK3	0	0	0	0
0.958	SAMM50	0.911	NR4A2	0.955	LOC493754	1.058	RAI14		JAK2	0.242	0	0	0.264
0.957	ZDHHC3	0.91	SERP1	0.955	LOC493754	1.058	PTDSS2		STPG1	0.538	0.53	0.537	0.967
0.957	ZDHHC3	0.91	BBOX1-AS1	0.955	LOC493754	1.057	PHF2		NKX3-2	0	0.357	0	0.377
0.956	MYL12B	0.909	GPR142	0.954	SPON2	1.057	VAV1		KRT83	0.064	0.022	0	0
0.955	EXOSC7	0.909	EIF2A	0.954	LOC100130872	1.057	VAV1		DNASE1	0	0	0	0
0.955	EXOSC7	0.909	NMRK1	0.954	FAM221A	1.057	VAV1		PIAS4	0.129	0.128	0.128	0.128
0.955	MATN4	0.909	NMRK1	0.954	FAM221A	1.056	GNAI2		SYCE3	0	0	0	0
0.955	TYROBP	0.909	NMRK1	0.954	FAM221A	1.056	GNAI2		SERINC3	0	0.037	0	0
0.955	TYROBP	0.908	RPL7	0.954	FAM221A	1.055	DPYD-AS2		EN1	0	0	0	0
0.955	TYROBP	0.905	SNORA38B	0.953	SHQ1	1.055	FKBPL		ASCL1	0	0.023	0	0
0.955	TYROBP	0.904	SNORD114-23	0.953	LOC90768	1.054	HSDL2		ADA	0	0.056	0	0
0.955	TYROBP	0.904	GNLY	0.953	LOC90768	1.054	HSDL2		PRDX3	0.019	0	0	0
0.954	C1QTNF5	0.904	GNLY	0.952	HIBCH	1.054	HSDL2		PRDX5	0	0.142	0.142	0.142
0.954	MFRP	0.904	GNLY	0.952	HIBCH	1.052	SNORA80E		ERP29	0	0	0	0.189
0.954	LINC01517	0.903	LINC00900	0.951	NDUFAF7	1.052	LPAR3		MAP3K10	0.293	0.29	0.37	0.372
0.954	FAM221A	0.903	MIR4514	0.951	NDUFAF7	1.051	MIR581		TEK	0	0	0.767	0
0.954	FAM221A	0.902	PHOSPHO1	0.951	LILRP2	1.051	MIR4512		EP300	0	0	0	0.114
0.954	FAM221A	0.902	PHOSPHO1	0.951	VPS37A	1.05	WDR90		GSDMC	0	0.913	0	0
0.954	FAM221A	0.901	TGOLN2	0.951	VPS37A	1.05	C22orf39		HYOU1	1.144	0	0	0.361
0.954	NOP16	0.901	TGOLN2	0.951	CNOT7	1.05	C22orf39		BNIPL	0.051	0	0	0.463
0.954	NOP16	0.901	TGOLN2	0.951	CNOT7	1.05	PCDHGA2		SLC40A1	0	0	0.235	0
0.954	NOP16	0.901	TGOLN2	0.951	CEBPZ	1.05	PCDHGA2		ELMO2	0.867	0.512	0.536	0.249
0.954	NOP16	0.9	SLC2A11	0.949	GLIPR1L1	1.049	MTHFSD		BNIP3	0	0	0	0
0.954	NOP16	0.899	LINC01525	0.949	GLIPR1L1	1.049	WNT9B		BNIP2	0	0	0	0
0.954	NOP16	0.899	KRTAP10-9	0.948	ITM2B	1.048	ZSCAN16-AS1		BNIP1	0.017	0	0.017	0
0.954	NOP16	0.898	MDH1	0.948	KRTAP5-11	1.048	ZSCAN16-AS1		ABR	1.403	1.353	1.616	1.473
0.954	HIGD2A	0.898	WDPCP	0.948	EYA4	1.048	MTHFSD		DAPL1	0	0	0	0
0.951	MIR1305	0.897	ROPN1L	0.948	EYA4	1.048	MTHFSD		TAF10	0	0	0	0
0.951	DYNLL2	0.897	ROPN1L	0.948	EYA4	1.048	MTHFSD		FOXC1	0.045	0.046	0.932	0.046
0.95	LOC101927666	0.897	ROPN1L-AS1	0.946	CAST	1.048	MTHFSD		AIM2	0	0.474	0.473	0.093
0.95	KRTAP5-11	0.896	VPS51	0.946	CAST	1.048	MTHFSD		MYCNOS	0	0	0	0
0.949	AFG3L2	0.896	VPS51	0.945	SLC2A11	1.048	MTHFSD		TRAF2	0	0	0	0
0.949	MATN4	0.895	MDH1	0.945	CAST	1.048	LINC00518		TRAP1	0	0	0	0
0.948	MATN4	0.895	MDH1	0.944	LOC101929705	1.047	NAA20		AIMP1	0.096	0.096	0	0.112
0.948	MYL12A	0.895	RARB	0.944	EYA4	1.047	NAA20		RASGRF2	0	0	0	0
0.948	MIR8056	0.894	ILDR2	0.944	EYA4	1.047	FLJ30679		SERPINB9	0.074	0	0	0.549
0.947	MIR4715	0.894	MYLK	0.944	OR13C4	1.046	MIR4459		IL6ST	0	0	0.365	0.365
0.946	USO1	0.894	MYLK	0.943	CCDC130	1.046	NR2F6		TPD52L1	0	0	0	0
0.946	USO1	0.894	MYLK	0.941	EPS15	1.046	ZKSCAN4		HYAL2	0.013	0.013	0	0.056
0.945	SEC14L1	0.894	MYLK	0.941	FER1L6-AS2	1.045	ADAMTSL4		FAP	0	0	0	0
0.945	SNHG20	0.893	MINPP1	0.94	ERAP1	1.045	ADAMTSL4		LGALS3	0.648	0.13	0	0.649
0.945	CELA2B	0.892	KCNJ1	0.938	KLF3	1.045	ADAMTSL4		IGFBP3	0.434	0.069	0.32	0.351
0.945	C10orf11	0.89	GALR3	0.936	SLC2A11	1.045	ADAMTSL4		GRIN2A	0	0.044	0	0
0.943	CD151	0.889	MIR6515	0.936	SLC2A11	1.044	GPR116		TNFRSF10C	0.189	0	0	0.101
0.943	CD151	0.887	MAEL	0.936	SLC2A11	1.044	LOC102467073		UNC13B	0	0	0	0.058
0.943	CD151	0.887	RAD51-AS1	0.936	SLC2A11	1.044	MFSD10		MSTN	0.645	0.5	0	0.034
0.943	CD151	0.887	RAD51	0.936	MIR8080	1.043	LOC100128076		NRP1	0	0	0	0
0.943	CSRP1	0.887	RAD51	0.935	RGMB-AS1	1.043	DDX39A		MAP3K12	0.45	0.089	0	0.088
0.943	CSRP1	0.887	RAD51	0.935	RPL10A	1.043	DDX39A		STX4	0	0.424	0.269	0
0.943	ABCA4	0.887	RAD51	0.934	ORC2	1.043	MIR4253		TNFRSF10B	0.049	0	0	0.389
0.943	PCIF1	0.885	SNORD114-24	0.934	ORC2	1.042	PREX1		POU4F2	0	0	0.26	0
0.943	MCOLN3	0.885	KIAA0226	0.934	DIO3OS	1.042	ANKRD33B		TERT	0.168	0	0	0.328
0.943	MCOLN3	0.883	SDR42E1	0.933	ELAC1	1.041	SNAPC5		SLC9A3R1	0.194	0.248	0.351	0.195
0.942	NCS1	0.882	LMBR1L	0.933	MIR4636	1.04	PDCD6		PDCD5	0	1.082	0.475	0.606
0.942	GDPD1	0.882	LMBR1L	0.932	HTR2A	1.04	PDCD6		AKAP13	0	0	0	0.077
0.942	GDPD1	0.882	LMBR1L	0.932	HTR2A	1.04	PDCD6		CTSL	0.125	0.722	0	0.125
0.942	GDPD1	0.881	LOC101927178	0.932	FOXC1	1.04	PDCD6		TCF7L2	0.08	0.638	1.17	0.685
0.942	SEC14L1	0.88	RDH10	0.93	GNGT2	1.04	PDCD6		SOX8	0	0	0.027	0.47
0.942	CEP55	0.88	CSNK1A1	0.929	ABI3	1.04	PDCD6		SIK1	0.264	0.264	0.241	0.279
0.941	CEP55	0.878	ZHX3	0.929	ABI3	1.039	CDHR5		RABEP1	0	0	0	0
0.941	NXF1	0.878	KCNJ5	0.929	LARP4	1.039	CDHR5		RAC1	0.338	0	0.185	0.338
0.941	NXF1	0.877	NELL2	0.929	LARP4	1.039	CDHR5		PTPA	0	0	0	0
0.941	AGT	0.876	CALR	0.929	LARP4	1.039	OSMR-AS1		CNTF	0.578	0.529	1.231	0.576
0.941	UBLCP1	0.876	LOC100507065	0.929	LARP4	1.039	GNAI2		TEX11	0	0	0	0
0.941	LINC00919	0.876	LOC100507065	0.929	LARP4	1.039	GNAI2		NONO	0	0	0	0
0.941	LINC01366	0.876	LOC100507065	0.929	LARP4	1.039	OSMR		SUPV3L1	0	0	0.016	0
0.941	LINC01366	0.876	LOC100507065	0.929	LARP4	1.039	APOL3		RHBDD1	0.541	0.541	0	0
0.941	LINC01366	0.876	CELA2B	0.928	GNGT2	1.039	APOL3		HRK	0.06	0	0	0.06
0.941	SCARNA16	0.876	RESP18	0.928	GNGT2	1.039	APOL3		LGALS9	0.133	0	0.133	0.133
0.941	C7orf57	0.875	ZFAT	0.928	GNGT2	1.039	APOL3		PSEN2	0	0	0	0
0.941	C7orf57	0.875	ZFAT	0.927	RRP15	1.038	ABHD4		PSEN1	0	0	0	1.256
0.941	C7orf57	0.875	ZFAT	0.927	TMPRSS6	1.038	CTRB1		HAX1	0	0	0	0
0.94	MIR6516	0.875	MIR3675	0.927	TMPRSS6	1.038	OSMR		MICAL1	0	0	0.879	0.814
0.94	OR2G2	0.874	TNS3	0.926	TCF12	1.037	NAA20		KRT37	0.014	0.014	0.014	0
0.939	CSRP1	0.872	HNF4G	0.926	LEMD3	1.036	CTPS1		CREBBP	0.734	0.755	0.754	0.815
0.938	LOC102467079	0.871	DNAJB2	0.926	LEMD3	1.036	CTPS1		RB1CC1	0	0	0	0
0.938	SEH1L	0.871	DNAJB2	0.926	MIR5682	1.035	LOC101926962		DPF2	0.508	0.014	0.014	0.509
0.938	SEH1L	0.87	CLDN23	0.926	AOC4P	1.034	STOML3		DPF1	0.329	0.26	0.067	1.682
0.938	TMEM262	0.87	SLC2A11	0.925	PCDH7	1.034	STOML3		DNASE2	0.152	0.153	0.051	0.275
0.938	TMEM262	0.868	RELL1	0.925	PCDH7	1.032	ESYT1		HDAC2	0.012	0	0	0
0.936	NOL4L	0.868	RELL1	0.925	PCDH7	1.032	ESYT1		KRT35	0	0	0	0.05
0.935	FAM50B	0.866	IL7R	0.925	PCDH7	1.032	FAM159A		PARK7	0.363	0.385	0.313	0.308
0.935	TTC7A	0.866	IL7R	0.924	LOC102724201	1.031	RPSAP9		AGAP2	0	0	0	0
0.935	TTC7A	0.866	FARSA	0.924	LOC102724201	1.029	MRPL44		RYR2	0	0	0	0
0.935	TTC7A	0.866	CAPG	0.924	LOC102724201	1.029	IGFBPL1		HCAR2	0.053	0.052	0.034	0.052
0.935	RAPGEF1	0.866	CAPG	0.924	FAM53B-AS1	1.028	GRIFIN		KRT12	0.046	0.046	0.046	0.046
0.933	LOC100132356	0.865	VCAM1	0.924	FAM53B-AS1	1.027	ASCC2		MRPL41	0	0	0	0
0.933	LOC100506639	0.865	VCAM1	0.923	CLEC12B	1.027	ASCC2		GML	0.509	0	0.121	0.497
0.932	LOC101927431	0.865	VCAM1	0.923	CLEC12B	1.027	GBX2		SIRT2	0.489	0	0	0.109
0.932	C19orf24	0.865	TRIB1	0.922	KALRN	1.027	GBX2		WT1	0	0.067	0	0.242
0.932	CSRP1	0.865	CAND1.11	0.922	KALRN	1.027	LINC01520		RHOT2	0.311	0	0.493	0.908
0.931	CEACAM8	0.865	PLEKHG4	0.922	KALRN	1.026	ATF6B		PRKD1	0	0	0	0
0.93	LOC648987	0.864	SNX19	0.922	OPRM1	1.026	ATF6B		PEA15	0	0.082	0.253	0.253
0.928	MISP	0.864	SNX19	0.922	OPRM1	1.026	LOC101928600		PDK2	0.865	0.047	0	0.285
0.927	EPHB2	0.864	NELL2	0.921	GOLGA8N	1.026	RNF144B		PDK1	0	0	0	0
0.927	EPHB2	0.864	NELL2	0.921	TMEM39A	1.025	IFT46		PDCD1	0	0	0	0
0.927	ADAMTSL4	0.864	ARHGAP29	0.921	TMEM39A	1.025	IFT46		DFFB	0	0	0	0
0.927	ADAMTSL4	0.863	DHH	0.921	SPRED1	1.025	TRNP1		DNAJC10	0	0	0	0
0.927	ADAMTSL4	0.862	BBOX1-AS1	0.92	FAM20A	1.025	RBM26		DDIT3	0.139	0	0.028	0.127
0.927	ADAMTSL4	0.862	BBOX1-AS1	0.919	DIDO1	1.025	RBM26		UBC	0	0	0	0
0.926	ISLR2	0.862	DCDC2C	0.919	DIDO1	1.025	RBM26		UBB	1.178	1.127	1.231	0.609
0.926	ARMC1	0.862	EPB41L4B	0.919	DIDO1	1.025	C10orf126		CSTA	0	0	0	0
0.926	ARMC1	0.862	EPB41L4B	0.919	MCFD2	1.024	RBM26-AS1		CD44	0.867	1.412	0.717	0.895
0.925	EPSTI1	0.862	CSNK1A1	0.919	MCFD2	1.023	PHACTR1		EN2	0	0.268	0.268	0.268
0.925	EPSTI1	0.862	CSNK1A1	0.918	SIKE1	1.023	PHACTR1		FGB	0.016	0.016	0.147	0
0.925	ISLR2	0.862	CSNK1A1	0.918	SIKE1	1.021	GPS2		LGALS1	0	0	0	0
0.924	S100A14	0.862	TRIB1	0.918	SIKE1	1.02	MIR7641-2		FCMR	0	0	0	0
0.924	S100A11	0.861	TMEM123	0.918	SIKE1	1.02	GGCX		ITGA1	0	0	0	0
0.923	MIR4315-2	0.861	SIX4	0.917	CDADC1	1.02	GGCX		DLX1	0	0.097	0.012	0
0.923	MIR4315-1	0.86	SLC2A11	0.917	CDADC1	1.02	MIR554		TFAP4	0.567	0.235	0.313	0.769
0.923	TTR	0.86	SLC2A11	0.917	CDADC1	1.02	YY1AP1		DIDO1	0.746	0.567	0.919	0.568
0.922	FAM76B	0.86	SLC2A11	0.916	TIMD4	1.02	ENPP2		ACTN1	0	0.285	0	0
0.922	MAP3K1	0.86	SLC2A11	0.916	TIMD4	1.02	ENPP2		EIF2AK2	0.56	0.558	0.104	0.946
0.921	OSTF1	0.86	SNORD114-25	0.916	RGMB	1.02	ENPP2		TCHP	0.059	0.262	0.039	0.039
0.921	KRT222	0.859	PHLDB2	0.915	GID8	1.02	EIF5A		SOX7	0	0.045	0	0
0.92	GPRC6A	0.859	SEC14L1P1	0.915	NREP	1.02	CLPTM1		FNIP2	0.153	0	0	0
0.92	GPRC6A	0.859	PLEKHG4	0.914	TMEM61	1.018	MFSD10		PIM2	0.015	0.016	0	0
0.92	GPRC6A	0.858	HP09053	0.914	ST8SIA6	1.018	ABCA4		RTKN	0.034	0.044	0.244	0.034
0.919	GM2A	0.857	MIR5092	0.914	DIDO1	1.018	PRRT1		ALKBH7	0	0	0	0
0.919	GM2A	0.857	LOC729218	0.914	DIDO1	1.017	GNGT2		LMNA	0.442	0.153	0.153	0.578
0.919	ISLR2	0.856	CEP55	0.914	DIDO1	1.017	GNGT2		KRT6A	0.704	0.286	0.47	0.511
0.918	KRT74	0.855	CYP7B1	0.914	CORT	1.017	GNGT2		KRT14	0	0	0	0.108
0.917	C16orf97	0.855	ZBTB6	0.913	OSBPL3	1.016	ZNF331		CRYAB	0	0.138	0.155	0
0.917	LOC101927987	0.855	CEP55	0.913	LOC100652768	1.015	BST2		GSTP1	0.239	0.238	0	0.267
0.916	VPS51	0.855	WIPI1	0.913	LINC00312	1.014	MVB12A		BUB1B	0.318	0.032	0.032	0.033
0.916	VPS51	0.855	MATN4	0.912	MNAT1	1.014	BISPR		TMEM79	0	0	0	0.191
0.916	ISLR2	0.854	TMEM61	0.912	MNAT1	1.014	BISPR		SKIL	0	0.028	0.042	0
0.915	LOC283731	0.854	PUM1	0.912	FAM159A	1.013	PI4K2A		KRT76	0.035	0.035	0.035	0.185
0.915	NFKBID	0.854	PUM1	0.911	CTBP1-AS	1.012	FAH		MAP3K19	0.502	0.499	0.502	0.621
0.914	RARS	0.854	KIF3A	0.911	FOXCUT	1.012	EIF5A		ERCC3	0	0	0	0
0.914	MIR6844	0.854	KIF3A	0.911	RELN	1.012	CLPTM1		TNFRSF1A	0.499	0.043	0	0.056
0.914	MYO1F	0.854	KIF3A	0.911	RELN	1.012	PPP1R3B		GDNF	0.334	0.448	0.149	0.049
0.913	TUFT1	0.851	EPHB6	0.91	PLEKHM1P	1.012	PCOLCE2		DHX9	0	0	0	0
0.913	TUFT1	0.85	TMEM98	0.908	MALSU1	1.011	ZBED8		CPEB4	0.386	0.668	0	0.774
0.913	TUFT1	0.85	TMEM98	0.907	RFK	1.011	ZBED8		CRYAA	0	0	0	0
0.913	LINC00514	0.85	TMEM98	0.906	MIR4487	1.011	MIR922		MIEN1	0.097	0.033	0.084	0.084
0.913	ICT1	0.85	OXTR	0.905	CTRB2	1.011	ZNF331		COL2A1	0.475	0.222	0	0
0.913	ICT1	0.85	PCAT2	0.905	SLC31A2	1.011	ZNF331		AIFM2	0	0	0.407	0.605
0.913	SYT16	0.85	GBP1P1	0.904	LOC101928105	1.01	PCDHGA1		DBH	0.078	0.036	0.036	0.078
0.912	NMRK1	0.849	SRP14-AS1	0.903	MIR146A	1.01	PCDHGA1		GSDME	0	0	0	0
0.912	NMRK1	0.849	SRP14-AS1	0.903	BCLAF1	1.01	FYTTD1		PPL	0.147	0.035	0.112	0.112
0.912	NMRK1	0.849	SRP14-AS1	0.903	BCLAF1	1.01	PPP1R3B		SDIM1	0	0	0	0
0.91	OSBPL3	0.849	SRP14-AS1	0.903	BCLAF1	1.01	RASSF7		BMP3	0	0	0	0
0.91	CLK2	0.849	ADPRH	0.903	BCLAF1	1.01	RASSF7		BMP4	0	0	0	0.044
0.91	CLK2	0.849	ADPRH	0.902	LOC101927431	1.01	GPR55		HIGD1A	0.039	0	0	0
0.91	CLK2	0.849	ADPRH	0.902	POLR2J	1.009	SNORD18C		HEY2	0	0	0	0
0.91	CD160	0.848	NDUFB8	0.902	MRPL36	1.009	ZNF331		JAG2	0.075	0	0	0
0.91	CD160	0.848	NDUFB8	0.901	MGC15885	1.009	GALR3		HDAC6	0	0	0	0
0.909	RMRP	0.848	NDUFB8	0.901	PFKP	1.008	KIAA0226		TNFRSF10D	0.204	0	0.072	0
0.909	LINC01255	0.848	UACA	0.899	PLA2G12A	1.008	ANXA6		TGFBR2	0.414	0.652	0.748	0.414
0.908	WDR26	0.848	MATN4	0.899	TLX2	1.008	MIR4462		SOD1	0	0	0	0
0.908	WDR26	0.848	SRP14	0.897	CACNA1C-AS4	1.008	DNAJC8		NEFL	0	0	0	0
0.908	PGM1	0.848	SRP14	0.897	DAD1	1.008	MAP3K11		NMT1	0.159	0.159	0.159	0.159
0.908	RBPJL	0.848	SIRPG	0.896	TTC7A	1.008	EFHB		UXT	0	0	0	0
0.908	RBPJL	0.848	SIRPG	0.896	TTC7A	1.008	CLPTM1		PPARGC1A	0.107	0	0	0.107
0.908	RBPJL	0.848	SIRPG	0.896	TTC7A	1.008	MIR7850		FLG	0.172	0.173	0	0.187
0.907	OMA1	0.847	MATN4	0.896	SMG6	1.008	FYTTD1		NOA1	0	0.468	0	0.467
0.907	PGM1	0.847	SUCLG2-AS1	0.895	ECE2	1.007	EGLN2		APEX1	0	0	0	0.076
0.906	C16orf58	0.847	SUCLG2-AS1	0.895	ECE2	1.007	PAPD7		RTN3	0	0	0	0
0.905	TRPC6	0.846	UNQ6494	0.895	ECE2	1.006	CMTM2		SERBP1	0.066	0.616	1.167	0.066
0.905	ZNF619	0.846	SOGA1	0.894	MIR548H5	1.006	CMTM2		MLH1	0.052	0	0	0
0.905	ZNF619	0.844	ABHD5	0.893	MIR5687	1.006	MIR218-1		CLCF1	0	0	0.135	0
0.905	ZNF619	0.844	SUCLG2	0.893	NREP	1.005	SNORD18B		SPRR3	0	0	0	0
0.904	C2CD4B	0.844	SUCLG2	0.893	SALRNA1	1.005	HIST1H4H		UBE4B	0	0.052	0.372	0
0.904	ARHGAP42	0.843	NFU1	0.892	QSOX1	1.004	EIF5A		PCSK9	0.069	0.081	0.657	0.121
0.904	ZNF619	0.843	NFU1	0.892	QSOX1	1.004	EXOC2		MFN2	0.146	0.146	0.169	0.146
0.903	LIPE	0.843	NFU1	0.891	PDZK1	1.004	EXOC2		AZU1	0.238	0.101	0.1	0.238
0.903	LINC01224	0.843	NFU1	0.891	PDZK1	1.004	WDR26		DRAXIN	0	0	0	0
0.903	LINC01224	0.843	NFU1	0.891	PDZK1	1.004	WDR26		PPT1	0	0	0	0
0.902	BBS7	0.843	BCDIN3D	0.89	MED23	1.003	CTPS1		STRADB	0	0	0	0
0.902	BBS7	0.843	NEDD4L	0.89	MED23	1.003	MIR6131		THOC1	0.014	0.014	0	0.605
0.902	NMUR1	0.843	OPRM1	0.89	MED23	1.002	ABI3		ABL1	0.509	0.507	0.048	0.509
0.9	CCDC107	0.843	OPRM1	0.89	MED23	1.002	ABI3		PYCARD	0	0.03	0	0
0.9	CCDC107	0.842	SNORD114-26	0.89	LINC00502	1.002	SNORD16		CHEK2	0	0.187	0	0
0.9	CCDC107	0.841	TMEM208	0.89	TDRD1	1.001	HIST1H4C		GRIK5	0	0	0	0
0.9	CCDC107	0.841	PLA1A	0.889	SLC12A1	1.001	KDF1		ALX3	0	0.031	0	0
0.899	BASP1P1	0.841	PLA1A	0.889	SLC12A1	1	SNORD18A		ANP32B	0	0	0	0
0.899	KIAA1958	0.841	PLA1A	0.889	KCTD3	1	FYTTD1		PPP2CA	0	0	0	0
0.899	KIAA1958	0.841	PLA1A	0.889	GLOD4	0.999	MIR4742		THRA	0	0	0	0
0.899	KIAA1958	0.841	VRK1	0.888	GPR182	0.998	ZNF683		USP17L24	0	0.052	0	0
0.899	CCDC186	0.841	PHLDB2	0.887	ETS1	0.998	ZNF683		CSF1R	0.504	0.968	0.97	0.507
0.898	FAM189B	0.841	PHLDB2	0.887	NREP	0.998	RPL4		LEFTY2	0	0	0	0
0.898	FAM189B	0.841	MIR6830	0.887	NREP	0.998	ZWILCH		CCND2	0	0	0	0
0.898	FAM189B	0.841	NUAK2	0.887	GJB6	0.998	ZWILCH		FCER1G	0	0	0	0
0.898	CEP57	0.84	WHAMMP2	0.887	GJB6	0.998	ZWILCH		RASSF2	0	0	0	0
0.898	CEP57	0.839	ADCK1	0.887	GJB6	0.998	ZWILCH		ARRDC1-AS1	0	0	0	0
0.898	CEP57	0.839	ADCK1	0.886	RNMTL1	0.997	LIFR		CAPN1	0.099	0.089	0.074	0.33
0.898	PSMA5	0.839	MIR5687	0.886	RAD51-AS1	0.997	EGLN2		PAX2	0.014	0	0	0.045
0.898	PSMA5	0.839	RAB3C	0.886	RAD51	0.997	GNGT2		ASIC2	0.359	0.438	0.468	0.751
0.898	PSMA5	0.839	LIPT1	0.886	RAD51	0.996	CIT		DDB1	0	0.073	0.073	0.073
0.898	PSMA5	0.839	LIPT1	0.886	RAD51	0.996	CIT		BIN1	0	0	0	0
0.897	PARVA	0.838	SCARNA27	0.886	RAD51	0.995	EIF5A		GPX4	0.663	0.633	1.121	0.638
0.897	APP	0.838	OTUB2	0.886	LOC101929753	0.995	CAST		TRAF5	0.033	0.168	0.168	0
0.895	HIST1H2AB	0.838	KRT71	0.886	MARK2P9	0.995	RASSF7		CDK11B	0	0.199	0.179	0.179
0.895	LOC101927159	0.838	LRRC29	0.885	UNQ6494	0.995	PNMT		CIAPIN1	0	0	0	0
0.894	SLC46A2	0.837	EPB41L4A	0.885	MIR627	0.993	HFE		MGMT	0	0	0	0
0.894	PROKR1	0.837	GTF2E1	0.884	NBPF12	0.993	HFE		MAL	0.084	0.261	0.261	0.084
0.893	NUPR1L	0.836	NELL2	0.883	KCTD16	0.993	HFE		DPEP1	0.012	0.012	0.012	0.282
0.892	MIR6515	0.836	CTTN	0.883	LOC101927179	0.993	HFE		DNM1L	0.451	0.453	0	0.092
0.891	MEGF8	0.836	CTTN	0.883	LOC101927179	0.993	HFE		SAP18	0.704	0	0.15	0
0.891	MEGF8	0.836	CTTN	0.882	NREP	0.993	HFE		POR	0.261	0	0	0
0.891	PDE4B	0.835	LIPT1	0.882	NREP	0.993	HFE		BCL7C	0.42	0	0	0.181
0.89	RPL15	0.835	LIPT1	0.882	YIPF5	0.993	HFE		EEF2K	0	0	0	0
0.89	LINC01559	0.835	LIPT1	0.882	YIPF5	0.993	HFE		CTLA4	0.097	0.041	0.099	0.082
0.889	APP	0.835	LIPT1	0.882	YIPF5	0.993	HFE		RACK1	0	0	0	0
0.889	APP	0.835	LIPT1	0.882	ZNF572	0.992	SCYL1		EIF5A	0.288	0	0	1.02
0.889	APP	0.835	DYNLRB2	0.881	MIR4759	0.992	SCYL1		CCL19	0	0	0	0
0.889	APP	0.835	DYNLRB2	0.881	ELF1	0.991	EIF3F		RGN	0	0	0	0
0.889	APP	0.835	DYNLRB2	0.88	CSRP1	0.991	TUBB		BARD1	0.282	0.07	0.55	0
0.889	APP	0.835	PRSS1	0.88	CSRP1	0.991	TUBB		PHLDA1	0.031	0.212	0.235	0.031
0.889	APP	0.835	IGLON5	0.879	MIR1343	0.991	TUBB		SFRP4	0.089	0.306	0	0
0.889	APP	0.834	HMHB1	0.879	OXER1	0.991	PNMT		SIX1	0.422	0.461	0.873	0.588
0.888	ITGB3	0.834	LINC00954	0.879	MICAL1	0.991	MDC1		SHH	0	0	0	0
0.888	RPL15	0.834	LINC00525	0.879	MIR1278	0.991	KCNJ5		SHB	0.445	0.416	0.6	0.942
0.888	RPL15	0.834	EHF	0.878	CDH13	0.991	OR7D2		ZFP36	0	0.371	0	0
0.887	NKIRAS1	0.832	PRNCR1	0.878	CDH13	0.989	CPTP		PDCD6IP	0	0.067	0	0.3
0.887	HIST1H3B	0.832	LRRC29	0.878	CDH13	0.989	LMNTD2		IFI27L1	0.077	0.091	0.072	0
0.886	RPL15	0.832	VPS25	0.878	CDH13	0.989	TUBB		IFI27L2	0	0	0.525	0
0.886	RPL15	0.831	LOC103611081	0.878	CDH13	0.989	TUBB		MTRNR2L5	0	0	0	0
0.886	RPL15	0.831	RABL3	0.878	CDH13	0.989	TUBB		PPP1R13L	0	0	0	0
0.886	SNORD123	0.831	PLEKHG4	0.878	CCL16	0.989	TUBB		TP53I3	0	0	0.107	0
0.886	SEMA4A	0.831	PPAP2A	0.877	SPP2	0.988	ZNF696		TGFBR1	0	0	0	0
0.885	CCDC82	0.831	PPAP2A	0.877	LSM8	0.987	EGFR		ACVR1B	0.046	0.113	0.046	0.092
0.884	OLFM2	0.831	PPAP2A	0.877	NREP	0.987	EGFR		BMPR1A	0	0	0	0
0.884	JRKL	0.829	LEMD3	0.877	SIK3	0.987	EGFR		BLID	0.212	0.49	0.135	0.076
0.884	JRKL	0.829	LEMD3	0.877	SIK3	0.987	EGFR		TNS4	0.281	0	0	0.28
0.884	SLC25A37	0.828	TSGA10	0.877	SIK3	0.987	LRRC59		ZMAT3	0	0	0.02	0
0.884	MIR2110	0.828	LOC653602	0.877	BTBD17	0.986	SGSH		IRF7	0.38	0.364	0	0.863
0.883	ATP10A	0.828	EPB41L4A-AS2	0.876	CSRP1	0.986	SLC26A11		NCK1	0	0	0.231	0
0.882	MYO16	0.828	LOC400863	0.875	MOCS1	0.986	SLC26A11		ARHGEF2	0.35	0	0.067	0.137
0.882	PPP1R9B	0.828	TMEM55A	0.875	KRTAP10-10	0.986	SLC26A11		MYOCD	0.457	0	0.319	0
0.882	NBPF12	0.828	DYNLRB2	0.875	DFFA	0.986	SLC26A11		TNFRSF14	0.144	0.333	0.144	0.145
0.882	SEMA4A	0.827	TRIB2	0.875	DFFA	0.986	CPSF3L		BAD	0	0.037	0.037	0.037
0.881	SEMA4A	0.827	TRIB2	0.875	RBPMS2	0.986	CPSF3L		GATA6	0	0	0	0
0.881	SEMA4A	0.827	ANXA6	0.874	SMYD2	0.986	CPSF3L		COPS5	0	0	0	0
0.881	LINC01429	0.826	FGF4	0.874	FAM189B	0.986	CPSF3L		PLEKHG5	0	0	0.469	0.276
0.881	CSNK1A1	0.825	RNF138P1	0.874	FAM189B	0.986	CPSF3L		DHCR24	0.255	0.158	0.157	0.045
0.881	SUSD3	0.825	PTPRR	0.874	FAM189B	0.985	FRMD4A		PHB2	0	0	0.596	0
0.881	SUSD3	0.824	TRPC3	0.874	MICAL1	0.985	ZNF814		FRS2	0	0	0	0
0.881	SUSD3	0.824	RAD23A	0.874	MICAL1	0.984	SMAP2		HMGB2	0	0	0	0
0.881	SUSD3	0.824	RAD23A	0.874	SDK2	0.984	NEU1		UNC5B	0	0	0	0
0.881	SUSD3	0.824	RAD23A	0.873	GBAS	0.984	ATPIF1		EPHA7	0	0	0	0
0.881	RDH12	0.824	RAD23A	0.873	GBAS	0.984	ATPIF1		RPS6KA2	0	0	0	0.285
0.88	CALR	0.823	SNORD114-27	0.873	SIX1	0.984	ATPIF1		ANKRD1	0	0	0	0
0.879	FAIM3	0.823	MIER3	0.872	SNORD91A	0.984	RBM42		ZMYND11	0.094	0.094	0.094	0.094
0.879	RAG1	0.823	MIER3	0.872	USP2	0.983	ZKSCAN4		POU4F3	0	0	0.012	0
0.878	CTRB2	0.823	MIER3	0.871	PLCB4	0.983	MOCS3		DNASE1L3	0	0	0	0
0.878	MIR1278	0.82	ASMT	0.87	LOC101928797	0.983	PROKR1		HIP1	0	0	0	0
0.878	CTB-7E3.1	0.82	LOC100506076	0.869	YAE1D1	0.982	TUFT1		PTK2B	0	0	0.086	0
0.876	MIR146A	0.819	MICALL1	0.869	YAE1D1	0.982	TUFT1		PTK2	0	0	0	0
0.876	H6PD	0.819	LINC00687	0.868	LOC101927954	0.982	TUFT1		DFFA	0.514	0.665	0.875	1.378
0.876	TMEM106A	0.819	PCDHAC1	0.867	GALR3	0.981	NKAPL		BMPR1B	0	0	0	0
0.876	TMEM106A	0.819	PCDHAC1	0.866	SERF2	0.981	LOC100506314		ARHGEF1	0	0	0	0
0.876	TMEM106A	0.819	PLEKHG4	0.866	SEMA6D	0.98	BTD		APBB2	0.488	0.032	0.473	0.614
0.876	TMEM106A	0.819	PLEKHG4	0.865	RNF19B	0.98	DPM1		CREB1	0	0	0	0
0.874	FAIM3	0.818	MROH8	0.865	RNF19B	0.98	HACL1		TLR4	0.011	0.045	0.094	0.088
0.874	FAIM3	0.818	MROH8	0.865	RNF19B	0.98	HACL1		ALDH1A2	1.143	0.215	1.139	0.216
0.874	SLC5A7	0.818	MROH8	0.864	SERF2-C15ORF63	0.98	HACL1		ATOH1	0	0	0.027	0
0.874	SLC5A7	0.818	RPN2	0.864	SERF2	0.98	HACL1		PPP3R1	0	0	0	0
0.874	SLC5A7	0.818	RPN2	0.864	SERF2	0.98	HACL1		SEMA4D	0.61	0.537	0.675	0.475
0.874	SLC5A7	0.818	ALPK3	0.864	SERF2	0.98	EPHB6		CASP10	0	0.018	0.018	0
0.874	C3orf80	0.817	GALNT11	0.864	WIPI1	0.98	BTD		MNT	0.101	0.034	0.126	0
0.873	PCDHGA3	0.817	GALNT11	0.864	PTPRM	0.98	BTD		GHSR	0.22	0.427	0.382	0
0.873	PCDHGA3	0.817	SFTPB	0.864	PTPRM	0.98	BTD		KIFAP3	0	0.022	0.13	0
0.873	LIPE-AS1	0.817	SFTPB	0.864	TNIP1	0.98	ACAP1		BCL2L2	0	0.069	0	0.084
0.872	DSTYK	0.817	MIR659	0.864	TNIP1	0.98	OLFML2A		STK17B	0	0	0.133	0
0.872	DSTYK	0.816	ISLR2	0.864	HCRTR2	0.979	SAMD1		URI1	0.791	0	0	0
0.872	ANGPTL5	0.815	COL27A1	0.864	TLN2	0.979	BTD		P2RX4	0.045	0	0	0.092
0.872	LINC00475	0.815	CES2	0.863	LINC01548	0.978	MIR1244-4		INPP5D	0.06	0.06	0.141	0.142
0.871	ZNF235	0.815	CES2	0.863	NREP	0.978	MIR1244-1		PKP4	0	0	0	0
0.871	GRIK4	0.815	CES2	0.862	NR4A2	0.978	MIR1244-3		FNIP1	0	0	0	0
0.871	FARSA	0.814	ZNF663P	0.862	PFKP	0.978	MIR1244-2		GPR65	0.125	0	0.641	0.046
0.87	S100A13	0.814	SLC30A8	0.861	WHAMMP2	0.978	RNASEH2C		LGMN	0	0.048	0.323	0
0.87	MIR7850	0.814	SLC30A8	0.861	CLK2	0.977	TCAP		GPER1	0	0	0	0.189
0.869	CHTOP	0.814	FAM96B	0.861	CLK2	0.976	EPHB6		SORT1	0.473	0.147	0.718	0.474
0.869	CHTOP	0.814	FAM96B	0.861	CLK2	0.976	EPHB6		RNPS1	0	0	0	0.085
0.869	CHTOP	0.814	FAM96B	0.861	SERF2	0.975	MIR7107		ID3	0	0	0	0.265
0.869	LOC100506444	0.814	ISLR2	0.86	PAFAH1B2	0.975	UNC5CL		F3	0.343	0.145	0.975	0.169
0.869	LOC101927132	0.814	BBS7	0.86	PAFAH1B2	0.975	DDX60		TMBIM1	0	0.17	0	0.505
0.868	LINC00854	0.814	BBS7	0.86	PAFAH1B2	0.975	WNT3		ZDHHC16	0	0	0	0
0.868	CKAP4	0.813	NDFIP2	0.86	PAFAH1B2	0.975	RHBDL2		MUL1	0	0	0.36	0
0.867	ELMO2	0.813	NDFIP2	0.86	PAFAH1B2	0.974	MAFK		PSMG2	0.615	0.203	0.424	0.506
0.867	ELMO2	0.813	EZH1	0.86	PAFAH1B2	0.974	CARD14		MST1R	0	0.168	0.167	0
0.867	PDE4B	0.813	PCIF1	0.86	PAFAH1B2	0.972	NOP16		IL2	0.118	0.118	0.118	0.118
0.867	PDE4B	0.813	PLCB1	0.86	PPHLN1	0.972	NOP16		DIABLO	0.175	0.176	0.175	0.312
0.867	CD44	0.813	PLCB1	0.86	PPHLN1	0.972	NOP16		ZNF622	0.032	0.555	0.518	0
0.867	CD44	0.812	RNU6-79P	0.86	PPHLN1	0.972	NOP16		KCNMA1	0	0.075	0.285	0.1
0.867	CD44	0.812	WHAMMP1	0.86	PPHLN1	0.972	NOP16		ARHGEF5	0	0.266	0.033	0.033
0.867	CD44	0.811	EEF1E1	0.86	PPHLN1	0.972	NOP16		EI24	0	0.118	0.088	0
0.867	CD44	0.811	EEF1E1	0.86	PPHLN1	0.972	NOP16		PIGT	0.017	0.017	0.017	0
0.867	CD44	0.811	EEF1E1-BLOC1S5	0.86	PPHLN1	0.972	HIGD2A		RNF34	0.059	0.019	0.019	0.467
0.867	CD44	0.81	CELA2A	0.86	PPHLN1	0.972	ERI3		MYDGF	0.121	0.014	0.121	0.283
0.867	CD44	0.81	NDFIP2-AS1	0.86	ZCRB1	0.972	ERI3		FBXW7	0.122	0.122	0.122	0.241
0.866	KCTD16	0.809	NSMCE1	0.859	RECK	0.972	ERI3		RFK	1.128	1.03	0.907	0.884
0.866	LINC01548	0.809	LOC101929452	0.859	MIR7111	0.972	ERI3		LHX4	0.26	0	0.13	0.26
0.866	GALR3	0.809	FAM84A	0.859	NREP	0.972	ERI3		FATE1	0.193	0.115	0	0.115
0.866	SPP2	0.808	ZC3H10	0.859	ETV5	0.972	TRIP11		TSLP	0	0.319	0	0.037
0.865	YIPF5	0.808	MAPK8IP3	0.858	CSNK1A1	0.971	KLK13		TPT1	0.114	0.114	0	0.114
0.865	YIPF5	0.808	MAPK8IP3	0.857	SNORD111	0.97	TMEM156		CRIP1	0	0	0	0
0.865	YIPF5	0.808	SNORD114-28	0.857	LOC729218	0.97	TMEM156		DSC2	0.012	0.071	0	0
0.865	CHRNA5	0.807	ADM	0.856	LOC101927139	0.97	C6orf118		KRT5	1.077	0.586	0.547	0.667
0.865	CBL	0.807	CES3	0.856	NTPCR	0.97	AMT		KRT13	0	0	0	0.132
0.865	PDK2	0.806	HNRNPF	0.855	PRSS1	0.97	AMT		KRT10	0.285	0.312	0.312	0.312
0.865	SUN3	0.806	PROZ	0.855	HEG1	0.97	AMT		RARG	0	0	0	0.082
0.865	SUN3	0.806	PROZ	0.855	MAN2C1	0.97	AMT		DSG1	0	0	0	0
0.865	SUN3	0.806	FLJ21408	0.855	MAN2C1	0.97	AMT		PTEN	0	0.232	0.052	0.181
0.863	CSNK1A1	0.805	ISLR2	0.855	MAN2C1	0.97	LINC01359		TOPORS	0.313	0.174	0	0.097
0.863	CSNK1A1	0.805	OPRM1	0.855	MAN2C1	0.968	NICN1		CIT	0.048	0.181	0.153	0.996
0.863	CSNK1A1	0.805	OPRM1	0.855	PRSS23	0.967	STPG1		TM7SF3	0	0	0.214	0
0.862	USP30	0.805	C2orf16	0.854	VAT1L	0.967	STPG1		HSPB6	0.045	0.045	0	0.045
0.862	KIAA1377	0.805	LINC01450	0.853	LOC100506281	0.967	STPG1		SOCS3	0.56	0.337	0.337	0.895
0.862	EIF3F	0.804	HSPH1	0.853	UGT1A5	0.966	LOC339593		SOCS2	0	0.165	0.097	0
0.861	HMGCS1	0.804	HSPH1	0.852	NDUFB1	0.965	LOC100132356		MCL1	1.101	0.392	0.392	1.504
0.861	HMGCS1	0.804	HSPA4	0.852	C1QTNF5	0.965	METRNL		WDR92	0.088	0.088	0.088	0.088
0.86	LINC00471	0.803	GFPT1	0.852	MFRP	0.965	LINC00691		SCG2	0.369	0.369	0.292	0.292
0.86	LOC100507144	0.803	GFPT1	0.851	MIR1272	0.965	GGTA1P		CCL5	0	0.015	0.029	0
0.86	CYP4A11	0.803	MIR5197	0.851	SLC30A8	0.965	GGTA1P		CCL2	0.02	0.02	0	0.047
0.86	BTBD3	0.802	FYN	0.851	SLC30A8	0.964	TMEM88B		DMPK	0.035	0	0	0.584
0.86	BTBD3	0.802	GDA	0.851	MIR1282	0.964	LOC101929705		PA2G4	0.458	0.457	0.458	0.458
0.86	BTBD3	0.802	GDA	0.85	MIR1273A	0.963	LOC100506639		SPG7	0.466	0.464	0.464	0.466
0.859	LOC100128714	0.802	GDA	0.85	FAM188B	0.963	PRICKLE2-AS3		NANOS3	0	0	0	0.033
0.858	LINC01132	0.802	CH25H	0.849	CPSF2	0.962	SNORA16B		GATA3	0.207	0	0	0.555
0.858	MYL4	0.802	LOC102467080	0.849	MIR1243	0.959	NDST1		DNAJC5	0	0	0	0
0.857	ETV5	0.801	ISLR2	0.849	PVT1	0.959	DPEP2		PIK3R1	0	0.024	0	0
0.857	TNNI1	0.801	RBPJL	0.848	TMEM98	0.958	CHRM1		FGF20	0.159	0	0	0
0.857	HCN3	0.801	RBPJL	0.848	TMEM98	0.958	PPT2		MRPS30	0	0	0	0.278
0.857	HCN3	0.801	RBPJL	0.848	TMEM98	0.958	PCNXL3		IVL	0	0.233	0	0
0.856	LINC01255	0.8	IKZF2	0.848	MIR7851	0.958	EPPIN-WFDC6		TNFRSF12A	0.262	0.089	0.089	0.303
0.856	IL7R	0.8	LOC283731	0.848	SNORD91B	0.958	EPPIN		HIPK3	0	0.015	0.019	0
0.856	IL7R	0.8	TYRP1	0.848	HNF4G	0.958	EPPIN		TPX2	0	0	0	0.081
0.856	SLC25A39	0.8	IQCJ-SCHIP1	0.848	NDUFS6	0.957	GPR180		PLAGL1	0.193	0.211	0.765	0.323
0.856	SLC25A39	0.8	IQCJ-SCHIP1	0.847	GJB6	0.956	APOL3		TXNIP	0	0	0	0.204
0.856	LINC00298	0.8	IQCJ	0.846	APOH	0.956	APOL3		GHITM	0	0	0	0
0.855	CALN1	0.8	IQCJ	0.845	LOC101928600	0.956	GM2A		IAPP	0.261	0	0	0
0.855	EIF2A	0.8	IQCJ	0.845	PXDN	0.956	GM2A		CDK5RAP3	0.224	0.224	0.224	0.224
0.855	MIR5092	0.799	TXNDC16	0.845	GOLGA5	0.955	EFCAB11		ATN1	0.017	0	0.113	0
0.854	SERP1	0.799	TXNDC16	0.845	PHLDB2	0.955	EFCAB11		CEBPB	0.15	0.473	0.167	0.15
0.853	KRT84	0.799	HCFC2	0.844	NF2	0.955	BST1		TP63	0.229	0.229	0	0.228
0.853	MAPK8IP3	0.798	GSN	0.844	NF2	0.955	TULP1		PAWR	0	0.123	0.123	0.123
0.853	MAPK8IP3	0.798	GPR137C	0.844	NF2	0.955	TULP1		IRF1	0.385	0.386	0.387	0.386
0.852	ZNF99	0.797	ZC3H10	0.844	NF2	0.955	SEC61A1		MCF2	0	0	0	0
0.851	FAM188B	0.797	ZC3H10	0.844	NF2	0.954	ARHGAP29		PCID2	0.732	0.369	0.3	0.369
0.85	PDK2	0.797	LINC01429	0.844	NF2	0.954	ZKSCAN8		MEF2C	0	0	0	0
0.85	PDK2	0.797	ARHGAP26-AS1	0.844	NF2	0.954	ZKSCAN8		SLC39A10	0.192	0.019	0.019	0.051
0.85	MYO18A	0.796	KRTAP10-11	0.844	NF2	0.954	ZKSCAN8		JTB	0.428	0	0	0.428
0.85	MYO18A	0.796	IFT172	0.844	NF2	0.953	BHLHB9		SGK1	0.277	0.26	0.34	0.261
0.85	SCAMP3	0.796	SIRPG-AS1	0.843	LOC200726	0.953	BHLHB9		FZD9	0.346	0	0	0.296
0.85	SCAMP3	0.796	SNORA16B	0.843	MATN4	0.953	BHLHB9		KITLG	0.088	0.131	0.028	0.178
0.848	MYL4	0.795	SLC5A4	0.841	SON	0.953	BHLHB9		TNFAIP3	0.075	0	0.011	0
0.847	TMEM119	0.795	MIR548AM	0.841	SON	0.953	BHLHB9		ANO6	0.331	0.215	0.381	0.215
0.847	SCMH1	0.795	HNRNPF	0.841	SON	0.953	BHLHB9		NEURL1	0.014	0.102	0	0
0.846	SIT1	0.795	MIR4423	0.841	SON	0.953	SFTA2		CNR1	0	0	0.177	0
0.845	RGS1	0.795	LOC101927630	0.841	SON	0.953	SHQ1		WFS1	0	0	0.564	0.688
0.845	ARNTL2-AS1	0.794	GRIK4	0.84	COG4	0.953	CD200R1		RSL1D1	0	0.398	0.431	0.188
0.845	MRI1	0.794	GRIK4	0.84	COG4	0.953	CD200R1		KRT38	0	0	0	0
0.845	MRI1	0.794	SNORD114-29	0.84	TNFRSF8	0.953	CD200R1		KRT36	0	0	0	0.07
0.845	HSD17B3	0.794	CCNI2	0.84	TNFRSF8	0.953	CD200R1		KRT34	0.073	0.073	0.073	0.101
0.844	MIR1265	0.794	CCNI2	0.839	GTF2E1	0.953	LMO4		KRT33A	0.258	0.259	0.259	0.356
0.844	RUNDC3A	0.794	CCNI2	0.839	SCARNA27	0.953	CIRBP		KNG1	0	0.606	0	0.3
0.844	RUNDC3A	0.793	MIR3118-1	0.839	FLNB	0.953	CIRBP		PIK3CG	0.281	0.281	0	0.281
0.844	RUNDC3A	0.792	HSPH1	0.839	FLNB	0.953	EIF3D		CST3	0	0.234	0	0.51
0.844	OPRM1	0.792	HSPH1	0.839	FLNB	0.952	CIRBP		TIMP1	0	0	0	0
0.844	OPRM1	0.791	OR2T27	0.839	FLNB	0.952	CIRBP		AGT	0.941	0.363	1.381	0
0.842	LOC100294362	0.79	AP5M1	0.838	SF3B3	0.952	CIRBP		G2E3	0.112	0.285	0.152	0
0.842	ENDOV	0.79	AP5M1	0.838	GART	0.952	MYPN		USP17L5	0	0.052	0	0
0.842	ENDOV	0.79	EXOC5	0.838	GART	0.952	MYPN		NR4A3	0	0	0	0
0.842	ENDOV	0.79	DNAH10	0.838	MIR3945	0.952	PUM1		LAMP1	0.521	0.392	0.631	0.393
0.841	MLXIP	0.789	MIR4262	0.838	CASC19	0.952	PUM1		AKT2	0.03	0.319	0.03	0.03
0.841	S100A1	0.789	PLEKHM1P	0.838	TAGLN	0.951	CNIH4		AKT1	0	0	0	0
0.841	DDX26B-AS1	0.789	MIR455	0.838	TAGLN	0.951	CNIH4		BCL2L11	0.013	0.013	0.013	0
0.841	S100A13	0.788	IKZF2	0.838	ADAMTS5	0.951	CNIH4		BCL2L10	0.405	0.012	0	0
0.84	DDX26B	0.787	PDZK1	0.837	SLC4A7	0.951	CNIH4		BCL2L1	0	0	0	0.043
0.84	S100A13	0.787	PDZK1	0.837	SLC4A7	0.951	CNIH4		BCL2	0.56	0	0.561	0
0.84	S100A13	0.787	PDZK1	0.837	HYPK	0.951	CNIH4		RALB	0.044	0.043	0	0.245
0.84	S100A13	0.786	GCKR	0.837	HYPK	0.951	RAI14		BAX	0	0	0	0.343
0.84	LOC100506083	0.786	PHACTR3	0.837	SLC30A8	0.951	RAI14		APBB1	0.494	0.494	0	0.684
0.84	RUNDC3A-AS1	0.785	CREBL2	0.836	SERINC4	0.95	TEAD3		TNFRSF10A	0.423	0	0.458	0
0.84	HMP19	0.784	LCE1B	0.836	SERINC4	0.949	LOC104968399		CDK11A	0	0.198	0.178	0.179
0.839	F10-AS1	0.783	FNDC4	0.836	RAI14	0.949	LOC104968399		CBX4	0	0	0	0
0.839	GTF2E1	0.782	MIR8084	0.836	RBP7	0.949	IL12RB2		KRT6C	0.778	0.297	0.581	0.608
0.839	RAD23A	0.782	CYP17A1	0.836	MATN4	0.949	IL12RB2		PINK1	0	0	0.342	0
0.839	RAD23A	0.781	LOC100128076	0.835	CA10	0.949	IL12RB2		RRAGA	0	0.033	0	0
0.839	RAD23A	0.78	FIGNL2	0.835	MATN4	0.949	IL12RB2		PPARG	0.281	0	0.376	0.266
0.839	RAD23A	0.78	LOC102723439	0.835	CSRP1	0.949	IL12RB2		NFE2L2	0	0.041	0	0.344
0.839	RPF1	0.779	LOC283194	0.835	ANKRD54	0.949	IL12RB2		ZC3H12A	0.369	0.286	0.287	0.422
0.839	GALNT14	0.779	FERMT2	0.835	ANKRD54	0.949	ZKSCAN8		EPB41L3	0.294	0	0	0
0.839	SCMH1	0.779	FERMT2	0.834	CSNK1A1	0.947	RTP3		CARD8	0.387	0	0	0.563
0.839	SCMH1	0.779	FERMT2	0.834	CSNK1A1	0.947	LOC648987		TP53INP1	0	0	0	0
0.839	SCMH1	0.778	ZNF235	0.834	CSNK1A1	0.947	KRT222		GJA1	0.264	0.176	0.264	0.132
0.839	SCMH1	0.778	EIF3L	0.834	RAI14	0.947	EFCAB11		GADD45G	0.287	0.473	0.588	0.213
0.838	OR13C4	0.778	EIF3L	0.834	RAI14	0.947	EFCAB11		STAT3	0.069	0.418	1.13	1.587
0.838	ACVR1C	0.777	ZNF233	0.834	MIR658	0.947	EFCAB11		SPDEF	0	0	0.02	0.159
0.838	USP2	0.777	ZNF233	0.833	SLC25A16	0.946	MYL12A		FAM162A	0.087	0	0	0
0.838	DDX19A	0.776	MIR1231	0.833	RABL3	0.946	MYL12A		POU3F3	0.437	0.429	0.612	0.382
0.837	TRIM9	0.776	RBPJ	0.833	LINC00598	0.946	EIF2AK2		NCKAP1	0.227	0	0	0
0.837	TRIM9	0.776	RBPJ	0.833	LINC00598	0.946	ANKRD54		LILRB1	0	0	0.07	0.516
0.836	PRSS1	0.775	LOC100996255	0.833	LINC00598	0.946	ANKRD54		CYFIP2	0	0	0	0
0.836	BHLHE41	0.774	FES	0.832	MIR1247	0.946	FOXC2-AS1		EPHB6	0.553	0.977	1.254	0.98
0.836	ANKRD54	0.774	FES	0.832	SMR3B	0.946	DAD1		EPHB4	0.043	0.026	0	0.552
0.836	ANKRD54	0.774	PLGLA	0.832	SPCS2	0.945	HCG25		EPHB3	0	0	0	0.251
0.835	HMHB1	0.774	RDH11	0.831	XRRA1	0.945	MTCL1		EPHB2	0.927	0.058	0	0.296
0.835	MIR658	0.774	RDH11	0.831	XRRA1	0.945	FOXC2		EPHB1	0.102	0.019	0.019	0.196
0.834	CAPN9	0.774	C3orf52	0.831	XRRA1	0.945	RBMS3		EPHA8	0	0.018	0	0
0.834	LINC00243	0.774	C3orf52	0.83	PCSK1	0.945	RBMS3		DUX4	0	0	0	0
0.833	CAPN9	0.772	ASCC2	0.829	ARMC1	0.945	RBMS3		EPHA5	0.455	0.569	0	0.415
0.833	LINC00525	0.772	ASCC2	0.829	ARMC1	0.945	RBMS3		EPHA4	0	0	0	0
0.833	RABL3	0.772	DNAJB3	0.829	LOC100128076	0.945	RBMS3		EPHA3	0	0	0	0
0.833	LINC00954	0.772	IGSF5	0.828	HNRNPF	0.945	MIR7855		EPHA2	0	0	0	0
0.832	SLAMF9	0.771	SNORD114-30	0.827	GSG1	0.945	MIR658		EPHA1	0	0	0	0
0.832	SLAMF9	0.77	NHS	0.827	GSG1	0.944	MYL12A		GHRL	0	0	0.295	0.667
0.832	SLAMF9	0.77	NHS	0.827	GSG1	0.944	ASIC5		ENDOG	0.211	0.198	0.238	0.199
0.832	PDK2	0.769	FBXL5	0.827	GSG1	0.943	SCD		ANGPT4	0.121	0.121	0	0.121
0.832	NAV2	0.769	FBXL5	0.826	PHLDB2	0.943	C19orf53		PRELID1	0	0.071	0	0.067
0.832	MGA	0.769	FBXL5	0.826	PHLDB2	0.942	LOC101929596		LHX3	0	0	0	0
0.832	MGA	0.769	FBXL5	0.824	PTN	0.942	SHB		CTSZ	0.024	0.024	0	0
0.83	ZFPL1	0.769	CUL2	0.824	VPS39	0.942	KLHL5		ERO1A	0	0	0	0
0.83	H6PD	0.768	F10-AS1	0.824	VPS39	0.942	KLHL5		TNFRSF25	0	0	0.363	0.427
0.829	DUSP6	0.767	CUL2	0.824	CDH26	0.941	C4orf36		CUL5	0.278	0.129	0.129	0.13
0.829	DUSP6	0.765	AKAP17A	0.824	TAGLN3	0.941	TMEM206		CDC42	0.637	0	0	0
0.828	GADD45B	0.765	AKAP17A	0.824	TM9SF3	0.941	TMEM206		MAGEH1	0	0	0	0
0.828	ZNF225	0.765	TAF1L	0.823	GART	0.94	CCL28		CLU	0	0	0	0.414
0.827	C5orf63	0.765	FES	0.823	GART	0.94	CCL28		FBXO10	0	0.11	0	0
0.827	C5orf63	0.765	FES	0.823	IKZF2	0.94	CCL28		INS-IGF2	0.591	0.573	0.019	0.593
0.827	CDCA5	0.765	ANXA13	0.822	ENPP3	0.94	MYL12B		DUSP1	0.013	0.08	0.014	0.038
0.827	FXYD4	0.765	ANXA13	0.822	RNY4	0.939	DNAAF3		TSC22D3	0	0	0	0.722
0.827	FXYD4	0.764	GPR180	0.822	MIR129-1	0.939	DNAAF3		PPP2R1B	0.546	0.025	0.577	0.056
0.827	LOC100379224	0.764	PLA1A	0.822	PCSK1	0.939	DNAAF3		PPP2R1A	0	0.186	0.288	0.279
0.826	ANKS6	0.763	RC3H2	0.821	LTV1	0.939	DNAAF3		PDIA3	0	0.138	0.181	0.048
0.826	NELL2	0.763	RC3H2	0.821	TRPV2	0.939	MEAF6		RASSF7	0.041	0.041	0	1.01
0.824	HIST1H1C	0.763	KIF4B	0.819	FMO6P	0.939	MEAF6		ITPKB	0	0	0	0.054
0.823	CAP2	0.763	RIN1	0.819	MRPL44	0.939	MEAF6		BAG5	0	0	0	0
0.822	CTSF	0.763	PMEPA1	0.819	TAGLN3	0.939	MEAF6		PRSS8	0	0.458	0.023	0
0.822	NELL2	0.762	LINC00411	0.819	TAGLN3	0.939	MEAF6		KLK13	0	0.497	0	0.971
0.822	NELL2	0.762	ALKBH3-AS1	0.819	SCAMP3	0.939	MEAF6		IKZF3	0	0	0	0
0.821	SAMD14	0.761	SEC24C	0.819	SCAMP3	0.938	MIR210		FOXP1	0.041	0.11	0.73	0.21
0.821	SAMD14	0.761	SEC24C	0.818	TRPC3	0.938	PGPEP1		VHL	0	0	0	0
0.821	VPS11	0.761	HPYR1	0.818	ZBTB6	0.937	PGPEP1		ATP2A1	0	0	0	0.041
0.821	VPS11	0.761	MATN2	0.818	MIR5197	0.937	SEH1L		AURKA	0	0	0	0
0.821	MIR1249	0.761	MATN2	0.817	OR4F16	0.937	SEH1L		IFI27	0.013	0.028	0.247	0
0.82	ANKRD33	0.76	RASSF6	0.817	OR4F3	0.937	PPT2		ITCH	0	0	0.032	0
0.82	ANKRD33	0.76	RASSF6	0.817	OR4F29	0.937	PPT2		HIPK2	0.601	0	0	0
0.82	ANKRD33	0.76	CACUL1	0.816	HNRNPF	0.937	PPT2-EGFL8		IKBKB	0.58	0	0.041	0.5
0.82	ANKRD33	0.76	RASSF6	0.816	DIO3	0.937	MIR210HG		TNFSF10	0	0.278	0.126	0
0.818	INHBC	0.76	RASSF6	0.816	ITGB1	0.936	GBA		WNT9A	0	0	0.015	0
0.818	GREM2	0.76	PAMR1	0.816	PEX14	0.936	GBA		KLF11	0	0	0.139	0
0.816	CRTAM	0.76	PXDN	0.816	ABHD10	0.936	GBA		NUDT2	0	0.031	0	0.03
0.815	CDK7	0.759	CHN1	0.816	ABHD10	0.936	ANAPC11		HSPA1B	0	0	0	0.425
0.815	NELL2	0.759	CHN1	0.816	ABHD10	0.936	ANAPC11		DNM2	0.236	0.236	0.236	0.266
0.813	HIST1H2BB	0.758	FAM171B	0.816	ABHD10	0.936	ANAPC11		NLRP2B	0	0	0	0
0.812	SORBS2	0.758	SNORD114-31	0.815	CD200R1	0.935	PHRF1		CGB3	0	0	0	0
0.812	SORBS2	0.757	FAM181A	0.815	CD200R1	0.935	PHRF1		CGB7	0.023	0.023	0.023	0.278
0.812	MIR613	0.757	CHN1	0.815	CD200R1	0.935	PHRF1		DOCK8	0	0	0	0
0.812	TNN	0.757	FAM181A	0.815	CD200R1	0.935	PHRF1		DAXX	0	0	0	0.752
0.812	HIST1H3C	0.757	FAM181A	0.814	SNORD111B	0.935	TSPO2		BIRC7	0	0	0	0
0.811	SDR42E1	0.756	CNBD2	0.813	ZNF663P	0.934	CELSR2		RARA	0.342	0.343	0.343	2.183
0.811	FJX1	0.756	CNBD2	0.813	COMMD2	0.934	SCMH1		AR	0	0	0	0
0.81	ZNF383	0.756	CNBD2	0.813	ELMO1	0.933	TAGLN2		MYBL2	0	0	0	0
0.81	ENTPD4	0.756	CNBD2	0.813	ELMO1	0.933	FKBP1A-SDCBP2		CASC2	0.108	0.108	0.107	0.384
0.81	ENTPD4	0.755	FYTTD1	0.813	BBS7	0.933	FKBP1A		TRAF6	0.329	0.096	0.069	0.375
0.809	ZC3H10	0.755	CREBBP	0.813	BBS7	0.933	FKBP1A		GGCT	0	0	0.021	0.081
0.808	TMPRSS6	0.755	CREBBP	0.812	NDFIP2	0.933	FKBP1A		BLOC1S2	0.032	0.143	0.143	0.216
0.807	DDX23	0.755	KIAA0226	0.812	NDFIP2	0.933	TSPO2		DCPS	0.399	0.399	0.42	0.061
0.807	SNHG18	0.755	MIR125B1	0.811	EEF1E1	0.933	ANAPC11		IRS2	1.157	0.724	0.649	0.892
0.807	INMT-FAM188B	0.755	FYTTD1	0.811	EEF1E1	0.933	ANAPC11		RAPGEF2	0	0	0	0
0.807	INMT	0.754	IMPA1	0.811	EEF1E1-BLOC1S5	0.933	ANAPC11		CFDP1	0.017	0.017	0	0.548
0.807	INMT	0.754	IMPA1	0.811	ARHGEF37	0.933	ANAPC11		STK17A	0.065	0	0.238	0.065
0.806	SCAF11	0.754	IMPA1	0.811	IKZF2	0.933	ANAPC11		CLDN7	0.222	0	0	0.341
0.806	LRRC37A2	0.754	FYTTD1	0.81	LINC00113	0.933	ANAPC11		ACVR1C	0.838	0.52	0.366	0.839
0.805	SEMA5A	0.754	FAM91A1	0.809	NSMCE1	0.933	ANAPC11		TRPV1	0	0	0	0
0.805	PTBP1	0.753	COX6C	0.809	ZC3H10	0.933	ANAPC11		SGK3	0.485	0.071	0.362	0
0.805	PTBP1	0.752	SMYD2	0.809	NDFIP2-AS1	0.933	ANAPC11		GADD45B	0.828	0.733	0.732	0.732
0.805	PTBP1	0.751	SPTB	0.808	DDX23	0.933	ANAPC11		BAG4	0	0.111	0.111	0.241
0.804	HSPA4	0.751	SPTB	0.808	OSMR-AS1	0.932	LOC143666		TNFRSF6B	0	0.422	0	0.714
0.804	LINC01450	0.751	MAP4K4	0.807	INMT-FAM188B	0.932	ZNF192P1		TNFSF9	0	0.024	0	0.125
0.804	DPCR1	0.751	MAP4K4	0.807	INMT	0.932	RBMS3-AS3		S100A14	0.924	0.251	0.25	0.757
0.804	OPRM1	0.751	MAP4K4	0.807	INMT	0.932	ETV7		ZNF304	0	0	0	0.059
0.804	OPRM1	0.75	LOC100505625	0.807	OSMR	0.931	ALYREF		WNT5A	0	0	0	0
0.803	MIR1273A	0.75	LINC00399	0.806	SLC38A6	0.931	ETV7		MNDA	0	0	0	0
0.802	GLI1	0.749	TMEM246	0.806	HSPH1	0.931	ETV7		ETV6	0.608	0.086	0.648	0.464
0.802	GLI1	0.749	FAM181A-AS1	0.806	HSPH1	0.931	ETV7		BRMS1	0.615	1.063	0.013	0.181
0.802	GLI1	0.749	C2orf91	0.806	ASAH2B	0.931	ETV7		PTPRH	0	0	0	0.17
0.802	OR10P1	0.749	LCE1C	0.806	FLJ21408	0.931	ETV7		TP53	0.597	0	0	0
0.801	SVOP	0.749	LCE1C	0.805	MYLK	0.931	ETV7		C1D	0.095	0.095	0.095	0.095
0.801	GSN	0.748	MID1	0.805	MYLK	0.931	ETV7		SRA1	0.386	0.388	0	0
0.801	MIR3686	0.748	MID1	0.805	MYLK	0.931	LOC104968399		GRIN1	0	0	0	0
0.801	RGS3	0.748	MID1	0.805	MYLK	0.931	ATP6V0A2		SDF2L1	0	0	0.127	0.351
0.8	LOC100128993	0.748	MID1	0.805	RTTN	0.93	COA7		TP53AIP1	0.089	0.353	0.063	0.437
0.8	SORBS2	0.747	PGM2	0.804	SNORA45B	0.93	SLC25A18		TMEM173	0.151	0.151	0.151	0.163
0.8	NDST1	0.747	KLHL2	0.804	C4orf29	0.93	SLC25A18		TRIM39	0	0	0	0
0.8	CCER2	0.747	KLHL2	0.804	ZNF148	0.929	FAM20A		GPAM	0.588	0.675	0.656	0.917
0.799	IL12A-AS1	0.747	RPL41	0.804	ADRBK1	0.929	LOC644172		TRIM69	0	0	0	0
0.799	TXNDC16	0.747	RPL41	0.803	DAB2	0.928	SPATA7		CHD8	0	0	0	0
0.799	TXNDC16	0.747	SMS	0.803	DAB2	0.928	SPATA7		AGO4	0.081	0.026	0	0.081
0.799	LOC100506281	0.747	SMS	0.802	SNX2	0.928	GNAI2		ROBO2	0	0.344	0	0
0.798	SORBS2	0.746	OTOGL	0.802	SNX2	0.928	LARP4		DDIT4	0.287	0.42	1.102	0.44
0.798	ZC3H10	0.745	MIR8075	0.802	OSMR	0.928	LARP4		FFAR4	0.358	0.338	1.017	0.712
0.798	ZC3H10	0.745	CRTAM	0.802	SLC38A6	0.928	LARP4		STK11	0.57	0.509	0.199	0.348
0.798	NEDD4L	0.745	TLDC2	0.802	SLC38A6	0.928	LARP4		ANGPT1	0	0.073	0.187	0.073
0.798	GPR137C	0.745	TLDC2	0.802	CA10	0.928	LARP4		PRLR	0.562	0.713	0.387	0.387
0.798	VCAM1	0.745	MIR23B	0.801	TRMT5	0.928	LARP4		AEN	0.05	0.057	0.057	0.057
0.798	VCAM1	0.745	STC1	0.801	SHC4	0.928	LARP4		RAD9A	0	0	0.291	0
0.798	VCAM1	0.745	MIPOL1	0.8	ROPN1	0.927	SCN1B		MZB1	0.035	0.227	0.035	0.089
0.797	LPP-AS1	0.745	MIPOL1	0.8	CREB3L2	0.927	SCN1B		CASP5	0	0.622	0.592	0
0.797	TMCC2	0.745	MIPOL1	0.8	CREB3L2	0.926	ABTB2		GDF9	0	0	0	0
0.795	TIMP4	0.744	IL19	0.799	HCN3	0.925	MIR6869		GDF7	0.046	0.122	0	0
0.795	SCMH1	0.744	MIR4497	0.799	HCN3	0.925	KRTCAP3		GDF6	0.022	0.022	0.039	0
0.794	PPP1R1B	0.744	RUNX1	0.799	HP1BP3	0.925	KRTCAP3		GDF10	0	0	0.733	0.604
0.794	PPP1R1B	0.744	TMEM14B	0.799	OPN3	0.925	BRAP		BMX	0	0.588	0	0
0.793	BCDIN3D	0.744	TMEM14B	0.798	ARFGAP2	0.924	LOC100507547		BIRC3	0.528	0.527	0.085	0.161
0.792	KCND3	0.744	TMEM14B	0.798	ARFGAP2	0.924	LOC100507547		BIRC2	1.339	0.561	0.026	0.461
0.792	KCND3	0.744	TMEM14B	0.798	ZC3H10	0.924	LOC100507547		RPS6KA1	0.022	0.022	0.2	0.471
0.792	MIR3147	0.744	TMEM14B	0.798	ZC3H10	0.924	LOC100507547		DEDD2	0	0.013	0.013	0.515
0.791	URI1	0.744	TMEM14B	0.796	COTL1	0.924	CIRBP-AS1		UNC5D	0	0	0	0
0.791	LOC643355	0.743	C2orf48	0.796	C8orf48	0.924	ACAD10		TMIGD1	0	0	0.012	0.049
0.79	ENSA	0.743	TFAP2A-AS1	0.796	LOC102724710	0.924	ACAD10		STIL	0.014	0	0	0
0.79	ENSA	0.743	TRPV4	0.796	LINC01378	0.923	NEURL4		HTR2B	0	0.23	0.23	0.229
0.79	ENSA	0.743	TEFM	0.795	MIR4481	0.923	NEURL4		GFRAL	0	0	0	0
0.79	ENSA	0.743	PROSER2	0.795	CA10	0.922	ANAPC11		WNT11	0	0.016	0.159	0
0.79	ENSA	0.743	TFAP2A	0.795	HSPH1	0.922	MAST4		ADAMTSL4	0.927	0.365	0.116	1.045
0.789	DNAH10	0.743	RBPJ	0.795	HSPH1	0.922	MAST4		SIGMAR1	0	0	0	0
0.788	MYH16	0.743	RBPJ	0.793	PPAP2A	0.922	MAST4		NME2	0.095	0.013	0.013	0.094
0.787	DENND2D	0.743	CELSR2	0.793	PPAP2A	0.922	MYL12B		PPM1F	0	0	0	0
0.787	TFIP11	0.742	C16orf45	0.793	PPAP2A	0.922	LOC101929698		HTT	0	0	0	0
0.787	TFIP11	0.742	TMEM246	0.793	SCFD1	0.921	LDLR		NSG1	0	0	0.126	0.067
0.786	ENC1	0.742	TMEM246	0.792	SCFD1	0.921	LDLR		AARS	0.085	0.024	0	0
0.786	ENC1	0.742	SYBU	0.792	SCFD1	0.921	LDLR		USP27X	0	0	0	0
0.786	ENC1	0.742	SYBU	0.792	SCFD1	0.921	LDLR		IL10	0.172	0.196	0.172	0.483
0.786	ENC1	0.742	SPP2	0.792	SCFD1	0.921	LDLR		IGF2	0.435	0.404	0.05	0.434
0.786	ENC1	0.742	TFAP2A	0.792	SCFD1	0.921	LOC101927762		IGF1R	0.04	0.04	0.04	0.04
0.786	LOC100506790	0.741	MIR27B	0.792	CCND3	0.921	APOC2		IGF1	0.222	0.222	0	0
0.785	APOE	0.741	ANXA6	0.792	CCND3	0.92	IL20		KRT86	0	0	0	0
0.785	APOE	0.74	LPPR1	0.792	CCND3	0.919	KLK14		DYRK3	0.187	0.013	0.322	0.32
0.785	APOE	0.74	KCNJ8	0.79	DSG2-AS1	0.918	MYL12B		TRAF3IP2	1.028	0.097	0	0.029
0.784	ENSA	0.739	MAP4K4	0.789	SORCS3	0.917	MSRB3		KRT3	0.016	0.016	0.016	0.336
0.784	ENSA	0.739	MAP4K4	0.789	RNF138P1	0.917	MSRB3		TRIAP1	0	0	0	0
0.784	ENSA	0.739	CTD-2270F17.1	0.788	MYH16	0.917	MSRB3		ACTN4	0	0.102	0.056	0.056
0.784	LNX1-AS2	0.739	ATPAF2	0.788	RBPJL	0.917	MYL12A		LIPK	0	0	0.045	0.045
0.783	ZFP14	0.739	GID4	0.788	RBPJL	0.917	STPG1		LIPN	0	0	0	0
0.783	ZFP14	0.739	CDKL2	0.788	RBPJL	0.917	GPAM		PRAMEF7	0	0.233	0	0
0.782	LOC101928565	0.738	BASP1	0.788	SLC46A2	0.917	GPAM		PRAMEF6	0	0	0	0
0.782	METTL7B	0.738	LOC285696	0.787	LOC730101	0.915	APOBEC2		CDKN2A	0	0	0.016	0
0.782	FALEC	0.738	SASS6	0.787	LOC730101	0.915	GOLGA6A		ACAA2	0.534	0.533	0	0
0.782	MIR3920	0.738	SASS6	0.787	AFF3	0.913	PKD1L1		CTTN	0.237	0.836	0.597	0.257
0.782	CRACR2B	0.737	BCAR1	0.786	KDM2A	0.913	VWA1		CFLAR	0	0	0.035	0
0.782	CRACR2B	0.737	SOGA1	0.785	SPIN1	0.913	VWA1		E2F2	0	0	0	0.442
0.78	CGN	0.737	TRMT13	0.785	C1QTNF7	0.913	LOC100507431		PAK2	0.042	0	0	0.042
0.78	LAD1	0.736	NEDD4L	0.784	APP	0.912	RIMS1		TIE1	0.065	0.065	0.133	0.081
0.779	HSD17B2	0.736	NEDD4L	0.784	MIR7641-2	0.912	BSPH1		P4HB	0.392	0	0.226	0.545
0.779	APOE	0.736	NEDD4L	0.784	APP	0.912	PSMB6		HNF1B	0.404	0.404	0	0
0.778	KRT6C	0.736	NEDD4L	0.784	APP	0.912	PSMB6		TIMP3	0	0	0	0
0.778	CTXN2	0.736	LOC102724957	0.784	APP	0.911	FOXL1		ACTN2	0.495	0.065	0	0
0.778	RPL14	0.736	CES3	0.784	APP	0.91	SLC31A1		AKR1B1	0	0	0.111	0
0.778	BPIFB4	0.736	CES3	0.784	APP	0.91	GPBAR1		VDAC2	0	0	0	0
0.777	MIR3142	0.736	LOC100505795	0.784	APP	0.91	GPBAR1		FHL2	0.131	0.132	0	0.132
0.777	SRL	0.736	ZCCHC10	0.784	APP	0.91	GPBAR1		WRN	0	0	0	0.628
0.777	MIR190A	0.736	ZCCHC10	0.784	APP	0.91	NFX1		TFDP2	0	0.034	0.195	0
0.777	FAM83C	0.736	ZCCHC10	0.783	SAMD9L	0.91	NFX1		TFDP1	0.024	0.214	0.024	0
0.777	ORC2	0.736	ZCCHC10	0.783	SAMD9L	0.91	NFX1		DOCK1	0	0	0	0
0.777	ORC2	0.736	ZCCHC10	0.783	SAMD9L	0.91	SNORA38B		IKBKE	0.173	0.172	0.172	0.426
0.777	MIDN	0.736	ZCCHC10	0.783	SAMD9L	0.909	LOC102724312		SCRIB	0.053	0.093	0	0.053
0.776	ABHD12	0.736	ZCCHC10	0.783	SAMD9L	0.909	LOC102724312		ARHGEF7	0	0	0	0
0.776	ABHD12	0.736	ZCCHC10	0.783	FBXL21	0.909	LOC102724312		KIAA0141	0	0	0	0
0.776	RPL14	0.735	WDFY1	0.783	UGT1A6	0.909	DEAF1		TGFB1	0	0	0	0.269
0.776	EWSAT1	0.735	TFAP2A	0.783	MFSD8	0.909	DEAF1		CDC73	0.503	0	0.491	0.838
0.776	FOXD4L4	0.735	LOC101929653	0.782	CHCHD4	0.909	LOC100128573		PIP	0	0.324	0	0.601
0.775	LRRC37A4P	0.735	BASP1	0.782	CHCHD4	0.909	MATN4		LTF	0.081	0.716	1.206	1.432
0.774	MIR4730	0.735	CTB-178M22.2	0.781	MIR6745	0.908	RHOT2		PF4	0	0	0	0
0.773	SYT2	0.735	HMGCS1	0.781	TMEM43	0.908	MIER3		CD40LG	0	0	0	0
0.773	TMEM247	0.735	HMGCS1	0.78	LPIN2	0.908	MIER3		APOH	0	0.49	0.846	0
0.773	ASIC5	0.734	CPEB3	0.78	LECT2	0.908	MIER3		HTATIP2	0	0	0	0
0.772	TBPL1	0.734	CDR2L	0.779	FAH	0.908	EXOG		PAEP	0	0	0	0
0.771	ERRFI1	0.734	PAMR1	0.779	FXYD4	0.908	EXOG		PDCD10	0	0	0	0
0.77	LOC102724201	0.734	PAMR1	0.779	FXYD4	0.906	NXF1		HMGB1	0.102	0	0.05	0
0.77	LOC102724201	0.734	PAMR1	0.777	LAMA4	0.906	NXF1		PLA2G6	0	0	0	0
0.77	LOC102724201	0.734	KCNMB1	0.777	LAMA4	0.905	TDP1		SRC	0.056	0.03	0.017	0.447
0.77	RAB3C	0.734	SCARNA18	0.777	LAMA4	0.905	TDP1		SLC9A1	0.118	0.119	0.061	0.119
0.77	CP	0.734	ITGB1	0.777	LAMA4	0.905	KRT40		BMP7	0	0	0	0
0.77	CP	0.733	MIR24-1	0.777	LAMA4	0.905	TMEM80		BEX2	0	0	0	0
0.77	APOE	0.733	GADD45B	0.777	FLJ40194	0.905	TMEM80		BAG6	0	0	0	0.056
0.769	WDR62	0.732	MIR3074	0.776	ELMO1	0.905	TMEM80		ANGPTL4	0	0.075	0.179	0.349
0.769	WDR62	0.732	SMOX	0.775	LMCD1-AS1	0.905	TMEM80		CADM1	0.017	0	0.034	0
0.768	LINC01314	0.732	SMOX	0.774	SRRD	0.905	KRTAP3-3		SLC46A2	0.894	0.502	0.788	0.457
0.767	TNIP1	0.732	SMOX	0.774	TMCC2	0.905	MSRB3		CARD11	0	0	0	0
0.767	TNIP1	0.732	SMOX	0.774	HPS4	0.904	FKBP15		CARD14	0	0	0	1.177
0.767	NAA20	0.732	SMOX	0.774	HPS4	0.904	MIDN		BCL2L13	0.077	0.312	0.294	0.039
0.767	NAA20	0.731	OR10A6	0.773	TEFM	0.904	YBX2		NAA15	0.153	0	0	0
0.766	MIR1243	0.731	ITGB1	0.773	LMCD1	0.902	LINC01227		LCE1A	0	0.468	0	0
0.766	THAP8	0.731	LIME1	0.773	LMCD1	0.902	NMUR1		HDAC4	0.167	0.2	0.076	0.209
0.766	LIMD1	0.731	GLRX3	0.773	LMCD1	0.902	HDAC1		PI3	0.276	0.382	0.26	0.34
0.766	BBC3	0.731	GLRX3	0.773	LMCD1	0.901	MATN4		PPID	0.388	0	0	0
0.766	BBC3	0.73	BCAR1	0.773	SYNC	0.901	HMP19		SGPP1	0	0	0	0
0.766	BBC3	0.73	BCAR1	0.773	SYNC	0.901	LINC01525		CARD6	0.476	0	0	0.495
0.765	SMG8	0.73	MIR7156	0.772	UGT1A6	0.901	SCMH1		HINT2	0.049	0.019	0.019	0.578
0.765	LOC101926889	0.729	FAM181A	0.771	LOC101927630	0.9	MATN4		CDK19	0	0	0.016	0
0.765	SNX27	0.729	FAM181A	0.77	CYTH3	0.9	TMEM174		CARD10	0.695	0	0	0
0.765	LINC00708	0.729	STOML3	0.77	POLD2	0.899	PSMA5		CD3G	0	0	0	0.086
0.764	VENTXP7	0.729	STOML3	0.77	POLD2	0.899	PSMA5		FAIM2	0.171	0.146	0.161	0.064
0.764	PLTP	0.728	SNORD91B	0.77	HYMAI	0.899	PSMA5		SYCP2	0	0	0.164	0.296
0.764	MIR7641-2	0.728	LINC01314	0.77	C16orf45	0.899	PSMA5		BRAT1	0.027	0.027	0.042	0.075
0.763	LOC401585	0.728	LINC00944	0.77	ERBB2IP	0.899	SNORA52		KRT24	0.662	0.401	0.401	0.779
0.763	C12orf74	0.725	ZSWIM8	0.77	ERBB2IP	0.898	SDK2		HMOX1	0.048	0.035	0.034	0
0.763	C12orf74	0.725	ZSWIM8	0.77	ERBB2IP	0.897	LAMB3		TRAIP	0	0.025	0.025	0
0.763	DGKD	0.725	ZSWIM8	0.77	ERBB2IP	0.897	TAGLN2		CTSV	0.273	0	0	0.274
0.763	PAN3-AS1	0.725	DPEP2	0.77	ERBB2IP	0.896	MISP		COL4A3	0.072	0.044	0	0.276
0.762	NDFIP1	0.725	MXRA5	0.77	ERBB2IP	0.895	TMEM14A		NFKB1	0	0	0	0.029
0.761	H2AFB2	0.724	IRS2	0.769	POLD2	0.895	SOCS3		FIGNL1	0.301	0	0	0
0.76	FAM171A2	0.724	DYNLL2	0.769	LINC01265	0.895	ACVR1		RASSF6	0.362	0.76	0.688	0.361
0.76	LINC00324	0.724	MIR567	0.768	SORCS3-AS1	0.895	PCAT2		RAMP2	0.521	1.07	0.72	0.105
0.759	ANKRD29	0.724	CNTD1	0.767	TEK	0.895	CD44		ANXA4	0	0	0	0.277
0.759	KAT6B	0.723	WNK4	0.767	TEK	0.895	CD44		PRAMEF11	0	0	0	0
0.759	KAT6B	0.723	LOC339593	0.767	TEK	0.895	CD44		PRAMEF2	0	0	0	0
0.759	KAT6B	0.723	COA3	0.767	PSMA8	0.895	CD44		PRAMEF4	0	0	0	0
0.759	H2AFB3	0.722	TP73	0.767	PSMA8	0.895	CD44		POU4F1	0	0.084	0	0
0.759	H2AFB1	0.722	LOC101929570	0.767	PSMA8	0.895	CD44		CSNK2A2	0	0	0	0
0.759	STC2	0.722	CMTM1	0.767	PCGF1	0.895	CD44		TMEM109	0	0	0	0
0.758	BBC3	0.722	CMTM1	0.767	PACSIN3	0.895	CD44		SATB1	0	0	0	0
0.758	WNT9B	0.722	MAP9	0.767	PACSIN3	0.894	ACVR1		DSC1	0	0.461	0	0
0.757	PIEZO2	0.722	CTSL	0.767	DST	0.893	NIPAL3		BHLHB9	0.387	0	0	0.953
0.756	KLC2	0.722	CTSL	0.766	SNORA45A	0.892	IRS2		NUGGC	0	0	0	0
0.755	PLTP	0.722	CTSL	0.765	PACSIN3	0.892	LAMB3		ARHGEF18	0.38	0.969	0.524	1.194
0.755	PLTP	0.722	CTSL	0.765	PLAGL1	0.892	LOC101928674		TRAF4	0	0	0	0
0.755	PLTP	0.722	CTSL	0.765	PLAGL1	0.892	LOC101928674		CHAC1	0	0	0	0
0.755	MRPS12	0.721	LOC101926889	0.765	PLAGL1	0.892	LINC01227		SHQ1	0.485	0.954	0.953	0.953
0.755	MRPS12	0.721	CMTM1	0.765	PLAGL1	0.892	SLA2		BIRC5	0	0.482	0.731	0
0.754	SARS2	0.721	CMTM1	0.765	PLAGL1	0.892	SLA2		FZD5	0	0	0	0
0.754	SARS2	0.721	CMTM1	0.765	PLAGL1	0.892	TDRD1		ROCK1	0	0	0	0
0.753	MIR3190	0.721	CMTM1	0.765	PTCH1	0.892	MIR4435-2		FOXE3	0	0	0	0
0.753	MIR3191	0.721	CMTM1	0.765	PTCH1	0.892	CCDC150		SOD2	0	0	0.021	0.049
0.753	MRPS12	0.721	CMTM1	0.765	PLAGL1	0.892	MIR4435-1		HDAC3	0	0	0	0
0.753	PLEKHA6	0.719	SFRP1	0.765	PLAGL1	0.892	TTC33		ADAM15	0.653	0.079	0	1.181
0.752	RGS3	0.719	FXYD4	0.765	PLAGL1	0.89	FBXL2		NR3C1	0.077	0	0.019	0.037
0.752	RGS3	0.719	FXYD4	0.765	PLAGL1	0.89	FBXL2		TP73	0.231	0.722	0.218	0.291
0.752	HIST1H4B	0.718	DBF4B	0.765	PLAGL1	0.89	VWA5B1		CSF2	0	0	0	0
0.752	ZNF697	0.718	DBF4B	0.765	PLAGL1	0.889	LOC100507144		ILK	0	0	0	0
0.752	NAA20	0.718	DBF4B	0.764	SALL4	0.889	MIR21		BFAR	0	0	0	0
0.751	SARNP	0.718	LOC101927666	0.764	GLIS3	0.889	PPAPDC3		SIVA1	0	0	0	0
0.751	SARNP	0.718	HERC4	0.764	MITF	0.888	KIF3A		CD274	0.057	0.139	0.057	0.057
0.751	SARNP	0.718	HERC4	0.764	MKRN2	0.888	KIF3A		STK39	0.45	0.015	0	0
0.751	LOC101929089	0.718	HERC4	0.764	MKRN2	0.888	KIF3A		AIPL1	0	0	0	0
0.75	MIR6876	0.718	HERC4	0.763	DQX1	0.888	DCST1		ARHGEF12	0.072	0.029	0.029	0
0.75	TMEM25	0.718	HERC4	0.763	SSMEM1	0.888	DCST1		NOP53	0	0	0	0
0.75	TMEM25	0.717	ZNF487	0.763	NDNF	0.888	LOC101928674		PPARD	0.103	0.024	0.024	0.104
0.75	TMEM25	0.717	CPE	0.762	SLC23A3	0.887	DCST2		NDUFS1	0	0	0	0
0.75	TMEM25	0.717	MIR3611	0.762	SLC23A3	0.887	WHAMMP1		MTCH1	0.189	0.073	0.406	1.33
0.75	TMEM25	0.717	FGF8	0.762	SLC23A3	0.887	LAMC2		EIF2AK3	0	0	0	0
0.75	TMEM25	0.717	FGF8	0.762	SNRNP27	0.887	LAMC2		KMT2A	0	0	0.013	0
0.75	LOC645434	0.717	FGF8	0.762	SNRNP27	0.886	ZSCAN16		CAV1	1.077	0.47	0.668	0.1
0.75	C2CD2L	0.717	FGF8	0.762	NT5DC3	0.886	LOC101928973		PLAC8	0	0	0	0
0.75	C2CD2L	0.717	BCAR1	0.761	KAT6B	0.886	ZNF235		WWOX	0	0	0	0.157
0.749	CCDC34	0.717	SIRPB2	0.761	KAT6B	0.886	GBA		ALOX15B	0	0	0	0
0.749	CCDC34	0.717	SIRPB2	0.761	KAT6B	0.886	GBA		ANXA1	0.14	0	0	0.14
0.749	KLC2	0.716	LOC401177	0.761	CD160	0.884	TAF6L		PROC	0	0	0	0
0.748	SCMH1	0.716	LTF	0.761	CD160	0.884	SIKE1		EDNRB	0	0	0	0
0.748	AGO3	0.716	MRAP	0.761	NCOA5	0.884	SIKE1		RRN3	0	0	0	0
0.748	AGO3	0.716	MRAP	0.76	H6PD	0.884	SIKE1		CAT	0.017	0.158	0	0
0.748	LOC100507006	0.716	MRAP	0.76	PTCH1	0.884	SIKE1		RGL2	0	0	0	0.777
0.748	RPL41	0.715	ENTHD2	0.759	CBLN2	0.884	RFK		UBD	0.025	0.025	0	0
0.748	RPL41	0.714	C17orf89	0.759	TRPC6	0.883	LEKR1		RMDN3	0	0.134	0.134	0.046
0.748	C1QTNF5	0.713	LIFR	0.758	C2orf91	0.883	ETV2		YME1L1	0	0	0	0
0.747	LOC388942	0.713	CREM	0.757	AUP1	0.883	ETV2		FAM129B	0.024	0	0.035	0
0.747	ZNF732	0.713	CREM	0.757	AUP1	0.883	ETV2		MAP3K20	0	0	0	0
0.747	DDR1	0.713	CREM	0.757	AUP1	0.883	PXT1		BCLAF1	0.594	0.594	0.903	0
0.747	KLC2	0.713	CREM	0.757	HTRA2	0.882	PRNCR1		KRT6B	0.555	0.537	0.244	0.245
0.747	KLC2	0.713	PRLR	0.757	HTRA2	0.882	UPK3A		PRF1	0	0	0.571	1.213
0.746	IL1F10	0.713	PRLR	0.757	COA6	0.882	UPK3A		PRKCH	0.164	0.164	0.164	0.164
0.746	SIX2	0.713	PRLR	0.757	COA6	0.882	LEKR1		HGF	0.011	0	0	0
0.746	DIDO1	0.713	PRLR	0.757	LOC101927765	0.88	MIR7854		UBE2K	0.462	0	0	0.462
0.746	DIDO1	0.713	PRLR	0.757	LOC728084	0.879	KCTD20		UBE2D3	0	0	0	0
0.746	DIDO1	0.713	PRLR	0.757	GALNT11	0.879	KCTD20		CXCR4	0	0	0	0
0.746	PPP1R1B	0.713	HSD17B3	0.757	GALNT11	0.879	KCTD20		SPHK1	0	0	0	0
0.745	ORMDL2	0.713	SNORD113-2	0.756	COA6	0.879	KCTD20		DSG2	0.038	0.038	0.065	0
0.744	LINC00309	0.712	MARCH4	0.756	LOC101927765	0.879	KCTD20		CDK5	0	0	0	0
0.744	ZNF793-AS1	0.712	LIFR-AS1	0.756	MIR6131	0.879	CDKL4		RIPK3	0.175	0	0	0
0.743	HEXB	0.712	LIFR-AS1	0.755	PLEKHG4	0.878	LINC00092		HIP1R	0	0	0	0
0.743	TMEM14B	0.712	MIR554	0.755	SLITRK1	0.878	PPFIBP2		BMP8A	0.047	0.047	0.107	0.047
0.743	TMEM14B	0.712	GLB1L	0.755	SLITRK1	0.878	APOC1P1		MSX2	0.508	0.436	0	0
0.743	TMEM14B	0.711	GRIK1	0.755	NEDD4L	0.878	APOC1P1		SPRR2D	0	0.019	0	0
0.743	TMEM14B	0.711	GRIK1	0.755	TMEM209	0.878	APOC1P1		BRAF	0.561	0.56	1.118	0.771
0.743	TMEM14B	0.711	SPIC	0.755	TMEM209	0.878	CTRB2		ADORA2A	0	0	0.015	0
0.743	TMEM14B	0.71	RPH3A	0.755	GDF3	0.878	KRTAP3-2		KRT9	0	0	0	0.195
0.742	AP5S1	0.71	RPH3A	0.754	LARS2-AS1	0.878	PCBD2		LIPM	0	0	0	0
0.742	AP5S1	0.71	FAM83C	0.754	GALNT14	0.877	HENMT1		KANK2	0	0	0	0.384
0.742	AP5S1	0.71	PTPRN	0.754	CREBBP	0.877	INHBE		BID	0	0.011	0.011	0
0.742	PAN3	0.71	PTPRN	0.754	CREBBP	0.877	MIR3675		ABL2	0.072	0	0.279	0.248
0.742	PALM2-AKAP2	0.71	LCE1E	0.754	GKN2	0.876	BTBD17		MPZ	0	0	0	0
0.742	PALM2-AKAP2	0.71	RUSC2	0.752	COA7	0.876	CCDC43		OPA1	0	0	0	0
0.742	PALM2	0.71	RUSC2	0.752	PLA2G2C	0.876	CCDC43		F2R	0	0	0	0
0.742	MIER3	0.71	LINC00842	0.751	PTCH1	0.876	ATXN10		ACKR3	0.245	0.611	0.245	0.343
0.742	MIER3	0.71	GOLT1A	0.75	LINC00676	0.876	ATXN10		NME2P1	0	0	0	0
0.742	MIER3	0.709	NAA20	0.749	PLEKHG4	0.876	HIST1H4J		CASP9	0.126	0.158	0.152	0.23
0.742	TMPRSS6	0.709	NAA20	0.749	WDR60	0.876	TMEM135		CASP8	0	0.402	0.456	0.401
0.742	TBPL1	0.708	LOC100507431	0.749	MYEF2	0.876	TMEM135		CASP7	0	0	0	0
0.742	MIR4421	0.707	LINC01187	0.749	MYEF2	0.876	TMEM135		CASP6	0.184	0.185	0.326	0
0.742	LNX1	0.707	KRT82	0.749	MYEF2	0.875	HENMT1		CASP4	0.069	0.113	0.113	0
0.742	LINC00499	0.707	PDE4D	0.748	SMG6	0.874	ARHGAP26-AS1		CASP3	0	0	0	0
0.742	CTRC	0.707	PDE4D	0.748	CYTH1	0.874	TPM4		CASP2	0	0	0	0
0.741	CCND1	0.706	SMC2-AS1	0.748	TGFBR2	0.874	MYO18A		CASP14	0.091	0	0.255	0.073
0.741	ZNF793	0.704	ADAMTS16	0.748	TGFBR2	0.874	MYO18A		UCP2	0	0	0	0
0.741	LOC101929089	0.704	MIR4524B	0.748	RPL41	0.874	PCDHGA3		PTGS2	0	0	0	0
0.741	LOC101929089	0.704	RXFP3	0.748	RPL41	0.874	PCDHGA3		IL12A	0.542	0.206	0.437	0.277
0.741	LOC101929089	0.704	PTPRN	0.747	LINC00343	0.874	LARP4B		ADRA1A	0.047	0.047	0.023	0.047
0.741	LOC101929089	0.704	GAPT	0.747	LINC00343	0.873	DSTYK		CASP1	0.011	0.416	0.367	0
0.741	TMPRSS6	0.704	GAPT	0.747	DLGAP4	0.873	DSTYK		SPRR2A	0	0.036	0	0
0.741	ENTPD6	0.704	GAPT	0.746	SRR	0.873	SCMH1		SPRR2B	0	0.064	0	0
0.741	ENTPD6	0.704	GAPT	0.746	SRR	0.873	APOC4-APOC2		SPRR1A	0	0	0	0
0.74	MIR6500	0.704	C4orf22	0.746	MIR4683	0.873	APOC4		ADM	1.265	0.807	0.514	0.626
0.74	PDZK1P2	0.704	C4orf22	0.746	PTCH1	0.872	DHH		CD24	0	0	0	0
0.74	HN1L	0.704	MIR3650	0.746	OTOGL	0.872	C6orf132		APC	0.099	0.116	0.116	0.099
0.739	SASS6	0.703	LTF	0.745	MIPOL1	0.872	HIST1H1T		CXCR2	0	0	0	0
0.739	SASS6	0.703	EPC2	0.745	MIPOL1	0.872	LOC101927159		STK26	0	0	0	0
0.739	ABTB2	0.703	LINC01399	0.745	MIPOL1	0.872	KRT71		STK3	0	0.129	0.247	0
0.739	MIR6811	0.703	NAA20	0.745	BASP1	0.872	MIR5096		STK25	0	0	0	0
0.738	TRMT13	0.703	HNRNPA1P33	0.745	MIR1305	0.871	CELA2B		STK24	0	0.596	0.593	0.593
0.737	TOMM40	0.702	MIR4524A	0.744	LOC285696	0.871	ANK1		NF2	0.02	0	0.844	0
0.737	TOMM40	0.702	RAI14	0.744	LOC100505625	0.868	LOC101927132		NRK	0	0	0	0
0.737	TOMM40	0.702	RAI14	0.744	GHDC	0.868	TAGLN2		SCX	0	0	0	0
0.737	NFATC2	0.701	RAI14	0.744	GHDC	0.867	LOC101927239		KRT74	0.918	0.366	0.543	0.405
0.737	NFATC2	0.7	ASMT	0.744	TBC1D23	0.867	RASSF5		NLRP9	0.12	0	0	0
0.737	NFATC2	0.7	ASMT	0.744	TBC1D23	0.867	RASSF5		SETX	0	0	0	0
0.737	NFATC2	0.7	NEO1	0.744	RTP3	0.867	NUAK2		CDKN1B	2.059	1.373	1.375	1.611
0.737	ABHD5	0.7	NEO1	0.743	GNA12	0.866	TRIB1		NOTCH1	0	0	0	0
0.737	LOC102724957	0.7	NEO1	0.743	TMEM14B	0.865	MIR4293		NUPR1	0.019	0.019	0	0
0.736	ZCCHC10	0.699	MIR100HG	0.743	TMEM14B	0.864	LINC01548		C1QBP	0.013	0	0	0
0.736	ZCCHC10	0.698	TMEM145	0.743	TMEM14B	0.864	PNKD		TNFRSF9	0.58	0.65	0.561	0.141
0.736	ZCCHC10	0.698	SMCO2	0.743	TMEM14B	0.864	PNKD		VDAC1	0	0	0	0
0.736	ZCCHC10	0.697	CYP2A6	0.743	TMEM14B	0.863	AAMP		PTH	0.094	0.094	0	0.094
0.736	ZCCHC10	0.697	ATXN3L	0.743	TMEM14B	0.863	AAMP		MAPK1	0	0	0	0
0.736	ZCCHC10	0.697	PUM2	0.742	NEXN	0.863	IRF7		GABRB3	0.448	0	0	0
0.736	ZCCHC10	0.697	PUM2	0.742	NEXN	0.863	IRF7		C5AR1	0.052	0	0	0.079
0.736	ZCCHC10	0.697	TMEM171	0.741	BASP1	0.862	PHOSPHO1		TAOK1	0	0	0	0
0.735	ERVV-2	0.697	TMEM171	0.741	STK11IP	0.862	PHOSPHO1		VDR	0	0	0	0
0.734	CTB-178M22.2	0.696	CTD-2297D10.2	0.741	DENND2D	0.862	TRIB1		SFN	0.027	0.027	0.064	0.18
0.734	LRRFIP2	0.696	AGBL1-AS1	0.741	FZD8	0.862	MIR3680-2		YWHAB	0	0	0	0
0.734	CUL4A	0.696	STOM	0.741	KIAA1467	0.862	MIR3680-1		LRRK2	0	0	0	0
0.734	LOC100128076	0.696	STOM	0.74	LIMS2	0.86	LINC00471		BARHL1	0	0	0	0
0.734	CREBBP	0.696	STOM	0.739	LOC101930010	0.86	SULT2B1		HSPA9	0.055	0	0.364	0.028
0.734	CREBBP	0.696	STOM	0.739	INPP1	0.86	HIF1AN		G6PD	0.072	0	0	0
0.733	GARNL3	0.696	STOM	0.739	INPP1	0.86	GBAP1		EGR1	0.324	0.014	0	0.159
0.733	LRPPRC	0.695	SNORD91A	0.738	CCDC186	0.86	MIR1249		TICAM1	0.155	0.313	0.312	0.444
0.732	MAVS	0.695	KLHL8	0.738	MKRN2OS	0.86	C20orf197		AVP	0	0.574	0	0
0.732	MAVS	0.695	RORA	0.738	MIR6070	0.86	C20orf197		MSX1	0	0	0	0
0.732	MAVS	0.695	RORA	0.737	TMEM235	0.86	C20orf197		GNRH1	0.281	0.462	0.463	0.281
0.732	CUL4A	0.694	C10orf11	0.737	TMEM235	0.86	C20orf197		NGF	0.012	0.013	0	0
0.732	PCID2	0.694	CD320	0.737	TMEM235	0.86	LINC00676		KRAS	0.015	0.015	0.015	0
0.732	PCID2	0.694	CD320	0.737	PHYHD1	0.86	IRF7		HRAS	0.015	0.015	0	0.672
0.732	PCID2	0.694	RDX	0.737	PHYHD1	0.859	PHLDB2		MYC	0.147	0.148	0.147	0.148
0.732	PCID2	0.694	RDX	0.737	DST	0.858	PIGC		SPINK9	0.085	0.085	0	0.085
0.732	KCTD2	0.694	RDX	0.736	MIR3681	0.858	PIGC		NDNF	0.326	0.076	0.763	0.076
0.732	CUL4A	0.694	RDX	0.736	NEDD9	0.857	CCDC33		OSR1	0.276	0.681	0.016	0
0.732	LOC100996351	0.694	RDX	0.736	NEDD9	0.857	SMAP2		GZMK	0.53	0.408	0.408	0.528
0.732	PCID2	0.694	RDX	0.736	NEDD9	0.857	LAMB3		TOP2A	0	0	0	0
0.731	TMCC2	0.693	NT5C3B	0.736	RC3H2	0.857	SOGA1		TOP1	0	0	0	0
0.731	ADPRHL1	0.693	KLHL2	0.736	RC3H2	0.857	MOCS1		GZMA	0.171	0.039	0.097	0.171
0.731	C11orf63	0.692	NT5C3B	0.736	MIR8082	0.856	CASC18		FGFR1	0.02	0	0	0
0.731	C11orf63	0.692	NT5C3B	0.735	PLEKHA6	0.856	CASC18		ARF4	0.046	0.046	0	0.252
0.73	CUL4A	0.691	CMIP	0.735	SH2D4A	0.855	PITPNM2		ERCC2	0	0	0	0
0.73	TMCC2	0.691	PAPD7	0.735	SH2D4A	0.854	PITPNM2		ALOX12	0	0	0	0
0.729	SNORD91B	0.691	PAPD7	0.735	SH2D4A	0.854	SLC25A39		PIM1	1.071	0.464	1.069	1.564
0.729	SCO1	0.691	SYCE2	0.734	TRPS1	0.854	SLC25A39		PTPN1	0	0	0	0
0.729	C20orf197	0.69	FER1L6-AS2	0.734	TRPS1	0.854	RAPGEF1		DNAJA1	0	0	0	0
0.729	C20orf197	0.69	SDHAP3	0.733	GDF10	0.854	TMEM61		BRCA1	0.484	0.038	0.461	0
0.729	C20orf197	0.689	SCN11A	0.732	GADD45B	0.854	LMBR1L		GABRA5	0	0	0	0
0.729	C20orf197	0.689	ZDHHC22	0.732	FAM98B	0.854	LMBR1L		YAP1	0.284	0.197	0.197	0.197
0.729	MIR7156	0.689	TAGLN3	0.732	TM4SF4	0.854	LMBR1L		STK10	0.361	0.303	0.014	0.288
0.729	MIR659	0.689	TAGLN3	0.732	TRIB2	0.853	GP5		GREM1	0.623	0.018	0.45	0.607
0.728	ADPRM	0.688	LINC01488	0.732	TRIB2	0.851	EPHB6		SLIT2	0.077	0.077	0.131	0.056
0.728	STOML3	0.688	LINC01488	0.731	LINC00243	0.851	MIR199A1		UFL1	0	0	0	0
0.728	STOML3	0.688	LINC01488	0.731	BIRC5	0.851	SPP2		NF1	0	0	0	0
0.728	FANCE	0.688	LINC01488	0.731	BIRC5	0.85	RPLP2		RHOT1	0	0	0	0
0.727	HSPB9	0.688	ENTPD6	0.731	BIRC5	0.849	RBPJL		FLNA	0	0	0	0
0.727	SNORD114-19	0.688	ENTPD6	0.73	FOXP1	0.849	RBPJL		ALK	0.134	0.312	0	0.134
0.726	MRAP	0.688	TAGLN3	0.729	OR10A6	0.849	RBPJL		RTL10	0	0	0	0
0.726	MRAP	0.687	MSRB3	0.729	KLHL36	0.849	FAM188B		GCLM	0.085	0	0.085	0.21
0.726	MRAP	0.687	MSRB3	0.729	KLHL36	0.848	TMEM98		GCLC	0.022	0.022	0.022	0
0.726	ZNF224	0.687	MSRB3	0.729	HMX2	0.848	TMEM98		DDIAS	0	0	0	0
0.725	CMIP	0.687	RAB5C	0.728	VCAM1	0.848	TMEM98		ATF4	0	0	0	0
0.725	PIP5K1A	0.687	RAB5C	0.728	VCAM1	0.848	HIST1H2BL		ATCAY	0.018	0.018	0.018	0
0.725	PIP5K1A	0.687	RAB5C	0.728	VCAM1	0.848	DNAH10		HSPA5	0	0.564	0.013	0.232
0.725	PIP5K1A	0.687	MAN2A2	0.728	JMY	0.846	CEBPD		YWHAZ	0.059	0.033	0	0
0.725	PIP5K1A	0.687	GLB1L	0.728	MIR659	0.846	S100A13		DKK1	0	0	0	0
0.723	HTATSF1P2	0.687	GLB1L	0.728	KIAA1211	0.846	HIST1H2AI		DYNLL1	0	0	0	0.029
0.723	PDZK1	0.687	STK16	0.728	CCDC70	0.846	GLI1		PRKCI	0	0.058	0.18	0.21
0.723	PDZK1	0.687	STK16	0.727	GPR142	0.846	GLI1		PTN	0.102	0	0.824	0
0.723	PDZK1	0.686	MARCH3	0.727	C9orf135-AS1	0.846	GLI1		PPP3CC	0	0.134	0.231	0.134
0.722	TSHZ2	0.686	KLHL8	0.727	ARHGAP11A	0.845	CAPN11		NLRP1	0.701	0.193	0.193	0.206
0.722	TEAD1	0.686	KLHL8	0.727	ARHGAP11A	0.844	CDH1		SOX9	0.065	0	0.221	0.065
0.721	PDGFRA	0.686	KLHL8	0.727	ARHGAP11A	0.844	HMGB3P1		SOX2	0	0	0	0
0.721	CAPN14	0.686	KLHL8	0.726	FIGNL2	0.844	CHTOP		EVPL	0	0	0	0
0.72	AKNAD1	0.685	SMC2	0.726	SBF2	0.844	CHTOP		P2RX7	0.372	0	0	0.372
0.72	CBLN2	0.685	SMC2	0.726	CLDN23	0.844	CHTOP		CD5	0	0	0	0
0.72	F8A1	0.685	SMC2	0.726	MIR2110	0.844	RUNDC3A		TIA1	0.086	0.086	0	0.17
0.719	F8A2	0.685	ABCA8	0.726	PLEKHG4	0.844	RUNDC3A		NEK4	0	0	0	0
0.719	F8A3	0.685	ABCA8	0.726	HSDL2	0.844	RUNDC3A		MNAT1	0.257	0.563	0.912	0.408
0.719	LINC01399	0.685	ABCA8	0.726	HSDL2	0.844	TOP1MT		KRT71	1.326	0.838	0.469	0.872
0.719	EFNA2	0.685	OR2S2	0.726	HSDL2	0.844	TOP1MT		PHLDA2	0	0	0	0
0.719	PCDHA12	0.685	TTL	0.726	RGS18	0.844	LOC101929412		KRT31	0.04	0.04	0.04	0.055
0.719	PCDHA12	0.684	ARHGAP25	0.725	TANK	0.843	SYF2		GNGT1	0	0	0	0.158
0.719	SPTLC1	0.684	ARHGAP25	0.725	TANK	0.843	SYF2		TP53BP2	0	0.169	0	0
0.719	SPTLC1	0.684	NAV2	0.725	C9orf135	0.843	RAB40C		CUL4A	0.734	0.373	0.309	0.373
0.719	SPTLC1	0.684	CSNK1A1L	0.725	RPL27A	0.842	LOC100996255		CUL3	0.012	0	0.049	0.049
0.719	SNORD113-7	0.684	CAPS2	0.725	ARHGAP11A	0.841	PHLDB2		CUL2	0.31	0.769	0.187	0.31
0.718	MIR6822	0.684	CAPS2	0.725	RFX8	0.841	PHLDB2		CUL1	0	0	0	0
0.718	LRRFIP2	0.684	FANCE	0.725	TRPS1	0.841	VRK1		PDPK1	0	0	0	0.341
0.718	FCGR3B	0.684	PNMAL1	0.725	ICA1L	0.841	SMG1P3		OGG1	0	0.015	0.025	0
0.718	KLHDC8A	0.684	PNMAL1	0.724	PXDC1	0.841	MIR659		FGF10	0	0	0	0
0.718	DAOA-AS1	0.683	MIR100	0.723	CMTM1	0.84	RUNDC3A-AS1		PRAME	0	0	0	0
0.717	CMKLR1	0.682	ADH5	0.723	CMTM1	0.84	LOC102724084		KRT85	0.406	0.169	0	0
0.717	TVP23C	0.682	LINC00964	0.723	LOC339593	0.84	GINS1		SRPK2	0.451	0.039	0.039	0.41
0.717	TVP23C	0.682	NUDT4	0.722	CDC14B	0.84	RAB40C		NCF1	0.016	0.084	0.133	1.451
0.717	TVP23C-CDRT4	0.682	NUDT4	0.722	CDC14B	0.839	ACVR1C		GZMM	0.112	0	0.04	0
0.717	TVP23C-CDRT4	0.682	NUDT4	0.722	CMTM1	0.839	TM7SF2		FXR1	0	0	0	0
0.717	SLMO1	0.682	SMC2	0.722	CMTM1	0.839	TM7SF2		XPA	0.181	0.181	0.181	0.181
0.717	SLMO1	0.681	HRH1	0.722	CMTM1	0.839	TM7SF2		IGBP1	0	0	0	0
0.717	SPATA42	0.681	GLIPR1L2	0.722	CMTM1	0.839	GLTPD2		SYVN1	0.256	0.193	0.093	0.544
0.717	SPATA42	0.681	GLIPR1L2	0.722	CMTM1	0.839	MIR3945		ATG4D	0	0.14	0.14	0.028
0.716	APP	0.681	GLIPR1L2	0.722	CMTM1	0.838	MIR5581		PEG10	0.325	0.325	0.391	0.325
0.716	HCN2	0.681	OSR1	0.721	RAMP2-AS1	0.838	CDC73		ISL1	0	0.033	0	0
0.716	DKK4	0.681	HRH1	0.721	RAMP2-AS1	0.838	CSF2RB		SEMA5A	0.805	0.515	0.458	0
0.716	SNORD114-18	0.681	LOC100507053	0.721	MIR4467	0.838	MIR6808		SNW1	0.166	0.375	0	0
0.715	KLHDC8A	0.68	PCDHA12	0.721	IL1RAP	0.838	ANKRD65		IRF5	0	0	0	0
0.715	KLHDC8A	0.68	PCDHA12	0.721	IL1RAP	0.838	ANKRD65		NAE1	0	0.05	0.255	0.457
0.715	KLHDC8A	0.68	TAL2	0.721	IL1RAP	0.838	ANKRD65		NEUROD1	0.11	0.11	0.227	0.035
0.714	ENTHD2	0.68	MIR6730	0.721	IL1RAP	0.838	TXK		ACTC1	0	0	0.087	0
0.714	CD40	0.68	SLCO4A1-AS1	0.721	IL1RAP	0.837	NDUFA7		CAMK2D	0	0	0	0
0.714	CD40	0.679	CD300LF	0.721	IL1RAP	0.837	ITGB1		HDAC1	0.617	0.07	0.07	0.902
0.714	CD40	0.679	CD300LF	0.721	POC5	0.837	FALEC		RIPK1	0.401	0	0	0.329
0.714	CD40	0.679	CD300LF	0.72	CAST	0.837	EXO1		KRT1	0.233	0.221	0.232	0.437
0.714	C17orf89	0.679	CD300LF	0.72	SRSF3	0.836	LINC01399		LMTK2	0	0	0	0
0.713	RPS27	0.679	CD300LF	0.72	SRSF3	0.836	TMEM208		PIN1	0.672	0	0.649	0
0.713	DDR1	0.679	CD300LF	0.72	LOC101928661	0.836	RAB40C		LCN2	0.08	0.151	0.079	0.158
0.713	LOC101929705	0.679	CD300LF	0.72	MIR5697	0.836	RAB40C		SQSTM1	0.196	0.577	0.196	0.296
0.713	EPN2	0.679	CD300LF	0.72	RAMP2	0.835	LRRC29		TOX3	0	0	0	0
0.713	EPN2	0.679	FAM213B	0.72	MTSS1L	0.835	FAXDC2		NODAL	0	0	0	0.182
0.713	EPN2	0.679	FAM213B	0.719	SLC45A1	0.835	RAB40C		NGFR	0.028	0	0	0.084
0.713	PNMAL1	0.679	FAM213B	0.719	CORO7	0.835	SPTLC1		GRK5	0	0	0	0
0.713	PNMAL1	0.679	FAM213B	0.719	CORO7	0.835	SPTLC1		EVI2B	0	0.037	0.014	0
0.71	GFAP	0.679	FAM213B	0.719	CORO7-PAM16	0.835	SPTLC1		DSG4	0	0	0	0
0.71	GFAP	0.679	FAM213B	0.719	CORO7	0.835	ANXA6		AMIGO2	0	0	0	0
0.71	GFAP	0.678	LCE1F	0.719	LOC388406	0.835	PRSS1		HAND2	0	0	0	0
0.71	VPS72	0.678	DAW1	0.719	CYTH1	0.835	SLC4A7		PSME3	0.281	0.37	0.459	0.301
0.71	VPS72	0.678	MSRB3	0.718	SORT1	0.835	SLC4A7		RPL26	0.012	0	0.012	0
0.71	VPS72	0.678	NMBR	0.718	KLHDC8A	0.835	ZNF793-AS1		RPS3A	0	0.192	0.023	0
0.71	LINC00842	0.678	ZFYVE27	0.718	ADGB	0.834	LRRC29		MAX	0	0	0	0
0.71	GARNL3	0.678	GSN	0.718	TEX14	0.834	MDFI		DKKL1	0	0.177	0	0
0.71	GARNL3	0.677	SPDYA	0.718	TEX14	0.834	BICC1		EFNA5	0	0	0	0.044
0.709	CLDN25	0.677	SPDYA	0.718	TEX14	0.834	RPS28		IL6R	0.154	0.108	0.039	0.297
0.708	MAT2A	0.677	TUFT1	0.717	CD44	0.834	MYPN		SOS2	0.293	0.275	0.495	0.786
0.708	LOC100630918	0.677	TUFT1	0.717	CD44	0.834	MYPN		SOS1	0.047	0.047	0.047	0.047
0.707	C11orf70	0.677	TUFT1	0.717	CD44	0.834	MYPN		THEM4	0	0	0	0.204
0.707	C11orf70	0.677	CHCHD1	0.717	CD44	0.834	ELSPBP1		KRT16	0	0	0	0.038
0.707	MYEF2	0.677	COL4A1	0.717	CD44	0.834	TRAF3IP2-AS1		TLR2	0.103	0.102	0	0.103
0.707	MYEF2	0.677	COL4A1	0.717	CD44	0.834	TRAF3IP2-AS1		ANXA5	0	0.109	0.086	0
0.707	MYEF2	0.677	FBXO9	0.717	CD44	0.834	TRAF3IP2-AS1		KRT7	0	0	0	0
0.707	SNORA80A	0.676	CYTH3	0.717	CD44	0.834	TRAF3IP2-AS1		KRT19	0	0	0	0.329
0.706	LOC102724849	0.676	RFFL	0.717	MIR5191	0.833	ZNF793		LALBA	0.013	0	0.142	0
0.706	FCGR3B	0.676	LPAR3	0.717	NDUFS4	0.832	HIST1H3H		BTC	0	0	0	0
0.706	FCGR3B	0.675	LINC00319	0.717	ZNF487	0.832	PIN4P1		TNFRSF18	0.05	0	0	0.05
0.705	ABCD3	0.675	MIS18A	0.717	MIR5689	0.832	TPM4		FAS	0	0	0	0
0.705	ABCD3	0.675	MAN1C1	0.716	LINC01447	0.83	VMO1		CD27	0.508	0	0	0.481
0.705	SNORA77	0.675	MAN1C1	0.716	USP49	0.83	VMO1		TNFRSF8	0.272	0.272	0.84	0.091
0.705	OR10A6	0.675	GPAM	0.716	LINC01411	0.83	VMO1		HS1BP3	0.024	0.066	0	0
0.705	LRFN3	0.675	GPAM	0.716	KLHDC8A	0.83	VMO1		ITGA5	0	0	0	0
0.705	LIFR	0.675	COL4A2	0.716	KLHDC8A	0.829	MIR6513		HCK	0	0	0	0
0.705	SLC17A9	0.674	JUP	0.716	KLHDC8A	0.829	PPP2R2A		FGF4	0.265	0.826	0.265	0.696
0.705	SLC17A9	0.674	JUP	0.715	DBI	0.829	EHF		BEX3	0	0	0	0
0.704	MRPL44	0.674	CMSS1	0.715	RAD51C	0.827	RAB5C		MDM2	0	0	0	0
0.704	TMEM191A	0.673	LCE1D	0.715	RAD51C	0.827	RAB5C		WDR35	0.012	0.182	0.182	0
0.704	SAP18	0.673	NAV1	0.715	RAD51C	0.827	RAB5C		FGA	0	0	0.413	0
0.704	KRT6A	0.673	PSD3	0.715	RAD51C	0.827	SLC3A2		FGG	0	0	0.419	0
0.703	DDR1	0.672	CD82	0.715	PLEKHG4	0.827	LINC00885		ATF6	0	0.346	0.096	0.18
0.703	DDR1	0.672	CD82	0.715	PLEKHG4	0.827	NUDT4		ATF3	0.528	0	0	0.528
0.703	DDR1	0.672	FAM213B	0.714	NEDD4L	0.827	NUDT4		CD14	0.231	0.218	0	0
0.703	TRIO	0.672	FAM213B	0.714	NEDD4L	0.827	NUDT4		PAK5	0	0	0	0
0.702	MIR3656	0.671	GFOD1	0.714	NEDD4L	0.825	REV3L		BNIP3L	0	0.039	0.022	0.104
0.702	HNRNPA1P33	0.671	MEGF8	0.714	NEDD4L	0.825	REV3L		BMP6	0.686	0	0.517	0.171
0.701	ARHGEF39	0.671	MEGF8	0.714	H6PD	0.825	REV3L		BMP5	0	0	0	0
0.701	NLRP1	0.671	MKRN7P	0.714	TMEM38B	0.825	KIAA0586		VTCN1	0	0.059	0.059	0.102
0.701	NLRP1	0.67	LINC00396	0.714	LOC100288748	0.824	LINC01450		SSTR3	0.049	0	0.014	0.054
0.701	NLRP1	0.67	SYT4	0.714	KRTAP10-6	0.823	ARCN1		SFRP5	0.312	0.468	0	0.469
0.701	NLRP1	0.669	CAPSL	0.714	TMEM133	0.823	ARCN1		SENP1	0.054	0.029	0	0
0.701	NLRP1	0.669	CAPSL	0.713	DBI	0.822	HYI		NBN	0	0	0	0
0.701	MIR23B	0.668	LOC100506406	0.713	KIAA1429	0.822	HYI		NOL3	0.037	0.091	0.037	0.19
0.7	SNORD114-17	0.668	NUDT4P1	0.713	KIAA1429	0.822	HYI		CD38	0.087	0.087	0.151	0.078
0.7	NXNL2	0.668	CPEB4	0.713	GOLGA8M	0.822	CAP2		GSKIP	0.047	0.095	0	0.156
0.7	NXNL2	0.668	MIR8077	0.712	DBI	0.821	UCK2		KRT77	0.554	0.555	0.553	0.64
0.698	MIR27B	0.667	NUDT4P2	0.712	DBI	0.821	SKAP2		CDKN2D	0	0.051	0.052	0
0.698	SLC25A18	0.667	LOC728040	0.712	DBI	0.82	FAM107A		ADAR	0.25	0	0.415	0
0.698	SLC25A18	0.667	NUDT4	0.712	LOC731424	0.82	CD93		TFAP2D	0	0	0	0
0.697	TSPYL4	0.667	NUDT4	0.712	NEXN-AS1	0.82	C15orf53		NDUFA13	0	0	0	0
0.697	RGPD3	0.667	DNMT3A	0.712	MIR4435-2	0.82	CCNI2		KLK14	0	0.344	0	0.919
0.697	TFF3	0.667	OR1D2	0.712	MIR4435-1	0.82	CCNI2		FGD2	0.211	0.157	0.189	0.662
0.697	SNORD113-9	0.667	MESDC2	0.712	CCL14	0.82	CCNI2		SH3RF1	0	0	0	0
0.696	SNORD91A	0.667	MESDC2	0.712	CCL14	0.819	MIR4708		RBM25	0	0	0	0.312
0.696	SPARC	0.667	MESDC2	0.712	DBI	0.819	EXO1		PDGFRB	0.169	0.254	0.218	0.121
0.696	FCGR3B	0.666	MOCS3	0.712	DBI	0.819	EXO1		NCKAP1L	0	0	0	0
0.696	FCGR3B	0.666	MIR153-1	0.712	DBI	0.818	ZNF552		NET1	0	0.013	0.035	0.054
0.696	LINC00521	0.666	GREM2	0.712	DBI	0.818	FOXA3		SON	0.684	0.159	0.841	0.398
0.696	LINC00521	0.666	MIR6081	0.712	DBI	0.818	HIST1H2BM		ZFP36L1	0.038	0.069	0	0.172
0.696	PUM2	0.665	SLC12A5	0.712	DBI	0.818	HIST1H2AJ		HSF1	0	0	0	0
0.696	PUM2	0.665	DFFA	0.712	DBI	0.818	PDIK1L		CDK4	0	0	0	0
0.695	RFX2	0.665	DFFA	0.711	LOC101929412	0.817	PRRT3-AS1		ADCYAP1	0.177	0.233	0	0
0.695	RFX2	0.665	ZGPAT	0.711	ZNF33B	0.816	LOC100093631		IL2RA	0.326	0	0.072	0.394
0.695	LOC101927450	0.665	ZGPAT	0.711	ZNF33B	0.816	C7orf61		EPO	0	0	0	0
0.695	CARD10	0.665	ZGPAT	0.711	ZNF33B	0.816	CELA2A		IL1B	0.409	0	0	0.401
0.695	LINC00521	0.665	ZGPAT	0.711	ZNF33B	0.816	FANCE		IL1A	0.052	0	0	0.117
0.695	KRT75	0.664	SLTM	0.711	ZNF33B	0.816	TMEM14B		IFNG	0.066	0.584	0	0.516
0.695	LOC102724659	0.664	SLTM	0.711	ZNF33B	0.816	TMEM14B		IFNB1	0	0	0.459	0
0.694	IL24	0.664	FBXO9	0.711	ZNF33B	0.816	TMEM14B		IFNA2	0	0	0	0
0.694	IL24	0.664	ARFRP1	0.711	ZNF33B	0.816	TMEM14B		SHC4	0	0	0.801	0
0.694	IL24	0.664	ARFRP1	0.711	ZNF33B	0.816	TMEM14B		HIGD2A	0.954	0.951	0.48	0.972
0.694	IL24	0.664	ARFRP1	0.711	ZNF33B	0.816	TMEM14B		ASNS	0.025	0	0	0
0.694	IER5	0.664	ARFRP1	0.711	ZNF33B	0.815	CREBBP		HSP90AB1	0	0	0	0
0.694	HOXA1	0.664	ARFRP1	0.711	ZNF33B	0.815	CREBBP		ERCC5	0	0.033	0	0.032
0.694	HOXA1	0.664	ARFRP1	0.711	GALNT14	0.815	CMIP		PHB	0	0	0	0
0.693	DMP1	0.664	ARFRP1	0.711	GALNT14	0.815	GNE		PCGF2	0.541	0	0	0.541
0.693	DMP1	0.664	ARFRP1	0.711	GALNT14	0.815	GNE		IL13	0	0.025	0	0.466
0.693	LRRFIP1	0.664	ARFRP1	0.711	C2orf76	0.815	GNE		CTNNB1	0	0.018	0	0.319
0.693	LRRFIP1	0.664	ARFRP1	0.711	ARID1A	0.815	SNORD62B		CTNNA1	0	0	0	0
0.693	LRRFIP1	0.664	ARFRP1	0.711	ARID1A	0.815	SNORD62A		LRP1	0	0	0	0.602
0.693	LRRFIP1	0.664	ARFRP1	0.71	NMBR	0.815	CADM4		TMF1	0	0.024	0	0.109
0.692	MIR7641-2	0.664	GSN	0.71	LINC01159	0.814	MICAL1		CLN3	0	0	0	0
0.692	MIR24-1	0.663	GPR116	0.71	LINC01159	0.814	ARHGDIA		DHRS2	0.022	0	0	0.087
0.692	PLK4	0.663	LOC643339	0.71	PYGL	0.814	ARHGDIA		MAD2L1	0	0	0	0.043
0.692	SLC35F2	0.663	AP1B1	0.71	PYGL	0.814	ARHGDIA		NOG	0	0	0	0
0.691	TRAPPC4	0.663	AP1B1	0.71	OLFML2A	0.814	ARHGDIA		SRSF6	0	0	0	0
0.691	MIR3074	0.663	AP1B1	0.709	MEPE	0.814	ARHGDIA		TRIM24	0.192	0.193	0	0.192
0.691	HOTAIRM1	0.662	CAPN9	0.708	PRICKLE2-AS3	0.814	ARHGDIA		PLSCR1	0.041	0.108	0.107	0.079
0.691	HOTAIRM1	0.662	CAPN9	0.708	VDAC3	0.814	SYMPK		MDM4	0.158	0	0	0.28
0.691	OTUB2	0.662	ZFYVE27	0.708	VDAC3	0.814	NFIX		DNAJC3	0	0	0	0
0.691	TMEM41B	0.662	ZFYVE27	0.707	COG1	0.814	C19orf67		ING3	0.462	0.464	0.463	0
0.691	TMEM41B	0.662	ZFYVE27	0.706	SORT1	0.813	KISS1		CLEC5A	0.016	0	0.07	0.069
0.691	TMEM41B	0.662	ZFYVE27	0.706	FLOT1	0.813	LOC339807		MUSK	0.016	0	0.288	0
0.69	MIR4684	0.662	ZFYVE27	0.706	CREB5	0.812	GPR116		MIF	0	0.379	0.397	0.526
0.69	SH2D4A	0.662	ZFYVE27	0.704	CD300LF	0.812	HES1		PLEKHF1	0	0	0	0
0.69	SH2D4A	0.662	TP73	0.704	CD300LF	0.811	NSMCE1		E7EVH7	0	0	0	0
0.69	LMNB2	0.662	TP73	0.704	CD300LF	0.811	MYSM1		TRIB3	0	0	0.102	0
0.689	GOLT1A	0.662	TP73	0.704	CD300LF	0.81	ZC3H10		CSRNP1	0.388	0.569	0.569	0.763
0.689	ACER3	0.662	TP73	0.704	CD300LF	0.81	MYO16-AS1		USP28	0.124	0.023	0	0.124
0.689	ACER3	0.662	TP73	0.704	CD300LF	0.81	NUDT4P1		SIRT5	0	0	0	0
0.689	ACER3	0.662	TP73	0.704	CD300LF	0.81	SPATA32		LACRT	0	0	0	0
0.689	ACER3	0.662	GS1-600G8.3	0.704	CD300LF	0.809	MAP3K14-AS1		KDELR1	0	0	0	0.293
0.689	SYT4	0.661	LOC100506444	0.703	ATP6V1G3	0.809	MAP3K14-AS1		MFF	0.035	0.013	0	0
0.689	ATXN1	0.661	CHSY3	0.703	ATP6V1G3	0.809	ZC2HC1B		CHM	0	0	0	0
0.689	ATXN1	0.661	ABCA6	0.703	LOC102724957	0.809	ERF		ARHGEF11	0	0	0	0
0.689	LRRFIP2	0.661	KRT25	0.703	DENND2D	0.809	NUDT4P2		ANKRD2	0.511	0.512	0	0.559
0.689	LRRFIP2	0.66	DDX28	0.702	ZC2HC1B	0.809	ORC2		AIMP2	0.194	0.194	0.194	0.194
0.689	CREM	0.66	ARFRP1	0.702	PPP4R1-AS1	0.809	ORC2		MCF2L	0.541	0	0.542	0.314
0.689	CREM	0.66	LINC00705	0.702	FAM171B	0.808	NUDT4		PRKAA1	0.138	0.049	0.049	0.298
0.689	CREM	0.66	DPM1	0.7	TMEM145	0.808	NUDT4		CELA2A	0.974	0.81	0.32	0.816
0.689	CREM	0.659	GOLGA8M	0.7	ENSA	0.808	HNRNPF		UCN	0	0	0	0
0.689	MIR1184-3	0.659	C8orf88	0.7	ENSA	0.808	INMT-FAM188B		FGF8	0.174	0.717	0.28	0.719
0.689	MIR1184-1	0.659	TIMP4	0.7	ENSA	0.808	INMT		DIO3	1.392	0.067	0.816	1.669
0.689	MIR1184-2	0.658	CEP131	0.7	ENSA	0.808	INMT		VCP	0.216	0	0	0.202
0.689	SH2D4A	0.658	CEP131	0.7	ENSA	0.808	MPZL1		CSE1L	0	0	0	0
0.688	KAT2A	0.657	LINC01114	0.698	DDX60	0.808	MPZL1		C6orf120	0	0.028	0	0
0.688	BMPER	0.656	KRR1	0.698	SPECC1L	0.808	MPZL1		TCHH	0.536	0.066	0.011	0.049
0.688	SEC61A1	0.656	GKAP1	0.698	SPECC1L	0.808	FLJ21408		AIF1	0	0	0	0.264
0.688	AKNAD1	0.656	GKAP1	0.698	SPECC1L	0.807	PLEKHA6		CDKN1A	0.042	0.042	0.077	0.184
0.687	UHRF1	0.656	OXGR1	0.698	SPECC1L-ADORA2A	0.807	FCGR3B		IGF2R	0	0	0	0.536
0.687	UHRF1	0.656	RRAD	0.697	LINC00499	0.806	NKX3-1		LIMS2	0.665	0.109	0.74	0.293
0.687	SMIM2-IT1	0.656	RRAD	0.697	CHSY1	0.806	NKX3-1		TGM2	0.049	0.049	0.068	0
0.687	NFATC2	0.655	FAM9C	0.697	PHYHD1	0.806	NKX3-1		USP53	0.066	0.066	0	0
0.687	NFATC2	0.655	SCN11A	0.697	MB	0.805	SLC3A2		ANXA6	1.722	0.827	1.13	1.008
0.687	NFATC2	0.655	OSBP2	0.696	MRPL53	0.805	ROBO3		KRT25	0.311	0.661	0.662	0.709
0.687	NFATC2	0.655	TTC3	0.695	FHOD1	0.805	PROZ		KRT26	0.281	0.469	0.47	0.484
0.687	SERPINB10	0.654	KCNK18	0.695	TTC32	0.805	PROZ		KRT27	0.328	0.463	0.463	0.463
0.687	RPS25	0.654	WNT8A	0.695	SMR3A	0.804	PTBP1		KRT28	0.572	0.639	0.639	0.639
0.686	BMP6	0.654	WNT8A	0.694	LOC101928453	0.804	PTBP1		PARP1	0.36	0	0	0
0.686	SYCE2	0.654	WNT8A	0.694	LOC100507144	0.804	PTBP1		GRINA	0	0	0	0
0.686	FAM135A	0.654	WNT8A	0.694	HRH1	0.804	MIR5197		RNF144B	0.594	0.433	0.595	1.026
0.686	SFTPB	0.654	BTBD3	0.693	ENSA	0.804	TRIM38		CECR2	0.346	0.419	0.341	0.505
0.686	SFTPB	0.654	BTBD3	0.693	ENSA	0.804	RNF20		DDR1	0.747	0.04	0.569	0.637
0.686	CASQ2	0.654	BTBD3	0.693	ENSA	0.803	NACA		DDR2	0.3	0.049	0.114	0.066
0.685	MIR8067	0.654	HMGA1P7	0.693	ATG14	0.803	LOC643339		TNF	0	0	0	0.39
0.684	SON	0.654	LOC100132352	0.692	SLA2	0.803	MIR1273A		LTA	0	0	0	0.364
0.684	SON	0.653	NXF1	0.692	SLA2	0.803	CASC18		CHI3L1	0.646	0	0	0
0.684	SON	0.653	NXF1	0.692	CNOT8	0.803	CASC18		USP17L1	0	0	0	0
0.684	SON	0.653	HERPUD1	0.692	CNOT8	0.802	NACA		WNT4	0.375	0	0	0
0.684	SON	0.653	HERPUD1	0.692	CNOT8	0.802	NACA		PRODH	0	0	0	0
0.684	WWC1	0.653	HERPUD1	0.692	CNOT8	0.802	ERF		OBSCN	0.375	0	0	0
0.684	WWC1	0.653	MIR7641-2	0.692	CNOT8	0.801	SLC27A4		ITGB1	0.637	0.734	1.17	0.837
0.684	WWC1	0.653	POU6F1	0.692	CNOT8	0.801	LOC100131564		SIAH2	0.16	0	0.332	0.16
0.684	OR51E1	0.653	IL36A	0.692	CNOT8	0.801	ARHGDIA		GATA1	0	0	0	0
0.684	EFTUD2	0.653	DDB2	0.692	CNOT8	0.801	ARHGDIA		2018-09-04	0	0	0.071	0.506
0.684	MIR5581	0.653	DDB2	0.692	MB	0.8	BYSL		GLO1	0	0	0	0.068
0.684	CHMP1B	0.652	FAM49B	0.691	HCRT	0.8	MED20		PRKCQ	0.011	0	0.029	0
0.683	LINC00260	0.652	FAM49B	0.691	LBX2	0.799	MLXIP		TLE1	0.236	0.128	0.458	0
0.683	EIF3L	0.652	FAM49B	0.689	PPP4R1-AS1	0.799	LOC101929450		NOTCH2	0	0	0	0
0.683	EIF3L	0.652	CAST	0.689	LOC101927296	0.799	LOC101929450		DSP	0	0.472	0	0.578
0.683	SNORD114-16	0.652	ICT1	0.688	MOCS1	0.799	LOC101929450		RAG1	0.879	0.382	0	0.523
0.683	PAFAH2	0.652	ICT1	0.688	MOCS1	0.799	ZC3H10		IFIT3	0	0	0	0
0.683	DDR1	0.652	DUS2	0.688	DEXI	0.799	ZC3H10		ZSWIM2	0.053	0.053	0.053	0.053
0.683	UHRF1	0.652	DUS2	0.688	LNPEP	0.799	DR1		RPS6	0	0	0	0
0.682	LOC101929723	0.652	DUS2	0.688	LIFR	0.799	TXNDC16		RHOB	0.13	0.13	0.156	0.24
0.682	LOC101929723	0.652	CAST	0.688	RASSF6	0.799	TXNDC16		KPNB1	0	0	0	0.255
0.682	RGS5	0.652	TGFBR2	0.688	RASSF6	0.799	LOC100506281		PPP2CB	0	0	0.198	0
0.682	RGS5	0.652	TGFBR2	0.688	RASSF6	0.798	LINC01366		STAT1	0.607	0.608	0.377	0
0.682	RGS5	0.652	MMP8	0.688	RASSF6	0.798	LINC01366		NFATC4	0.559	0	0	0
0.682	EFTUD2	0.652	MMP8	0.688	TRPM1	0.798	LINC01366		APP	0.897	0.194	1.037	0.588
0.682	EFTUD2	0.652	MMP8	0.688	CNOT8	0.798	NFIX		MRE11	0	0	0	0
0.682	EFTUD2	0.652	SLA	0.687	TBX5	0.798	PDIK1L		KRT17	0	0	0	0
0.682	FAM168A	0.652	SLA	0.687	TMEM207	0.798	PDIK1L		RRP8	0	0	0	0
0.682	FAM168A	0.652	SLA	0.686	LIFR-AS1	0.798	WFDC12		ECSCR	0.146	0.146	0.146	0.073
0.682	FAM168A	0.652	SLA	0.686	LIFR-AS1	0.797	GPR137C		NSMF	0	0	0	0
0.682	CSNK1A1L	0.651	MORN4	0.686	PLEKHG7	0.797	EIF3L		FRZB	0	0	0	0
0.682	ADH5	0.651	CAST	0.685	KIF13B	0.797	EIF3L		C19orf12	0	0	0	0
0.682	FSTL3	0.651	KLHL10	0.685	PIP5K1A	0.797	HNRNPF		GRM4	0	0	0	0.566
0.682	CCDC103	0.651	FOSL2	0.685	PIP5K1A	0.797	FCGR3B		TFAP2A	1.22	0.743	0.619	0.795
0.682	CCDC103	0.651	SPEN	0.685	PIP5K1A	0.797	FCGR3B		MEF2D	0.163	0.164	0	0.163
0.682	CCDC103	0.651	HAT1	0.685	PIP5K1A	0.796	CA9		PRAMEF25	0	0	0	0
0.682	CCDC103	0.651	HAT1	0.685	ANXA6	0.795	MDFI		ARHGDIA	0.403	0	0.149	0.814
0.682	CCDC103	0.65	CRB1	0.685	PAPD7	0.795	MDFI		NLRP12	0.052	0.123	0	0.052
0.682	CCDC103	0.65	GGCX	0.685	PAPD7	0.795	MDFI		MUC1	0.206	0	0.073	0.288
0.681	TAF7	0.65	GGCX	0.685	ANKRD33	0.795	PLCH1		MTOR	0	0	0	0
0.681	PLK4	0.65	TNFRSF9	0.685	ANKRD33	0.795	PLCH1		GRID2	0	0	0	0
0.681	PLK4	0.65	DYRK1A	0.685	ANKRD33	0.795	TFAP2A		CBL	0.865	0	0	0.472
0.681	LOC101928886	0.65	LTV1	0.685	ANKRD33	0.795	GCKR		UNC5A	0	0.025	0	0
0.681	BCAS2	0.65	GSN-AS1	0.685	DTD2	0.795	PRKACA		GSK3B	0	0	0	0
0.68	GART	0.65	TOMM40	0.684	PRICKLE2	0.794	TMEM185B		GSK3A	0.02	0.032	0.032	0.731
0.68	GART	0.65	TOMM40	0.684	MAP4K4	0.794	C7orf57		SHC1	0.246	0.216	0	0.282
0.68	PCDHGB1	0.65	TOMM40	0.684	MAP4K4	0.794	C7orf57		PTPN6	0	0	0.283	0
0.68	PCDHGB1	0.65	TNIP1	0.684	MAP4K4	0.794	C7orf57		FGFR3	0	0	0.11	0.089
0.68	LOC100507053	0.649	PPP1R35	0.684	CSNK1A1L	0.794	OR6C76		TSC2	0	0	0.05	0.05
0.68	ADAMTS12	0.649	ZGPAT	0.684	PPP4R1	0.794	C19orf24		BCL11B	0.486	0	0.278	0
0.679	GSN	0.649	EDEM2	0.684	PPP4R1	0.793	GHDC		AMBRA1	0.176	0.156	0.156	0
0.679	CYTH3	0.649	EDEM2	0.684	PPP4R1	0.793	GHDC		JADE1	0	0	0	0
0.679	DNAL4	0.649	EDEM2	0.683	HRH1	0.793	LINC00589		SET	0.05	0	0.05	0.05
0.678	ECEL1	0.647	MTFR1	0.683	EIF3L	0.793	PTX3		KRT4	0	0	0.016	0.561
0.678	ECEL1	0.647	MTFR1	0.683	EIF3L	0.792	MMP24		KRT15	0	0	0	0.226
0.678	TNS3	0.646	SEC31B	0.682	GRIK4	0.792	KCND3		KRT23	0.099	0	0.098	0.152
0.678	SPDYA	0.645	LMNB2	0.682	GRIK4	0.792	KCND3		FHIT	0	0	0	0
0.678	SPDYA	0.645	DSTYK	0.682	LINC01031	0.792	CAST		HINT1	0	0.345	0	0.345
0.677	TM4SF4	0.645	DSTYK	0.682	FAM168A	0.792	CAST		FLT3LG	0	0.025	0	0
0.677	PSD3	0.645	FLJ37453	0.682	FAM168A	0.792	CAST		CTGF	0	0.051	0.144	0.051
0.676	MIS18A	0.645	ARID1A	0.682	FAM168A	0.792	WDFY1		TRIM2	0.358	0.575	0	0.357
0.676	KLRC1	0.645	ARID1A	0.681	IER3	0.791	PPP2R2A		SPRR2E	0	0.159	0	0
0.675	DENND2D	0.644	PIK3C2A	0.681	LBX2-AS1	0.79	LOC643355		COMP	0.083	0	0	0.131
0.675	SNORD113-6	0.644	ARL14EPL	0.681	KCTD15	0.79	TNXB		SPRR1B	0	0.013	0	0
0.675	LINC01510	0.644	SNORD113-1	0.681	KCTD15	0.79	ARL17A		MCM2	0	0	0	0
0.675	RCVRN	0.644	SCAND1	0.681	KCTD15	0.79	GFM2		METTL21C	0.047	0.557	0	0.047
0.674	FAH	0.643	XRCC4	0.68	TSGA10	0.79	GFM2		E2F1	0.578	0.023	0.047	0.047
0.674	CTPS1	0.643	XRCC4	0.679	SPARC	0.79	GFM2		PDE3A	0.155	0	0.352	0
0.674	CTPS1	0.643	XRCC4	0.679	MIR6501	0.79	GFM2		TIAL1	0	0	0	0
0.674	NMBR	0.643	TMEM167A	0.679	ESRP1	0.79	GFM2		PDE1B	0	0	0	0
0.674	KLRC1	0.643	SCAND1	0.679	ESRP1	0.789	CBX3P2		MT3	0.175	0.447	0.432	0
0.674	KLRC1	0.643	FAM222A-AS1	0.679	ESRP1	0.789	FCGR3B		SLC25A6	0	0	0	0
0.674	METRNL	0.643	FAM222A-AS1	0.679	ESRP1	0.789	FCGR3B		SLC25A4	0	0	0	0
0.673	ZNF529	0.643	SLAIN1	0.679	ESRP1	0.788	BFSP1		ZNF205	0	0	0	0
0.673	ZNF709	0.643	SLAIN1	0.678	NBAT1	0.788	BFSP1		NAA35	0.285	0.255	0.039	0
0.672	PIN1	0.643	SLAIN1	0.678	LINC00486	0.788	BFSP1		CXCR3	0	0	0	0
0.672	PIN1	0.643	SLAIN1	0.678	MIR548AI	0.786	PGS1		GAL	0	0	0.035	0
0.672	PIN1	0.643	LRRC37A2	0.678	AARD	0.786	PGS1		STAR	0.015	0.055	0.04	0.102
0.672	DNAJB5	0.642	TLDC1	0.678	C7orf57	0.786	PGS1		PCSK6	0	0	0	0
0.672	DNAJB5	0.642	SLC2A4RG	0.678	C7orf57	0.786	PGS1		CREB3	0.56	0.514	0.516	0.61
0.672	AHSP	0.642	TLL2	0.678	C7orf57	0.786	KIAA0907		CD5L	0	0	0	0
0.672	CA10	0.642	MLEC	0.678	PTPN4	0.786	SOS2		SHF	0.312	0	0.312	0.312
0.672	ABR	0.642	MLEC	0.677	TTL	0.786	LOC283352		PIH1D1	0	0.061	0	0
0.671	SNORD114-15	0.642	IL9	0.677	MIR3650	0.786	LOC283352		GRAMD4	0	0	0	0
0.671	UHRF1	0.642	EXTL1	0.677	QPCT	0.785	ZNF114		TIMM50	0.107	0.052	0	0.045
0.671	FCGR2B	0.641	JAK1	0.677	SLC9A5	0.785	ANAPC16		ARHGEF26	0.403	0	0	0.403
0.671	FCGR2B	0.641	ATP5O	0.677	WDR12	0.785	ANAPC16		CARD16	0.017	0.318	0.244	0
0.671	FCGR2B	0.641	KCTD3	0.677	C2orf15	0.785	ANAPC16		VAV1	0.395	0.191	0	1.057
0.671	FCGR2B	0.641	KIDINS220	0.677	CARF	0.785	ANAPC16		ARHGEF16	0.06	0	0.06	0
0.671	FCGR2B	0.64	C9orf92	0.677	CARF	0.785	ANAPC16		PDGFRA	0.721	0.041	0.017	0
0.671	LOC90768	0.64	LINC01559	0.677	CARF	0.785	ANAPC16		PRAMEF27	0	0	0	0
0.671	LOC90768	0.639	KRT28	0.677	CARF	0.784	YY1AP1		PRAMEF22	0	0	0	0
0.67	DNAJB5-AS1	0.639	ATP6V1G3	0.677	CARF	0.784	YY1AP1		HPGD	0.212	0.229	0	0.469
0.67	MEAF6	0.639	ATP6V1G3	0.677	MKRN7P	0.784	KRTAP16-1		KRT2	0.11	0.071	0.109	0.63
0.67	MEAF6	0.639	ST3GAL5	0.677	HIF1AN	0.784	NCOA6		KRT20	0.034	0.022	0.034	0.034
0.67	MEAF6	0.639	MIR6070	0.676	C1QTNF5	0.784	NCOA6		TNFAIP8L2	0.24	0.043	0.174	0.24
0.67	MEAF6	0.639	LOC644554	0.675	SEMA4D	0.784	ASCC1		RELA	0.461	0.057	0.039	0.242
0.67	MEAF6	0.638	TCF7L2	0.675	SEMA4D	0.784	NSA2		FOSL1	0	0	0	0.104
0.67	MEAF6	0.638	TCF7L2	0.674	MIR4288	0.784	NSA2		YWHAE	0	0.058	0	0
0.67	IGFBPL1	0.638	TCF7L2	0.674	PUM2	0.784	NSA2		EIF2S1	0	0	0	0
0.67	COA7	0.638	TCF7L2	0.674	PUM2	0.783	ZNF83		USP17L3	0	0.027	0	0
0.67	MIR4653	0.638	TCF7L2	0.674	MAP4K4	0.783	ZNF83		BECN1	0.356	0.438	0.491	0.353
0.669	OR1D2	0.638	TCF7L2	0.674	MAP4K4	0.783	ZNF83		MPO	0.022	0	0.022	0
0.669	CD276	0.638	TCF7L2	0.674	CMA1	0.783	ZNF83		SLC25A5	0	0	0.023	0.59
0.669	CD276	0.638	TCF7L2	0.674	PROL1	0.783	ZNF83		NKX2-6	0	0	0	0.585
0.669	KCNA5	0.638	TCF7L2	0.674	PROL1	0.783	TFAP2A-AS1		WDR73	0	0	0	0
0.668	DPAGT1	0.638	TCF7L2	0.674	PROL1	0.783	KCNK7		PRKCG	0	0.012	0	0
0.668	SRRD	0.638	TCF7L2	0.673	ZBTB20	0.783	KCNK7		SPOP	0.144	0.144	0	0.145
0.668	ZNF529-AS1	0.638	TCF7L2	0.673	USP46-AS1	0.783	KCNK7		SERPINE1	0.284	0.271	0.283	0.115
0.668	ZNF529-AS1	0.638	TCF7L2	0.673	CD9	0.783	KCNK7		SERPINB2	0.341	0.076	0.076	0.415
0.668	ZNF529-AS1	0.637	TNIP1	0.673	USP10	0.783	TFAP2A		IL4	0.02	0.067	0.02	0.51
0.668	ZNF529-AS1	0.637	TNIP1	0.673	USP10	0.783	ZFP69		S100A8	0	0.375	0.021	0
0.668	TACSTD2	0.637	CCDC148-AS1	0.673	USP10	0.783	MICALL2		ITGB2	0	0	0	0.103
0.667	HPS4	0.637	MORN4	0.673	USP10	0.783	TRIM6-TRIM34		PDX1	0.521	0	0.368	0
0.667	HPS4	0.637	KRT75	0.673	BPESC1	0.783	TRIM6		NKX2-5	0.583	0	0.559	0.035
0.667	SIX3	0.636	ZBTB41	0.673	MIR4653	0.783	TRIM6		AHR	0.326	0.26	0.431	0.103
0.667	ESR2	0.636	TMEM87B	0.672	USP46	0.783	TRIM6		ATF2	0	0	0	0
0.667	ESR2	0.635	LOC100288911	0.672	USP46	0.783	S100A16		PSMC5	0	0	0	0
0.667	ESR2	0.635	LOC339529	0.672	USP46	0.783	TMEM38B		GAS6	0	0	0	0
0.667	SIX3-AS1	0.634	IL20	0.672	WHSC1	0.783	TPRG1L		PPP1CA	0	0	0.411	0
0.667	STX5	0.634	FLJ31356	0.671	CLEC16A	0.782	YY1AP1		GNA13	0	0.251	0	0
0.667	STX5	0.634	VWA2	0.671	CLEC16A	0.782	HNF4G		FKBP8	0	0	0	0.421
0.667	CDRT4	0.634	RORA-AS2	0.671	APTR	0.781	LINC00176		RRM2B	0.012	0.135	0.135	0.135
0.667	LMO4	0.634	RORA-AS2	0.671	MIIP	0.781	LINC00176		CD40	0.714	0.931	0.29	0.635
0.667	PCBP4	0.634	NAV2	0.671	SLC39A13	0.781	CCDC87		PRAMEF8	0	0.233	0	0
0.666	SLC44A5	0.634	NAV2	0.671	SLC39A13	0.781	ZNF570		PRAMEF15	0	0.069	0	0
0.666	SLC44A5	0.634	NAV2	0.67	LPAR3	0.781	YY1AP1		PRAMEF13	0	0	0	0
0.666	FAM110B	0.634	HNRNPF	0.67	NFYC	0.781	ENSA		B4GALT1	0.474	0	0	0.473
0.666	ACHE	0.633	GPX4	0.67	NFYC	0.781	ENSA		PARK2	0.027	0.027	0	0
0.666	GSN	0.633	GPX4	0.67	NFYC	0.781	ENSA		RPS7	0.09	0.109	0.228	0.109
0.665	LIMS2	0.633	PEX14	0.67	NFYC	0.781	ENSA		FASTK	0	0	0	0
0.665	SNORD114-20	0.633	ST3GAL5-AS1	0.67	POLB	0.781	ENSA		GAS2	0	0	0	0
0.665	LL22NC03-75H12.2	0.632	KISS1	0.67	TANK	0.781	YY1AP1		CDC34	0.068	0	0.025	0
0.664	SNORD114-14	0.632	FOXRED2	0.669	MEGF8	0.781	YY1AP1		ARRB1	0	0	0	0
0.664	C10orf126	0.632	LOC100505984	0.669	MEGF8	0.781	YY1AP1		HMGA2	0	0.033	0	0.033
0.663	SIX3-AS1	0.632	DYRK1A	0.668	NAALADL2-AS2	0.781	ASCC1		NCK2	0.178	0	0	0
0.663	CLPTM1	0.632	DYRK1A	0.668	CHML	0.781	ASCC1		DAB2IP	0.448	0.496	0.604	0.607
0.663	GPX4	0.632	FOXRED2	0.668	CAV1	0.78	TFAP2A		SNAI2	0	0	0	0
0.663	GPX4	0.632	LOC100126784	0.668	C1QTNF7	0.78	ENSA		PRAMEF18	0	0	0	0
0.662	PRSS23	0.631	OC90	0.668	MIR8077	0.78	ENSA		FNTA	0.04	0	0	0
0.662	SPINT3	0.63	FAH	0.668	ESR2	0.78	ENSA		POU3F4	0.662	0	0	0.316
0.662	ENTPD3-AS1	0.63	LINC01468	0.668	ESR2	0.78	IL9		ZNF443	0.381	0.194	0.195	0.27
0.662	KRT24	0.63	IL36RN	0.668	ESR2	0.779	KRT24		SPRY2	0	0	0	0
0.662	EPB41L5	0.629	DYRK1A	0.667	MIR3925	0.779	DDI2		ATF5	0.066	0.204	0	0.293
0.662	EPB41L5	0.629	SYBU	0.667	KCNH4	0.778	MICAL1		TNFSF14	0.031	0.057	0	0.091
0.662	EPB41L5	0.629	SYBU	0.667	SIX3	0.778	MICAL1		XRCC2	0.26	0	0.284	0.448
0.662	SEPT4-AS1	0.629	ELAC1	0.667	SIX3-AS1	0.778	CDCA4		FOXO3	0	0	0	0
0.662	COTL1	0.629	THEGL	0.666	CAV1	0.778	CDCA4		TNFSF12	0.168	0	0	0.529
0.662	CTXN3	0.628	AP1M1	0.666	MIR8067	0.777	TRIM6		LAMTOR5	0	0	0	0
0.662	OTOGL	0.628	AP1M1	0.665	VPS72	0.777	DRGX		ADAMTS20	0	0	0	0
0.662	ACHE	0.628	PAPPA	0.665	VPS72	0.777	CCS		TIAF1	0.397	0.396	0.103	0
0.662	ACHE	0.628	CREB3L1	0.665	VPS72	0.777	PPP1R35		NISCH	0.126	0	0	0.125
0.662	ACHE	0.628	PSMD14	0.665	LOC101929095	0.777	RGL2		CCL3	0	0	0	0
0.662	POU3F4	0.627	LINC00521	0.665	TCL1A	0.777	RGL2		HPN	0.363	0.362	0.362	0.638
0.661	GPR25	0.627	LINC00521	0.665	TCL1A	0.777	MROH8		PANO1	0.245	0.094	0.093	0.646
0.661	GART	0.627	ACVRL1	0.665	TCL1A	0.777	MROH8		CX3CR1	0	0	0	0
0.661	GART	0.627	P4HA2	0.664	SPI1	0.777	MROH8		ACER2	0	0	0	0
0.661	LOC101928841	0.627	P4HA2	0.664	SPI1	0.776	MTSS1L		EDN1	0.618	0.119	0.059	1.247
0.66	ACHE	0.627	NR2F1-AS1	0.664	C1QTNF7	0.776	RAPGEF1		HK2	0.252	0.253	0.506	0
0.66	LINC00319	0.627	NR2F1-AS1	0.663	LRRC8A	0.776	EIF2AK2		RBM5	0.06	0	0	0
0.66	HKR1	0.627	NR2F1-AS1	0.663	MIR3616	0.776	EIF2AK2		KLF4	0	0	0	0
0.659	KLHL20	0.627	NR2F1-AS1	0.663	SIX3-AS1	0.775	S100A1		HTRA2	0.327	0.325	0.757	0.339
0.659	GALNT14	0.627	NR2F1-AS1	0.663	CHI3L2	0.775	ZNF227		VAV2	0	0	0	0
0.659	GALNT14	0.627	NR2F1-AS1	0.663	TMEM248	0.775	ZNF227		ICAM1	0	0	0	0.448
0.659	GALNT14	0.627	NR2F1-AS1	0.662	LOC100507346	0.775	ZNF227		CCR7	0.125	0	0	0.125
0.659	DNAJB5	0.627	NR2F1-AS1	0.662	VIMP	0.775	ZNF227		TBX1	0	0	0	0
0.659	MIR6068	0.627	NR2F1-AS1	0.662	VIMP	0.775	ZNF227		YWHAH	0	0	0	0
0.659	CEP131	0.626	SNORA45B	0.662	MXD1	0.775	ZNF227		UBA52	0	0	0	0.283
0.659	CEP131	0.626	LINC00521	0.662	MXD1	0.775	ZNF227		NFKBIA	0	0	0	0.527
0.658	NPPB	0.626	MIR4653	0.662	MXD1	0.775	ZNF227		ARRB2	0.046	0	0	0.058
0.658	OR51D1	0.626	OOSP1	0.662	2018-03-03	0.775	ZNF227		MFSD10	0	0	0.069	1.044
0.658	FAM13B	0.625	ZNF512	0.662	KRT25	0.775	OR6C2		KCNB1	0	0	0	0
0.658	FAM13B	0.625	ZNF512	0.661	AP1B1	0.774	YY1AP1		ACVR1	0	0.066	0	0.895
0.658	FAM13B	0.625	ZNF512	0.661	AP1B1	0.774	RNF213		JUN	0.06	0.09	0.041	0.163
0.658	MMP8	0.625	ZNF512	0.661	AP1B1	0.774	RNF213		CYCS	0	0	0	0
0.658	MMP8	0.625	ZNF512	0.661	WDFY1	0.774	CPEB4		VEGFA	0	0	0	0.366
0.658	MMP8	0.625	ZNF512	0.661	CNTD1	0.774	S100A13		HMGN5	0	0	0	0
0.658	TAF6L	0.625	PCBP2	0.661	LOC102467073	0.774	ASCC1		POLR2G	0.445	0.396	0.409	0.681
0.658	LAMA3	0.625	PCBP2	0.661	UGT1A7	0.774	SMCHD1		DIP2A	0	0	0	0
0.658	LAMA3	0.625	PCBP2	0.66	PDCD6	0.774	MAGEA9		RRP1B	0.479	0.478	0.255	0.283
0.658	LAMA3	0.625	PCBP2	0.66	PDCD6	0.774	C6orf52		ESPL1	0	0	0	0.39
0.658	LAMA3	0.625	PCBP2	0.66	PDCD6	0.774	C6orf52		INCA1	0	0	0	0
0.658	ST7-AS2	0.625	PCBP2	0.66	PDCD6	0.773	MAGEA9B		SMAD6	1.101	0.213	0.358	0.534
0.658	ST7-AS2	0.625	PCBP2	0.66	PDCD6	0.773	MIR23B		IRF3	0	0	0	0
0.657	FRMD4A	0.625	LOC101926940	0.66	PDCD6	0.773	WIF1		TGM5	0	0	0.087	0
0.657	EPB41L5	0.625	DGKZ	0.66	SORBS2	0.773	C12orf74		ITPR1	0.113	0	0	0
0.657	CEACAM4	0.625	DGKZ	0.66	SORBS2	0.773	C12orf74		IHH	0.134	0	0.028	0.106
0.657	BBOX1-AS1	0.625	DGKZ	0.66	C12orf74	0.773	YY1AP1		NQO1	0.157	0	0	0
0.657	ZNF35	0.625	DGKZ	0.66	C12orf74	0.773	YY1AP1		ARF6	0	0.21	0	0
0.656	ATXN3L	0.624	MIR1265	0.66	CRNKL1	0.773	YY1AP1		ZNF268	0	0	0	0
0.656	MIR181A2	0.624	MYO15A	0.66	COA3	0.773	FNDC4		BTG1	0.048	0	0	0.069
0.656	FAM183CP	0.624	HNRNPF	0.659	ZNF284	0.772	PKLR		DSC3	0.134	0	0	0.134
0.656	LOC100505666	0.624	FAM86EP	0.659	PITX2	0.772	TM4SF5		SEMA3A	0	0	0	0
0.655	CD248	0.624	KLF6	0.659	SDC1	0.772	EFNA4		KRT81	0	0	0	0
0.654	MIR3675	0.624	KLF6	0.659	CFAP61	0.772	EFNA4		KRT32	0	0	0	0.029
0.653	LOC100288911	0.624	KLF6	0.659	NHEJ1	0.772	EFNA4		COL18A1	0	0	0	0
0.653	PLIN3	0.624	KLF6	0.658	HRH1	0.772	VPS33A		HIC1	0.466	0	0	0.192
0.653	PLIN3	0.624	FAM86EP	0.658	TIMP4	0.772	C6orf52		KRT33B	0.121	0.121	0.121	0.167
0.653	PLIN3	0.624	FAM86EP	0.658	NFYC	0.771	HNRNPUL2-BSCL2		BUB1	0	0	0.019	0
0.653	TMEM88B	0.624	FAM86EP	0.658	MIR548AX	0.771	HNRNPUL2		IL6	0.483	0.336	0.439	0
0.653	ADAM15	0.623	CDH13	0.658	DRG1	0.771	BRAF		RPS27A	0	0.159	0.159	0
0.653	ADAM15	0.623	CDH13	0.658	LRRC8A	0.771	DAP3		BLCAP	0.025	0.041	0	0.209
0.653	ADAM15	0.623	CDH13	0.658	LRRC8A	0.771	DAP3		PKHD1	0	0	0	0
0.653	ADAM15	0.623	CDH13	0.658	TNRC6B	0.771	DAP3		TFPT	0	0	0	0
0.653	ADAM15	0.623	CDH13	0.658	LOC101927657	0.771	DAP3		CRYBA1	0.166	0.125	0.33	0.424
0.653	ADAM15	0.623	CDH13	0.657	CLDN14	0.771	DAP3		KPNA1	0.394	0.374	0.371	0
0.653	ADAM15	0.623	NEDD4L	0.657	EPB41L4A	0.771	MAVS		RIPK2	0.012	0.608	0.012	0
0.653	ADAM15	0.623	SNORD90	0.657	CCBL1	0.771	MAVS		EEF1E1	0.343	0.811	0.811	0.327
0.653	ADAM15	0.623	LOC101927641	0.657	CCBL1	0.771	MAVS		PRDX2	0	0	0	0
0.653	ADAM15	0.622	CASP5	0.657	CCBL1	0.771	ZNF587B		MAP3K7	0	0	0	0
0.653	ADAM15	0.622	CASP5	0.657	CCBL1	0.77	LOC102723766		PAX4	0	0	0	0
0.653	ADAM15	0.622	CASP5	0.657	CCBL1	0.77	LOC102723766		ARHGEF9	0	0	0	0
0.652	GRP	0.622	CASP5	0.657	PCSK9	0.77	MIR27B		PRAMEF1	0	0	0	0
0.652	GRP	0.622	CASP5	0.656	FAM86HP	0.77	F10-AS1		MELK	0	0.37	0	0.383
0.652	GRP	0.622	CASP5	0.656	MIR7850	0.77	ANO9		GNB1	0	0.023	0	0
0.652	ADPRHL1	0.622	LOC100652768	0.656	SDC1	0.77	YARS2		PIK3CB	0	0.144	0.144	0.144
0.652	MIR1279	0.622	ICK	0.656	TARBP1	0.769	ACTN3		PIK3CA	0	0	0	0
0.652	CLPTM1	0.622	ICK	0.656	AEBP1	0.769	ACTN3		AKR1C3	0	0	0	0
0.652	CAST	0.622	FAM83H-AS1	0.656	GPAM	0.769	TFAP4		KRT8	0	0	0.611	0
0.651	GSN-AS1	0.622	C5orf45	0.656	GPAM	0.769	S100A13		KRT18	0	0	0.204	0
0.651	ESR2	0.622	C5orf45	0.656	RMND5B	0.769	PAK1IP1		PRKCB	0.06	0.06	0	0
0.651	ESR2	0.622	SLC2A10	0.656	RMND5B	0.769	DAND5		PRAMEF17	0.146	0.015	0	0
0.651	CAST	0.621	HNRNPF	0.656	RMND5B	0.768	POLD2		PRAMEF20	0.335	0.035	0	0
0.651	CAST	0.621	HNRNPF	0.655	YPEL5	0.768	POLD2		DAPK3	0.554	0.552	0.553	0.553
0.65	TMEM171	0.621	RGS4	0.655	YPEL5	0.768	MIR3691		SART1	0	0	0	0.305
0.65	TMEM171	0.621	TUBA4B	0.655	YPEL5	0.768	TCTA		SIRT4	0.072	0	0	0.072
0.65	MIR4675	0.621	COTL1	0.655	YPEL5	0.767	POLD2		OMA1	0.907	0.552	0.528	0
0.65	TTC36	0.621	IL36RN	0.655	HPS4	0.767	MIR4295		LGALS12	0	0	0	0
0.65	B4GAT1	0.62	GCSH	0.655	HPS4	0.767	ONECUT3		SELENOK	0	0	0	0
0.649	PLCB4	0.62	GCSH	0.654	PTGIR	0.766	S100A13		QARS	0.426	0	0	0.455
0.649	LOC79999	0.62	SDC1	0.654	OSBP2	0.766	OLIG3		ALDH1A3	0	0	0	0
0.649	LOC388436	0.62	TMC5	0.654	STRC	0.766	LOC100505666		KRT79	0	0	0.036	0.25
0.649	CTXN3	0.62	TMC5	0.654	RAB3C	0.766	SNORA45B		GABRB2	0	0	0	0
0.649	USP9X	0.62	ZNF573	0.653	IL36A	0.766	GHRLOS		MAPK3	0.024	0.024	0	0.11
0.649	USP9X	0.62	ZNF573	0.653	NXF1	0.766	GHRLOS		MYB	0	0	0.147	0
0.649	EHF	0.62	ZNF573	0.653	NXF1	0.766	GHRLOS		RPS6KA3	0	0	0	0
0.649	EHF	0.62	ZNF573	0.653	ESR2	0.766	GHRLOS		YWHAQ	0	0.098	0.013	0.18
0.648	LINC01133	0.62	ZNF573	0.653	ESR2	0.766	GHRLOS		SNCB	0	0	0	0
0.648	PCDHA13	0.62	FKBP1A-SDCBP2	0.653	RSBN1L	0.766	GHRLOS		ST14	0.472	0.501	0.032	0.471
0.648	PCDHA13	0.62	FKBP1A	0.652	TMEM45A	0.766	NSFL1C		IER3IP1	0.167	0.532	0	0.168
0.648	SOX5	0.62	FKBP1A	0.652	NFYC-AS1	0.766	NSFL1C		NOX1	0	0	0	0
0.648	SOX5	0.62	FKBP1A	0.652	MIR554	0.766	NSFL1C		TNIP2	0	0	0	0
0.648	CHRND	0.62	HEG1	0.652	KLRG2	0.766	NSFL1C		FBXO18	0	0	0.412	0
0.648	CHRND	0.619	SDC1	0.652	MICAL2	0.765	MAP3K14-AS1		MEIS3	0	0	0	0.288
0.648	CHRND	0.619	AGXT2	0.652	MICAL2	0.765	MAP3K14-AS1		PHLDA3	0.485	0.193	0.479	0.044
0.648	CHRND	0.619	SALRNA1	0.652	URAD	0.765	MAP3K14-AS1		ZNF16	0	0	0	0
0.648	ANAPC11	0.619	CRIM1	0.651	LINC00670	0.765	TGDS		SLIT3	0.327	0.327	0.328	0.328
0.648	ANAPC11	0.619	ERRFI1	0.651	LINC00670	0.765	TGDS		MX1	0.04	0.04	0.04	0.04
0.648	ANAPC11	0.618	GPX4	0.651	ARHGAP32	0.765	TGDS		STAMBP	0	0.029	0	0.046
0.648	MORN4	0.618	AFAP1L2	0.65	MIR4649	0.765	TGDS		NTN1	0.042	0.042	0	0
0.648	LGALS3	0.618	AFAP1L2	0.65	ANKRD60	0.765	FKBP1AP1		DNAJB6	0.022	0	0	0
0.647	RBFOX2	0.618	AFAP1L2	0.65	TRPV6	0.765	RHOA		LRP5	0.042	0.042	0.042	0.15
0.647	RBFOX2	0.618	SUPT20H	0.65	TOMM40	0.765	LINC00708		FLCN	0	0.079	0.079	0
0.647	RNU6-53P	0.618	TUBA4A	0.65	TOMM40	0.765	S100A13		FGFR4	0.031	0	0.366	0.245
0.647	GPX4	0.618	FAM13B	0.65	TOMM40	0.764	PIDD1		EAF2	0	0	0.029	0
0.647	NUDT4	0.618	FAM13B	0.65	EPB41L4A-AS2	0.764	PIDD1		ARAF	0	0	0	0
0.647	NUDT4	0.618	FAM13B	0.65	DRGX	0.763	HMGN4		RB1	0	0	0.09	0
0.647	NUDT4	0.618	SUPT20H	0.649	CAMK2N2	0.763	CSRNP1		RXFP2	0	0	0.018	0
0.646	CHI3L1	0.618	SUPT20H	0.649	IRS2	0.763	MIR548K		CCR5	0	0.421	0.047	0.394
0.646	PALMD	0.618	SUPT20H	0.649	PPP1R35	0.763	ZNF709		STAT5B	0.082	0.368	0.096	0.319
0.646	PRSS23	0.618	SUPT20H	0.649	PIN1	0.763	KRTAP29-1		DDX42	0.025	0.025	0.025	0
0.646	PRSS23	0.618	PYGL	0.649	PIN1	0.762	ZNF570		CYR61	0	0	0.464	0
0.646	PRSS23	0.618	PYGL	0.649	PIN1	0.762	MIR24-1		SLC5A11	0.012	0	0	0
0.646	PRSS23	0.618	PIN4P1	0.649	LINC00363	0.762	WDR12		RASSF5	0.479	0.48	0.481	0.867
0.646	PRSS23	0.617	SLC38A6	0.648	MRPS35	0.762	CARF		CITED1	0.478	0	0	0.478
0.646	PRSS23	0.617	GLUD1P3	0.648	MRPS35	0.762	CARF		FOXC2	0.481	0.479	1.066	0.945
0.646	CLPTM1	0.617	LINC01151	0.648	ETV6	0.762	CARF		BAG1	0.064	0.11	0.065	0.326
0.646	AURKB	0.617	WDPCP	0.648	HNRNPF	0.762	CARF		BCL2L15	0	0	0.02	0
0.646	AURKB	0.617	WDPCP	0.648	PCSK7	0.762	CARF		PHIP	0	0	0	0
0.646	AURKB	0.617	LINC00167	0.648	MR1	0.762	RPN2		TWIST1	0	0	0.016	0
0.646	OR5P3	0.617	FAM45B	0.648	MR1	0.762	RPN2		RPS27L	0	0	0	0
0.645	PPP1R27	0.616	MIR198	0.648	MR1	0.761	MIR3074		MED1	0	0.046	0.299	0
0.645	MIR548AX	0.616	MLEC	0.648	MR1	0.761	KIAA0020		EPHA10	0.428	0.429	0.015	0
0.645	SNORD114-1	0.616	LOC100131303	0.648	EDEM2	0.761	FAM171A2		CKAP2	0	0	0	0
0.645	MSTN	0.616	SERBP1	0.648	EDEM2	0.761	DNTTIP2		TRADD	0.021	0.052	0.021	0.126
0.645	ZBTB7B	0.616	SERBP1	0.648	EDEM2	0.761	SIX2		CCK	0.085	0.085	0.085	0.086
0.645	ZBTB7B	0.616	SERBP1	0.647	RAB32	0.76	LRRN4CL		RET	0	0	0	0
0.645	ZBTB7B	0.616	SERBP1	0.647	NBPF3	0.76	OR52B6		CCL21	0	0	0	0
0.645	ZBTB7B	0.616	P4HA2	0.647	NBPF3	0.76	TLDC2		DDX3X	0	0	0	0
0.645	ZBTB7B	0.616	P4HA2	0.647	NBPF3	0.76	TLDC2		EBAG9	0	0.124	0	0
0.645	CA10	0.616	P4HA2	0.647	NBPF3	0.76	GSN		DLL1	0	0	0	0
0.644	ARID1A	0.616	TUBA4A	0.647	KLHL8	0.759	PKLR		CHL1	0	0	0.219	0
0.644	ARID1A	0.615	FOXL1	0.647	ZYG11B	0.759	SZT2		KRIT1	0	0	0	0
0.644	ZNF502	0.615	RTP3	0.646	LINC00518	0.759	TAPBP		APH1B	0	0	0.59	0
0.644	ZNF502	0.615	MIR6869	0.645	FAM222A-AS1	0.759	TAPBP		MYD88	0	0	0	0.492
0.644	ZNF502	0.615	FUT11	0.645	FAM222A-AS1	0.759	TAPBP		SMO	0.585	0	0	0.584
0.644	ZNF502	0.615	FUT11	0.645	RNF214	0.758	C1orf105		CIB1	0.56	0.56	0.013	0
0.644	ZNF502	0.614	PPP1CB	0.645	MSGN1	0.758	SNORA45A		TNFAIP8L1	0.078	0.047	0.078	0.126
0.644	COLEC10	0.614	SLC38A6	0.645	LMNB2	0.758	ZNF569		NKX3-1	0.018	0.018	0.018	0.806
0.643	RASGRP1	0.614	SLC38A6	0.645	MIR7641-2	0.758	MED8		ZFAND6	0.061	0.062	0.073	0.217
0.643	RASGRP1	0.614	SYT1	0.644	ARL14EPL	0.758	MED8		TWIST2	0	0	0	0
0.643	ANAPC11	0.614	PPP1CB	0.644	TBC1D15	0.758	MED8		CDSN	0	0	0	0
0.643	ANAPC11	0.614	SUPT20HL2	0.644	TBC1D15	0.757	S100A14		BMP2	0	0.184	0	0
0.643	ANAPC11	0.614	CAPN2	0.644	TBC1D15	0.757	NTSR1		NAA38	0.105	0	0.354	0.029
0.643	ANAPC11	0.613	TRMT5	0.644	TBC1D15	0.757	FOPNL		AES	0.087	0.015	0	0.544
0.643	ANAPC11	0.613	NKX1-2	0.644	LOC102659288	0.757	FOPNL		PML	0.247	0.028	0	0
0.643	ANAPC11	0.613	LOC100288748	0.644	LOC102659288	0.757	FOPNL		KRT72	0.451	0.121	0.328	0.194
0.643	ANAPC11	0.613	BMS1P4	0.644	MINPP1	0.757	FOPNL		PAK7	0	0	0	0
0.643	ANAPC11	0.613	MIR378A	0.643	LNPEP	0.757	FOPNL		PHLPP1	0.021	0	0.233	0
0.643	ANAPC11	0.612	FAM83H	0.643	OR13C3	0.757	FOPNL		KDM1A	0	0	0	0
0.643	ANAPC11	0.612	RGS4	0.643	CHI3L2	0.757	FOPNL		KIF1B	0	0	0	0
0.642	LINC00314	0.612	C11orf63	0.643	CHI3L2	0.757	FOPNL		MYBBP1A	0.144	0	0	0.128
0.642	CTPS1	0.612	C11orf63	0.643	MTO1	0.757	FOPNL		BCL7B	0	0	0	0
0.642	KLRC1	0.612	PRDM10	0.643	MTO1	0.757	PCIF1		SELENOS	0	0	0	0
0.642	KLRC1	0.612	PRDM10	0.643	MTO1	0.757	LOC100507065		ACTN3	0.501	0	0.248	0.769
0.641	DLC1	0.611	PCDHA11	0.643	LBX2	0.757	LOC100507065		SPIN2B	0	0	0	0
0.641	DLC1	0.611	PCDHA11	0.643	RNF214	0.757	LOC100507065		NOS3	0	0	0	0
0.641	PCDHA11	0.611	TGDS	0.643	RNF214	0.757	LOC100507065		TGM1	0	0	0	0
0.641	PCDHA11	0.611	TGDS	0.642	ATAD5	0.757	PPP1R3C		IL12B	0.145	0.067	0	0.065
0.641	ALYREF	0.611	TGDS	0.642	SLC39A12	0.756	ABR		LIG4	0.532	0.461	0.475	0
0.641	LINC00670	0.611	TGDS	0.642	SLC39A12	0.756	ZNF678		ST18	0	0	0	0
0.641	LINC00670	0.611	MIR4486	0.642	SLC39A12	0.756	ZNF678		PRKN	0	0	0	0
0.641	SNORD114-13	0.611	PAPSS2	0.642	SLC39A12	0.756	ZNF678		KLK8	0	0.039	0	0.17
0.64	SSC5D	0.611	PAPSS2	0.642	TAAR3	0.756	ACTN3		TNFSF8	0.418	0.418	0	0.306
0.64	SSC5D	0.611	MALAT1	0.641	BUB3	0.755	LOC100506790		CD70	0	0.271	0	0.374
[truncated: 20,560 more rows]

## Sheet: Figure 4-figure supplement 1K
Yap1		Tead1		Tead2		Tead4			GO:0006915	Yap1	Tead1	Tead2	Tead4
Beta Minus Score	Gene	Score	Gene	Beta Minus Score	Gene	Beta Minus Score	Gene		Hnf1b	1.759	0.758	0	1.066
6.892	A530032D15Rik	5.568	Gm9758	7.484	Mdm2	7.043	Speer4e		Ube2k	2.881	1.136	0	0.665
6.652	C130026I21Rik	4.968	Gm1979	7.484	Mdm2	6.667	Gm10354		Hsh2d	0	0	0	0
6.652	C130026I21Rik	4.943	Hjurp	7.372	Gm3383	6.46	Gm17019		Pdgfra	2.994	1.058	0	0.593
6.449	Sp110	4.941	A730008H23Rik	7.279	Gm4307	6.287	Speer8-ps1		Sycp2	0.546	0.014	0	0.172
6.132	Sp140	4.633	Malat1	7.279	Gm4303	6.082	Gm13242		Angptl4	1.887	2.011	0.276	1.422
6.092	Sp110	4.588	Speer4e	7.279	Gm4305	6.08	Gm13251		Ybx3	0	1.722	0	1.544
6.022	Hoxc9	4.574	Gm5862	7.279	Gm4302	5.8	Snord116l2		Fgf20	0	0	0	0
5.953	Igfbp2	4.514	Speer4d	7.193	Slc35e3	5.8	Snord116		Gramd4	1.176	1.374	0.161	1.04
5.709	Zmynd8	4.436	Snord116l2	7.19	Gm4302	5.8	Snord116l1		Cbl	0	0	0	0
5.694	Mir196a-2	4.436	Snord116	7.19	Gm4307	5.787	Gm13238		Ctnna1	1.418	0.792	0	1.966
5.679	Zmynd8	4.436	Snord116l1	7.19	Gm4303	5.694	Snord116l2		Cat	0.604	1.852	0	1.029
5.447	Wnt10a	4.434	6430706D22Rik	7.19	Gm4305	5.694	Snord116		Camk2b	0	0.372	0.162	0.711
5.419	Bahcc1	4.332	Prl2c3	7.135	Gm3383	5.694	Snord116l1		Camk2a	0.514	0.884	0	1.254
5.351	Nr1d1	4.331	Prl2c4	7.098	Gm4305	5.674	Gm13247		Anxa6	0.415	1.398	0	1.04
5.333	Zmynd8	4.281	4930572O03Rik	7.098	Gm4307	5.631	Gm9758		Gclm	1.749	0.718	0	3.177
5.333	Zmynd8	4.235	Snord116l2	7.098	Gm4303	5.511	Gm13152		Gclc	0	0	0	0
5.333	Zmynd8	4.235	Snord116	6.844	Nup107	5.428	Ifnz		S100a8	0.085	0.084	0	0.168
5.137	Sprr2a1	4.235	Snord116l1	6.622	Gm4301	5.425	Gm13247		C6	0.013	0	1.423	0
5.137	Sprr2a2	4.126	Speer8-ps1	6.622	Gm4312	5.367	Gm13276		C5ar1	0	1.161	0	1.14
5.06	Midn	3.904	Hist1h4d	6.607	Gm4307	5.356	Snord116l2		Tspo	1.562	1.153	0	0.316
4.979	Dos	3.884	Hist1h2bf	6.607	Gm4303	5.356	Snord116		Zc3hc1	0	1.793	0	1.402
4.976	Hoxc10	3.881	Hist1h2ad	6.607	Gm4305	5.356	Snord116l1		Btk	0	0	0	0
4.925	Atp5d	3.868	Hist1h3d	6.56	C130026I21Rik	5.325	Gm13272		Btg1	0.844	2.324	0.466	0.898
4.836	Dos	3.844	Loxl2	6.56	C130026I21Rik	5.325	Gm13285		Alx3	0.604	0.54	0	1.197
4.835	Kdm6b	3.817	Mir21a	6.321	Gm3383	5.303	Gm13285		Scin	0	0.228	0.175	0.076
4.802	Cldn6	3.802	Hist1h2bg	6.306	Gm10406	5.298	Gm13277		Tial1	0	0	0	1.189
4.786	Tnfrsf12a	3.773	Hist1h2ae	6.301	Gm3383	5.253	Gm13278		Stradb	0.933	1.057	0.52	1.404
4.786	Tnfrsf12a	3.745	Sp100	6.196	LOC100861615	5.244	Gm13279		Ptk2b	0.825	2.288	0.981	0.654
4.74	Pdlim2	3.74	Hist1h3e	6.05	Gm3383	5.234	Gm13285		Rock1	0.644	1.181	0	0.655
4.706	Pdlim2	3.73	Csf1	6.025	Gm4301	5.2	Snord37		Sqstm1	2.069	1.194	0	2.512
4.698	Klhl21	3.73	Csf1	6.025	Gm4312	5.19	9030025P20Rik		Lats2	2.164	1.277	0.509	1.716
4.675	Speer8-ps1	3.73	Csf1	6.015	A530032D15Rik	5.188	Gm3417		Ero1l	0.915	0.951	0.433	0.898
4.632	Cxxc5	3.667	Gm17019	5.821	Gm3383	5.188	Gm3448		Naca	0.921	1.737	0.2	1.529
4.625	Rara	3.664	Hist1h2be	5.808	Gm3383	5.184	Gm13275		Prdx2	0	0	0	0
4.607	C230035I16Rik	3.66	Hist1h1d	5.793	Cpm	5.182	Dapk3		Star	0	0	0	0
4.575	Gm3417	3.649	Hist1h2bj	5.616	Sp110	5.181	Dapk3		Six3	3.122	0	0	0.088
4.575	Gm3448	3.639	Epha2	5.607	Gm5796	5.167	Dapk3		Topaz1	0	0	0	0
4.575	Tcte3	3.637	Hist1h2ag	5.551	Sp140	5.114	Eef2		Stk3	0.891	0.497	1.032	0.605
4.575	Tcte3	3.605	Smad7	5.537	Sp110	5.089	Gm13279		Anxa5	0.996	2.255	0	2.105
4.573	Ermard	3.6	Hist1h4i	5.536	Gm3002	5.087	Gm13278		Ip6k2	0	0	0	0
4.563	Hoxb2	3.577	Nfic	5.396	Gm10409	5.079	Gm13285		Naif1	0.972	1.784	0	1.428
4.557	Nek8	3.577	Nfic	5.396	Gm3020	5.023	4930572O03Rik		Lgals7	0	0.748	0	0.443
4.555	Hoxc8	3.554	Gm14446	5.295	Gm6763	5.002	Gm13285		Ager	2.854	1.098	0.475	2.879
4.554	Wnt6	3.547	Mcl1	5.295	Gm20765	4.996	Zfp534		Spop	1.488	2.348	1.364	1.367
4.55	Pou3f1	3.511	Cd47	5.295	Gm21312	4.983	Gm13290		Stx4a	0	0	0	0.995
4.534	Thoc6	3.506	Cytip	5.295	Gm21293	4.983	Gm13289		Plscr1	0	0	0	0
4.52	Mir7653	3.501	Gm21671	5.295	Gm8764	4.935	Neat1		St18	0.06	0.102	0.306	0.028
4.518	Tlcd1	3.497	5031410I06Rik	5.295	Gm21304	4.93	Gm13275		Retreg1	0	0	0	0
4.518	Tlcd1	3.494	2310001H17Rik	5.264	4933411E08Rik	4.92	Gpx4		Crh	1.364	0	0	0.791
4.517	Tlcd1	3.484	Myadm	5.242	Gm10409	4.9	Gpx4		Creb1	0.618	1.239	0.507	0.61
4.517	Tlcd1	3.484	Myadm	5.242	Gm3020	4.897	Cd244		Ruvbl1	0	0.734	0	0.318
4.509	Hcfc1r1	3.483	Hist1h4f	5.228	Gm21312	4.896	Snord116l2		Comp	0	0	0	0
4.477	Otx1	3.461	Myadm	5.228	Gm6763	4.896	Snord116		Prkra	0.672	0.077	0	0.689
4.469	Snord42a	3.46	Ccl9	5.228	Gm4340	4.896	Snord116l1		Rbck1	1.408	0.091	0	1.385
4.467	Snord4a	3.448	Snord116l2	5.228	Gm20765	4.862	Gm13287		Col2a1	1.396	0.674	0.028	0.678
4.466	Socs3	3.448	Snord116	5.228	Gm8764	4.862	Gm13285		Col18a1	3.007	1.357	0.372	0.696
4.463	Hmg20b	3.448	Snord116l1	5.228	Gm21293	4.846	Zmynd8		Rnf216	0.988	0.236	0	1.176
4.463	Hmg20b	3.441	2310001H17Rik	5.228	Gm21304	4.846	Zmynd8		Clu	0.819	1.231	0.676	0.6
4.461	Hmg20b	3.441	2310001H17Rik	5.138	Gm3317	4.846	Zmynd8		Fgf10	0.432	0.103	0	0.87
4.41	Wnt10b	3.425	E230016K23Rik	5.138	Gm3488	4.81	Zmynd8		Hip1	1.221	1.075	0	0.707
4.406	Ahnak	3.425	E230016K23Rik	4.907	Gm3317	4.746	Zmynd8		Inca1	1.098	1.452	0.319	1.056
4.406	Ahnak	3.413	Aebp1	4.907	Gm3488	4.701	Gm3435		Eif2s1	0.731	1.069	0.03	0.721
4.406	Ahnak	3.413	Aebp1	4.571	Gm3317	4.686	Gm3417		Pak3	0	0	0	0
4.406	Ahnak	3.409	Hist1h2ah	4.571	Gm3488	4.686	Gm3448		Ogt	0	0	0	0
4.392	Zfp36l1	3.405	Hist1h2bk	4.55	Gm10409	4.657	Gm13285		Wdr92	0.016	0.614	0.411	0.324
4.387	Snord42b	3.4	Hspa1b	4.55	Gm3020	4.636	Gm13290		Dlg5	0.617	0.687	0.047	0.139
4.382	Per1	3.386	Gm13247	4.526	Gm21312	4.636	Gm13289		Tek	0.738	0.066	0	2.59
4.369	Cbx8	3.369	Mir7671	4.526	Gm6763	4.623	Gm7609		Ppm1f	1.051	1.09	0.074	1.268
4.364	Itln1	3.368	Gm15408	4.526	Gm20765	4.599	Speer4d		Tdgf1	0	0	0	0
4.334	Rpl23a	3.359	Slc25a37	4.526	Gm21304	4.579	Hist1h2af		Cxcr3	0	0	0	0
4.329	Mir135b	3.357	Tpst2	4.526	Gm21293	4.572	Cxxc5		Birc7	0.706	0.957	0	1.956
4.325	Asic4	3.351	Sprr2a1	4.526	Gm8764	4.561	Hist1h3g		Ddit4	2.156	0.295	0.499	1.663
4.323	Ubc	3.351	Sprr2a2	4.526	Sfi1	4.546	1700095A21Rik		Hcar2	0.022	0.368	0	0.253
4.312	Irf2bpl	3.333	Myadm	4.441	Il22	4.54	H2-Q7		Eif5a	3.756	1.535	0.058	2.638
4.31	Glis2	3.324	Gm14446	4.43	Pisd-ps3	4.54	H2-Q7		Sphk2	0	2.897	0	2.41
4.309	Hoxb3	3.317	Gm10471	4.428	Pisd-ps1	4.54	H2-Q7		Nop53	0	0	0	0
4.304	Traf4	3.281	Elk4	4.42	Rap1b	4.538	H2-Q9		Ripk2	1.046	1.565	0	0.482
4.265	Tubb5	3.258	Speer4a	4.362	Gm3264	4.523	Gm3500		Hells	1.121	0.02	0	0.025
4.255	Malat1	3.258	Gm13152	4.275	Gm6763	4.481	Hist1h4h		Htra2	0	1.564	0	1.265
4.25	Gm11627	3.223	Gm16677	4.275	Gm4340	4.467	Bcl6b		Cftr	0	0	0	0
4.25	Gm13277	3.223	Entpd4	4.275	Gm20765	4.42	Gpx4		F3	1.138	1.566	0	0.871
4.247	Per1	3.218	Pnrc2	4.275	Gm21312	4.363	Hspg2		Pkn2	0.604	0.843	0	0.596
4.246	Espn	3.207	Aff1	4.275	Gm21304	4.352	2610305D13Rik		Mtor	1.049	0.415	0	1.205
4.242	Nes	3.182	Aff1	4.275	Gm8764	4.348	Traf4		Dkk1	1.079	0.066	0	0.345
4.24	Gm13276	3.178	Dbp	4.275	Gm21293	4.342	Spns2		Zfp819	0	0.384	0	0.491
4.234	Gm13285	3.167	1500015L24Rik	4.23	Gm3264	4.332	Gm13287		Trpm7	0.643	0.629	0	0.977
4.232	Cldn9	3.163	Id3	4.109	Vmn2r83	4.332	Gm13285		Dhodh	0	0	0	0
4.229	Cd244	3.132	Endou	4.064	Speer5-ps1	4.276	Nek8		Card11	0.013	0.263	0	0
4.228	Hoxc6	3.121	Hist1h3f	3.97	Gm3383	4.276	Bahcc1		Pou4f2	0	0	0	0
4.226	Ahdc1	3.112	Snord116l2	3.894	Gm5795	4.261	Gm13139		Atf4	2.025	1.901	0	1.898
4.218	Rarg	3.112	Snord116	3.893	Gm10413	4.259	Igf2bp1		Dnase2a	0	0	0	0
4.213	Mir3083	3.112	Snord116l1	3.879	LOC100861615	4.248	Malat1		Gzmg	0.033	0	0.936	0
4.208	Hes7	3.112	Anxa1	3.656	Mdm1	4.222	Pias4		Ypel3	0	0	0	2.011
4.203	Ddr1	3.111	Lif	3.656	Mdm1	4.22	Arid3a		Pdcd6	0.643	0.814	0.536	0.728
4.203	Ddr1	3.107	Gm13546	3.656	Mdm1	4.22	Arid3a		Psen2	1.83	1.782	0.192	2.772
4.193	Reep3	3.107	Gm13546	3.656	Mdm1	4.218	Pnpla2		App	1.619	0.141	0	0.604
4.193	Reep3	3.093	B4galt5	3.611	Gm10377	4.218	Pnpla2		Apoh	0.058	0.332	1.127	0.266
4.19	Tnfrsf25	3.086	Hist1h2bh	3.576	Gm3696	4.218	Pnpla2		Apoe	0	0.436	0	2.297
4.184	Hspg2	3.066	Gngt2	3.563	Gm4981	4.206	Arid3a		Pea15a	3.387	0.886	0.242	1.61
4.183	Gm13279	3.065	Abi3	3.536	Gm3558	4.162	Tlcd1		Tnf	2.077	1.783	0.319	1.216
4.182	Fbxo44	3.065	Abi3	3.517	Gm5795	4.162	Tlcd1		Lta	1.939	1.883	0.392	1.288
4.182	Fbxo44	3.062	Gngt2	3.517	Gm10413	4.136	Tlcd1		Aplp1	0	0.273	0	0.469
4.182	Fbxo44	3.062	Gngt2	3.463	Ifng	4.136	Tlcd1		Apex1	1.719	1.589	0.772	1.542
4.182	Tnfrsf25	3.045	Pisd-ps1	3.392	Dyrk2	4.129	Mir7653		Apc	0.635	0.887	0	0.696
4.18	Gm13278	3.044	Pisd-ps3	3.358	Dux	4.12	Kiss1r		Prkdc	0.597	0.968	1.138	0.422
4.179	4930578M01Rik	3.036	Neat1	3.315	4930533P14Rik	4.117	Myh9		Erbb4	1.297	0	0.122	0.521
4.178	Ifnz	3.025	Gngt2	3.308	Eif4enif1	4.115	R3hdm4		Ephb3	1.405	0.367	0	1.663
4.178	Mfsd12	3.014	Paqr4	3.257	Eif4enif1	4.114	Atcayos		Traf4	4.304	2.54	0.282	4.348
4.174	Plxnb2	3.013	Arhgap35	3.256	Gm4301	4.107	Mir1905		Ephb4	2.706	1.157	0	1.675
4.171	Fbxo44	3.003	Sys1	3.256	Gm4312	4.102	Mir8093		Sik1	0.978	1.217	0.167	1.236
4.171	Gm13285	2.999	Otud7b	3.254	Gm5458	4.098	Itln1		Osm	0.789	1.272	0.014	0.687
4.168	Fbxo44	2.999	Otud7b	3.242	Gm3500	4.048	Speer4c		Peg3	0	0	0	0.616
4.167	Stk11	2.996	Hspa1a	3.235	Gm3500	4.047	BC018473		Adarb1	0.884	1.503	0.84	0.996
4.167	Stk11	2.991	Dot1l	3.198	Gm10413	4.026	Snord65		Cdkn2a	1.434	0.161	0	1.378
4.167	Stk11	2.977	Foxc1	3.169	Eif4enif1	4.015	Cuedc1		43347	3.318	0.778	0.122	1.802
4.167	Stk11	2.97	Ak1	3.164	Eif4enif1	4.013	Plec		Fam3b	0.054	0	0	0
4.157	Gm3435	2.966	Lasp1	3.1	Esp3	4.013	Plec		Atn1	0	2.555	0	1.492
4.154	Uck2	2.961	Tnrc18	3.016	Gm10375	4.013	Mcl1		Dnaja1	1.465	0.993	0	0.809
4.154	Gm3417	2.961	Tnrc18	2.997	Mcpt4	4.01	Cracr2b		Shh	1.084	0	0	0
4.154	Gm3448	2.959	Gm10354	2.994	Rpl24	3.999	Hist1h2bh		Shb	1.213	0.606	0	1.165
4.15	Fbxo2	2.947	Zfp608	2.872	Pisd-ps2	3.993	Sh2b3		Spi1	0.49	1.182	0	1.511
4.148	Fbxo6	2.936	Eef2	2.87	Gm5797	3.99	H2-Q6		Clcf1	1.32	2.035	0	3.238
4.147	Fbxo6	2.929	Gm13247	2.841	Naip7	3.99	H2-Q8		Sell	0.032	2.368	0.031	0.037
4.147	Fbxo6	2.918	Pkmyt1	2.795	Naip6	3.969	Hspa5		Epha4	1.623	0.616	0.039	1.209
4.147	Fbxo6	2.917	2310047M10Rik	2.786	Vmn2r116	3.969	Hspa5		Nox4	0	0	0	0.522
4.146	Lama5	2.916	Hspa1l	2.777	Iltifb	3.955	Hist1h3f		Ccl5	0.239	1.453	0.644	0.238
4.145	Hsp90ab1	2.912	Irf1	2.764	Gm3500	3.937	Lasp1		Ccl3	0	0.146	0.09	0.37
4.144	Fbxo6	2.912	Irf1	2.718	Gm10377	3.937	Mex3a		Prok2	0	0.31	0	0
4.135	Sfn	2.898	Hnrnpu	2.675	Hist1h4n	3.927	Brms1		Scp2	0.118	0.013	0	0.695
4.117	Gipc3	2.897	Sphk2	2.673	Olfr138	3.923	Mir1191b		Ppargc1a	0	0.327	0	0.342
4.111	Gm13272	2.893	Zfp36l1	2.67	Hist1h4m	3.921	Gm13154		Slc9a3r1	2.893	1.969	0.126	1.152
4.111	Gm13285	2.889	3300005D01Rik	2.648	Olfr117	3.907	Mafk		Rxra	1.258	1.156	0	0.985
4.103	Gbx2	2.889	3300005D01Rik	2.607	Vmn2r87	3.898	Plec		Smndc1	1.171	1.457	0	1.45
4.09	Plcxd1	2.889	Snord37	2.57	LOC100861615	3.898	Plec		Serinc3	0.833	1.428	0	1.902
4.074	Gm13275	2.885	Snord83b	2.568	Gm2897	3.887	Phospho1		Cln8	0	0	0	0
4.062	Myh9	2.882	Cnn2	2.564	4930555G01Rik	3.881	Snord42a		Tmem102	1.808	0.894	0.026	1.664
4.055	Ddr1	2.88	Myh9	2.555	Dopey2	3.877	Snord49a		Ern2	0	0	0	0.174
4.05	Atf3	2.87	Mef2d	2.555	Dopey2	3.863	Mir5121		Foxl2	0	0	0	0
4.045	Slc35b2	2.87	Mir6546	2.553	1700001F09Rik	3.862	Snord33		Aifm1	0	0	0	0
4.036	Aloxe3	2.869	Sh3gl1	2.548	Nlrp1b	3.86	Plec		Cops5	1.164	0.539	0.013	0.629
4.035	Vamp2	2.869	Sh3gl1	2.532	Vmn1r215	3.86	Snord34		Hrk	1.694	0	0	0.857
4.035	Gadd45b	2.868	3300005D01Rik	2.529	Abracl	3.859	Snord35a		Prop1	0.213	0	0.023	0.246
4.032	Plcxd1	2.866	Tbc1d10a	2.518	Hist1h2ap	3.857	Mir497		Dapk1	1.079	0	0.142	0.02
4.032	Wnt1	2.865	Ak1	2.507	Hist1h2ao	3.854	Snord4a		Prune2	0.599	1.085	0	1.054
4.027	Lasp1	2.863	Gm13251	2.504	Olfr178	3.85	Phf10		Aven	0.941	0.611	0	0.638
4.023	Llgl2	2.862	Ifit3	2.49	Hist1h2bq	3.841	Snord32a		Dab2ip	1.615	1.119	0	1.425
4.023	Llgl2	2.857	Slc48a1	2.49	Hist1h2br	3.84	Mir497b		Cyld	0	0	0	0
4.022	Ajuba	2.854	Tmpo	2.47	Vmn2r115	3.834	Spns2		Cdc34	2.842	2.119	0.326	2.94
4.02	Ccin	2.852	Sdc4	2.445	C230029M16	3.821	Snord116l2		Esr2	2.075	0.575	1.004	0.902
4.019	Crb2	2.85	Kpna2	2.412	Cd200r3	3.821	Snord116		Col4a3	0	0.262	0.729	0.461
4.015	Rtn4rl1	2.844	Chsy1	2.412	Cd200r3	3.821	Snord116l1		Twist2	0.891	0.103	0.096	0.977
4.013	Ccnd3	2.843	Ptk2	2.412	Cd200r3	3.819	Gadd45g		Fnta	0	0	0	0
4.013	Ccnd3	2.843	Ptk2	2.412	Cd200r3	3.811	Fpgs		Tfap2b	1.738	0.539	0.287	0.54
4.012	Phf13	2.84	Aurkb	2.396	Impg2	3.803	Mir195a		Tfap2a	2.886	0	0.021	1.115
4.007	Tagln2	2.838	E330020D12Rik	2.382	Vmn2r82	3.799	Snord49b		Lep	0	0.443	0	0.243
4.006	2610305D13Rik	2.835	Tspan14	2.372	Vmn2r117	3.798	Cd151		Ckap2	0	0	0	0
3.997	4930404N11Rik	2.835	Kif5b	2.357	Olfr745	3.798	Cd151		Rnf144b	1.239	0.219	0	0.863
3.996	Ccrn4l	2.832	Irf1	2.34	Olfr170	3.794	Iffo1		Dll1	0.906	1.483	0	0.163
3.993	Rps10	2.832	Zfp52	2.337	Olfr248	3.794	Iffo1		Atoh1	0	0	0	0
3.987	Ckb	2.831	Fbxl14	2.321	Olfr746	3.794	Iffo1		Pdcd2	1.256	0.909	0.176	0.829
3.97	Abt1	2.83	Fads1	2.307	Vnn3	3.794	Iffo1		Tgfbr3	2.256	0.589	0	1.542
3.969	Tnrc18	2.824	Tnfrsf9	2.303	Nlrp1b	3.794	Iffo1		Tle1	1.251	0.165	0	0.603
3.969	Tnrc18	2.824	Tnfrsf9	2.284	Agxt2	3.792	Snord42b		Pmaip1	2.331	1.082	0	0
3.969	Smad7	2.822	Igll1	2.277	Adra1a	3.787	Plec		Dstyk	0.706	0.73	0	1.217
3.968	Hoxc5	2.821	Tmpo	2.277	Adra1a	3.786	Plec		Cnr1	0.611	0.06	0	0
3.966	Six1	2.821	Tmpo	2.277	Adra1a	3.786	Plec		Unc5d	0	0	0	0
3.964	Rab34	2.821	Tmpo	2.277	Adra1a	3.782	Gm13283		Rps6	1.201	1.056	0	0.87
3.962	Hist1h4h	2.821	Tmpo	2.275	Vmn2r97	3.781	Rpl23a		Casp8ap2	0.768	0.829	0	0.739
3.961	Espn	2.821	Tmpo	2.266	LOC100861615	3.78	Plec		Mif	2.464	1.469	0.012	1.46
3.961	Espn	2.814	Tmem107	2.26	Mir8099-2	3.78	B4gat1		Mgmt	0	0	0	0
3.961	Espn	2.814	Tmem107	2.26	Mir8099-1	3.779	Plec		Kitl	0.087	0.035	0.371	0
3.961	Espn	2.809	Ywhaz	2.237	Emr4	3.777	Gm13288		Met	0	0.712	0	0.283
3.961	Plxnb2	2.8	Ppp1r18	2.227	Ang4	3.773	Sprr2a1		Mertk	1.185	1.417	0	1.173
3.961	Plxnb2	2.799	Gm7609	2.221	Fut8	3.773	Sprr2a2		Stk40	1.684	0.505	0	2.18
3.958	Hoxd10	2.796	Ak1	2.219	Olfr176	3.769	Rpl13a		Mdm2	2.422	2.244	7.484	2.038
3.957	Gm13285	2.795	Adk	2.219	Olfr177	3.767	Jup		Zdhhc16	1.05	1.064	0	1.58
3.954	Gm13290	2.79	Atad1	2.213	Gcc2	3.766	Capn2		Mdk	2.36	0.283	0	1.311
3.954	Gm13289	2.789	Polg2	2.205	Boll	3.758	2410006H16Rik		Gsdma3	0.07	0.027	0.537	0.231
3.948	Rab34	2.788	Pten	2.195	Esp4	3.74	Rps11		Aimp1	0.693	0.59	0	0.154
3.948	Nodal	2.788	Glipr1	2.178	Gm20257	3.722	Gip		Ascl1	1.168	0	0.421	1.001
3.948	Snord37	2.788	Polg2	2.174	Cbr3	3.716	Cd151		Mag	0	0.415	0	0.021
3.924	Map7d1	2.784	Notch1	2.168	Spag6	3.715	1700001P01Rik		Six1	3.966	0.99	0.241	0.34
3.924	Map7d1	2.783	Hist1h2ab	2.158	E330017A01Rik	3.709	Rbms1		Aim2	0.101	0.73	0.199	0
3.921	Irf1	2.777	Mir6950	2.144	Olfr1355	3.709	Rbms1		Cdkn1b	0	1.549	0	2.047
3.921	Irf1	2.774	Hist1h3b	2.14	Actl9	3.701	Gm3417		Rps6ka1	1.895	0.901	0	1.078
3.92	Dapk3	2.767	F2r	2.139	Boll	3.701	Gm3448		Rps6ka3	0	0	0	0
3.918	Dapk3	2.763	Sf1	2.13	Ear14	3.701	Tcte3		Cdkn1a	2.669	2.135	0.718	1.531
3.915	Irf1	2.763	Sf1	2.129	Ear4	3.701	Tcte3		Mitf	0	0.749	0	0.615
3.91	Hist1h2af	2.763	Sf1	2.118	Tex14	3.697	Smad7		Brca1	1.53	1.097	0.238	1.412
3.905	H2-Q8	2.759	Pik3cd	2.085	Sp100	3.696	Ermard		Bmp8a	1.025	0.03	0	1.136
3.905	H2-Q6	2.758	Slc35b2	2.07	Vps4b	3.692	Lin7b		Nqo2	0.121	1.012	0.941	0.624
3.901	Gm13278	2.758	Cirbp	2.047	1810014B01Rik	3.691	Btg2		Tnfrsf4	0.275	0.136	0	0.752
3.894	Ddr1	2.751	Mir1191b	2.044	4930512M02Rik	3.685	Plec		Tnfsf4	0.503	0.966	0.037	0.171
3.89	Dapk3	2.746	Os9	2.039	Gm10408	3.676	Gm13290		Sarm1	1.373	0.78	0.127	1.401
3.887	Jup	2.746	Os9	2.035	Cd200r2	3.676	Gm13289		Mir20b	0	0	0	0
3.879	Hes1	2.738	4833419F23Rik	2.019	Kcne4	3.675	Chd3os		Mir19a	1.403	0.624	0	1.388
3.875	Gm13279	2.734	Hexim1	2.015	Gm7609	3.665	Polr2e		Mir124a-2	0.569	0	0	0
3.861	Speer4e	2.734	Ppp1r18	2.013	Olfr1354	3.664	Itgb6		Dock8	0.629	1.297	0	0.422
3.858	Mir615	2.734	Vpreb1	2.01	Gm10324	3.64	Mir126b		Opa1	0.606	1.072	0.701	0
3.856	Gm13285	2.725	Rara	2.005	4930519F09Rik	3.636	Mir126a		Rapgef3	1.748	2.523	0.759	2.672
3.852	Hoxb1	2.724	Phlda3	2.001	Prl8a9	3.635	Gm13285		Prdx5	1.125	2.192	0	1.581
3.846	Hist1h3g	2.723	Rara	1.969	Rhobtb3	3.633	Slc16a13		Lyn	0.569	0.835	0	1.255
3.843	Gm16880	2.719	Midn	1.959	Vmn1r205	3.63	Egfl7		Mtfp1	1.893	0.25	0.017	1.632
3.839	Snord83b	2.715	Mir3064	1.956	Cma2	3.627	Tubb5		Ltk	0.344	0.958	0	0.386
3.838	Mir7671	2.71	Map3k8	1.954	Ripk3	3.613	Myl6		Pdx1	1.387	0.29	0	0.249
3.835	Camk2n1	2.709	Pik3cd	1.954	Ripk3	3.605	Efna4		Lsp1	0	0	0	2.703
3.833	Tbx3	2.709	Pik3cd	1.954	Ripk3	3.601	Snora52		Lrp1	1.776	1.326	0.517	1.821
3.831	Mir130a	2.709	Pik3cd	1.947	Drd3	3.594	Sh3tc1		Tlr4	0	1.252	0	0.555
3.824	Gm19705	2.706	Ak1	1.94	Olfr777	3.592	Hist1h4f		Anxa1	1.039	3.112	0	1.257
3.817	Myc	2.701	9930111J21Rik2	1.939	Kif4-ps	3.588	Egfl7		Cacna1a	0	0	0	0
3.817	Myc	2.7	9930111J21Rik1	1.924	Olfr773	3.588	Egfl7		Fmn2	1.315	0.047	0.108	0.064
3.817	Myc	2.696	I830012O16Rik	1.903	Olfr815	3.587	Lix1l		Nod2	0	0	0	0
3.817	Myc	2.695	Snord104	1.902	Gm17026	3.58	Gm13034		Pcnt	0.833	1.315	0.029	2.299
3.816	Gm19705	2.69	Uhrf1bp1l	1.888	Vmn2r89	3.577	Polg2		Ednrb	0.593	0	0.224	1.066
3.815	Lemd1	2.686	Trim8	1.888	Vmn2r89	3.577	Snord35b		Cav1	0	0.593	0	0.898
3.808	Gm13154	2.684	Cers2	1.888	Vmn2r89	3.577	Polg2		Pih1d1	0	1.763	0	2.003
3.799	Hoxc11	2.681	Dapk3	1.887	H2afv	3.566	Actb		Faf1	0.86	1.341	0	1.243
3.794	Dph1	2.676	Ppp1r18	1.887	Olfr1385	3.566	Tuba1b		Pdcl3	1.49	1.765	0.324	0.777
3.793	Tbx3	2.674	Sphk2	1.886	Dnah7b	3.563	Zfp36		Il7r	0	0.979	0.739	0.403
3.792	Ccdc64b	2.674	Sphk2	1.883	Ctse	3.562	Rara		Hsp90ab1	4.145	2.436	0	2.431
3.781	Tmem107	2.671	4930556M19Rik	1.881	Ifi35	3.561	Rara		Hspd1	2.747	0.677	0.639	1.087
3.781	Tmem107	2.671	4930556M19Rik	1.875	1700064J06Rik	3.555	Trmt61a		Hspb1	3.399	1.349	0	2.44
3.778	Hoxd11	2.671	4930556M19Rik	1.874	Mir6388	3.555	Trmt61a		G2e3	1.176	0.658	0.205	0.661
3.77	Gtpbp6	2.664	Rpl18	1.872	Olfr205	3.555	Trmt61a		Hsf1	0.918	1.486	0	2.335
3.769	Nuak2	2.663	Cd93	1.871	Olfr175-ps1	3.55	Ubtf		Tnfaip3	0.828	1.42	0.095	1.183
3.769	Nuak2	2.662	Nedd9	1.868	Tbpl1	3.543	Ankrd34a		Foxc2	0	0	0	0
3.763	Mdc1	2.657	Syk	1.862	Mrpl32	3.541	Rplp2		Hras	0	0	0	1.613
3.756	Eif5a	2.657	Tcf19	1.858	Spidr	3.537	Ckb		Foxa1	1.422	0.047	0	0.505
3.754	Eif5a	2.657	Tcf19	1.856	Slc30a8	3.529	Spen		Foxc1	2	2.977	0.62	0.594
3.754	Eif5a	2.657	Tcf19	1.849	Psma2	3.528	Mir3064		Hyal2	0	0	0	0
3.754	Eif5a	2.656	Dapk3	1.845	Vmn1r-ps103	3.522	Hnrnpab		Anp32b	1.115	1.053	0	1.821
3.753	Eif5a	2.655	Rai14	1.843	Serpinb3d	3.522	Hnrnpab		Ern1	1.571	1.952	0.057	2.137
3.747	Eef2	2.655	Skida1	1.84	Olfr31	3.515	Rab34		4930453N24Rik	0.604	0.842	0.233	0.724
3.747	Gm13285	2.652	Hnrnpa2b1	1.838	Ly6c1	3.514	Rab34		Akt1s1	0	1.58	0	2.513
3.746	Trim8	2.652	Hnrnpa2b1	1.829	Gm6904	3.513	Rin1		Dusp6	2.756	1.719	0.063	3.078
3.745	Eif5a	2.652	Hnrnpa2b1	1.829	Rpl38	3.513	Hist1h1d		Itprip	0.879	1.613	0	0.759
3.745	Eif5a	2.65	Chst3	1.829	Rpl38	3.511	Tspan4		Rnf41	1.216	1.23	0.729	1.688
3.745	Eif5a	2.648	Cchcr1	1.829	Tmevpg1	3.511	Gnb2l1		Pml	0	0	0	0
3.739	Gm13290	2.642	Coro1b	1.828	Serpina1c	3.508	Polr2l		Pip	0	0	0	0
3.739	Gm13289	2.642	Rn4.5s	1.824	Olfr209	3.505	Hist1h3b		Ptprf	1.54	0.313	0	0.616
3.729	Nfkbie	2.641	Pim1	1.824	Olfr208	3.501	Mtx1		Cpeb4	0.62	0.627	0.025	0.831
3.729	Nfkbie	2.64	Ebf1	1.824	Olfr207	3.501	Mtx1		Bcap31	0	0	0	0
3.728	Mex3a	2.64	Ebf1	1.821	Ly6c1	3.501	Slc38a1		Bcl2a1a	0	0	0	0
3.717	Snord43	2.64	Ebf1	1.821	Ly6c1	3.496	Hist1h2ab		Asns	0	0.177	0	0.491
3.707	Myl6	2.64	Ebf1	1.821	Ly6c1	3.495	Frs2		Irf5	0	0.953	0	0.53
3.706	Rpl3	2.639	Thrap3	1.821	Ly6c1	3.486	Tmem107		Lhx3	1.329	0.354	0	0.059
3.701	Espn	2.637	Ptprcap	1.818	Gm4846	3.486	Tmem107		Runx3	0.257	0.921	0	0.648
3.699	Mir6347	2.631	Gm3417	1.815	Cnih1	3.481	Rara		Pdcd7	0	0	0	0
3.697	Eif5a	2.631	Gm3448	1.814	Dgka	3.478	Hist1h3e		Atf3	4.05	1.67	0.035	2.594
3.697	9930012K11Rik	2.63	Hist1h3i	1.808	Il20	3.478	Tspan4		Casp7	0.761	0.122	0	0.264
3.697	9930012K11Rik	2.627	9030025P20Rik	1.808	Rpl38	3.476	Slc38a1		Pla2g6	1.594	1.815	0.369	3.088
3.695	Flot1	2.626	Arl5c	1.806	Adam6b	3.476	Msh5		Epha8	1.061	0.064	0	0.581
3.694	Zfp532	2.625	Ccl2	1.803	Rpl27	3.475	Afmid		Ing2	0	0	0	0
3.693	Cirbp	2.623	Ywhaz	1.801	H60c	3.475	Tk1		Syngap1	3.215	1.395	0.232	2.683
3.691	Tmem88	2.623	Ywhaz	1.799	Hace1	3.475	Tk1		Krt8	3.384	0.804	0.022	2.989
3.691	Arid3a	2.622	Vcl	1.797	Olfr744	3.473	Msh5		Trpv2	1.231	0.918	0.064	1.016
3.691	Arid3a	2.621	Polk	1.796	Gm5800	3.473	Msh5		Zfp385b	1.18	0.014	0	0.094
3.69	Fgf18	2.618	Hist1h2ai	1.795	Idi1	3.473	Msh5		Clca3a2	0.431	0.13	0	0.186
3.69	Fgf18	2.615	Hist1h2bl	1.788	Olfr118	3.467	Ubtf		Selenok	0	0	0	0
3.686	Cyr61	2.614	Rn4.5s	1.78	Olfr180	3.467	Ubtf		Pycard	0	0	0	3.017
3.683	Epha2	2.613	Speer4c	1.776	Vmn1r201	3.467	Ubtf		Nog	1.408	0	0.027	1.582
3.681	Arid3a	2.607	Rnf151	1.77	Gzmf	3.464	Egfl7		Pglyrp1	0	0.095	0	0.148
3.68	9130024F11Rik	2.606	Cdc42ep1	1.765	1700100I10Rik	3.463	Cirbp		Rassf3	2.276	1.487	0.465	2.874
3.68	9130024F11Rik	2.606	Matr3	1.765	1700100I10Rik	3.463	Ptrf		Apip	0.583	0.233	0	0.593
3.68	Dnmt3b	2.605	Col4a3bp	1.765	1700100I10Rik	3.458	Thbs3		Mfsd10	0.709	0.739	0	0.889
3.68	Dnmt3b	2.605	Col4a3bp	1.765	1700100I10Rik	3.454	Lgals1		Moap1	2.155	0.825	0	2.194
3.68	Dnmt3b	2.603	Gm13238	1.762	Frk	3.453	Ppp1r9b		Shf	1.734	0.949	0	1.41
3.68	Dnmt3b	2.603	Hist1h1b	1.762	Frk	3.452	Gas2l1		Adamtsl4	1.765	2.338	0	2.941
3.68	Dnmt3b	2.602	Zfp91	1.762	Pvt1	3.452	Gas2l1		Ramp2	2.073	0.797	0.43	2.151
3.68	Dnmt3b	2.602	Zfp91Cntf	1.734	Prr13	3.452	Gas2l1		Usp27x	0	0	0	0
3.68	Dnmt3b	2.6	1110038B12Rik	1.734	Prr13	3.452	Gas2l1		Msh6	1.042	1.519	0	0.593
3.68	Dnmt3b	2.599	Tmem138	1.731	H2-M9	3.452	Clic1		Wnk3	0	0	0	0
3.68	Dnmt3b	2.599	Tmem138	1.717	Nlrp1a	3.451	Myo1c		Arl6ip1	0	0	0	1.057
3.672	Satb2	2.599	1110038B12Rik	1.715	Gsdmc	3.451	Myo1c		Hk1	0.85	0.944	0.783	0.637
3.669	Card10	2.598	Cbx3	1.713	AY358078	3.449	Flnc		Dock1	0	0	0	0.589
3.669	Hsp90aa1	2.598	Dapk3	1.711	Dnaja3	3.443	Mtag2		Irak3	0.539	1.022	0.198	1.726
3.667	AA388235	2.597	Plcd3	1.711	Dnaja3	3.443	Gm15417		Krt18	2.699	0.602	0.201	2.784
3.666	Mapk11	2.597	Acbd4	1.706	B020004C17Rik	3.443	Rcc1		Kdr	0.829	0.232	0	2.356
3.663	Trappc3	2.596	Slc30a4	1.705	Olfr1356	3.443	Rcc1		Kras	0	0.026	0	1.165
3.662	Gm13275	2.596	Slc30a4	1.703	Olfr206	3.436	Hist1h2ad		Kit	1.17	0.055	0	0.055
3.66	Hoxd11	2.596	Ptch1	1.7	Dhx40	3.435	Mir150		Kcnb1	1.225	0.019	0	0.095
3.647	Npm1	2.592	Nfkbie	1.7	Cenpw	3.427	Gm13286		Jun	1.642	1.316	0	2.257
3.647	Npm1	2.592	Nfkbie	1.698	Olfr763	3.426	Hist1h2bf		Hoxa13	0	0.357	0	0.465
3.647	Npm1	2.591	Vpreb3	1.697	Krtap16-3	3.425	Med29		Hoxa5	0	1.067	0	0.613
3.645	4930572O03Rik	2.59	Snord43	1.694	Morc2b	3.423	0610010K14Rik		Pdia2	0.686	0.188	0.132	0.848
3.639	B4gat1	2.588	Snn	1.693	Esp5	3.423	0610010K14Rik		Epha10	0.675	0.052	0	0.264
3.638	Abhd11	2.587	Smim15	1.691	Lims1	3.423	0610010K14Rik		Erp27	0	0.796	0	0.737
3.634	Abhd11	2.587	Hipk2	1.688	Olfr56	3.423	0610010K14Rik		Jak2	1.59	1.577	0	0.613
3.633	H2-K2	2.587	Hipk2	1.687	Olfr771	3.423	0610010K14Rik		Itpr1	0	2.209	0	0.819
3.629	Abhd11	2.587	Hipk2	1.684	Fgf14	3.423	0610010K14Rik		Madd	0.718	0.683	0	1.044
3.628	Zmynd8	2.585	Ier5l	1.675	Zfp433	3.42	Sprr2a1		Itgb1	0	0	0	0
3.627	Ier3	2.585	Efna1	1.672	Gm19668	3.42	Sprr2a2		Fcmr	0	0	0	0
3.627	Rin1	2.582	Cyb561a3	1.667	Olfr114	3.42	Paf1		Fnip1	1.136	0.649	0.351	1.212
3.622	Tbx2	2.582	Cyb561a3	1.665	Rgs20	3.419	Mdc1		Itgav	0.648	1.467	0	1.488
3.617	Taf8	2.582	Cyb561a3	1.665	Olfr787	3.419	Tead3		Itga6	0.597	0.723	0	0.934
3.614	Gm13287	2.582	Cyb561a3	1.661	2510002D24Rik	3.419	Slc38a1		Itga5	1.437	1.469	0.805	2.078
3.614	Gm13285	2.582	Cd79b	1.654	D830005E20Rik	3.416	Tead3		Itga4	0	1.946	0	0.788
3.612	Gata3	2.582	Uhrf1	1.649	Olfr772	3.415	Tbc1d24		Gsk3a	0	1.063	0	2.254
3.611	Snora75	2.582	Uhrf1	1.649	Olfr393	3.415	Tbc1d24		Sh3rf2	1.677	0.018	0	0.603
3.604	Brms1	2.58	Hist1h4b	1.641	Vmn2r114	3.415	Tbc1d24		Mapk8ip2	1.313	0.258	0	0.956
3.604	Gm13286	2.578	Pgs1	1.64	Zfp763	3.415	Tbc1d24		Ndufaf4	1.648	0	0	0
3.601	Gm13283	2.576	Pold2	1.639	Zbtb11	3.415	Tbc1d24		Tnip2	1.041	1.85	0	1.251
3.594	Hoxd9	2.576	Hist1h2bb	1.638	Cryga	3.415	Tbc1d24		Net1	1.018	1.175	0.395	0.058
3.59	2610027K06Rik	2.575	Rai14	1.636	9930111J21Rik2	3.412	Lfng		Sav1	0.605	1.094	0.052	0.919
3.58	Slc7a7	2.574	Ahnak	1.634	Olfr398	3.409	Btbd19		Syne1	0.873	1.72	0.642	1.229
3.578	Slc7a7	2.574	Ahnak	1.629	A530046M15Rik	3.408	Snord96a		Nfatc4	2.241	0.92	0.86	1.47
3.572	Mir7118	2.574	Ahnak	1.626	Serpinb3a	3.407	Hist1h2bb		Ube2b	1.674	1.46	0.079	1.117
3.568	Cgn	2.574	Ahnak	1.624	Vmn2r86	3.404	Pgs1		Id3	2.847	3.163	0	3.374
3.568	Cgn	2.572	Top3b	1.621	Olfr331	3.404	B330016D10Rik		Scx	1.203	0.932	0	1.908
3.564	Mir132	2.572	2310040G24Rik	1.619	Sec61g	3.402	Ppfia3		Wrn	0	0	0	0
3.564	Ypel4	2.572	2310040G24Rik	1.619	Sec61g	3.398	Nfic		Terf1	1.334	0.825	0.516	0
3.563	Mir212	2.571	Tmem138	1.619	Sec61g	3.398	Nfic		Fap	0	0	0	0.64
3.553	Efna3	2.57	Sh3bp5l	1.619	Krtap20-2	3.396	Tead3		Plk3	3.48	1.044	0	3.29
3.547	Wnt3	2.57	Sh3bp5l	1.616	Cuedc1	3.395	Hist1h3c		Nck1	0	0	0	0
3.541	Gm24148	2.569	Hnrnpf	1.615	4930432J09Rik	3.393	Cdc42bpg		Tardbp	1.45	1.177	0	1.368
3.53	Otx2	2.568	Rara	1.613	Akr1c6	3.392	Hist1h3d		Igfbp3	1.806	1.188	0.016	0.234
3.529	Rarg	2.567	Hist1h3h	1.607	Olfr199	3.392	Flot1		Igf2r	1.355	1.084	0.041	1.494
3.524	Rgl2	2.566	Plxdc1	1.604	Crp	3.391	Snora21		Igf1r	0	0.822	0	1.77
3.519	Hes2	2.566	Plxdc1	1.601	Gp49a	3.389	C130026I21Rik		Igf1	0.587	1.923	0.412	1.467
3.519	Hes2	2.564	Cbx8	1.601	Gp49a	3.389	C130026I21Rik		Ido1	0	0	0	0
3.516	Srcin1	2.562	Snora78	1.601	Gp49a	3.384	Map7d1		Bik	1.77	0.647	0	0.84
3.515	Itga3	2.559	Sit1	1.597	B3galnt2	3.384	Map7d1		Pik3ca	0.055	0.068	0	0.171
3.514	Cldn4	2.558	Cd2	1.596	Gm10408	3.381	Rps15		Tomm22	1.519	0.852	0.047	0.805
3.514	Asb6	2.557	Hist1h4h	1.595	Mir7663	3.379	Cwc25		Ffar4	0.627	0.037	0	0.041
3.512	Ovca2	2.555	Zfp672	1.595	1700091H14Rik	3.377	Aurkb		Cd274	2.064	1.809	0	0.398
3.509	Nab2	2.555	Atn1	1.592	Emr1	3.374	Id3		Qars	0	0	0	0
3.509	Nab2	2.554	Nfkbil1	1.588	Olfr103	3.373	Dlg4		Ccng1	1.546	0.704	0.408	0.707
3.508	H2-Q9	2.552	1700018L02Rik	1.588	Olfr91	3.373	Dlg4		Asic2	0.572	0.147	0.197	0.104
3.508	Mir7022	2.551	Aim1	1.584	Nek10	3.372	Set		Frs2	1.37	1.628	0.485	3.495
3.508	H2-Q7	2.55	Ak3	1.583	Vat1	3.369	Unc13d		Ralb	1.143	0.742	0	1.418
3.508	H2-Q7	2.549	Snhg9	1.583	Gm6682	3.367	Hist1h2ae		Med1	0.936	1.6	0.708	0.986
3.508	H2-Q7	2.547	Dak	1.582	Vmn1r202	3.367	Snord95		Tnfrsf11b	0	0.189	0.666	0
3.504	1700012D01Rik	2.545	Dnajb12	1.58	Gm904	3.365	Hist1h2bg		Pten	1.982	2.788	0	1.294
3.493	Trim7	2.542	Lpxn	1.579	Ifi27l2b	3.362	Myo1c		Bdkrb2	0.984	0.417	0.588	0.981
3.493	Cdk5r2	2.541	Ncor2	1.579	Wdr20	3.36	Gzmm		Ptgis	0.734	0.562	0	2.168
3.492	Otx2	2.541	Ncor2	1.578	Rpl31-ps12	3.36	Gzmm		Map3k9	1.039	0.066	0.015	0.034
3.491	4930412O13Rik	2.541	Ncor2	1.577	Mir6949	3.36	Gzmm		Bak1	2.062	0.889	0.069	1.904
3.488	Smarcd1	2.54	Rps2	1.576	Gm609	3.358	Hnrnpl		Ptrh2	0.675	0.946	0.585	0.809
3.481	Foxh1	2.54	Traf4	1.575	Nt5c	3.353	Proca1		Rhot2	2.157	0.655	0	1.918
3.48	Plk3	2.538	Hist1h2an	1.574	Gm11974	3.353	Tctex1d4		Ucp2	0	0	0	0.677
3.476	Zfp605	2.536	Zc3h12a	1.573	2310030A07Rik	3.352	Map3k11		Ung	1.979	0.55	0	1.7
3.475	Ppp1r9b	2.535	Arhgdia	1.57	Olfr1507	3.348	Agpat2		Atf2	0.825	0.82	0	1.124
3.47	Tpgs1	2.535	5930430L01Rik	1.567	Gm5795	3.347	Plec		Eya1	0.776	0.636	0.045	0.712
3.47	Gps2	2.535	5930430L01Rik	1.565	A4galt	3.344	Pcnxl3		Eya2	0.049	0.968	0	1.093
3.468	Pitx2	2.534	Rpl3	1.565	A4galt	3.342	Ahnak		Rapgef2	0.196	0.51	0	0.764
3.468	Pitx2	2.533	Mllt10	1.565	Epm2a	3.342	Ahnak		Eya3	1.158	0	0	1.266
3.466	Lmx1b	2.529	Uhrf1	1.563	Gdap1	3.342	Ahnak		Brca2	0.879	0.6	0	0.606
3.466	Trmt61a	2.529	Uhrf1	1.562	Gm10408	3.342	Ahnak		Etv6	0	0.593	0	1.657
3.466	Trmt61a	2.528	Mrps18b	1.561	Creb3l3	3.341	Snora7a		Irs2	0	0	0	0
3.466	Trmt61a	2.527	Sptan1	1.559	Olfr137	3.34	E130317F20Rik		Phlpp1	1.35	2.156	0.061	0.687
3.46	Mir1905	2.527	Sptan1	1.556	Cand1	3.339	Ptbp1		Bnip1	0.601	0.887	0.31	0.814
3.458	Btg2	2.527	Sptan1	1.55	Myh9	3.339	Ptbp1		Bnip2	0	0	0	0
3.451	Adamtsl5	2.527	Fosl1	1.548	4933412O06Rik	3.339	Ptbp1		Bnip3	0	0	0	1.502
3.451	Adamtsl5	2.526	Atf6	1.548	Wibg	3.339	Orai3		Fadd	0	0	0	0
3.451	Adamtsl5	2.525	Per1	1.548	Wibg	3.334	Rpl23		Htr2b	0.327	0.53	0	0.876
3.45	Hic1	2.524	Socs2	1.547	Mrs2	3.332	Zbtb7b		Eya4	0.574	0.173	0.015	0
3.448	Hist1h2bh	2.523	Rapgef3	1.547	Card10	3.332	Kcnab3		Hmox1	0	0	0	0
3.437	C130021I20Rik	2.523	Rapgef3	1.539	Gm8765	3.331	Abcg2		Hmgcr	0.603	0.277	0.088	0.675
3.433	Fam129b	2.523	Rapgef3	1.536	2310061J03Rik	3.324	Exoc3l4		Hmgb2	0	0	0	0
3.429	Cdc42ep1	2.521	Bcl6	1.534	Gm11127	3.324	Exoc3l4		Il19	0.049	0.471	1.241	0.118
3.425	Snora81	2.519	Slc6a6	1.529	D630023F18Rik	3.324	Exoc3l4		Gsdme	0	0	0	0
3.425	Lefty1	2.519	Actb	1.529	D630023F18Rik	3.324	Exoc3l4		Dffb	1.309	1.276	0	0.808
3.422	Ier5	2.519	Tns3	1.529	D630023F18Rik	3.32	Gltscr2		Kdm1a	1.162	1.052	0	0.565
3.421	Hist1h3f	2.515	Rn4.5s	1.528	Gm2696	3.32	Mbnl2		Klrk1	0	0.014	0	0
3.421	Tor3a	2.513	Rn4.5s	1.525	Smyd4	3.32	Mbnl2		Cul3	0.59	1.141	0.447	0.599
3.42	Fzr1	2.512	Gimap9	1.523	Gm8801	3.316	Hist1h4b		Atp2a1	0	0	0	1.316
3.419	Wnt4	2.511	Arid5a	1.521	4930448F12Rik	3.313	Procr		Dffa	1.182	1.095	0	0.901
3.414	Gm13242	2.511	Arid5a	1.521	Calm5	3.312	Snhg3		Unc5a	0.985	0	0	0.026
3.408	Ctdsp1	2.511	Arid5a	1.519	Rpa1	3.31	Rpl32		Sgms1	1.211	1.978	0	1.441
3.406	Snora78	2.511	Arid5a	1.519	Rpa1	3.301	Serpine1		Pigt	1.001	1.596	0	1.121
3.404	Ptma	2.511	Arid5a	1.518	Olfr819	3.297	Coro1c		Atf6	2.291	2.526	0.916	1.736
3.404	Rnf151	2.511	Arid5a	1.517	Olfr115	3.294	Rexo1		Ccar1	0.601	0.603	0	0.863
3.403	Thra	2.511	Ier5	1.516	H2-M1	3.294	Nr1d1		Ufl1	0.604	0	0	0.596
3.402	Arl4c	2.511	Gsn	1.515	Esp8	3.292	Snord116l2		Drd3	0.053	0.023	1.947	0.352
3.402	Mir21a	2.511	Gsn	1.512	Vmn1r233	3.292	Snord116		Pdk1	1.24	0.698	0	1.061
3.399	Hspb1	2.511	Pias4	1.512	Zbtb24	3.292	Snord116l1		Abraxas2	0	0	0	0
3.398	B3gnt7	2.511	Abca7	1.512	Zbtb24	3.291	Chd3		Dpep1	0	0	0	0
3.397	Kpnb1	2.506	Socs2	1.512	Zbtb24	3.29	2310047M10Rik		Dnmt1	0	0	0	0
3.397	Snhg9	2.505	Susd6	1.512	Zbtb24	3.29	Plk3		Dmpk	0	1.713	0	2.564
3.397	Hdgf	2.505	Susd6	1.511	Cfhr2	3.289	Plekhg2		Dlx1	2.011	0.48	0	0.625
3.396	Nid2	2.503	Afmid	1.508	Gm20172	3.289	Plekhg2		Pou3f3	1.77	0	0.011	0.628
3.396	Snai1	2.503	Ablim1	1.502	Olfr1507	3.289	Plekhg2		Nr2e1	2.053	0.409	0	0.357
3.394	Cdc42bpg	2.503	Tk1	1.5	Olfr108	3.289	Actn4		Ep300	1.234	1.443	0.42	1.077
3.393	Speer7-ps1	2.503	Tk1	1.498	Il18rap	3.286	Gzmm		Ndufa13	0	0	0	0
3.393	Hoxb3	2.502	Stambpl1	1.497	Vmn1r194	3.279	1600002K03Rik		Uri1	0	0.604	0	0.261
3.392	Btn2a2	2.502	D330023K18Rik	1.494	Rfesd	3.277	Samd14		Hspa4	0.745	1.374	0.163	0.987
3.392	Btn2a2	2.501	Vgll3	1.494	Rfesd	3.277	Polr3gl		Rps6ka2	0.944	0.979	0.051	0.448
3.392	Btn2a2	2.5	Szrd1	1.494	Rfesd	3.277	Polr3gl		Klf4	1.27	1.398	0	1.387
3.391	Snord2	2.5	Szrd1	1.49	C4b	3.277	Mir6933		Unc13b	0.708	0.837	0	1.49
3.391	Terc	2.5	Szrd1	1.488	Ang2	3.274	Setd1b		Steap3	1.994	1.015	0	0.666
3.389	Fkbp2	2.5	Szrd1	1.486	B3gnt5	3.269	Daam1		Trp53inp1	1.776	1.654	0	0.766
3.389	Mir26b	2.5	Gpr107	1.486	B3gnt5	3.268	Dhrs3		Tyro3	3.257	1.241	0	0.955
3.388	Rps2	2.5	Msh5	1.486	B3gnt5	3.267	Dhrs3		Ankrd1	1.332	1.405	0	1.319
3.388	Hoxc12	2.498	Ptma	1.483	Myc	3.263	Mir21a		Degs1	0.898	0.677	0.369	1.179
3.387	Pea15a	2.498	Speer7-ps1	1.483	Myc	3.259	Maff		Bcl2l10	0	0	0	0
3.386	Fkbp2	2.497	Hist1h2bp	1.483	Myc	3.259	Ehd2		Ppp1r15a	0	2.242	0	2.115
3.384	Krt8	2.497	Hist1h2bp	1.483	Myc	3.253	Maff		Ube4b	1.765	1.162	0	1.685
3.382	Gm13034	2.497	5730420D15Rik	1.483	Olfr164	3.252	Cdk9		Trp63	0.897	0.368	0.18	0
3.38	Ermard	2.497	5730420D15Rik	1.483	Cd84	3.248	Mir2861		Taok1	1.274	1.251	0.031	1.508
3.375	Sash1	2.496	Mir7655	1.483	Cd84	3.247	Dohh		Arg2	0.65	0.49	0.773	0.061
3.371	Msl1	2.496	Mbnl1	1.483	Cd84	3.245	Med16		Irf1	3.921	2.912	0.383	2.366
3.371	Pou5f1	2.496	Mbnl1	1.481	Dcdc2a	3.245	Med16		Zfp385a	2.21	0.564	0.281	2.042
3.371	Proca1	2.496	Mbnl1	1.481	Dcdc2a	3.245	Mtag2		Bag3	0	0	0	1.422
3.367	Tapbp	2.496	Mbnl1	1.481	Stfa3	3.245	Mir3960		Insr	0	0	0	0
3.367	Tapbp	2.496	Mbnl1	1.48	Zfp947	3.24	Pitpnm2		Ins2	0	0	0	0.413
3.367	Tgif1	2.494	Hist1h3g	1.48	Serpinb6e	3.239	BC107364		Inhbb	1.314	0.152	0	0.08
3.365	Bcl6b	2.493	Atat1	1.478	Wibg	3.239	BC107364		Inhba	0.511	0.528	0.365	0.518
3.364	Ppp1r16a	2.493	Atat1	1.478	Wibg	3.238	Clcf1		Inha	2.254	0.252	0.032	1.393
3.359	Eif1	2.493	Atat1	1.475	H2-Bl	3.234	Ntn3		Il7	1.242	0.019	0	0
3.358	Six3os1	2.493	Socs2	1.475	Sult3a1	3.228	Znf41-ps		Il6	0	0.847	0	0.125
3.358	Six3os1	2.491	Ppp2r4	1.475	Klc1	3.228	Git1		Il4	0.336	0.423	0.283	0.011
3.358	Six3os1	2.491	Socs2	1.475	Klc1	3.226	Llgl2		Il3	0.048	0.503	0.041	0.533
3.358	Six3os1	2.49	Hist1h2af	1.475	Klc1	3.226	Llgl2		Il2rb	0.045	0.526	0.017	0.834
3.358	Six3os1	2.489	Vegfa	1.475	Klc1	3.225	Ahdc1		Esr1	0.024	1.375	1.221	0.497
3.358	Six3os1	2.489	Vegfa	1.475	Klc1	3.215	Maff		Il2ra	0.4	2.058	0	0.205
3.358	Six3os1	2.489	Vegfa	1.474	Klc1	3.214	Ier3		Il2	0	0	0	0
3.358	Six3os1	2.489	Vegfa	1.474	Klc1	3.213	Tmbim1		Il1rn	0	0.916	0	0
3.356	Tgif1	2.489	Vegfa	1.474	Klc1	3.211	Sh3gl1		Casp1	0	0	0	0
3.351	Unc5b	2.489	Vegfa	1.469	Eapp	3.211	Sh3gl1		Il1b	0.3	0.024	0	0.566
3.351	Exoc3l4	2.488	Sp2	1.466	Map2k2	3.208	Hist2h2bb		Il1a	0.217	0.338	0	0.929
3.351	Exoc3l4	2.488	Sp2	1.465	Gm8300	3.206	Myl6b		Il13	1.007	0.426	0.36	0
3.35	Exoc3l4	2.488	Msh5	1.463	Ccdc71l	3.204	Sp110		Il12b	0.091	1.529	0.454	0.151
3.35	Exoc3l4	2.488	Msh5	1.461	Rdh9	3.202	B4galt5		Irak2	0	1.2	0	1.015
3.347	Rnd3	2.488	Msh5	1.461	Olfr1508	3.199	Apc2		Nr4a3	1.532	0.698	0	1.097
3.346	Fzd7	2.485	Grk6	1.46	Mir5615-2	3.198	Efemp2		Il12a	0.487	1.073	0	0.673
3.344	Jarid2	2.485	Grk6	1.46	Mir5615-1	3.197	Kcnk7		Il10	0.285	0.571	0.134	0.822
3.344	Jarid2	2.485	Grk6	1.457	5430440P10Rik	3.197	Efemp2		Cd74	0.878	1.065	0	0.804
3.343	Gm9758	2.485	Grk6	1.456	Zfp433	3.197	Flt3l		Ihh	2.151	0	0.093	0.171
3.342	Hoxd12	2.485	Grk6	1.455	Olfr257	3.197	Flt3l		Rbpj	2.348	1.393	0	1.212
3.338	Kdm2b	2.485	Grk6	1.455	Olfr285	3.197	Ech1		Tox3	0	0	0	0
3.336	Rara	2.485	Cald1	1.45	4930567J20Rik	3.196	Zfp600		Chac1	0.452	1.753	0	0.998
3.336	Rara	2.484	Ppp1r10	1.449	3110052M02Rik	3.193	Adssl1		Ivns1abp	0.96	0.299	0.288	0.982
3.334	Shc1	2.484	Grk6	1.448	Acot10	3.192	Snx24		Taf9b	0	0	0	0
3.333	Snora64	2.482	Flnc	1.447	Vmn1r227	3.187	Chaf1a		Hpn	0	0.47	0	0.622
3.332	Jarid2	2.482	Zc3h4	1.447	Rnf126	3.186	Arhgdia		Slc11a2	0.649	1.388	0	1.776
3.331	Grhl2	2.481	Ptrf	1.447	Rnf126	3.185	Polg		Cdk5rap3	1.223	0.696	0.388	1.437
3.33	Skil	2.481	A930006K02Rik	1.446	Gm19395	3.182	Smim24		Smarca4	0	0	0	0
3.33	Skil	2.48	H3f3b	1.446	A530054K11Rik	3.182	Hist2h3b		Braf	0	0.314	0	1.484
3.33	Skil	2.479	Tmem134	1.443	Mir6351	3.177	Gclm		Fastk	1.932	1.582	0	2.275
3.325	Gm5643	2.479	Tmem134	1.442	Olfr747	3.171	Aamp		Bmp6	0.574	0.178	0.224	0.91
3.323	Gm3417	2.477	Dlst	1.442	Raet1d	3.171	Aamp		Bmp5	0	0	0	0
3.323	Gm3448	2.476	Lmna	1.438	1110038F14Rik	3.169	Lmna		Bmp4	1.474	0.377	0.031	1.743
3.323	Tgif1	2.475	Snora64	1.437	Ttyh2	3.168	Gata2		Bmp3	0	0	0	0.309
3.323	Gm10052	2.475	Atp6v1g2	1.435	Olfr774	3.166	Pnkd		Bmp2	0	0.013	0	1.235
3.322	9030025P20Rik	2.474	Chaf1a	1.435	Gmpr2	3.166	Pnkd		Bmi1	2.249	1.253	0	1.733
3.32	A930024E05Rik	2.473	Mlec	1.43	Prl3d2	3.166	Ddx5		Slc9a1	1.52	0.65	0	1.851
3.32	Hnrnpa1	2.472	Aip	1.428	Rnd2	3.162	Sp110		Rest	2.598	1.117	0	0.599
3.32	Hnrnpa1	2.47	Mir6993	1.427	Pcmtd1	3.159	Abhd17a		Ywhah	1.575	1.948	0	1.033
3.32	Hnrnpa1	2.469	Snora74a	1.426	Mcpt-ps1	3.159	Mir6913		Golph3	0.598	0.952	0.06	0.562
3.318	43347	2.469	Socs3	1.423	C6	3.155	Tbkbp1		Bdnf	1.424	1.733	0	0.7
3.318	Cks1b	2.469	Efna1	1.422	Mir7094-2	3.154	Phlda3		Bcl3	0	1.759	0	1.787
3.315	Zbtb22	2.463	Mxd3	1.42	Vmn1r219	3.154	Hist1h4d		Gpx1	0	0	0	0
3.315	Mtss1	2.463	Gng7	1.42	4930435E12Rik	3.153	Wbp1l		Mtnr1b	0	0	0	0
3.315	Mtss1	2.461	Hnrnpl	1.419	Zfp748	3.152	Acadvl		Bcl2l1	2.009	2.31	0	2.445
3.314	Gm13247	2.46	Mir1894	1.414	Olfr75-ps1	3.149	Plec		Bcl2	2.098	2.31	0.17	0.016
3.314	Arhgap27	2.457	Clic1	1.414	Olfr75-ps1	3.149	Hsp90aa1		Rrn3	0.765	0.074	0.269	1.138
3.314	Arhgap27	2.457	Hist1h3c	1.414	Zfp81	3.149	1700037H04Rik		Ltbr	0	1.089	0	0.651
3.306	Sema6a	2.456	C230035I16Rik	1.414	Rpl10l	3.147	Arhgap23		Akt2	0	1.414	0	0.785
3.3	Prelid1	2.455	Tgtp1	1.412	Olfr1512	3.147	3110062M04Rik		Bnip3l	1.481	0.935	0.513	2.011
3.3	Ppp1r14b	2.455	Tgtp2	1.412	Tmem45a2	3.147	3110062M04Rik		Avp	0.147	0.087	0	0.161
3.3	Lmnb2	2.454	Crat	1.412	Nedd8	3.147	Chd2		Ptcra	1.14	0.972	0.411	1.908
3.3	Eif4a2	2.454	Ddb1	1.411	Tpbpb	3.146	Cic		Rorc	1.365	0	0	0.834
3.3	Eif4a2	2.453	Elmsan1	1.408	Kifc5b	3.146	Cic		Ier3	3.627	2.242	1.216	3.214
3.3	Eif4a2	2.453	Gimap4	1.407	Prl8a1	3.145	Fscn1		Tnfrsf21	0.606	1.47	0	0.862
3.3	Eif4a2	2.453	Gimap4	1.406	Gm9776	3.143	Trim41		Src	2.421	0.856	0	2.649
3.298	Rab24	2.453	Gimap4	1.405	Olfr775	3.14	Mybbp1a		Chd8	0.544	0.162	0.045	0.501
3.295	Skida1	2.453	Gimap4	1.404	Olfr743	3.14	Sp140		Dap	0.711	1.353	0.193	0
3.289	Jmjd8	2.453	Gimap4	1.403	Pde6g	3.139	Mir1942		Spp1	0.446	1.015	0	0.15
3.289	Cbx4	2.449	Hes7	1.403	Pde6g	3.136	Hist1h4a		Spn	0	0	0	0.207
3.283	Snord38a	2.445	Mtss1	1.402	Vmn2r118	3.136	Alyref		Sox8	1.225	1.052	0	1.625
3.283	Abhd11os	2.445	Mtss1	1.402	Ap3b1	3.136	Gm15417		Trim69	1.53	1.808	0	0.882
3.282	Lhx2	2.444	Nemf	1.401	Olfr418-ps1	3.135	Anapc11		Sox7	0.091	0.174	0.559	1.182
3.274	Tead3	2.444	Nek8	1.4	4933404K08Rik	3.134	Zfp600		Sox4	2.602	2.006	0	0.703
3.272	Tmem151a	2.442	Ddit3	1.398	Vmn1r203	3.133	Maff		Sox2	2.721	0	0	0
3.272	Pdgfa	2.442	Ddit3	1.397	Olfr378	3.125	Gm13051		Sox10	0.688	0.804	0.11	0.085
3.269	Pfn1	2.442	Mir674	1.393	2310009B15Rik	3.124	Pidd1		Rnf152	0.467	0	0.073	0.044
3.267	Cbx5	2.442	Park7	1.391	Kng2	3.122	Snora43		Sod2	0.791	1.522	0.26	1.537
3.267	Gm13271	2.442	Zeb2	1.391	Kng2	3.12	Gngt2		Snai1	3.396	1.997	0	2.006
3.264	Tead3	2.436	Tmem259	1.391	Kng2	3.12	Gngt2		Smpd1	0	0	0	0.658
3.262	Git1	2.436	Hsp90ab1	1.39	Oog1	3.12	Anapc11		Plac8	0	2.272	0	0.663
3.261	Gm13287	2.432	Rpl23	1.39	Gm2042	3.118	Rpl10a		Ar	0	0	0	0
3.261	Gm13285	2.429	Zeb2os	1.39	Gm2042	3.116	Ehd1		Araf	0	0	0	0
3.26	Ptpn14	2.425	Car11	1.389	Fbxo33	3.113	Isg20l2		Exoc5	0.61	0.865	0.544	0.601
3.26	Naa38	2.415	Kcnk4	1.388	P3h2	3.107	Abi3		Nkx2-6	0.642	0.304	0.302	0.439
3.26	Klhdc8a	2.413	Per1	1.386	Slc7a15	3.105	Lenep		Elmo3	0	0	0	0
3.258	Cyb5r1	2.412	Prelid1	1.384	Olfr92	3.104	Snord38a		Dcun1d3	0	0	0	0.653
3.257	Tyro3	2.41	Mir1949	1.384	1700024F13Rik	3.103	Abi3		Stambp	0	0.88	0	1.339
3.253	Hmga2	2.409	Trpm8	1.383	Lmnb2	3.103	Zfp36l1		Usp17la	0	0	0	0
3.252	Tead3	2.408	Rab24	1.382	Olfr220	3.102	Snord57		Rnf7	0	0	0	0
3.248	Phlda3	2.407	Ap3d1	1.381	Eif4ebp2	3.102	4930404N11Rik		Rps29	1.493	0.667	0.847	1.157
3.248	Prrg4	2.406	Mzb1	1.381	Ccdc122	3.096	Rrnad1		Uaca	0	0	0	0
3.248	Trim41	2.405	E030018B13Rik	1.38	Olfr116	3.096	Zc3h12a		Ifnb1	0.352	0.44	0	0.663
3.245	Gpr84	2.402	Kdm6b	1.378	Jam2	3.096	Zfp516		Ifng	0.495	0	3.463	0.407
3.245	Yif1a	2.402	Map3k5	1.377	Gm10373	3.095	Plxnb2		Rrm2b	0.604	1.109	0.157	0.616
3.243	Tenc1	2.401	Snord116l2	1.375	Adcy4	3.095	Plxnb2		Higd2a	1.602	1.097	0.086	1.37
3.243	Pou5f1	2.401	Snord116	1.374	Gal3st2	3.093	Mir7235		Rbm25	1.176	0.718	0.441	1.08
3.242	Ybx2	2.401	Snord116l1	1.372	Oprm1	3.091	Tenc1		Rpl11	2.355	1.541	0	1.155
3.241	Cfl1	2.398	Anapc11	1.372	Oprm1	3.091	Rnasek		Son	0.615	1.187	0.523	1.06
3.239	Srsf3	2.398	Scml4	1.372	Oprm1	3.09	Tcea2		Pkhd1	0	0.545	1.147	0
3.239	Srsf3	2.398	Sbno2	1.372	Oprm1	3.09	Smarca5-ps		Rrp8	0	0	0	1.673
3.239	Cd248	2.397	Sparc	1.372	Oprm1	3.088	Pla2g6		Aktip	0	0	0	0
3.238	Dot1l	2.397	Sparc	1.372	Oprm1	3.088	Pla2g6		Rassf7	0	0	0	1.467
3.236	Tmem151b	2.397	Tubb5	1.372	Spata31d1c	3.088	Pla2g6		Zfp830	1.453	0	0	1.287
3.234	Rps20	2.395	Kpnb1	1.372	Oprm1	3.088	Pla2g6		Trib3	1.571	0.159	0	1.688
3.231	Snord82	2.394	Acta2	1.37	Ipcef1	3.087	Gngt2		Mindy3	0	0	0	0
3.225	Wdr24	2.393	1700101E01Rik	1.37	2310039L15Rik	3.086	Lama5		Cdca7	1.008	1.742	0	0.595
3.224	Tgif1	2.393	Anapc11	1.37	Cyb5d1	3.083	Snf8		Tnfsf15	0.435	0.247	0	0.492
3.224	Hotair	2.392	Galk1	1.369	4930470H14Rik	3.082	Cep95		Adcy10	0.615	0.609	0.5	0.085
3.223	Mus81	2.392	Nrm	1.368	Idi2	3.082	Cep95		C1qbp	1.851	0.461	0.315	1.449
3.223	Tsen54	2.391	Rn4.5s	1.365	Bag2	3.079	Per1		Rassf5	2.078	1.258	0	0.079
3.215	Hic1	2.39	Phospho1	1.364	Spop	3.078	Dusp6		Cadm1	0	0	0	0
3.215	Syngap1	2.39	Alyref	1.364	Lacc1	3.074	Mir6910		Tmem173	1.149	1.617	0	0.539
3.214	Gpx4	2.389	Zc3h10	1.362	Olfr776	3.074	Fam129b		Sgk1	2.857	2.257	1.169	1.341
3.214	Cdk9	2.389	Ech1	1.361	4930503E24Rik	3.073	H3f3b		Creb3	1.382	1.208	0	2.771
3.213	Shc1	2.389	Endou	1.36	Ccdc28a	3.07	H2-T23		Scml2	0	0	0	0
3.212	Arhgef19	2.386	Rps11	1.358	Zfa-ps	3.07	Plec		Mtch1	2.338	2.031	0.442	1.651
3.207	Mir6896	2.385	Nxph4	1.358	Tubd1	3.07	Plec		Jak3	0	0	0	0
3.207	A730008H23Rik	2.381	Klhl21	1.358	Tubd1	3.07	Magi1		Kcnma1	0	0	0.062	0
3.206	Il17d	2.378	Elmsan1	1.358	Tubd1	3.07	Magi1		Crlf1	0	0	0	0
3.206	Dhdds	2.376	Slc39a1	1.358	Tubd1	3.07	Magi1		Mecp2	0	0	0	0
3.205	Phf23	2.376	Adora3	1.358	Txndc11	3.07	Magi1		Rrp1b	1.353	1.17	0	1.551
3.204	Phf23	2.374	A530032D15Rik	1.357	Emc2	3.07	Magi1		Tnfrsf8	1.355	0.021	0	0
3.204	Gpx4	2.374	Esyt2	1.356	Rps6kb1	3.065	Idh3b		Tie1	0.225	0	0	1.078
3.204	Hjurp	2.374	Hes1	1.356	Rps6kb1	3.064	Tbc1d24		Xiap	0	0	0	0
3.204	Sbno2	2.373	Rmnd5b	1.356	D1Ertd622e	3.064	Tbc1d24		Ano6	0.935	1.201	0.145	1.221
3.204	Mllt10	2.372	Snora21	1.354	Rn45s	3.061	Akap2		Senp1	0.775	0.546	0.021	1.025
3.201	Mir2861	2.371	Sec24c	1.354	H2-M2	3.061	Akap2		Sh3kbp1	0	0	0	0
3.198	Rara	2.371	Sec24c	1.352	Btg3	3.058	Fosl1		Ppif	0.971	1.506	0.156	1.973
3.197	Hoxb4	2.37	Snhg4	1.35	Olfr1	3.055	Bricd5		Plscr3	1.609	1.104	0.543	1.75
3.192	Ankrd39	2.368	Sell	1.35	Gm4850	3.054	Trappc1		Nell1	0	0	0	0
3.191	Mir3960	2.368	Sell	1.349	Wbp2	3.053	Kat5		Xaf1	0.08	0.606	0.814	0.603
3.191	Cers2	2.368	Mus81	1.348	Myct1	3.053	Kat5		Creb3l1	1.043	0.917	0	1.743
3.19	Nek7	2.365	Ywhaz	1.345	Zfp263	3.053	Kat5		Gsdma	0.438	0.161	0.261	0.674
3.19	6430706D22Rik	2.362	Lgals3	1.344	Wiz	3.053	Kat5		Hk2	0	1.471	0	0.957
3.19	Fev	2.362	Lgals3	1.343	Dnajc12	3.052	Hist1h3a		Pcsk9	0.024	0.017	0	0.522
3.186	43347	2.362	Nudt4	1.343	Naa38	3.049	Efna3		Adam8	0	0	0	0.954
3.186	43347	2.358	Crlf3	1.341	Sp1	3.047	Sorbs3		Ankle2	1.353	0.631	0	1.336
3.186	43347	2.358	Crlf3	1.341	Crkl	3.043	Cntrob		Mical1	0.951	1.511	0.87	1.856
3.184	Atxn7l3	2.357	Gm3417	1.341	Crkl	3.043	Trim8		Nptx1	0.716	0.057	0.039	0.447
3.184	Atxn7l3	2.357	Gm3448	1.338	Abcb5	3.042	AF357399		Il24	1.081	0.629	1.137	0.392
3.184	Mir6958	2.357	Tcte3	1.337	Rad51c	3.04	Sorbs3		Utp11	0	0	0	0
3.181	Otx2	2.357	Tcte3	1.337	1110057K04Rik	3.037	Cdk18		Sgk3	0.831	1.98	0.709	0.207
3.181	Otx2	2.356	Zeb2os	1.336	Gmnn	3.037	Scarna13		Dram2	0.624	0.581	0	0.593
3.177	Cbx7	2.353	Rnf19b	1.335	Prl3a1	3.033	Ddr1		Nradd	0	0	0	0
3.171	Mef2d	2.352	Cabp4	1.335	Olfr225	3.032	Lmna		Mtdh	0.714	1.078	0.226	0.867
3.171	2310047M10Rik	2.352	Mad2l1bp	1.335	1110057K04Rik	3.032	Lmna		Psmd9	0.09	0.059	0	0.953
3.171	Phf23	2.352	Ermard	1.335	1110057K04Rik	3.032	Ercc1		Dnajc5	1.642	0.684	0	1.197
3.171	Phf23	2.352	Ppp2r5b	1.334	Vmn2r124	3.032	Ercc1		Skil	3.33	2.013	0	1.214
3.169	Adipor1	2.352	Gpr152	1.332	1700065I16Rik	3.032	Kat5		Nrp1	0	0	0	0
3.168	Cyb5d1	2.351	Phf21a	1.332	1700065I16Rik	3.031	Snora17		Mnat1	1.446	0.713	0.344	1.702
3.164	C920025E04Rik	2.35	Myo10	1.332	Olfr109	3.027	Snord83b		Cdc42	1.408	0.875	0	1.656
3.16	Tmcc3	2.349	Kctd11	1.329	Ptprr	3.027	Per1		Stk26	0	0	0	0
3.159	Mir7655	2.348	Eml4	1.328	Mefv	3.027	Uck2		Tnfsf12	2.459	1.296	0.393	1.758
3.156	Kiss1r	2.348	Eml4	1.328	Mefv	3.025	Sbno2		Gadd45a	0	1.097	0	1.622
3.155	Mir10a	2.348	Eml4	1.328	Mefv	3.024	Snhg10		Zpr1	0	0	0	0
3.154	Rreb1	2.348	Eml4	1.326	Coro7	3.024	Itga3		Gadd45b	4.035	2.271	0.916	2.705
3.151	R3hdm4	2.348	Spop	1.326	D830030K20Rik	3.022	Mir3069		Apbb1	0	0	0	0.387
3.15	Gm13251	2.347	Cyr61	1.326	5430427M07Rik	3.021	Fzr1		Gfer	3.005	1.536	0	2.134
3.149	Cuedc1	2.347	Tgif1	1.325	Gm1821	3.02	Ndst1		Mcpt8	0	0	1.313	0.826
3.148	Il17rd	2.345	Dntt	1.325	Mrps24	3.017	Pycard		Casp3	0	0	0	0
3.146	Cldn7	2.345	Dntt	1.324	Dcaf11	3.014	Ddr1		Akr1c18	0.649	0.051	0.08	0.085
3.144	Rps18	2.345	Reep2	1.324	Mon2	3.014	Gm13271		Prkd1	0.6	0	0.658	0.6
3.144	Dvl2	2.345	Reep2	1.324	Mon2	3.013	1600014C23Rik		Fam72a	1.98	1.502	0.028	2.105
3.144	Sema4c	2.344	Abr	1.324	Mon2	3.012	Klf16		Thoc1	0.601	0.605	0	0.652
3.144	Sema4c	2.341	Snord35b	1.324	Dnajc15	3.01	Cdc6		Faim2	0.065	0.522	0.188	0.3
3.143	Mir1983	2.338	Ercc1	1.322	Hecw1	3.005	Cox20		Pdcd4	0.638	1.395	0	0.643
3.141	Eno3	2.338	Ercc1	1.321	Olfr1513	3.004	Glrx5		Unc5c	0.597	1.361	0	1.149
3.141	Eno3	2.338	Adamtsl4	1.321	Ptprr	3.003	Poldip3		Rgl2	3.524	1.659	0.083	2.772
3.141	Eno3	2.338	Adamtsl4	1.321	Ptprr	3.001	Mir1954		Nqo1	0	0	0	0
3.137	Plk5	2.338	Arf6	1.32	Ctsq	3	Cdc6		Bmpr2	1.42	0.807	0.528	1.181
3.137	Rps27rt	2.336	Ccdc85b	1.32	Urgcp	2.999	Mir6935		Cd38	0.671	0.585	0	0.578
3.137	Rps27	2.336	Ccdc85b	1.319	1700010J16Rik	2.997	Gpbar1		Slc30a10	0.699	0	0	0.741
3.137	Rps27	2.333	Snord52	1.317	Abr	2.996	Gngt2		Tpd52l1	1.247	1.335	0.103	0.109
3.133	Vps52	2.332	Ldb1	1.315	Rad51c	2.991	Wdr34		Gdnf	0.603	1.386	0.647	0.014
3.132	Sorbs3	2.332	Lrrc61	1.313	Mcpt8	2.99	Smtnl2		Pa2g4	2.185	1.242	0.599	1.324
3.13	Rab13	2.332	Lrrc61	1.312	Olfr790	2.989	Snhg7		Aurka	1.333	0.766	0	0.784
3.128	Zfp184	2.331	Mgat1	1.312	Zfp955b	2.989	Krt8		Tnfrsf18	0.483	0.427	0	0.273
3.122	Mir3089	2.331	Mgat1	1.311	Tex14	2.986	Bsg		Dele1	0	0	0	0
3.122	Tfap2c	2.331	Mtpap	1.31	Olfr816	2.986	Bsg		Endog	1.082	1.316	0	2.016
3.122	Six3	2.328	Tgif1	1.308	5031414D18Rik	2.985	Tgfb1		Bcl2l14	0	0.104	0	0
3.122	Gli2	2.327	Srsf10	1.308	4921530L21Rik	2.985	Slc16a11		Casp8	1.264	1.196	0.721	0.51
3.122	Mmp25	2.327	Srsf10	1.308	Cd2ap	2.983	Ak1		Pde3a	0	0	0	0
3.115	Hoxd8	2.327	Srsf10	1.307	Hdgfrp2	2.983	Grn		Usp28	0	0	0	0
3.112	Caskin2	2.327	Srsf10	1.307	Hdgfrp2	2.978	Arhgef25		Gskip	0.714	0.599	0.455	1.122
3.108	Zfhx2	2.327	Gpam	1.307	Hdgfrp2	2.977	Nol12		Mfn2	0.8	0.074	0	0.768
3.107	Snord55	2.326	Hexim2	1.306	Vmn1r204	2.975	Ccdc85b		Cd28	0.565	0.019	0.372	0.019
3.107	Scube3	2.326	Ptgs1	1.305	Dcaf11	2.975	Ccdc85b		Adamts20	0.651	0	0.115	0.053
3.105	Set	2.325	Hexim2	1.305	Dcaf11	2.972	Rnu12		Serpinb9	0.796	1.573	0	0.825
3.104	Dohh	2.324	Btg1	1.304	Nr1h4	2.971	Zfp516		Gpld1	2.096	0.618	0	0.037
3.103	Syngr1	2.324	Hexim2	1.303	Olfr204	2.97	Adk		Chil1	1.29	0.3	0	0.462
3.103	Syngr1	2.322	Zfp36	1.303	Olfr8	2.97	Ak1		Ddrgk1	1.419	1.349	0	0.752
3.101	Cs	2.322	Tex40	1.301	Snrpd3	2.97	Ndel1		Tpt1	2.468	1.167	0.647	2.234
3.097	Cfap45	2.322	Kdm3b	1.301	Cts3	2.968	St3gal5		Usp36	0.925	0.976	0.441	1.872
3.096	Tmem106c	2.321	Wnt5b	1.301	Cts3	2.968	St3gal5		Smpd2	1.064	1.343	0.923	1.197
3.096	Tmem106c	2.321	Fnbp1	1.3	Vmn2r81	2.968	Hist1h1a		Bcl2a1b	0	0	0	0
3.095	Mir3082	2.321	Fnbp1	1.299	Ctla2b	2.967	Arhgef25		Bcl2a1d	0	0	0	0
3.095	Ppp1r10	2.321	Fnbp1	1.299	Ctla2b	2.967	Sox18		Epcam	0.97	0.033	0	0.655
3.093	Wbscr25	2.321	Fnbp1	1.298	Ctgf	2.961	Snrnp70		Syce3	0.403	0	0.075	0.248
3.092	Pou3f2	2.319	Rab23	1.298	Ptgdr	2.961	Snrnp70		Lrp5	1.807	0.611	0	0.332
3.09	Foxd3	2.319	Fam53c	1.297	Gm5622	2.961	Snrnp70		Ryr2	0.708	0.012	0.257	0.079
3.089	Rreb1	2.318	Tgif1	1.294	Olfr43	2.957	Rps16		Tmbim6	0.38	1.134	0.107	1.42
3.089	Rreb1	2.318	Chd1	1.293	Olfr181	2.953	Otud7b		Cyfip2	0.036	1.313	0	0
3.088	Mrps18b	2.317	Hist1h4a	1.293	Rictor	2.953	Otud7b		Siglec1	0.175	0.791	0	1.22
3.081	1600002K03Rik	2.317	Tmem64	1.291	4930597G03Rik	2.952	Lrch4		Epha5	0.027	0.012	0	0
3.079	Thtpa	2.317	Jmjd1c	1.29	Gm5142	2.952	Lrch4		Rhbdd1	1.085	0.885	0	0.786
3.077	Meis2	2.314	B2m	1.29	Zfpm2	2.952	Gm20605		Lig4	0	0	0	0
3.077	Meis2	2.312	Gas7	1.289	Ankrd52	2.952	Tjap1		Gper1	0.068	0.344	0	0.742
3.077	Meis2	2.31	Bcl2l1	1.287	Fmo4	2.952	Tjap1		Casp14	0.111	0.471	1.058	0.443
3.077	Meis2	2.31	Bcl2l1	1.287	Ifi202b	2.952	Tjap1		Ago4	1.478	0.653	0	0.894
3.076	Set	2.31	Bcl2l1	1.287	Ifi202b	2.952	Tjap1		Fem1b	0	0	0	0
3.074	Mir1894	2.31	Bcl2	1.287	Gm8709	2.949	Pfdn6		Bag6	1.698	1.05	0.354	1.474
3.069	B3galt4	2.31	Bcl2	1.286	Gm6416	2.948	Pfdn6		Shq1	0	0.706	0	1.303
3.069	Meis2	2.309	Arhgef3	1.286	Olfr165	2.945	A530032D15Rik		Ctsh	0	0	0	0
[truncated: 21,335 more rows]
