# Supplementary figures and images for: Yap1 safeguards mouse embryonic stem cells from excessive apoptosis during differentiation
Source: eLife journal article supplement (doi:10.7554/elife.40167), 2018-12-18

Figure S6

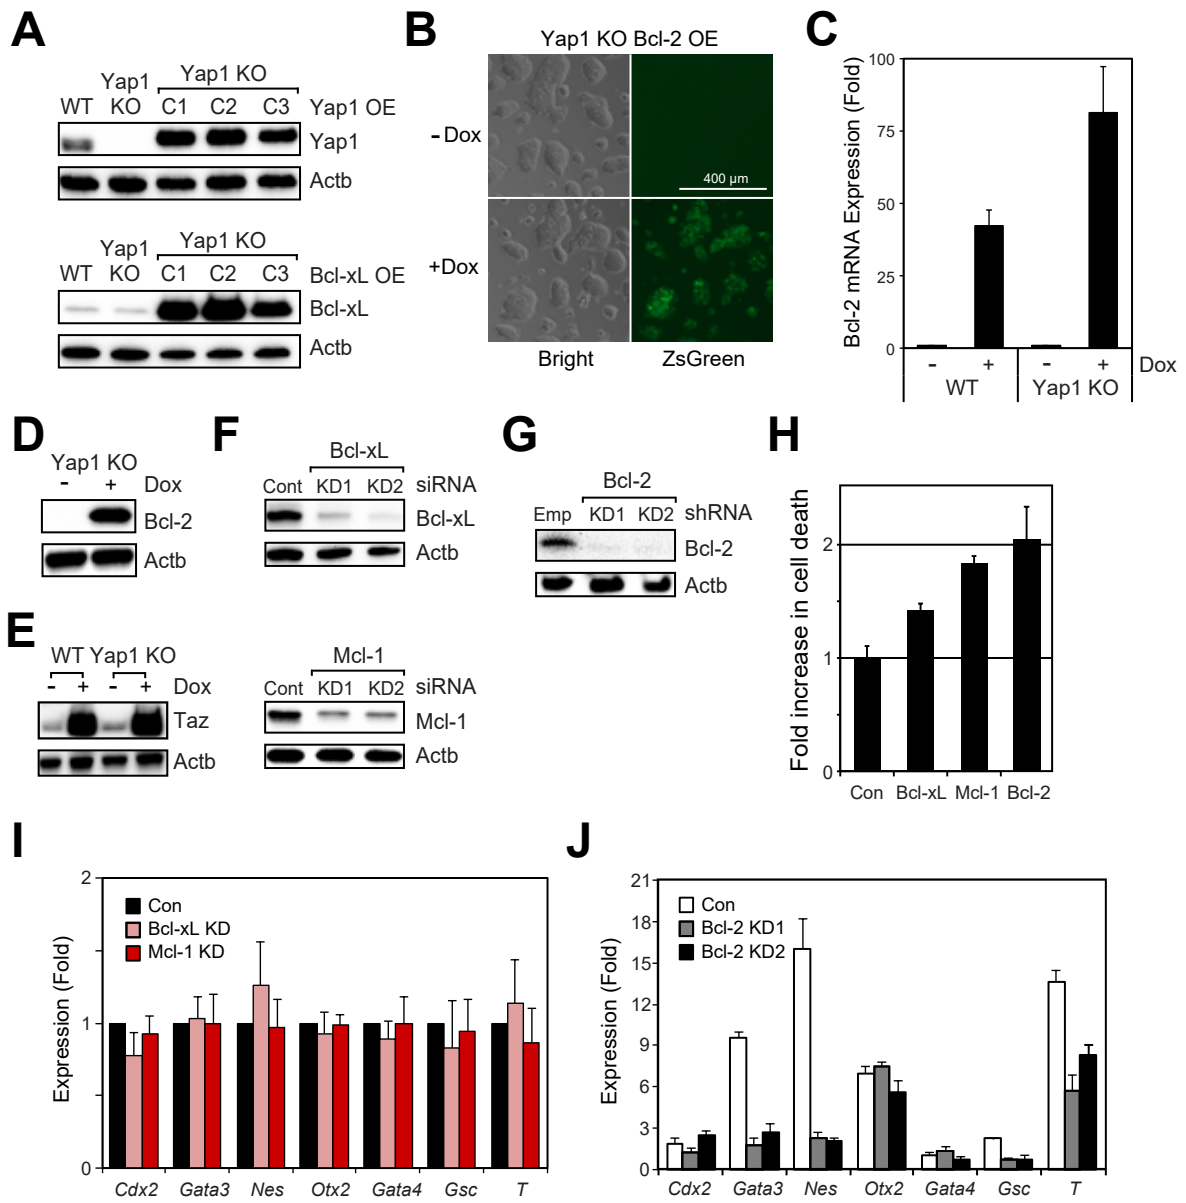

Supplement: supp [file elife-40167-supp-v1.zip]

Figure S2

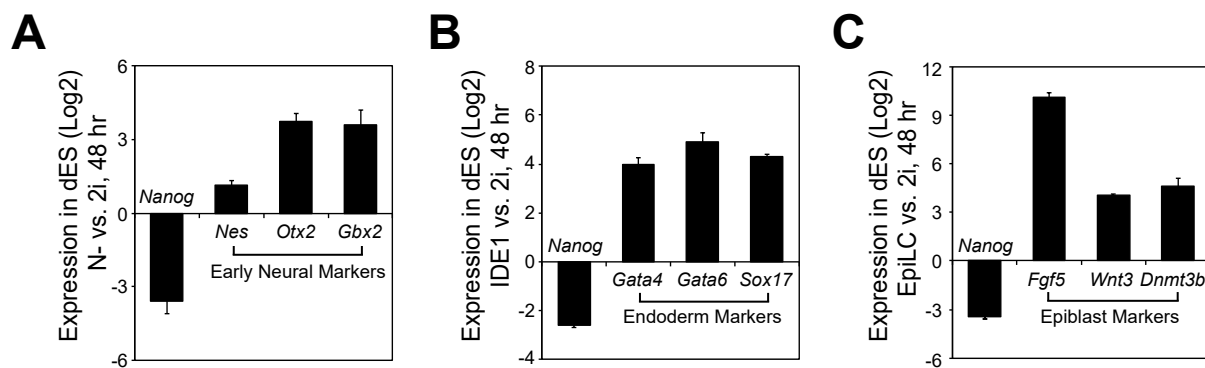

Supplement: supp [file elife-40167-supp-v1.zip]

Figure S3

**A**

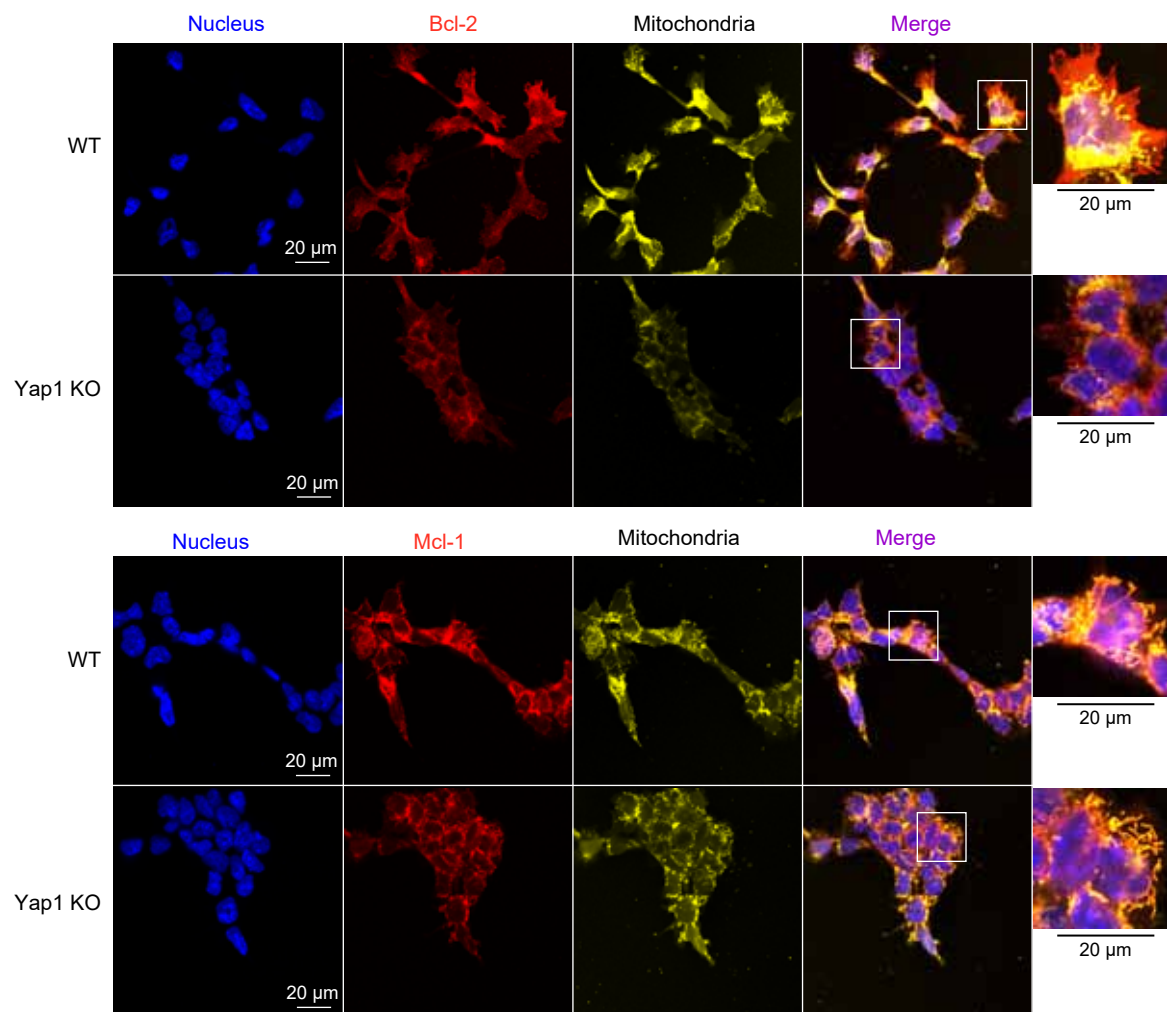

**B**

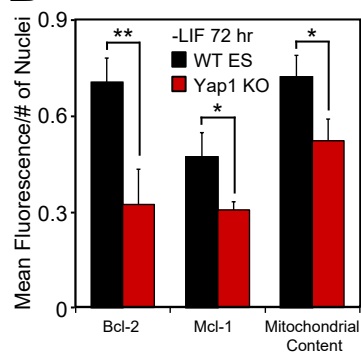

**C**

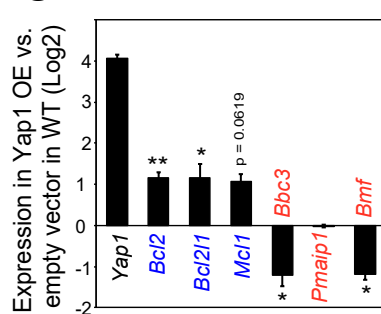

**D**

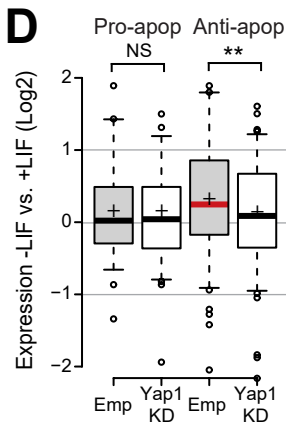

**E**

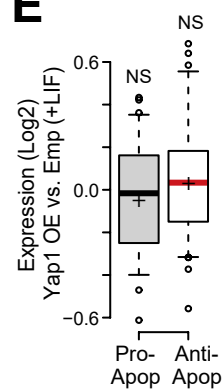

Supplement: supp [file elife-40167-supp-v1.zip]

Figure S4

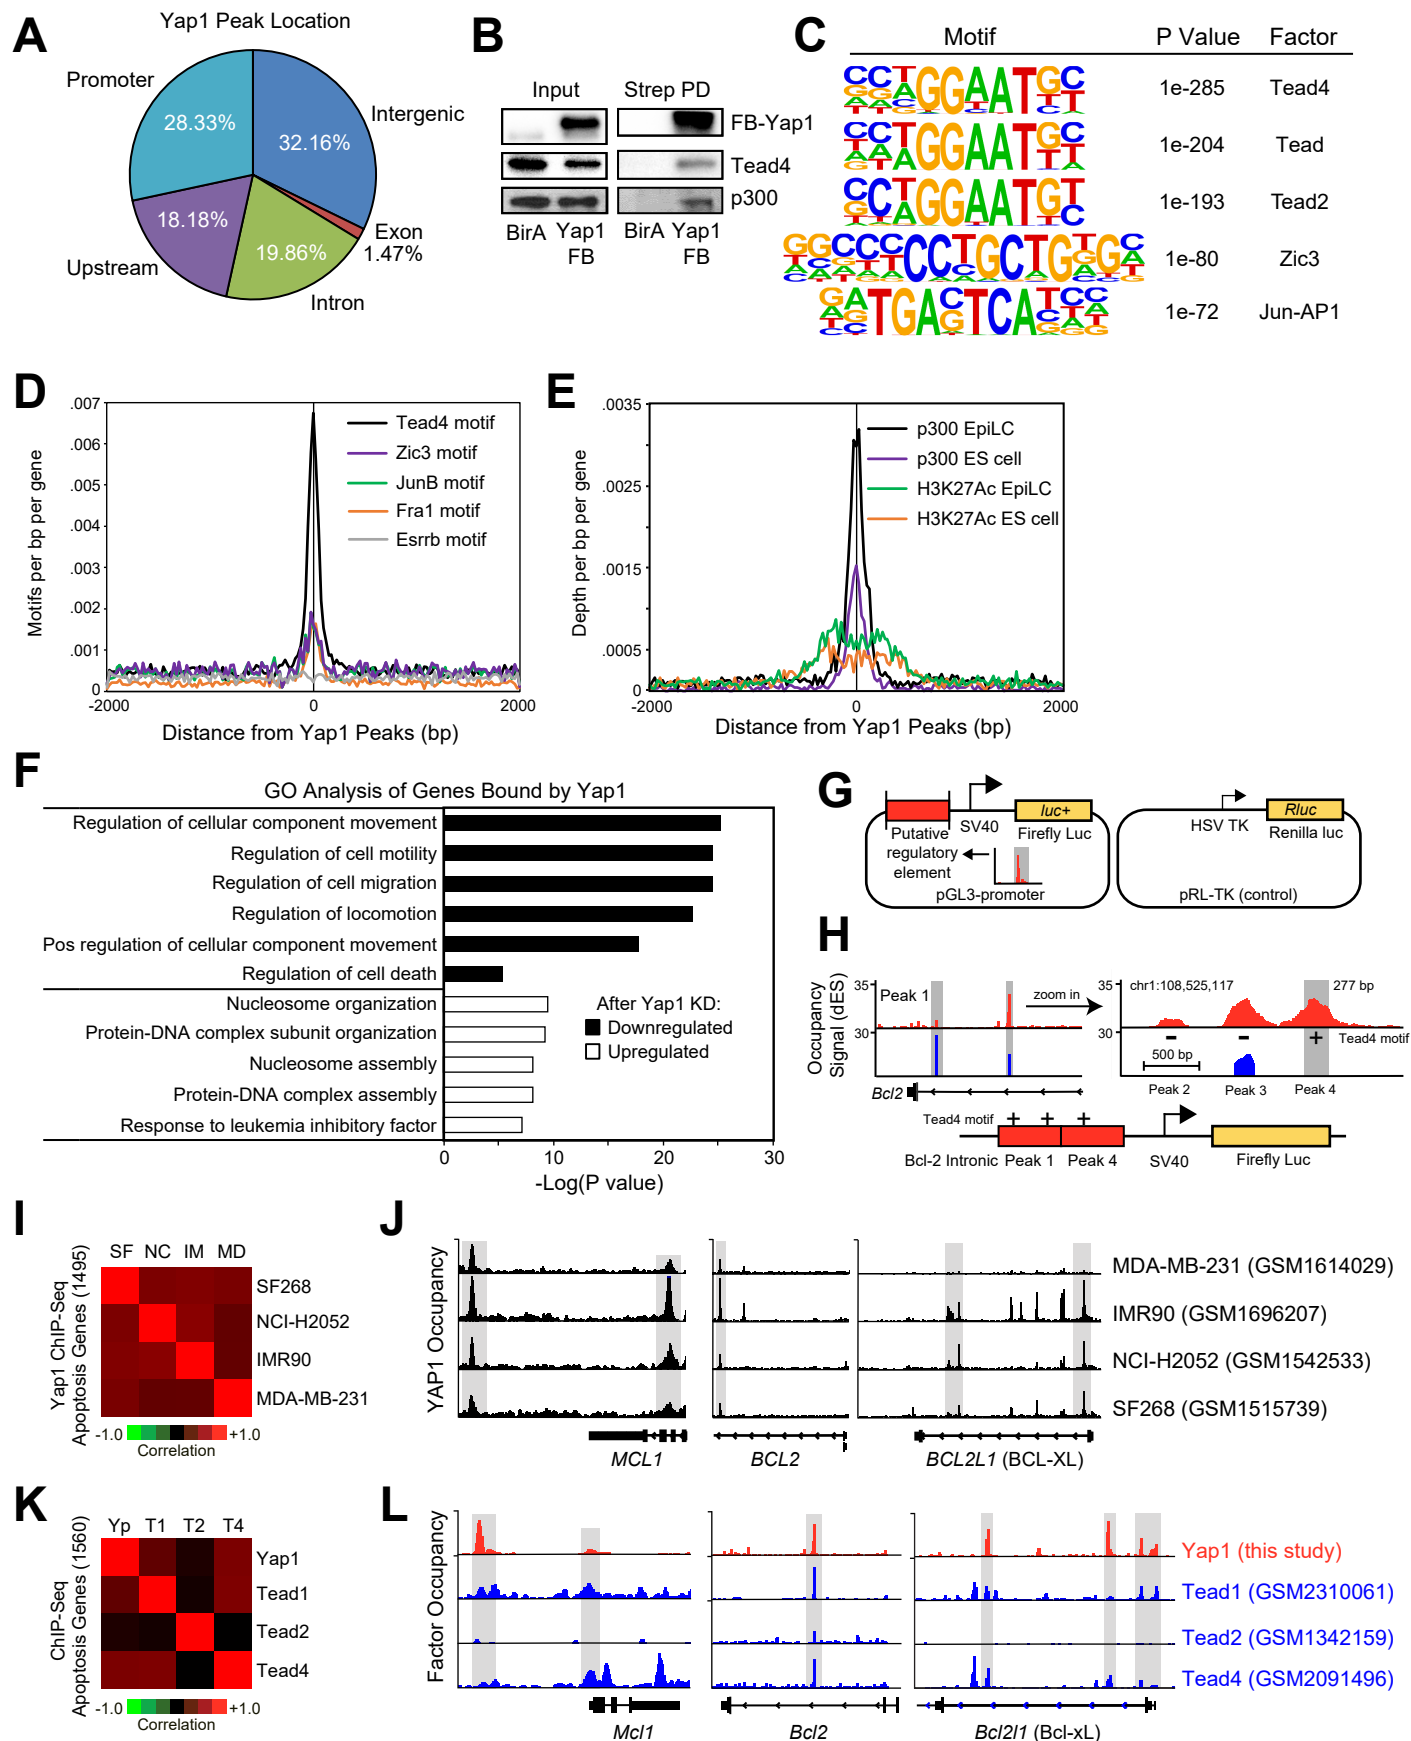

Supplement: supp [file elife-40167-supp-v1.zip]

Figure S1

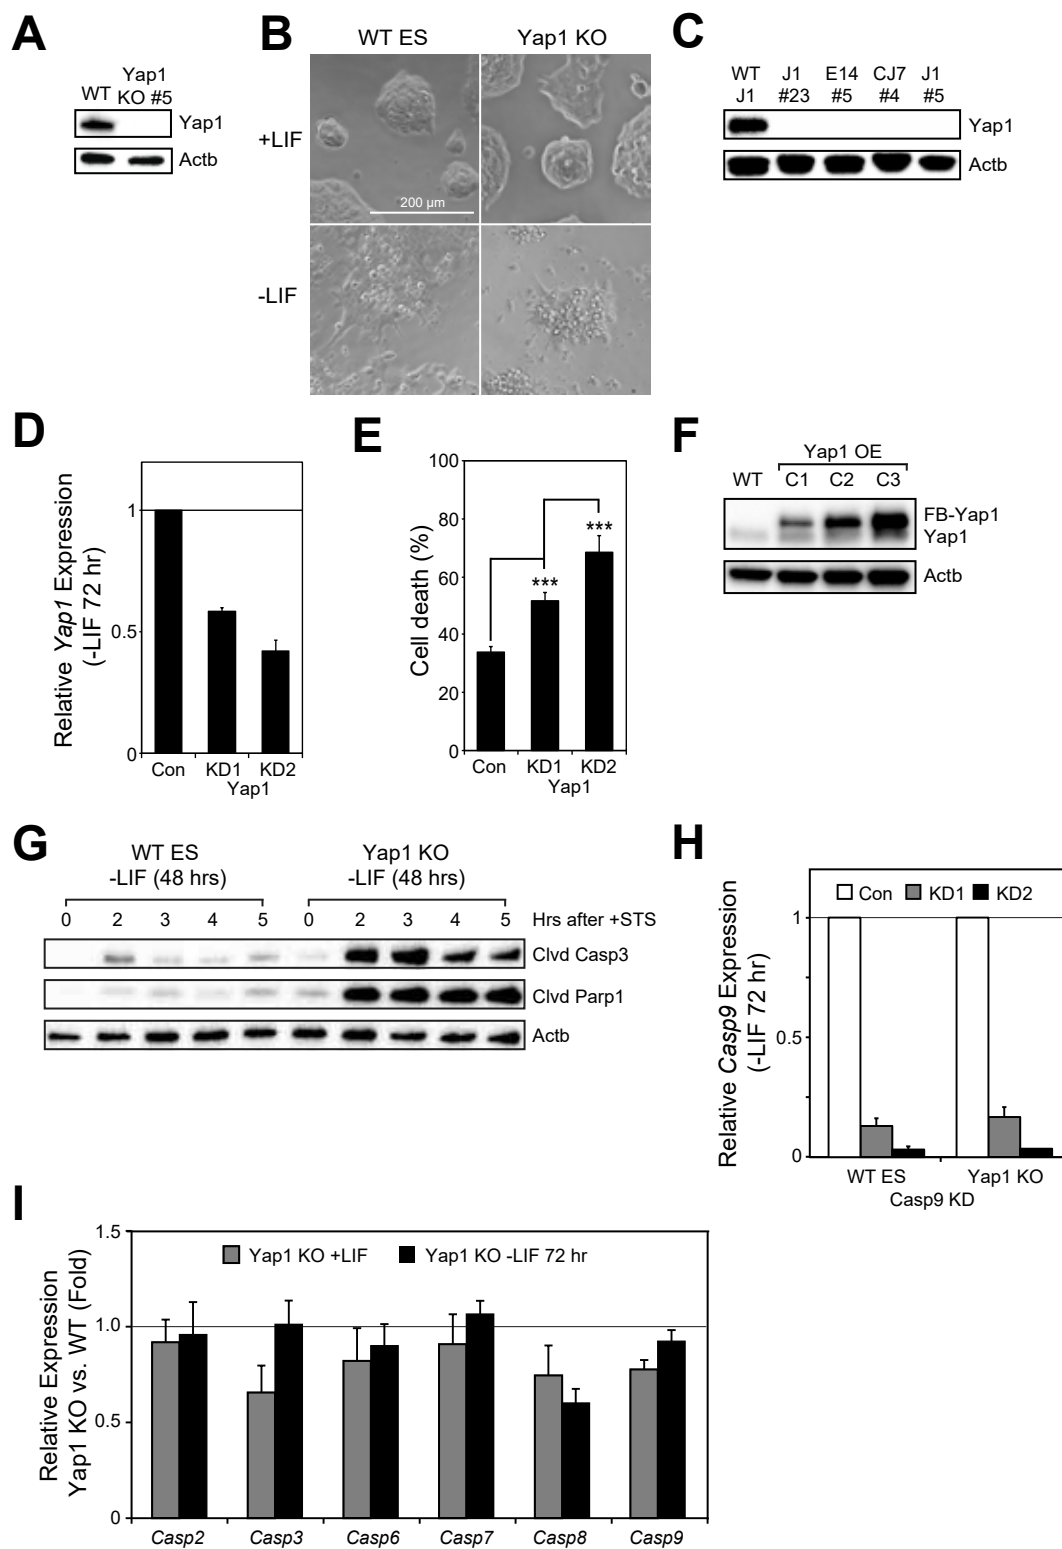

Supplement: supp [file elife-40167-supp-v1.zip]

Figure S5

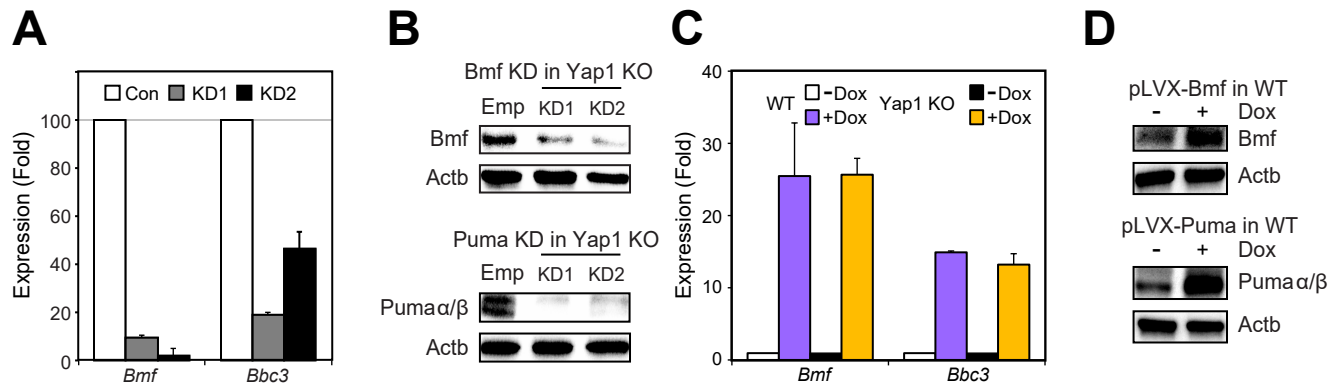

Supplement: supp [file elife-40167-supp-v1.zip]
